# Supplementary material for: A phenotypic screening platform utilising human spermatozoa identifies compounds with contraceptive activity
Source: eLife. 2020 Jan 28;9:e51739. doi: 10.7554/eLife.51739 (PMC7046468; doi:10.7554/eLife.51739)
Supplement: Figure 2—source data 2. [file elife-51739-fig2-data2.csv]

experiment	well_number	x	y	kinematic	value	neg_mad	neg_med	pos_mad	pos_med	reframe_id	conc_uM	datamode	assay	poc
W0002529	A01	01	A	VCL_median	60.41216106280254	2.2025378778962503	65.14170689866464	2.8305251245142977	10.337216852926119	RFM-008-929-2	9.99	Decreasing	Male contraceptive screen [Motility]	92.73960407083062
W0002529	A02	02	A	VCL_median	65.41926661712102	2.2025378778962503	65.14170689866464	2.8305251245142977	10.337216852926119	RFM-008-929-2	2.5	Decreasing	Male contraceptive screen [Motility]	100.42608603868513
W0002529	A03	03	A	VCL_median	65.79473978940388	2.2025378778962503	65.14170689866464	2.8305251245142977	10.337216852926119	RFM-008-929-2	1.25	Decreasing	Male contraceptive screen [Motility]	101.0024804719273
W0002529	A04	04	A	VCL_median	67.72004773007026	2.2025378778962503	65.14170689866464	2.8305251245142977	10.337216852926119	RFM-008-929-2	0.373	Decreasing	Male contraceptive screen [Motility]	103.95804923474992
W0002529	A05	05	A	VCL_median	69.6131291594413	2.2025378778962503	65.14170689866464	2.8305251245142977	10.337216852926119	RFM-008-929-2	0.0932	Decreasing	Male contraceptive screen [Motility]	106.86414660231804
W0002529	A06	06	A	VCL_median	66.46304392447249	2.2025378778962503	65.14170689866464	2.8305251245142977	10.337216852926119	RFM-008-929-2	0.0466	Decreasing	Male contraceptive screen [Motility]	102.02840405742413
W0002529	A07	07	A	VCL_median	66.83775656207303	2.2025378778962503	65.14170689866464	2.8305251245142977	10.337216852926119	RFM-008-929-2	0.0139	Decreasing	Male contraceptive screen [Motility]	102.60363098260041
W0002529	A08	08	A	VCL_median	66.4948222671818	2.2025378778962503	65.14170689866464	2.8305251245142977	10.337216852926119	RFM-008-929-2	0.00346	Decreasing	Male contraceptive screen [Motility]	102.07718746243799
W0002529	B11	11	B	VCL_median	54.39064719051736	2.2025378778962503	65.14170689866464	2.8305251245142977	10.337216852926119	RFM-009-180-5	9.99	Decreasing	Male contraceptive screen [Motility]	83.49588885524327
W0002529	B12	12	B	VCL_median	65.59044570624228	2.2025378778962503	65.14170689866464	2.8305251245142977	10.337216852926119	RFM-009-180-5	2.5	Decreasing	Male contraceptive screen [Motility]	100.68886559616207
W0002529	B13	13	B	VCL_median	67.69833533372271	2.2025378778962503	65.14170689866464	2.8305251245142977	10.337216852926119	RFM-009-180-5	1.25	Decreasing	Male contraceptive screen [Motility]	103.92471821322582
W0002529	B14	14	B	VCL_median	67.90905943407988	2.2025378778962503	65.14170689866464	2.8305251245142977	10.337216852926119	RFM-009-180-5	0.373	Decreasing	Male contraceptive screen [Motility]	104.24820390371437
W0002529	B15	15	B	VCL_median	66.03030375618924	2.2025378778962503	65.14170689866464	2.8305251245142977	10.337216852926119	RFM-009-180-5	0.0932	Decreasing	Male contraceptive screen [Motility]	101.36409820962615
W0002529	B16	16	B	VCL_median	69.94419348206226	2.2025378778962503	65.14170689866464	2.8305251245142977	10.337216852926119	RFM-009-180-5	0.0466	Decreasing	Male contraceptive screen [Motility]	107.3723683520735
W0002529	B17	17	B	VCL_median	68.24862466273584	2.2025378778962503	65.14170689866464	2.8305251245142977	10.337216852926119	RFM-009-180-5	0.0139	Decreasing	Male contraceptive screen [Motility]	104.76947552035189
W0002529	B18	18	B	VCL_median	69.27027495828455	2.2025378778962503	65.14170689866464	2.8305251245142977	10.337216852926119	RFM-009-180-5	0.00346	Decreasing	Male contraceptive screen [Motility]	106.33782603523481
W0002529	C13	13	C	VCL_median	3.7553591933437023	2.2025378778962503	65.14170689866464	2.8305251245142977	10.337216852926119	RFM-007-885-3	9.99	Decreasing	Male contraceptive screen [Motility]	5.764907571712224
W0002529	C14	14	C	VCL_median	4.679237571053954	2.2025378778962503	65.14170689866464	2.8305251245142977	10.337216852926119	RFM-007-885-3	2.5	Decreasing	Male contraceptive screen [Motility]	7.1831669660315205
W0002529	C15	15	C	VCL_median	6.588866305469221	2.2025378778962503	65.14170689866464	2.8305251245142977	10.337216852926119	RFM-007-885-3	1.25	Decreasing	Male contraceptive screen [Motility]	10.114666346890411
W0002529	C16	16	C	VCL_median	48.7614089562431	2.2025378778962503	65.14170689866464	2.8305251245142977	10.337216852926119	RFM-007-885-3	0.373	Decreasing	Male contraceptive screen [Motility]	74.85436178713745
W0002529	C17	17	C	VCL_median	61.63159595720196	2.2025378778962503	65.14170689866464	2.8305251245142977	10.337216852926119	RFM-007-885-3	0.0932	Decreasing	Male contraceptive screen [Motility]	94.61157665560859
W0002529	C18	18	C	VCL_median	66.40483580150797	2.2025378778962503	65.14170689866464	2.8305251245142977	10.337216852926119	RFM-007-885-3	0.0466	Decreasing	Male contraceptive screen [Motility]	101.93904790491332
W0002529	C19	19	C	VCL_median	68.17066634592125	2.2025378778962503	65.14170689866464	2.8305251245142977	10.337216852926119	RFM-007-885-3	0.0139	Decreasing	Male contraceptive screen [Motility]	104.64980055246096
W0002529	C20	20	C	VCL_median	64.77524667465407	2.2025378778962503	65.14170689866464	2.8305251245142977	10.337216852926119	RFM-007-885-3	0.00346	Decreasing	Male contraceptive screen [Motility]	99.43744147726949
W0002529	E17	17	E	VCL_median	44.20675473747994	2.2025378778962503	65.14170689866464	2.8305251245142977	10.337216852926119	RFM-000-926-7	9.99	Decreasing	Male contraceptive screen [Motility]	67.8624445721826
W0002529	E18	18	E	VCL_median	52.209076614760214	2.2025378778962503	65.14170689866464	2.8305251245142977	10.337216852926119	RFM-000-926-7	2.5	Decreasing	Male contraceptive screen [Motility]	80.14692752214398
W0002529	E19	19	E	VCL_median	59.567790515725015	2.2025378778962503	65.14170689866464	2.8305251245142977	10.337216852926119	RFM-000-926-7	1.25	Decreasing	Male contraceptive screen [Motility]	91.44339832603636
W0002529	E20	20	E	VCL_median	64.16846834767708	2.2025378778962503	65.14170689866464	2.8305251245142977	10.337216852926119	RFM-000-926-7	0.373	Decreasing	Male contraceptive screen [Motility]	98.50596707190749
W0002529	E21	21	E	VCL_median	63.83158418383087	2.2025378778962503	65.14170689866464	2.8305251245142977	10.337216852926119	RFM-000-926-7	0.0932	Decreasing	Male contraceptive screen [Motility]	97.98881119760676
W0002529	E22	22	E	VCL_median	64.23125774056433	2.2025378778962503	65.14170689866464	2.8305251245142977	10.337216852926119	RFM-000-926-7	0.0466	Decreasing	Male contraceptive screen [Motility]	98.60235599979501
W0002529	F01	01	F	VCL_median	66.39725833879156	2.2025378778962503	65.14170689866464	2.8305251245142977	10.337216852926119	RFM-000-926-7	0.0139	Decreasing	Male contraceptive screen [Motility]	101.92741562955985
W0002529	F02	02	F	VCL_median	66.6317935122905	2.2025378778962503	65.14170689866464	2.8305251245142977	10.337216852926119	RFM-000-926-7	0.00346	Decreasing	Male contraceptive screen [Motility]	102.28745405143262
W0002529	F11	11	F	VCL_median	22.760550503497903	2.2025378778962503	65.14170689866464	2.8305251245142977	10.337216852926119	RFM-000-224-4	9.99	Decreasing	Male contraceptive screen [Motility]	34.94005850799172
W0002529	F12	12	F	VCL_median	61.60904415528958	2.2025378778962503	65.14170689866464	2.8305251245142977	10.337216852926119	RFM-000-224-4	2.5	Decreasing	Male contraceptive screen [Motility]	94.57695705015756
W0002529	F13	13	F	VCL_median	63.254876510794695	2.2025378778962503	65.14170689866464	2.8305251245142977	10.337216852926119	RFM-000-224-4	1.25	Decreasing	Male contraceptive screen [Motility]	97.10349869891324
W0002529	F14	14	F	VCL_median	63.20235367311616	2.2025378778962503	65.14170689866464	2.8305251245142977	10.337216852926119	RFM-000-224-4	0.373	Decreasing	Male contraceptive screen [Motility]	97.02287011213052
W0002529	F15	15	F	VCL_median	63.813761509496096	2.2025378778962503	65.14170689866464	2.8305251245142977	10.337216852926119	RFM-000-224-4	0.0932	Decreasing	Male contraceptive screen [Motility]	97.96145134601045
W0002529	F16	16	F	VCL_median	66.2077778985499	2.2025378778962503	65.14170689866464	2.8305251245142977	10.337216852926119	RFM-000-224-4	0.0466	Decreasing	Male contraceptive screen [Motility]	101.63654139665648
W0002529	F17	17	F	VCL_median	65.98422157892773	2.2025378778962503	65.14170689866464	2.8305251245142977	10.337216852926119	RFM-000-224-4	0.0139	Decreasing	Male contraceptive screen [Motility]	101.2933567761338
W0002529	F18	18	F	VCL_median	63.70329892592829	2.2025378778962503	65.14170689866464	2.8305251245142977	10.337216852926119	RFM-000-224-4	0.00346	Decreasing	Male contraceptive screen [Motility]	97.79187859634388
W0002529	G05	05	G	VCL_median	47.95394116136843	2.2025378778962503	65.14170689866464	2.8305251245142977	10.337216852926119	RFM-004-547-6	9.99	Decreasing	Male contraceptive screen [Motility]	73.61480600434106
W0002529	G06	06	G	VCL_median	56.27153358606278	2.2025378778962503	65.14170689866464	2.8305251245142977	10.337216852926119	RFM-004-547-6	2.5	Decreasing	Male contraceptive screen [Motility]	86.38326544559169
W0002529	G07	07	G	VCL_median	59.31994468241303	2.2025378778962503	65.14170689866464	2.8305251245142977	10.337216852926119	RFM-004-547-6	1.25	Decreasing	Male contraceptive screen [Motility]	91.06292651295118
W0002529	G13	13	G	VCL_median	54.241759363975504	2.2025378778962503	65.14170689866464	2.8305251245142977	10.337216852926119	RFM-006-009-3	9.99	Decreasing	Male contraceptive screen [Motility]	83.26732894542471
W0002529	G14	14	G	VCL_median	65.99672817933546	2.2025378778962503	65.14170689866464	2.8305251245142977	10.337216852926119	RFM-006-009-3	2.5	Decreasing	Male contraceptive screen [Motility]	101.31255584383277
W0002529	G15	15	G	VCL_median	67.80483302187035	2.2025378778962503	65.14170689866464	2.8305251245142977	10.337216852926119	RFM-006-009-3	1.25	Decreasing	Male contraceptive screen [Motility]	104.08820439315247
W0002529	H07	07	H	VCL_median	39.75829810465317	2.2025378778962503	65.14170689866464	2.8305251245142977	10.337216852926119	RFM-004-705-2	9.99	Decreasing	Male contraceptive screen [Motility]	61.03355284580084
W0002529	H08	08	H	VCL_median	54.92037944252868	2.2025378778962503	65.14170689866464	2.8305251245142977	10.337216852926119	RFM-004-705-2	2.5	Decreasing	Male contraceptive screen [Motility]	84.30908868870077
W0002529	H09	09	H	VCL_median	56.54554600835655	2.2025378778962503	65.14170689866464	2.8305251245142977	10.337216852926119	RFM-004-705-2	1.25	Decreasing	Male contraceptive screen [Motility]	86.80390597734812
W0002529	H10	10	H	VCL_median	63.89479054500261	2.2025378778962503	65.14170689866464	2.8305251245142977	10.337216852926119	RFM-004-705-2	0.373	Decreasing	Male contraceptive screen [Motility]	98.08584021968943
W0002529	H11	11	H	VCL_median	63.24514535551407	2.2025378778962503	65.14170689866464	2.8305251245142977	10.337216852926119	RFM-004-705-2	0.0932	Decreasing	Male contraceptive screen [Motility]	97.08856025817548
W0002529	H12	12	H	VCL_median	65.63999422486707	2.2025378778962503	65.14170689866464	2.8305251245142977	10.337216852926119	RFM-004-705-2	0.0466	Decreasing	Male contraceptive screen [Motility]	100.76492826167048
W0002529	H13	13	H	VCL_median	66.92200120366923	2.2025378778962503	65.14170689866464	2.8305251245142977	10.337216852926119	RFM-004-705-2	0.0139	Decreasing	Male contraceptive screen [Motility]	102.73295618085973
W0002529	H14	14	H	VCL_median	64.7361234476895	2.2025378778962503	65.14170689866464	2.8305251245142977	10.337216852926119	RFM-004-705-2	0.00346	Decreasing	Male contraceptive screen [Motility]	99.37738283154589
W0002529	J19	19	J	VCL_median	51.3599394492487	2.2025378778962503	65.14170689866464	2.8305251245142977	10.337216852926119	RFM-003-386-3	9.99	Decreasing	Male contraceptive screen [Motility]	78.84340447072556
W0002529	J20	20	J	VCL_median	53.89600804830749	2.2025378778962503	65.14170689866464	2.8305251245142977	10.337216852926119	RFM-003-386-3	2.5	Decreasing	Male contraceptive screen [Motility]	82.73656097490489
W0002529	J21	21	J	VCL_median	57.62838823878762	2.2025378778962503	65.14170689866464	2.8305251245142977	10.337216852926119	RFM-003-386-3	1.25	Decreasing	Male contraceptive screen [Motility]	88.46619313865257
W0002529	J22	22	J	VCL_median	55.9023384950372	2.2025378778962503	65.14170689866464	2.8305251245142977	10.337216852926119	RFM-003-386-3	0.373	Decreasing	Male contraceptive screen [Motility]	85.81650858796142
W0002529	K01	01	K	VCL_median	61.03271425136807	2.2025378778962503	65.14170689866464	2.8305251245142977	10.337216852926119	RFM-003-386-3	0.0932	Decreasing	Male contraceptive screen [Motility]	93.69222447043248
W0002529	K02	02	K	VCL_median	59.26443132029817	2.2025378778962503	65.14170689866464	2.8305251245142977	10.337216852926119	RFM-003-386-3	0.0466	Decreasing	Male contraceptive screen [Motility]	90.97770712777108
W0002529	K03	03	K	VCL_median	61.95768355606375	2.2025378778962503	65.14170689866464	2.8305251245142977	10.337216852926119	RFM-003-386-3	0.0139	Decreasing	Male contraceptive screen [Motility]	95.11215856294032
W0002529	K04	04	K	VCL_median	64.396835541811285	2.2025378778962503	65.14170689866464	2.8305251245142977	10.337216852926119	RFM-003-386-3	0.00346	Decreasing	Male contraceptive screen [Motility]	98.85653693721584
W0002529	L07	07	L	VCL_median	51.001414603916274	2.2025378778962503	65.14170689866464	2.8305251245142977	10.337216852926119	RFM-003-055-7	9.99	Decreasing	Male contraceptive screen [Motility]	78.29302766544757
W0002529	L08	08	L	VCL_median	52.948667514267555	2.2025378778962503	65.14170689866464	2.8305251245142977	10.337216852926119	RFM-003-055-7	2.5	Decreasing	Male contraceptive screen [Motility]	81.28228447657236
W0002529	L09	09	L	VCL_median	59.37272297227638	2.2025378778962503	65.14170689866464	2.8305251245142977	10.337216852926119	RFM-003-055-7	1.25	Decreasing	Male contraceptive screen [Motility]	91.14394724816994
W0002529	L10	10	L	VCL_median	60.84805982986521	2.2025378778962503	65.14170689866464	2.8305251245142977	10.337216852926119	RFM-003-055-7	0.373	Decreasing	Male contraceptive screen [Motility]	93.40875873044179
W0002529	L11	11	L	VCL_median	60.67631588602569	2.2025378778962503	65.14170689866464	2.8305251245142977	10.337216852926119	RFM-003-055-7	0.0932	Decreasing	Male contraceptive screen [Motility]	93.14511205611272
W0002529	L12	12	L	VCL_median	62.691423436480235	2.2025378778962503	65.14170689866464	2.8305251245142977	10.337216852926119	RFM-003-055-7	0.0466	Decreasing	Male contraceptive screen [Motility]	96.23853353121972
W0002529	L13	13	L	VCL_median	62.19761391533233	2.2025378778962503	65.14170689866464	2.8305251245142977	10.337216852926119	RFM-003-055-7	0.0139	Decreasing	Male contraceptive screen [Motility]	95.48047921447288
W0002529	L14	14	L	VCL_median	61.42161646948563	2.2025378778962503	65.14170689866464	2.8305251245142977	10.337216852926119	RFM-003-055-7	0.00346	Decreasing	Male contraceptive screen [Motility]	94.28923403102404
W0002529	M09	09	M	VCL_median	51.645259236810986	2.2025378778962503	65.14170689866464	2.8305251245142977	10.337216852926119	RFM-002-146-5	9.99	Decreasing	Male contraceptive screen [Motility]	79.28140310653986
W0002529	M10	10	M	VCL_median	52.946631421413755	2.2025378778962503	65.14170689866464	2.8305251245142977	10.337216852926119	RFM-002-146-5	2.5	Decreasing	Male contraceptive screen [Motility]	81.27915884024698
W0002529	M11	11	M	VCL_median	53.618047347992565	2.2025378778962503	65.14170689866464	2.8305251245142977	10.337216852926119	RFM-002-146-5	1.25	Decreasing	Male contraceptive screen [Motility]	82.30985938302409
W0002529	M12	12	M	VCL_median	48.89441393068407	2.2025378778962503	65.14170689866464	2.8305251245142977	10.337216852926119	RFM-002-146-5	0.373	Decreasing	Male contraceptive screen [Motility]	75.05853969522921
W0002529	M13	13	M	VCL_median	50.66319058573306	2.2025378778962503	65.14170689866464	2.8305251245142977	10.337216852926119	RFM-002-146-5	0.0932	Decreasing	Male contraceptive screen [Motility]	77.77381496089048
W0002529	M14	14	M	VCL_median	57.86977274502733	2.2025378778962503	65.14170689866464	2.8305251245142977	10.337216852926119	RFM-002-146-5	0.0466	Decreasing	Male contraceptive screen [Motility]	88.83674607275853
W0002529	M15	15	M	VCL_median	60.91088517774257	2.2025378778962503	65.14170689866464	2.8305251245142977	10.337216852926119	RFM-002-146-5	0.0139	Decreasing	Male contraceptive screen [Motility]	93.50520285336768
W0002529	M16	16	M	VCL_median	59.04648942714011	2.2025378778962503	65.14170689866464	2.8305251245142977	10.337216852926119	RFM-002-146-5	0.00346	Decreasing	Male contraceptive screen [Motility]	90.64314129654856
W0002529	P07	07	P	VCL_median	11.366980469593207	2.2025378778962503	65.14170689866464	2.8305251245142977	10.337216852926119	RFM-003-300-1	9.99	Decreasing	Male contraceptive screen [Motility]	17.449620236810564
W0002529	P08	08	P	VCL_median	11.595257989918458	2.2025378778962503	65.14170689866464	2.8305251245142977	10.337216852926119	RFM-003-300-1	2.5	Decreasing	Male contraceptive screen [Motility]	17.80005244252535
W0002529	P09	09	P	VCL_median	53.021537597650386	2.2025378778962503	65.14170689866464	2.8305251245142977	10.337216852926119	RFM-003-300-1	1.25	Decreasing	Male contraceptive screen [Motility]	81.39414842188806
W0002529	P10	10	P	VCL_median	56.1361750377293	2.2025378778962503	65.14170689866464	2.8305251245142977	10.337216852926119	RFM-003-300-1	0.373	Decreasing	Male contraceptive screen [Motility]	86.17547453132526
W0002529	P11	11	P	VCL_median	59.94391728088927	2.2025378778962503	65.14170689866464	2.8305251245142977	10.337216852926119	RFM-003-300-1	0.0932	Decreasing	Male contraceptive screen [Motility]	92.02079609940047
W0002529	P12	12	P	VCL_median	57.54506154830361	2.2025378778962503	65.14170689866464	2.8305251245142977	10.337216852926119	RFM-003-300-1	0.0466	Decreasing	Male contraceptive screen [Motility]	88.3382771007544
W0002529	P13	13	P	VCL_median	63.19793348461553	2.2025378778962503	65.14170689866464	2.8305251245142977	10.337216852926119	RFM-003-300-1	0.0139	Decreasing	Male contraceptive screen [Motility]	97.01608461523297
W0002529	P14	14	P	VCL_median	61.25369156628106	2.2025378778962503	65.14170689866464	2.8305251245142977	10.337216852926119	RFM-003-300-1	0.00346	Decreasing	Male contraceptive screen [Motility]	94.03145002259178
W0002531	C05	05	C	VCL_median	7.657733163718023	1.8548948207217122	52.515114565139726	2.532591734817768	14.190819738076868	RFM-000-486-4	9.99	Decreasing	Male contraceptive screen [Motility]	14.581960312053349
W0002531	C06	06	C	VCL_median	38.814941814735704	1.8548948207217122	52.515114565139726	2.532591734817768	14.190819738076868	RFM-000-486-4	2.5	Decreasing	Male contraceptive screen [Motility]	73.91194351597512
W0002531	C07	07	C	VCL_median	45.39498464197821	1.8548948207217122	52.515114565139726	2.532591734817768	14.190819738076868	RFM-000-486-4	1.25	Decreasing	Male contraceptive screen [Motility]	86.44175113751355
W0002531	C08	08	C	VCL_median	52.32776531898416	1.8548948207217122	52.515114565139726	2.532591734817768	14.190819738076868	RFM-000-486-4	0.373	Decreasing	Male contraceptive screen [Motility]	99.64324700096925
W0002531	C09	09	C	VCL_median	53.60574866199751	1.8548948207217122	52.515114565139726	2.532591734817768	14.190819738076868	RFM-000-486-4	0.0932	Decreasing	Male contraceptive screen [Motility]	102.07680037621351
W0002531	C10	10	C	VCL_median	53.022354249219134	1.8548948207217122	52.515114565139726	2.532591734817768	14.190819738076868	RFM-000-486-4	0.0466	Decreasing	Male contraceptive screen [Motility]	100.96589274969634
W0002531	C11	11	C	VCL_median	53.262559013099285	1.8548948207217122	52.515114565139726	2.532591734817768	14.190819738076868	RFM-000-486-4	0.0139	Decreasing	Male contraceptive screen [Motility]	101.42329394908285
W0002531	C12	12	C	VCL_median	55.998458782354945	1.8548948207217122	52.515114565139726	2.532591734817768	14.190819738076868	RFM-000-486-4	0.00346	Decreasing	Male contraceptive screen [Motility]	106.63303173964226
W0002531	K05	05	K	VCL_median	3.9209522037864115	1.8548948207217122	52.515114565139726	2.532591734817768	14.190819738076868	RFM-011-941-5	9.99	Decreasing	Male contraceptive screen [Motility]	7.466330857800689
W0002531	K06	06	K	VCL_median	3.8957668380604376	1.8548948207217122	52.515114565139726	2.532591734817768	14.190819738076868	RFM-011-941-5	2.5	Decreasing	Male contraceptive screen [Motility]	7.4183725396392886
W0002531	K07	07	K	VCL_median	5.6041478049709	1.8548948207217122	52.515114565139726	2.532591734817768	14.190819738076868	RFM-011-941-5	1.25	Decreasing	Male contraceptive screen [Motility]	10.671494961740049
W0002531	K08	08	K	VCL_median	15.073322953011278	1.8548948207217122	52.515114565139726	2.532591734817768	14.190819738076868	RFM-011-941-5	0.373	Decreasing	Male contraceptive screen [Motility]	28.702827895984758
W0002531	K09	09	K	VCL_median	44.65962818746806	1.8548948207217122	52.515114565139726	2.532591734817768	14.190819738076868	RFM-011-941-5	0.0932	Decreasing	Male contraceptive screen [Motility]	85.0414753110217
W0002531	K10	10	K	VCL_median	44.8192864673384	1.8548948207217122	52.515114565139726	2.532591734817768	14.190819738076868	RFM-011-941-5	0.0466	Decreasing	Male contraceptive screen [Motility]	85.34549879300859
W0002531	K11	11	K	VCL_median	52.570906618767125	1.8548948207217122	52.515114565139726	2.532591734817768	14.190819738076868	RFM-011-941-5	0.0139	Decreasing	Male contraceptive screen [Motility]	100.10623999221824
W0002531	K12	12	K	VCL_median	54.09467505111082	1.8548948207217122	52.515114565139726	2.532591734817768	14.190819738076868	RFM-011-941-5	0.00346	Decreasing	Male contraceptive screen [Motility]	103.00782069895669
W0002531	K13	13	K	VCL_median	36.698441758061364	1.8548948207217122	52.515114565139726	2.532591734817768	14.190819738076868	RFM-010-155-3	9.99	Decreasing	Male contraceptive screen [Motility]	69.88167513667067
W0002531	K14	14	K	VCL_median	43.61344094230786	1.8548948207217122	52.515114565139726	2.532591734817768	14.190819738076868	RFM-010-155-3	2.5	Decreasing	Male contraceptive screen [Motility]	83.04931123821461
W0002531	K15	15	K	VCL_median	44.642189112069666	1.8548948207217122	52.515114565139726	2.532591734817768	14.190819738076868	RFM-010-155-3	1.25	Decreasing	Male contraceptive screen [Motility]	85.00826758493598
W0002531	K16	16	K	VCL_median	49.16382709909133	1.8548948207217122	52.515114565139726	2.532591734817768	14.190819738076868	RFM-010-155-3	0.373	Decreasing	Male contraceptive screen [Motility]	93.6184325335681
W0002531	K17	17	K	VCL_median	50.65906633693466	1.8548948207217122	52.515114565139726	2.532591734817768	14.190819738076868	RFM-010-155-3	0.0932	Decreasing	Male contraceptive screen [Motility]	96.46568755762148
W0002531	K18	18	K	VCL_median	46.59217217253896	1.8548948207217122	52.515114565139726	2.532591734817768	14.190819738076868	RFM-010-155-3	0.0466	Decreasing	Male contraceptive screen [Motility]	88.72145202072453
W0002531	K19	19	K	VCL_median	50.54108695229175	1.8548948207217122	52.515114565139726	2.532591734817768	14.190819738076868	RFM-010-155-3	0.0139	Decreasing	Male contraceptive screen [Motility]	96.24102959844181
W0002531	K20	20	K	VCL_median	50.127990758968195	1.8548948207217122	52.515114565139726	2.532591734817768	14.190819738076868	RFM-010-155-3	0.00346	Decreasing	Male contraceptive screen [Motility]	95.45440617251145
W0002531	N09	09	N	VCL_median	3.694774638808488	1.8548948207217122	52.515114565139726	2.532591734817768	14.190819738076868	RFM-011-751-1	9.99	Decreasing	Male contraceptive screen [Motility]	7.035640442572949
W0002531	N10	10	N	VCL_median	43.74941740305256	1.8548948207217122	52.515114565139726	2.532591734817768	14.190819738076868	RFM-011-751-1	2.5	Decreasing	Male contraceptive screen [Motility]	83.30823947605751
W0002531	N11	11	N	VCL_median	48.83891611217443	1.8548948207217122	52.515114565139726	2.532591734817768	14.190819738076868	RFM-011-751-1	1.25	Decreasing	Male contraceptive screen [Motility]	92.99973258478693
W0002531	N12	12	N	VCL_median	52.308035306848865	1.8548948207217122	52.515114565139726	2.532591734817768	14.190819738076868	RFM-011-751-1	0.373	Decreasing	Male contraceptive screen [Motility]	99.60567684178999
W0002531	N13	13	N	VCL_median	51.040319510797815	1.8548948207217122	52.515114565139726	2.532591734817768	14.190819738076868	RFM-011-751-1	0.0932	Decreasing	Male contraceptive screen [Motility]	97.19167507001708
W0002531	N14	14	N	VCL_median	54.662609304989736	1.8548948207217122	52.515114565139726	2.532591734817768	14.190819738076868	RFM-011-751-1	0.0466	Decreasing	Male contraceptive screen [Motility]	104.08928887927354
W0002531	N15	15	N	VCL_median	50.46382564307243	1.8548948207217122	52.515114565139726	2.532591734817768	14.190819738076868	RFM-011-751-1	0.0139	Decreasing	Male contraceptive screen [Motility]	96.09390755584684
W0002531	N16	16	N	VCL_median	53.44353307007503	1.8548948207217122	52.515114565139726	2.532591734817768	14.190819738076868	RFM-011-751-1	0.00346	Decreasing	Male contraceptive screen [Motility]	101.76790722561158
W0002533	C05	05	C	VCL_median	6.354062236069882	1.622996217272183	55.54174570563903	2.3480646102450526	7.6046836448378485	RFM-000-486-4	9.99	Decreasing	Male contraceptive screen [Motility]	11.440155787945946
W0002533	C06	06	C	VCL_median	28.54512108232911	1.622996217272183	55.54174570563903	2.3480646102450526	7.6046836448378485	RFM-000-486-4	2.5	Decreasing	Male contraceptive screen [Motility]	51.393993328212915
W0002533	C07	07	C	VCL_median	42.39650331691647	1.622996217272183	55.54174570563903	2.3480646102450526	7.6046836448378485	RFM-000-486-4	1.25	Decreasing	Male contraceptive screen [Motility]	76.33268054196584
W0002533	C08	08	C	VCL_median	54.057372189728135	1.622996217272183	55.54174570563903	2.3480646102450526	7.6046836448378485	RFM-000-486-4	0.373	Decreasing	Male contraceptive screen [Motility]	97.32746333941716
W0002533	C09	09	C	VCL_median	54.28380553770547	1.622996217272183	55.54174570563903	2.3480646102450526	7.6046836448378485	RFM-000-486-4	0.0932	Decreasing	Male contraceptive screen [Motility]	97.73514470610914
W0002533	C10	10	C	VCL_median	57.43583116550379	1.622996217272183	55.54174570563903	2.3480646102450526	7.6046836448378485	RFM-000-486-4	0.0466	Decreasing	Male contraceptive screen [Motility]	103.41020152643934
W0002533	C11	11	C	VCL_median	56.45116220369729	1.622996217272183	55.54174570563903	2.3480646102450526	7.6046836448378485	RFM-000-486-4	0.0139	Decreasing	Male contraceptive screen [Motility]	101.63735670621156
W0002533	C12	12	C	VCL_median	57.213088074772855	1.622996217272183	55.54174570563903	2.3480646102450526	7.6046836448378485	RFM-000-486-4	0.00346	Decreasing	Male contraceptive screen [Motility]	103.00916427436695
W0002533	K05	05	K	VCL_median	3.5410408608321164	1.622996217272183	55.54174570563903	2.3480646102450526	7.6046836448378485	RFM-011-941-5	9.99	Decreasing	Male contraceptive screen [Motility]	6.375458343709573
W0002533	K06	06	K	VCL_median	3.543548249361437	1.622996217272183	55.54174570563903	2.3480646102450526	7.6046836448378485	RFM-011-941-5	2.5	Decreasing	Male contraceptive screen [Motility]	6.37997276524506
W0002533	K07	07	K	VCL_median	7.46676897171479	1.622996217272183	55.54174570563903	2.3480646102450526	7.6046836448378485	RFM-011-941-5	1.25	Decreasing	Male contraceptive screen [Motility]	13.443525904438228
W0002533	K08	08	K	VCL_median	37.12034801048553	1.622996217272183	55.54174570563903	2.3480646102450526	7.6046836448378485	RFM-011-941-5	0.373	Decreasing	Male contraceptive screen [Motility]	66.83323964503475
W0002533	K09	09	K	VCL_median	49.85790591818314	1.622996217272183	55.54174570563903	2.3480646102450526	7.6046836448378485	RFM-011-941-5	0.0932	Decreasing	Male contraceptive screen [Motility]	89.76654457787627
W0002533	K10	10	K	VCL_median	50.54461847553172	1.622996217272183	55.54174570563903	2.3480646102450526	7.6046836448378485	RFM-011-941-5	0.0466	Decreasing	Male contraceptive screen [Motility]	91.00293451957532
W0002533	K11	11	K	VCL_median	54.38697894128599	1.622996217272183	55.54174570563903	2.3480646102450526	7.6046836448378485	RFM-011-941-5	0.0139	Decreasing	Male contraceptive screen [Motility]	97.9209030078509
W0002533	K12	12	K	VCL_median	50.76024513582766	1.622996217272183	55.54174570563903	2.3480646102450526	7.6046836448378485	RFM-011-941-5	0.00346	Decreasing	Male contraceptive screen [Motility]	91.39115901190353
W0002533	K13	13	K	VCL_median	41.06460339915697	1.622996217272183	55.54174570563903	2.3480646102450526	7.6046836448378485	RFM-010-155-3	9.99	Decreasing	Male contraceptive screen [Motility]	73.93466459767356
W0002533	K14	14	K	VCL_median	45.66341755638804	1.622996217272183	55.54174570563903	2.3480646102450526	7.6046836448378485	RFM-010-155-3	2.5	Decreasing	Male contraceptive screen [Motility]	82.21458828175064
W0002533	K15	15	K	VCL_median	43.436215154610494	1.622996217272183	55.54174570563903	2.3480646102450526	7.6046836448378485	RFM-010-155-3	1.25	Decreasing	Male contraceptive screen [Motility]	78.20462717325162
W0002533	K16	16	K	VCL_median	49.0756426571217	1.622996217272183	55.54174570563903	2.3480646102450526	7.6046836448378485	RFM-010-155-3	0.373	Decreasing	Male contraceptive screen [Motility]	88.35812060573954
W0002533	K17	17	K	VCL_median	54.309441576387115	1.622996217272183	55.54174570563903	2.3480646102450526	7.6046836448378485	RFM-010-155-3	0.0932	Decreasing	Male contraceptive screen [Motility]	97.78130104915518
W0002533	K18	18	K	VCL_median	51.07506413880244	1.622996217272183	55.54174570563903	2.3480646102450526	7.6046836448378485	RFM-010-155-3	0.0466	Decreasing	Male contraceptive screen [Motility]	91.9579741146251
W0002533	K19	19	K	VCL_median	53.0040664317414	1.622996217272183	55.54174570563903	2.3480646102450526	7.6046836448378485	RFM-010-155-3	0.0139	Decreasing	Male contraceptive screen [Motility]	95.43104156764021
W0002533	K20	20	K	VCL_median	52.61322508852201	1.622996217272183	55.54174570563903	2.3480646102450526	7.6046836448378485	RFM-010-155-3	0.00346	Decreasing	Male contraceptive screen [Motility]	94.72735222865043
W0002533	N09	09	N	VCL_median	3.417086465939842	1.622996217272183	55.54174570563903	2.3480646102450526	7.6046836448378485	RFM-011-751-1	9.99	Decreasing	Male contraceptive screen [Motility]	6.1522849570659295
W0002533	N10	10	N	VCL_median	8.347141835512566	1.622996217272183	55.54174570563903	2.3480646102450526	7.6046836448378485	RFM-011-751-1	2.5	Decreasing	Male contraceptive screen [Motility]	15.028591070491146
W0002533	N11	11	N	VCL_median	34.398374054756715	1.622996217272183	55.54174570563903	2.3480646102450526	7.6046836448378485	RFM-011-751-1	1.25	Decreasing	Male contraceptive screen [Motility]	61.93246830422243
W0002533	N12	12	N	VCL_median	51.204481715705285	1.622996217272183	55.54174570563903	2.3480646102450526	7.6046836448378485	RFM-011-751-1	0.373	Decreasing	Male contraceptive screen [Motility]	92.190983673937
W0002533	N13	13	N	VCL_median	53.31439028436828	1.622996217272183	55.54174570563903	2.3480646102450526	7.6046836448378485	RFM-011-751-1	0.0932	Decreasing	Male contraceptive screen [Motility]	95.98976338792929
W0002533	N14	14	N	VCL_median	53.49821108605177	1.622996217272183	55.54174570563903	2.3480646102450526	7.6046836448378485	RFM-011-751-1	0.0466	Decreasing	Male contraceptive screen [Motility]	96.32072310003072
W0002533	N15	15	N	VCL_median	50.007858750441336	1.622996217272183	55.54174570563903	2.3480646102450526	7.6046836448378485	RFM-011-751-1	0.0139	Decreasing	Male contraceptive screen [Motility]	90.0365267873893
W0002533	N16	16	N	VCL_median	52.02004978783093	1.622996217272183	55.54174570563903	2.3480646102450526	7.6046836448378485	RFM-011-751-1	0.00346	Decreasing	Male contraceptive screen [Motility]	93.6593712115704
W0002535	A01	01	A	VCL_median	45.943536254130514	3.157012314323323	50.12940611288278	4.952533580013708	14.393043936860249	RFM-009-231-9	9.99	Decreasing	Male contraceptive screen [Motility]	91.64987143608602
W0002535	A02	02	A	VCL_median	48.84594983748137	3.157012314323323	50.12940611288278	4.952533580013708	14.393043936860249	RFM-009-231-9	2.5	Decreasing	Male contraceptive screen [Motility]	97.43971378294151
W0002535	A03	03	A	VCL_median	48.53148929088343	3.157012314323323	50.12940611288278	4.952533580013708	14.393043936860249	RFM-009-231-9	1.25	Decreasing	Male contraceptive screen [Motility]	96.81241621254973
W0002535	A04	04	A	VCL_median	51.351448903016006	3.157012314323323	50.12940611288278	4.952533580013708	14.393043936860249	RFM-009-231-9	0.373	Decreasing	Male contraceptive screen [Motility]	102.43777631712092
W0002535	A05	05	A	VCL_median	50.92463437869644	3.157012314323323	50.12940611288278	4.952533580013708	14.393043936860249	RFM-009-231-9	0.0932	Decreasing	Male contraceptive screen [Motility]	101.58635086165381
W0002535	A06	06	A	VCL_median	52.71261046030299	3.157012314323323	50.12940611288278	4.952533580013708	14.393043936860249	RFM-009-231-9	0.0466	Decreasing	Male contraceptive screen [Motility]	105.15307191472263
W0002535	A07	07	A	VCL_median	53.40299789078688	3.157012314323323	50.12940611288278	4.952533580013708	14.393043936860249	RFM-009-231-9	0.0139	Decreasing	Male contraceptive screen [Motility]	106.53028238661462
W0002535	A08	08	A	VCL_median	52.115209168231516	3.157012314323323	50.12940611288278	4.952533580013708	14.393043936860249	RFM-009-231-9	0.00346	Decreasing	Male contraceptive screen [Motility]	103.96135364316315
W0002535	A17	17	A	VCL_median	39.92769357694275	3.157012314323323	50.12940611288278	4.952533580013708	14.393043936860249	RFM-007-451-1	9.99	Decreasing	Male contraceptive screen [Motility]	79.64924516965645
W0002535	A18	18	A	VCL_median	47.71174231657599	3.157012314323323	50.12940611288278	4.952533580013708	14.393043936860249	RFM-007-451-1	2.5	Decreasing	Male contraceptive screen [Motility]	95.17715452111555
W0002535	A19	19	A	VCL_median	47.17947632144467	3.157012314323323	50.12940611288278	4.952533580013708	14.393043936860249	RFM-007-451-1	1.25	Decreasing	Male contraceptive screen [Motility]	94.11537055756179
W0002535	A20	20	A	VCL_median	52.80734229618165	3.157012314323323	50.12940611288278	4.952533580013708	14.393043936860249	RFM-007-451-1	0.373	Decreasing	Male contraceptive screen [Motility]	105.34204649715701
W0002535	A21	21	A	VCL_median	52.083863552290865	3.157012314323323	50.12940611288278	4.952533580013708	14.393043936860249	RFM-007-451-1	0.0932	Decreasing	Male contraceptive screen [Motility]	103.89882424500895
W0002535	A22	22	A	VCL_median	53.500586113081965	3.157012314323323	50.12940611288278	4.952533580013708	14.393043936860249	RFM-007-451-1	0.0466	Decreasing	Male contraceptive screen [Motility]	106.72495499469485
W0002535	B01	01	B	VCL_median	50.87267081726647	3.157012314323323	50.12940611288278	4.952533580013708	14.393043936860249	RFM-007-451-1	0.0139	Decreasing	Male contraceptive screen [Motility]	101.48269202054774
W0002535	B02	02	B	VCL_median	49.59194071029639	3.157012314323323	50.12940611288278	4.952533580013708	14.393043936860249	RFM-007-451-1	0.00346	Decreasing	Male contraceptive screen [Motility]	98.92784406546507
W0002535	B03	03	B	VCL_median	35.93341430573025	3.157012314323323	50.12940611288278	4.952533580013708	14.393043936860249	RFM-009-109-8	9.99	Decreasing	Male contraceptive screen [Motility]	71.6813086211602
W0002535	B04	04	B	VCL_median	40.85718580968905	3.157012314323323	50.12940611288278	4.952533580013708	14.393043936860249	RFM-009-109-8	2.5	Decreasing	Male contraceptive screen [Motility]	81.50343077611114
W0002535	B05	05	B	VCL_median	43.28481196093489	3.157012314323323	50.12940611288278	4.952533580013708	14.393043936860249	RFM-009-109-8	1.25	Decreasing	Male contraceptive screen [Motility]	86.34614953040727
W0002535	B06	06	B	VCL_median	46.55489771464552	3.157012314323323	50.12940611288278	4.952533580013708	14.393043936860249	RFM-009-109-8	0.373	Decreasing	Male contraceptive screen [Motility]	92.86943796982537
W0002535	B07	07	B	VCL_median	52.62557854423187	3.157012314323323	50.12940611288278	4.952533580013708	14.393043936860249	RFM-009-109-8	0.0932	Decreasing	Male contraceptive screen [Motility]	104.97945741812329
W0002535	B08	08	B	VCL_median	52.70353082276299	3.157012314323323	50.12940611288278	4.952533580013708	14.393043936860249	RFM-009-109-8	0.0466	Decreasing	Male contraceptive screen [Motility]	105.13495951674297
W0002535	B09	09	B	VCL_median	51.34992406760813	3.157012314323323	50.12940611288278	4.952533580013708	14.393043936860249	RFM-009-109-8	0.0139	Decreasing	Male contraceptive screen [Motility]	102.43473451885097
W0002535	B10	10	B	VCL_median	51.564611701341235	3.157012314323323	50.12940611288278	4.952533580013708	14.393043936860249	RFM-009-109-8	0.00346	Decreasing	Male contraceptive screen [Motility]	102.86300137932338
W0002535	D07	07	D	VCL_median	34.97904639099728	3.157012314323323	50.12940611288278	4.952533580013708	14.393043936860249	RFM-007-125-0	9.99	Decreasing	Male contraceptive screen [Motility]	69.77750008095148
W0002535	D08	08	D	VCL_median	35.59482787740857	3.157012314323323	50.12940611288278	4.952533580013708	14.393043936860249	RFM-007-125-0	2.5	Decreasing	Male contraceptive screen [Motility]	71.00588384640973
W0002535	D09	09	D	VCL_median	38.36299639048662	3.157012314323323	50.12940611288278	4.952533580013708	14.393043936860249	RFM-007-125-0	1.25	Decreasing	Male contraceptive screen [Motility]	76.52792914422278
W0002535	D10	10	D	VCL_median	48.17093916567924	3.157012314323323	50.12940611288278	4.952533580013708	14.393043936860249	RFM-007-125-0	0.373	Decreasing	Male contraceptive screen [Motility]	96.09317744001712
W0002535	D11	11	D	VCL_median	52.018694369290905	3.157012314323323	50.12940611288278	4.952533580013708	14.393043936860249	RFM-007-125-0	0.0932	Decreasing	Male contraceptive screen [Motility]	103.76882233983338
W0002535	D12	12	D	VCL_median	51.654985069992165	3.157012314323323	50.12940611288278	4.952533580013708	14.393043936860249	RFM-007-125-0	0.0466	Decreasing	Male contraceptive screen [Motility]	103.0432815295558
W0002535	D13	13	D	VCL_median	47.279976290934854	3.157012314323323	50.12940611288278	4.952533580013708	14.393043936860249	RFM-007-125-0	0.0139	Decreasing	Male contraceptive screen [Motility]	94.31585162702406
W0002535	D14	14	D	VCL_median	52.25408630417881	3.157012314323323	50.12940611288278	4.952533580013708	14.393043936860249	RFM-007-125-0	0.00346	Decreasing	Male contraceptive screen [Motility]	104.23839090874449
W0002535	E17	17	E	VCL_median	42.57031428636451	3.157012314323323	50.12940611288278	4.952533580013708	14.393043936860249	RFM-007-307-4	9.99	Decreasing	Male contraceptive screen [Motility]	84.9208430486958
W0002535	E18	18	E	VCL_median	46.39787159063435	3.157012314323323	50.12940611288278	4.952533580013708	14.393043936860249	RFM-007-307-4	2.5	Decreasing	Male contraceptive screen [Motility]	92.55619642920632
W0002535	E19	19	E	VCL_median	48.01463777831552	3.157012314323323	50.12940611288278	4.952533580013708	14.393043936860249	RFM-007-307-4	1.25	Decreasing	Male contraceptive screen [Motility]	95.78138163096293
W0002535	E20	20	E	VCL_median	50.979406833735176	3.157012314323323	50.12940611288278	4.952533580013708	14.393043936860249	RFM-007-307-4	0.373	Decreasing	Male contraceptive screen [Motility]	101.69561298799019
W0002535	E21	21	E	VCL_median	54.44862368289424	3.157012314323323	50.12940611288278	4.952533580013708	14.393043936860249	RFM-007-307-4	0.0932	Decreasing	Male contraceptive screen [Motility]	108.6161355278882
W0002535	E22	22	E	VCL_median	53.92256576373349	3.157012314323323	50.12940611288278	4.952533580013708	14.393043936860249	RFM-007-307-4	0.0466	Decreasing	Male contraceptive screen [Motility]	107.56673566470978
W0002535	F01	01	F	VCL_median	54.831076424637956	3.157012314323323	50.12940611288278	4.952533580013708	14.393043936860249	RFM-007-307-4	0.0139	Decreasing	Male contraceptive screen [Motility]	109.37906645286766
W0002535	F02	02	F	VCL_median	48.78789700749987	3.157012314323323	50.12940611288278	4.952533580013708	14.393043936860249	RFM-007-307-4	0.00346	Decreasing	Male contraceptive screen [Motility]	97.32390784290949
W0002535	F03	03	F	VCL_median	46.45085898819825	3.157012314323323	50.12940611288278	4.952533580013708	14.393043936860249	RFM-008-567-6	9.99	Decreasing	Male contraceptive screen [Motility]	92.66189765663475
W0002535	F04	04	F	VCL_median	51.30955473226131	3.157012314323323	50.12940611288278	4.952533580013708	14.393043936860249	RFM-008-567-6	2.5	Decreasing	Male contraceptive screen [Motility]	102.35420427028605
W0002535	F05	05	F	VCL_median	53.89910591353942	3.157012314323323	50.12940611288278	4.952533580013708	14.393043936860249	RFM-008-567-6	1.25	Decreasing	Male contraceptive screen [Motility]	107.51993708476802
W0002535	F06	06	F	VCL_median	50.54823048365418	3.157012314323323	50.12940611288278	4.952533580013708	14.393043936860249	RFM-008-567-6	0.373	Decreasing	Male contraceptive screen [Motility]	100.83548640059345
W0002535	F07	07	F	VCL_median	50.75244075955077	3.157012314323323	50.12940611288278	4.952533580013708	14.393043936860249	RFM-008-567-6	0.0932	Decreasing	Male contraceptive screen [Motility]	101.24285263875863
W0002535	F08	08	F	VCL_median	53.10638577447031	3.157012314323323	50.12940611288278	4.952533580013708	14.393043936860249	RFM-008-567-6	0.0466	Decreasing	Male contraceptive screen [Motility]	105.93858952744
W0002535	F09	09	F	VCL_median	49.66258918173613	3.157012314323323	50.12940611288278	4.952533580013708	14.393043936860249	RFM-008-567-6	0.0139	Decreasing	Male contraceptive screen [Motility]	99.06877625859866
W0002535	F10	10	F	VCL_median	51.917960743468186	3.157012314323323	50.12940611288278	4.952533580013708	14.393043936860249	RFM-008-567-6	0.00346	Decreasing	Male contraceptive screen [Motility]	103.5678751640462
W0002535	F11	11	F	VCL_median	37.42577111031819	3.157012314323323	50.12940611288278	4.952533580013708	14.393043936860249	RFM-007-141-0	9.99	Decreasing	Male contraceptive screen [Motility]	74.65831736773781
W0002535	F12	12	F	VCL_median	40.66793185682454	3.157012314323323	50.12940611288278	4.952533580013708	14.393043936860249	RFM-007-141-0	2.5	Decreasing	Male contraceptive screen [Motility]	81.12589996627402
W0002535	F13	13	F	VCL_median	47.07837186682948	3.157012314323323	50.12940611288278	4.952533580013708	14.393043936860249	RFM-007-141-0	1.25	Decreasing	Male contraceptive screen [Motility]	93.91368363873511
W0002535	F14	14	F	VCL_median	49.10252898136214	3.157012314323323	50.12940611288278	4.952533580013708	14.393043936860249	RFM-007-141-0	0.373	Decreasing	Male contraceptive screen [Motility]	97.95154738277112
W0002535	F15	15	F	VCL_median	51.245557938437905	3.157012314323323	50.12940611288278	4.952533580013708	14.393043936860249	RFM-007-141-0	0.0932	Decreasing	Male contraceptive screen [Motility]	102.2265410905562
W0002535	F16	16	F	VCL_median	51.34445596897132	3.157012314323323	50.12940611288278	4.952533580013708	14.393043936860249	RFM-007-141-0	0.0466	Decreasing	Male contraceptive screen [Motility]	102.42382655272726
W0002535	F17	17	F	VCL_median	55.23871922932929	3.157012314323323	50.12940611288278	4.952533580013708	14.393043936860249	RFM-007-141-0	0.0139	Decreasing	Male contraceptive screen [Motility]	110.19224745041107
W0002535	F18	18	F	VCL_median	49.376838076268456	3.157012314323323	50.12940611288278	4.952533580013708	14.393043936860249	RFM-007-141-0	0.00346	Decreasing	Male contraceptive screen [Motility]	98.4987493470007
W0002535	G05	05	G	VCL_median	39.06026976575197	3.157012314323323	50.12940611288278	4.952533580013708	14.393043936860249	RFM-007-131-8	9.99	Decreasing	Male contraceptive screen [Motility]	77.91887595435496
W0002535	G06	06	G	VCL_median	46.024771136535826	3.157012314323323	50.12940611288278	4.952533580013708	14.393043936860249	RFM-007-131-8	2.5	Decreasing	Male contraceptive screen [Motility]	91.8119217947565
W0002535	G07	07	G	VCL_median	49.58090392952993	3.157012314323323	50.12940611288278	4.952533580013708	14.393043936860249	RFM-007-131-8	1.25	Decreasing	Male contraceptive screen [Motility]	98.90582748553271
W0002535	G08	08	G	VCL_median	51.419998011201095	3.157012314323323	50.12940611288278	4.952533580013708	14.393043936860249	RFM-007-131-8	0.373	Decreasing	Male contraceptive screen [Motility]	102.57452062251072
W0002535	G09	09	G	VCL_median	46.688248064234614	3.157012314323323	50.12940611288278	4.952533580013708	14.393043936860249	RFM-007-131-8	0.0932	Decreasing	Male contraceptive screen [Motility]	93.13545019683801
W0002535	G10	10	G	VCL_median	49.50057305855363	3.157012314323323	50.12940611288278	4.952533580013708	14.393043936860249	RFM-007-131-8	0.0466	Decreasing	Male contraceptive screen [Motility]	98.74558048241559
W0002535	G11	11	G	VCL_median	53.675864907895175	3.157012314323323	50.12940611288278	4.952533580013708	14.393043936860249	RFM-007-131-8	0.0139	Decreasing	Male contraceptive screen [Motility]	107.07460764052617
W0002535	G12	12	G	VCL_median	52.30824467309205	3.157012314323323	50.12940611288278	4.952533580013708	14.393043936860249	RFM-007-131-8	0.00346	Decreasing	Male contraceptive screen [Motility]	104.34642803328428
W0002535	G21	21	G	VCL_median	10.4748163108228	3.157012314323323	50.12940611288278	4.952533580013708	14.393043936860249	RFM-007-403-3	9.99	Decreasing	Male contraceptive screen [Motility]	20.895552377451505
W0002535	G22	22	G	VCL_median	49.341591867910395	3.157012314323323	50.12940611288278	4.952533580013708	14.393043936860249	RFM-007-403-3	2.5	Decreasing	Male contraceptive screen [Motility]	98.42843890231143
W0002535	H01	01	H	VCL_median	48.51296548604978	3.157012314323323	50.12940611288278	4.952533580013708	14.393043936860249	RFM-007-403-3	1.25	Decreasing	Male contraceptive screen [Motility]	96.77546423910736
W0002535	H02	02	H	VCL_median	49.027765441156106	3.157012314323323	50.12940611288278	4.952533580013708	14.393043936860249	RFM-007-403-3	0.373	Decreasing	Male contraceptive screen [Motility]	97.80240629772081
W0002535	H03	03	H	VCL_median	52.81773351460024	3.157012314323323	50.12940611288278	4.952533580013708	14.393043936860249	RFM-007-403-3	0.0932	Decreasing	Male contraceptive screen [Motility]	105.3627752853561
W0002535	H04	04	H	VCL_median	52.11160010110215	3.157012314323323	50.12940611288278	4.952533580013708	14.393043936860249	RFM-007-403-3	0.0466	Decreasing	Male contraceptive screen [Motility]	103.95415414209337
W0002535	H05	05	H	VCL_median	53.133504712703456	3.157012314323323	50.12940611288278	4.952533580013708	14.393043936860249	RFM-007-403-3	0.0139	Decreasing	Male contraceptive screen [Motility]	105.99268739201888
W0002535	H06	06	H	VCL_median	51.10137513819622	3.157012314323323	50.12940611288278	4.952533580013708	14.393043936860249	RFM-007-403-3	0.00346	Decreasing	Male contraceptive screen [Motility]	101.93891988890658
W0002535	J03	03	J	VCL_median	32.99282497618162	3.157012314323323	50.12940611288278	4.952533580013708	14.393043936860249	RFM-004-129-2	9.99	Decreasing	Male contraceptive screen [Motility]	65.81531187879519
W0002535	J04	04	J	VCL_median	45.80629686625037	3.157012314323323	50.12940611288278	4.952533580013708	14.393043936860249	RFM-004-129-2	2.5	Decreasing	Male contraceptive screen [Motility]	91.37610121113839
W0002535	J05	05	J	VCL_median	48.52707026611013	3.157012314323323	50.12940611288278	4.952533580013708	14.393043936860249	RFM-004-129-2	1.25	Decreasing	Male contraceptive screen [Motility]	96.80360097790812
W0002535	J06	06	J	VCL_median	53.30045880609477	3.157012314323323	50.12940611288278	4.952533580013708	14.393043936860249	RFM-004-129-2	0.373	Decreasing	Male contraceptive screen [Motility]	106.32573361446038
W0002535	J07	07	J	VCL_median	49.54797664890355	3.157012314323323	50.12940611288278	4.952533580013708	14.393043936860249	RFM-004-129-2	0.0932	Decreasing	Male contraceptive screen [Motility]	98.84014292395574
W0002535	J08	08	J	VCL_median	54.4244261714009	3.157012314323323	50.12940611288278	4.952533580013708	14.393043936860249	RFM-004-129-2	0.0466	Decreasing	Male contraceptive screen [Motility]	108.5678654338064
W0002535	J09	09	J	VCL_median	47.7636326476923	3.157012314323323	50.12940611288278	4.952533580013708	14.393043936860249	RFM-004-129-2	0.0139	Decreasing	Male contraceptive screen [Motility]	95.28066727967379
W0002535	J10	10	J	VCL_median	49.831968994375714	3.157012314323323	50.12940611288278	4.952533580013708	14.393043936860249	RFM-004-129-2	0.00346	Decreasing	Male contraceptive screen [Motility]	99.40666139583362
W0002535	K05	05	K	VCL_median	14.274813082041643	3.157012314323323	50.12940611288278	4.952533580013708	14.393043936860249	RFM-006-841-7	9.99	Decreasing	Male contraceptive screen [Motility]	28.475926983649526
W0002535	K06	06	K	VCL_median	33.320246065660456	3.157012314323323	50.12940611288278	4.952533580013708	14.393043936860249	RFM-006-841-7	2.5	Decreasing	Male contraceptive screen [Motility]	66.46846362119074
W0002535	K07	07	K	VCL_median	38.54646347577411	3.157012314323323	50.12940611288278	4.952533580013708	14.393043936860249	RFM-006-841-7	1.25	Decreasing	Male contraceptive screen [Motility]	76.8939160958223
W0002535	K08	08	K	VCL_median	52.33555717994151	3.157012314323323	50.12940611288278	4.952533580013708	14.393043936860249	RFM-006-841-7	0.373	Decreasing	Male contraceptive screen [Motility]	104.40091203572382
W0002535	K09	09	K	VCL_median	49.14114039985342	3.157012314323323	50.12940611288278	4.952533580013708	14.393043936860249	RFM-006-841-7	0.0932	Decreasing	Male contraceptive screen [Motility]	98.02857087354285
W0002535	K10	10	K	VCL_median	48.12336209147876	3.157012314323323	50.12940611288278	4.952533580013708	14.393043936860249	RFM-006-841-7	0.0466	Decreasing	Male contraceptive screen [Motility]	95.99826892645255
W0002535	K11	11	K	VCL_median	51.189813710369236	3.157012314323323	50.12940611288278	4.952533580013708	14.393043936860249	RFM-006-841-7	0.0139	Decreasing	Male contraceptive screen [Motility]	102.11534043530976
W0002535	K12	12	K	VCL_median	50.0399015314745	3.157012314323323	50.12940611288278	4.952533580013708	14.393043936860249	RFM-006-841-7	0.00346	Decreasing	Male contraceptive screen [Motility]	99.82145293880654
W0002535	N03	03	N	VCL_median	35.90419381009934	3.157012314323323	50.12940611288278	4.952533580013708	14.393043936860249	RFM-004-668-4	9.99	Decreasing	Male contraceptive screen [Motility]	71.62301849187938
W0002535	N04	04	N	VCL_median	43.66995185153013	3.157012314323323	50.12940611288278	4.952533580013708	14.393043936860249	RFM-004-668-4	2.5	Decreasing	Male contraceptive screen [Motility]	87.1144408796564
W0002535	N05	05	N	VCL_median	44.64817917326485	3.157012314323323	50.12940611288278	4.952533580013708	14.393043936860249	RFM-004-668-4	1.25	Decreasing	Male contraceptive screen [Motility]	89.06584505055744
W0002535	N06	06	N	VCL_median	46.703353177758636	3.157012314323323	50.12940611288278	4.952533580013708	14.393043936860249	RFM-004-668-4	0.373	Decreasing	Male contraceptive screen [Motility]	93.16558243796213
W0002535	N07	07	N	VCL_median	50.318226772739365	3.157012314323323	50.12940611288278	4.952533580013708	14.393043936860249	RFM-004-668-4	0.0932	Decreasing	Male contraceptive screen [Motility]	100.3766664608621
W0002535	N08	08	N	VCL_median	46.85564508424896	3.157012314323323	50.12940611288278	4.952533580013708	14.393043936860249	RFM-004-668-4	0.0466	Decreasing	Male contraceptive screen [Motility]	93.46937998574754
W0002535	N09	09	N	VCL_median	49.132112739456545	3.157012314323323	50.12940611288278	4.952533580013708	14.393043936860249	RFM-004-668-4	0.0139	Decreasing	Male contraceptive screen [Motility]	98.01056216149757
W0002535	N10	10	N	VCL_median	50.063153725967865	3.157012314323323	50.12940611288278	4.952533580013708	14.393043936860249	RFM-004-668-4	0.00346	Decreasing	Male contraceptive screen [Motility]	99.86783727944885
W0002535	P07	07	P	VCL_median	34.882359445241555	3.157012314323323	50.12940611288278	4.952533580013708	14.393043936860249	RFM-005-517-4	9.99	Decreasing	Male contraceptive screen [Motility]	69.58462537276523
W0002535	P08	08	P	VCL_median	41.41980447069458	3.157012314323323	50.12940611288278	4.952533580013708	14.393043936860249	RFM-005-517-4	2.5	Decreasing	Male contraceptive screen [Motility]	82.62576336417055
W0002535	P09	09	P	VCL_median	41.37258385757298	3.157012314323323	50.12940611288278	4.952533580013708	14.393043936860249	RFM-005-517-4	1.25	Decreasing	Male contraceptive screen [Motility]	82.53156593239714
W0002535	P10	10	P	VCL_median	45.46835848492796	3.157012314323323	50.12940611288278	4.952533580013708	14.393043936860249	RFM-005-517-4	0.373	Decreasing	Male contraceptive screen [Motility]	90.70196918459607
W0002535	P11	11	P	VCL_median	47.47531016086434	3.157012314323323	50.12940611288278	4.952533580013708	14.393043936860249	RFM-005-517-4	0.0932	Decreasing	Male contraceptive screen [Motility]	94.70551088109467
W0002535	P12	12	P	VCL_median	45.56829292664869	3.157012314323323	50.12940611288278	4.952533580013708	14.393043936860249	RFM-005-517-4	0.0466	Decreasing	Male contraceptive screen [Motility]	90.90132211827274
W0002535	P13	13	P	VCL_median	48.76521158651934	3.157012314323323	50.12940611288278	4.952533580013708	14.393043936860249	RFM-005-517-4	0.0139	Decreasing	Male contraceptive screen [Motility]	97.27865412310788
W0002535	P14	14	P	VCL_median	47.15435202830744	3.157012314323323	50.12940611288278	4.952533580013708	14.393043936860249	RFM-005-517-4	0.00346	Decreasing	Male contraceptive screen [Motility]	94.06525168505681
W0002537	A01	01	A	VCL_median	62.01714374556259	2.1669091859474445	66.89299356875392	5.352600079746697	11.731067482297496	RFM-009-231-9	9.99	Decreasing	Male contraceptive screen [Motility]	92.71097081612915
W0002537	A02	02	A	VCL_median	64.95280126903582	2.1669091859474445	66.89299356875392	5.352600079746697	11.731067482297496	RFM-009-231-9	2.5	Decreasing	Male contraceptive screen [Motility]	97.09955827029337
W0002537	A03	03	A	VCL_median	66.71998083826485	2.1669091859474445	66.89299356875392	5.352600079746697	11.731067482297496	RFM-009-231-9	1.25	Decreasing	Male contraceptive screen [Motility]	99.74135896562731
W0002537	A04	04	A	VCL_median	70.18241277353182	2.1669091859474445	66.89299356875392	5.352600079746697	11.731067482297496	RFM-009-231-9	0.373	Decreasing	Male contraceptive screen [Motility]	104.91743459110852
W0002537	A05	05	A	VCL_median	71.30872725294641	2.1669091859474445	66.89299356875392	5.352600079746697	11.731067482297496	RFM-009-231-9	0.0932	Decreasing	Male contraceptive screen [Motility]	106.60119012263058
W0002537	A06	06	A	VCL_median	69.91652166880367	2.1669091859474445	66.89299356875392	5.352600079746697	11.731067482297496	RFM-009-231-9	0.0466	Decreasing	Male contraceptive screen [Motility]	104.51994736480452
W0002537	A07	07	A	VCL_median	69.19415003480717	2.1669091859474445	66.89299356875392	5.352600079746697	11.731067482297496	RFM-009-231-9	0.0139	Decreasing	Male contraceptive screen [Motility]	103.44005604067945
W0002537	A08	08	A	VCL_median	70.30028892974661	2.1669091859474445	66.89299356875392	5.352600079746697	11.731067482297496	RFM-009-231-9	0.00346	Decreasing	Male contraceptive screen [Motility]	105.09365058911679
W0002537	A17	17	A	VCL_median	58.26027230537805	2.1669091859474445	66.89299356875392	5.352600079746697	11.731067482297496	RFM-007-451-1	9.99	Decreasing	Male contraceptive screen [Motility]	87.09473025078032
W0002537	A18	18	A	VCL_median	64.53364388784655	2.1669091859474445	66.89299356875392	5.352600079746697	11.731067482297496	RFM-007-451-1	2.5	Decreasing	Male contraceptive screen [Motility]	96.47294947492163
W0002537	A19	19	A	VCL_median	66.91064833918529	2.1669091859474445	66.89299356875392	5.352600079746697	11.731067482297496	RFM-007-451-1	1.25	Decreasing	Male contraceptive screen [Motility]	100.02639255546728
W0002537	A20	20	A	VCL_median	66.27210165828646	2.1669091859474445	66.89299356875392	5.352600079746697	11.731067482297496	RFM-007-451-1	0.373	Decreasing	Male contraceptive screen [Motility]	99.07181323881208
W0002537	A21	21	A	VCL_median	67.18213284981388	2.1669091859474445	66.89299356875392	5.352600079746697	11.731067482297496	RFM-007-451-1	0.0932	Decreasing	Male contraceptive screen [Motility]	100.43224150338372
W0002537	A22	22	A	VCL_median	71.45452126778588	2.1669091859474445	66.89299356875392	5.352600079746697	11.731067482297496	RFM-007-451-1	0.0466	Decreasing	Male contraceptive screen [Motility]	106.8191412219331
W0002537	B01	01	B	VCL_median	70.88510121270278	2.1669091859474445	66.89299356875392	5.352600079746697	11.731067482297496	RFM-007-451-1	0.0139	Decreasing	Male contraceptive screen [Motility]	105.96790101768386
W0002537	B02	02	B	VCL_median	71.50451146882335	2.1669091859474445	66.89299356875392	5.352600079746697	11.731067482297496	RFM-007-451-1	0.00346	Decreasing	Male contraceptive screen [Motility]	106.89387281693354
W0002537	B03	03	B	VCL_median	46.34045481954904	2.1669091859474445	66.89299356875392	5.352600079746697	11.731067482297496	RFM-009-109-8	9.99	Decreasing	Male contraceptive screen [Motility]	69.27549859451186
W0002537	B04	04	B	VCL_median	58.135559215924914	2.1669091859474445	66.89299356875392	5.352600079746697	11.731067482297496	RFM-009-109-8	2.5	Decreasing	Male contraceptive screen [Motility]	86.90829355121035
W0002537	B05	05	B	VCL_median	65.18635578759637	2.1669091859474445	66.89299356875392	5.352600079746697	11.731067482297496	RFM-009-109-8	1.25	Decreasing	Male contraceptive screen [Motility]	97.44870472958661
W0002537	B06	06	B	VCL_median	71.74445361583528	2.1669091859474445	66.89299356875392	5.352600079746697	11.731067482297496	RFM-009-109-8	0.373	Decreasing	Male contraceptive screen [Motility]	107.2525683008863
W0002537	B07	07	B	VCL_median	72.21872914474392	2.1669091859474445	66.89299356875392	5.352600079746697	11.731067482297496	RFM-009-109-8	0.0932	Decreasing	Male contraceptive screen [Motility]	107.96157458630715
W0002537	B08	08	B	VCL_median	67.85907744460742	2.1669091859474445	66.89299356875392	5.352600079746697	11.731067482297496	RFM-009-109-8	0.0466	Decreasing	Male contraceptive screen [Motility]	101.44422281664005
W0002537	B09	09	B	VCL_median	72.01401622067381	2.1669091859474445	66.89299356875392	5.352600079746697	11.731067482297496	RFM-009-109-8	0.0139	Decreasing	Male contraceptive screen [Motility]	107.65554414403118
W0002537	B10	10	B	VCL_median	69.69519643046904	2.1669091859474445	66.89299356875392	5.352600079746697	11.731067482297496	RFM-009-109-8	0.00346	Decreasing	Male contraceptive screen [Motility]	104.18908276071537
W0002537	D07	07	D	VCL_median	66.47496195179176	2.1669091859474445	66.89299356875392	5.352600079746697	11.731067482297496	RFM-007-125-0	9.99	Decreasing	Male contraceptive screen [Motility]	99.3750741375739
W0002537	D08	08	D	VCL_median	61.476541853445646	2.1669091859474445	66.89299356875392	5.352600079746697	11.731067482297496	RFM-007-125-0	2.5	Decreasing	Male contraceptive screen [Motility]	91.90281160052862
W0002537	D09	09	D	VCL_median	64.53801075853157	2.1669091859474445	66.89299356875392	5.352600079746697	11.731067482297496	RFM-007-125-0	1.25	Decreasing	Male contraceptive screen [Motility]	96.47947761853138
W0002537	D10	10	D	VCL_median	69.69883256165843	2.1669091859474445	66.89299356875392	5.352600079746697	11.731067482297496	RFM-007-125-0	0.373	Decreasing	Male contraceptive screen [Motility]	104.19451850367649
W0002537	D11	11	D	VCL_median	69.09321144284135	2.1669091859474445	66.89299356875392	5.352600079746697	11.731067482297496	RFM-007-125-0	0.0932	Decreasing	Male contraceptive screen [Motility]	103.28916042877646
W0002537	D12	12	D	VCL_median	69.63628396209367	2.1669091859474445	66.89299356875392	5.352600079746697	11.731067482297496	RFM-007-125-0	0.0466	Decreasing	Male contraceptive screen [Motility]	104.10101304633667
W0002537	D13	13	D	VCL_median	71.27374777550293	2.1669091859474445	66.89299356875392	5.352600079746697	11.731067482297496	RFM-007-125-0	0.0139	Decreasing	Male contraceptive screen [Motility]	106.5488984317115
W0002537	D14	14	D	VCL_median	71.97805597897997	2.1669091859474445	66.89299356875392	5.352600079746697	11.731067482297496	RFM-007-125-0	0.00346	Decreasing	Male contraceptive screen [Motility]	107.60178628423844
W0002537	E17	17	E	VCL_median	52.494471114240206	2.1669091859474445	66.89299356875392	5.352600079746697	11.731067482297496	RFM-007-307-4	9.99	Decreasing	Male contraceptive screen [Motility]	78.47529063007977
W0002537	E18	18	E	VCL_median	63.54691376988865	2.1669091859474445	66.89299356875392	5.352600079746697	11.731067482297496	RFM-007-307-4	2.5	Decreasing	Male contraceptive screen [Motility]	94.99786207739962
W0002537	E19	19	E	VCL_median	66.57640807726051	2.1669091859474445	66.89299356875392	5.352600079746697	11.731067482297496	RFM-007-307-4	1.25	Decreasing	Male contraceptive screen [Motility]	99.526728473935
W0002537	E20	20	E	VCL_median	68.01401834910195	2.1669091859474445	66.89299356875392	5.352600079746697	11.731067482297496	RFM-007-307-4	0.373	Decreasing	Male contraceptive screen [Motility]	101.67584782881008
W0002537	E21	21	E	VCL_median	66.56224463363313	2.1669091859474445	66.89299356875392	5.352600079746697	11.731067482297496	RFM-007-307-4	0.0932	Decreasing	Male contraceptive screen [Motility]	99.50555518975116
W0002537	E22	22	E	VCL_median	67.88184257825102	2.1669091859474445	66.89299356875392	5.352600079746697	11.731067482297496	RFM-007-307-4	0.0466	Decreasing	Male contraceptive screen [Motility]	101.47825498118983
W0002537	F01	01	F	VCL_median	67.52037128436726	2.1669091859474445	66.89299356875392	5.352600079746697	11.731067482297496	RFM-007-307-4	0.0139	Decreasing	Male contraceptive screen [Motility]	100.93788255263011
W0002537	F02	02	F	VCL_median	67.9510532807766	2.1669091859474445	66.89299356875392	5.352600079746697	11.731067482297496	RFM-007-307-4	0.00346	Decreasing	Male contraceptive screen [Motility]	101.58171978196071
W0002537	F03	03	F	VCL_median	58.402544747746475	2.1669091859474445	66.89299356875392	5.352600079746697	11.731067482297496	RFM-008-567-6	9.99	Decreasing	Male contraceptive screen [Motility]	87.30741686379935
W0002537	F04	04	F	VCL_median	63.95693853767182	2.1669091859474445	66.89299356875392	5.352600079746697	11.731067482297496	RFM-008-567-6	2.5	Decreasing	Male contraceptive screen [Motility]	95.61081830182354
W0002537	F05	05	F	VCL_median	64.11404891246866	2.1669091859474445	66.89299356875392	5.352600079746697	11.731067482297496	RFM-008-567-6	1.25	Decreasing	Male contraceptive screen [Motility]	95.84568650911248
W0002537	F06	06	F	VCL_median	65.88724852197095	2.1669091859474445	66.89299356875392	5.352600079746697	11.731067482297496	RFM-008-567-6	0.373	Decreasing	Male contraceptive screen [Motility]	98.496486712395
W0002537	F07	07	F	VCL_median	66.4847417028857	2.1669091859474445	66.89299356875392	5.352600079746697	11.731067482297496	RFM-008-567-6	0.0932	Decreasing	Male contraceptive screen [Motility]	99.38969413074837
W0002537	F08	08	F	VCL_median	67.95705118222725	2.1669091859474445	66.89299356875392	5.352600079746697	11.731067482297496	RFM-008-567-6	0.0466	Decreasing	Male contraceptive screen [Motility]	101.59068619403267
W0002537	F09	09	F	VCL_median	70.03974830123953	2.1669091859474445	66.89299356875392	5.352600079746697	11.731067482297496	RFM-008-567-6	0.0139	Decreasing	Male contraceptive screen [Motility]	104.70416192280483
W0002537	F10	10	F	VCL_median	71.92210641361471	2.1669091859474445	66.89299356875392	5.352600079746697	11.731067482297496	RFM-008-567-6	0.00346	Decreasing	Male contraceptive screen [Motility]	107.5181458872696
W0002537	F11	11	F	VCL_median	44.03334330424971	2.1669091859474445	66.89299356875392	5.352600079746697	11.731067482297496	RFM-007-141-0	9.99	Decreasing	Male contraceptive screen [Motility]	65.82654020258695
W0002537	F12	12	F	VCL_median	57.99334197235015	2.1669091859474445	66.89299356875392	5.352600079746697	11.731067482297496	RFM-007-141-0	2.5	Decreasing	Male contraceptive screen [Motility]	86.69568945624097
W0002537	F13	13	F	VCL_median	59.372607407907765	2.1669091859474445	66.89299356875392	5.352600079746697	11.731067482297496	RFM-007-141-0	1.25	Decreasing	Male contraceptive screen [Motility]	88.75758766407044
W0002537	F14	14	F	VCL_median	68.59637048923368	2.1669091859474445	66.89299356875392	5.352600079746697	11.731067482297496	RFM-007-141-0	0.373	Decreasing	Male contraceptive screen [Motility]	102.54642052867464
W0002537	F15	15	F	VCL_median	69.19826122157158	2.1669091859474445	66.89299356875392	5.352600079746697	11.731067482297496	RFM-007-141-0	0.0932	Decreasing	Male contraceptive screen [Motility]	103.44620195603633
W0002537	F16	16	F	VCL_median	70.34965522250103	2.1669091859474445	66.89299356875392	5.352600079746697	11.731067482297496	RFM-007-141-0	0.0466	Decreasing	Male contraceptive screen [Motility]	105.16744948810563
W0002537	F17	17	F	VCL_median	70.47544107997967	2.1669091859474445	66.89299356875392	5.352600079746697	11.731067482297496	RFM-007-141-0	0.0139	Decreasing	Male contraceptive screen [Motility]	105.35548989528125
W0002537	F18	18	F	VCL_median	69.93311363143268	2.1669091859474445	66.89299356875392	5.352600079746697	11.731067482297496	RFM-007-141-0	0.00346	Decreasing	Male contraceptive screen [Motility]	104.5447511024515
W0002537	G05	05	G	VCL_median	57.050525038407706	2.1669091859474445	66.89299356875392	5.352600079746697	11.731067482297496	RFM-007-131-8	9.99	Decreasing	Male contraceptive screen [Motility]	85.28624896981187
W0002537	G06	06	G	VCL_median	61.96860362529084	2.1669091859474445	66.89299356875392	5.352600079746697	11.731067482297496	RFM-007-131-8	2.5	Decreasing	Male contraceptive screen [Motility]	92.63840698293507
W0002537	G07	07	G	VCL_median	64.72641214823062	2.1669091859474445	66.89299356875392	5.352600079746697	11.731067482297496	RFM-007-131-8	1.25	Decreasing	Male contraceptive screen [Motility]	96.76112354233864
W0002537	G08	08	G	VCL_median	64.8749888215697	2.1669091859474445	66.89299356875392	5.352600079746697	11.731067482297496	RFM-007-131-8	0.373	Decreasing	Male contraceptive screen [Motility]	96.98323450704882
W0002537	G09	09	G	VCL_median	67.38896016948333	2.1669091859474445	66.89299356875392	5.352600079746697	11.731067482297496	RFM-007-131-8	0.0932	Decreasing	Male contraceptive screen [Motility]	100.7414328082352
W0002537	G10	10	G	VCL_median	65.31033854650005	2.1669091859474445	66.89299356875392	5.352600079746697	11.731067482297496	RFM-007-131-8	0.0466	Decreasing	Male contraceptive screen [Motility]	97.63404963985177
W0002537	G11	11	G	VCL_median	66.64353589129408	2.1669091859474445	66.89299356875392	5.352600079746697	11.731067482297496	RFM-007-131-8	0.0139	Decreasing	Male contraceptive screen [Motility]	99.62707951288883
W0002537	G12	12	G	VCL_median	70.32816367248485	2.1669091859474445	66.89299356875392	5.352600079746697	11.731067482297496	RFM-007-131-8	0.00346	Decreasing	Male contraceptive screen [Motility]	105.13532123539993
W0002537	G21	21	G	VCL_median	54.59770790819675	2.1669091859474445	66.89299356875392	5.352600079746697	11.731067482297496	RFM-007-403-3	9.99	Decreasing	Male contraceptive screen [Motility]	81.61947162983545
W0002537	G22	22	G	VCL_median	65.63760965579763	2.1669091859474445	66.89299356875392	5.352600079746697	11.731067482297496	RFM-007-403-3	2.5	Decreasing	Male contraceptive screen [Motility]	98.12329536176911
W0002537	H01	01	H	VCL_median	65.82047349555545	2.1669091859474445	66.89299356875392	5.352600079746697	11.731067482297496	RFM-007-403-3	1.25	Decreasing	Male contraceptive screen [Motility]	98.39666306442673
W0002537	H02	02	H	VCL_median	66.24331051387527	2.1669091859474445	66.89299356875392	5.352600079746697	11.731067482297496	RFM-007-403-3	0.373	Decreasing	Male contraceptive screen [Motility]	99.02877264087323
W0002537	H03	03	H	VCL_median	67.48943597376234	2.1669091859474445	66.89299356875392	5.352600079746697	11.731067482297496	RFM-007-403-3	0.0932	Decreasing	Male contraceptive screen [Motility]	100.8916365873137
W0002537	H04	04	H	VCL_median	68.26169111411309	2.1669091859474445	66.89299356875392	5.352600079746697	11.731067482297496	RFM-007-403-3	0.0466	Decreasing	Male contraceptive screen [Motility]	102.04610000590331
W0002537	H05	05	H	VCL_median	70.01181522610817	2.1669091859474445	66.89299356875392	5.352600079746697	11.731067482297496	RFM-007-403-3	0.0139	Decreasing	Male contraceptive screen [Motility]	104.66240407397625
W0002537	H06	06	H	VCL_median	66.26906004701313	2.1669091859474445	66.89299356875392	5.352600079746697	11.731067482297496	RFM-007-403-3	0.00346	Decreasing	Male contraceptive screen [Motility]	99.06726625846173
W0002537	J03	03	J	VCL_median	36.561124164796915	2.1669091859474445	66.89299356875392	5.352600079746697	11.731067482297496	RFM-004-129-2	9.99	Decreasing	Male contraceptive screen [Motility]	54.656133945057604
W0002537	J04	04	J	VCL_median	59.930622851322724	2.1669091859474445	66.89299356875392	5.352600079746697	11.731067482297496	RFM-004-129-2	2.5	Decreasing	Male contraceptive screen [Motility]	89.59177883065566
W0002537	J05	05	J	VCL_median	62.795048286725404	2.1669091859474445	66.89299356875392	5.352600079746697	11.731067482297496	RFM-004-129-2	1.25	Decreasing	Male contraceptive screen [Motility]	93.87387966451737
W0002537	J06	06	J	VCL_median	65.64652625095546	2.1669091859474445	66.89299356875392	5.352600079746697	11.731067482297496	RFM-004-129-2	0.373	Decreasing	Male contraceptive screen [Motility]	98.13662500166431
W0002537	J07	07	J	VCL_median	66.44602988368146	2.1669091859474445	66.89299356875392	5.352600079746697	11.731067482297496	RFM-004-129-2	0.0932	Decreasing	Male contraceptive screen [Motility]	99.33182286929188
W0002537	J08	08	J	VCL_median	66.66076197063843	2.1669091859474445	66.89299356875392	5.352600079746697	11.731067482297496	RFM-004-129-2	0.0466	Decreasing	Male contraceptive screen [Motility]	99.65283120738677
W0002537	J09	09	J	VCL_median	67.59248394519585	2.1669091859474445	66.89299356875392	5.352600079746697	11.731067482297496	RFM-004-129-2	0.0139	Decreasing	Male contraceptive screen [Motility]	101.04568556305225
W0002537	J10	10	J	VCL_median	64.63032735684236	2.1669091859474445	66.89299356875392	5.352600079746697	11.731067482297496	RFM-004-129-2	0.00346	Decreasing	Male contraceptive screen [Motility]	96.61748399765374
W0002537	K05	05	K	VCL_median	4.775695226131404	2.1669091859474445	66.89299356875392	5.352600079746697	11.731067482297496	RFM-006-841-7	9.99	Decreasing	Male contraceptive screen [Motility]	7.139305585453956
W0002537	K06	06	K	VCL_median	10.355568287356828	2.1669091859474445	66.89299356875392	5.352600079746697	11.731067482297496	RFM-006-841-7	2.5	Decreasing	Male contraceptive screen [Motility]	15.480796619922794
W0002537	K07	07	K	VCL_median	28.115387207807686	2.1669091859474445	66.89299356875392	5.352600079746697	11.731067482297496	RFM-006-841-7	1.25	Decreasing	Male contraceptive screen [Motility]	42.03039168655256
W0002537	K08	08	K	VCL_median	53.384144263849095	2.1669091859474445	66.89299356875392	5.352600079746697	11.731067482297496	RFM-006-841-7	0.373	Decreasing	Male contraceptive screen [Motility]	79.80528515139605
W0002537	K09	09	K	VCL_median	60.550102007360266	2.1669091859474445	66.89299356875392	5.352600079746697	11.731067482297496	RFM-006-841-7	0.0932	Decreasing	Male contraceptive screen [Motility]	90.51785363010507
W0002537	K10	10	K	VCL_median	65.35942070618948	2.1669091859474445	66.89299356875392	5.352600079746697	11.731067482297496	RFM-006-841-7	0.0466	Decreasing	Male contraceptive screen [Motility]	97.70742378125415
W0002537	K11	11	K	VCL_median	70.17580381613178	2.1669091859474445	66.89299356875392	5.352600079746697	11.731067482297496	RFM-006-841-7	0.0139	Decreasing	Male contraceptive screen [Motility]	104.90755469629822
W0002537	K12	12	K	VCL_median	65.3000358565117	2.1669091859474445	66.89299356875392	5.352600079746697	11.731067482297496	RFM-006-841-7	0.00346	Decreasing	Male contraceptive screen [Motility]	97.61864789231632
W0002537	N03	03	N	VCL_median	54.74182527780136	2.1669091859474445	66.89299356875392	5.352600079746697	11.731067482297496	RFM-004-668-4	9.99	Decreasing	Male contraceptive screen [Motility]	81.83491627047106
W0002537	N04	04	N	VCL_median	62.28668607606008	2.1669091859474445	66.89299356875392	5.352600079746697	11.731067482297496	RFM-004-668-4	2.5	Decreasing	Male contraceptive screen [Motility]	93.11391635065728
W0002537	N05	05	N	VCL_median	61.102222447408266	2.1669091859474445	66.89299356875392	5.352600079746697	11.731067482297496	RFM-004-668-4	1.25	Decreasing	Male contraceptive screen [Motility]	91.34323220952312
W0002537	N06	06	N	VCL_median	66.6956940299507	2.1669091859474445	66.89299356875392	5.352600079746697	11.731067482297496	RFM-004-668-4	0.373	Decreasing	Male contraceptive screen [Motility]	99.70505201176198
W0002537	N07	07	N	VCL_median	66.84548354187041	2.1669091859474445	66.89299356875392	5.352600079746697	11.731067482297496	RFM-004-668-4	0.0932	Decreasing	Male contraceptive screen [Motility]	99.92897607903481
W0002537	N08	08	N	VCL_median	68.5891135386239	2.1669091859474445	66.89299356875392	5.352600079746697	11.731067482297496	RFM-004-668-4	0.0466	Decreasing	Male contraceptive screen [Motility]	102.53557193269678
W0002537	N09	09	N	VCL_median	65.89158760953913	2.1669091859474445	66.89299356875392	5.352600079746697	11.731067482297496	RFM-004-668-4	0.0139	Decreasing	Male contraceptive screen [Motility]	98.50297332233228
W0002537	N10	10	N	VCL_median	66.94875924406469	2.1669091859474445	66.89299356875392	5.352600079746697	11.731067482297496	RFM-004-668-4	0.00346	Decreasing	Male contraceptive screen [Motility]	100.08336549515226
W0002537	P07	07	P	VCL_median	66.77049450819591	2.1669091859474445	66.89299356875392	5.352600079746697	11.731067482297496	RFM-005-517-4	9.99	Decreasing	Male contraceptive screen [Motility]	99.81687310729768
W0002537	P08	08	P	VCL_median	55.310659422696304	2.1669091859474445	66.89299356875392	5.352600079746697	11.731067482297496	RFM-005-517-4	2.5	Decreasing	Male contraceptive screen [Motility]	82.68528058300595
W0002537	P09	09	P	VCL_median	54.04282771155856	2.1669091859474445	66.89299356875392	5.352600079746697	11.731067482297496	RFM-005-517-4	1.25	Decreasing	Male contraceptive screen [Motility]	80.78996742164377
W0002537	P10	10	P	VCL_median	58.05688540096094	2.1669091859474445	66.89299356875392	5.352600079746697	11.731067482297496	RFM-005-517-4	0.373	Decreasing	Male contraceptive screen [Motility]	86.79068210826735
W0002537	P11	11	P	VCL_median	62.444169851547706	2.1669091859474445	66.89299356875392	5.352600079746697	11.731067482297496	RFM-005-517-4	0.0932	Decreasing	Male contraceptive screen [Motility]	93.34934276392694
W0002537	P12	12	P	VCL_median	59.39083804939372	2.1669091859474445	66.89299356875392	5.352600079746697	11.731067482297496	RFM-005-517-4	0.0466	Decreasing	Male contraceptive screen [Motility]	88.7848411035016
W0002537	P13	13	P	VCL_median	65.36835870250057	2.1669091859474445	66.89299356875392	5.352600079746697	11.731067482297496	RFM-005-517-4	0.0139	Decreasing	Male contraceptive screen [Motility]	97.72078541426569
W0002537	P14	14	P	VCL_median	65.12676616105716	2.1669091859474445	66.89299356875392	5.352600079746697	11.731067482297496	RFM-005-517-4	0.00346	Decreasing	Male contraceptive screen [Motility]	97.35962271462498
W0002539	A01	01	A	VCL_median	63.8708030646797	2.5231243431893446	68.85113415306253	2.420193415507091	10.017397261116095	RFM-008-929-2	9.99	Decreasing	Male contraceptive screen [Motility]	92.76652280366059
W0002539	A02	02	A	VCL_median	69.55836876759733	2.5231243431893446	68.85113415306253	2.420193415507091	10.017397261116095	RFM-008-929-2	2.5	Decreasing	Male contraceptive screen [Motility]	101.02719384834322
W0002539	A03	03	A	VCL_median	69.76971513537141	2.5231243431893446	68.85113415306253	2.420193415507091	10.017397261116095	RFM-008-929-2	1.25	Decreasing	Male contraceptive screen [Motility]	101.33415519382265
W0002539	A04	04	A	VCL_median	74.09738841776783	2.5231243431893446	68.85113415306253	2.420193415507091	10.017397261116095	RFM-008-929-2	0.373	Decreasing	Male contraceptive screen [Motility]	107.61970638427303
W0002539	A05	05	A	VCL_median	72.11110617095746	2.5231243431893446	68.85113415306253	2.420193415507091	10.017397261116095	RFM-008-929-2	0.0932	Decreasing	Male contraceptive screen [Motility]	104.73481237164184
W0002539	A06	06	A	VCL_median	75.4008639893952	2.5231243431893446	68.85113415306253	2.420193415507091	10.017397261116095	RFM-008-929-2	0.0466	Decreasing	Male contraceptive screen [Motility]	109.51288590507748
W0002539	A07	07	A	VCL_median	71.09564522290614	2.5231243431893446	68.85113415306253	2.420193415507091	10.017397261116095	RFM-008-929-2	0.0139	Decreasing	Male contraceptive screen [Motility]	103.25994785336994
W0002539	A08	08	A	VCL_median	71.54195047715484	2.5231243431893446	68.85113415306253	2.420193415507091	10.017397261116095	RFM-008-929-2	0.00346	Decreasing	Male contraceptive screen [Motility]	103.90816557663433
W0002539	B11	11	B	VCL_median	61.30869963485986	2.5231243431893446	68.85113415306253	2.420193415507091	10.017397261116095	RFM-009-180-5	9.99	Decreasing	Male contraceptive screen [Motility]	89.04530098017685
W0002539	B12	12	B	VCL_median	69.52876579442324	2.5231243431893446	68.85113415306253	2.420193415507091	10.017397261116095	RFM-009-180-5	2.5	Decreasing	Male contraceptive screen [Motility]	100.98419822664688
W0002539	B13	13	B	VCL_median	70.11570460640515	2.5231243431893446	68.85113415306253	2.420193415507091	10.017397261116095	RFM-009-180-5	1.25	Decreasing	Male contraceptive screen [Motility]	101.83667338076283
W0002539	B14	14	B	VCL_median	70.81077752823445	2.5231243431893446	68.85113415306253	2.420193415507091	10.017397261116095	RFM-009-180-5	0.373	Decreasing	Male contraceptive screen [Motility]	102.84620347838491
W0002539	B15	15	B	VCL_median	73.37875314288871	2.5231243431893446	68.85113415306253	2.420193415507091	10.017397261116095	RFM-009-180-5	0.0932	Decreasing	Male contraceptive screen [Motility]	106.57595411538298
W0002539	B16	16	B	VCL_median	71.53399391076539	2.5231243431893446	68.85113415306253	2.420193415507091	10.017397261116095	RFM-009-180-5	0.0466	Decreasing	Male contraceptive screen [Motility]	103.89660938879904
W0002539	B17	17	B	VCL_median	72.94849313695634	2.5231243431893446	68.85113415306253	2.420193415507091	10.017397261116095	RFM-009-180-5	0.0139	Decreasing	Male contraceptive screen [Motility]	105.95104065357151
W0002539	B18	18	B	VCL_median	70.57702181345397	2.5231243431893446	68.85113415306253	2.420193415507091	10.017397261116095	RFM-009-180-5	0.00346	Decreasing	Male contraceptive screen [Motility]	102.50669459787638
W0002539	C13	13	C	VCL_median	3.727002668579333	2.5231243431893446	68.85113415306253	2.420193415507091	10.017397261116095	RFM-007-885-3	9.99	Decreasing	Male contraceptive screen [Motility]	5.4131318451397705
W0002539	C14	14	C	VCL_median	4.647140764671425	2.5231243431893446	68.85113415306253	2.420193415507091	10.017397261116095	RFM-007-885-3	2.5	Decreasing	Male contraceptive screen [Motility]	6.749548604879036
W0002539	C15	15	C	VCL_median	8.257517495370088	2.5231243431893446	68.85113415306253	2.420193415507091	10.017397261116095	RFM-007-885-3	1.25	Decreasing	Male contraceptive screen [Motility]	11.993291899902262
W0002539	C16	16	C	VCL_median	46.405336913355654	2.5231243431893446	68.85113415306253	2.420193415507091	10.017397261116095	RFM-007-885-3	0.373	Decreasing	Male contraceptive screen [Motility]	67.39952432764903
W0002539	C17	17	C	VCL_median	68.41774130135462	2.5231243431893446	68.85113415306253	2.420193415507091	10.017397261116095	RFM-007-885-3	0.0932	Decreasing	Male contraceptive screen [Motility]	99.37053636510267
W0002539	C18	18	C	VCL_median	67.14340885071121	2.5231243431893446	68.85113415306253	2.420193415507091	10.017397261116095	RFM-007-885-3	0.0466	Decreasing	Male contraceptive screen [Motility]	97.51968457258106
W0002539	C19	19	C	VCL_median	70.72948274065094	2.5231243431893446	68.85113415306253	2.420193415507091	10.017397261116095	RFM-007-885-3	0.0139	Decreasing	Male contraceptive screen [Motility]	102.72813020539743
W0002539	C20	20	C	VCL_median	69.11202218812055	2.5231243431893446	68.85113415306253	2.420193415507091	10.017397261116095	RFM-007-885-3	0.00346	Decreasing	Male contraceptive screen [Motility]	100.37891610394978
W0002539	E20	20	E	VCL_median	64.83455411924479	2.5231243431893446	68.85113415306253	2.420193415507091	10.017397261116095	RFM-000-926-7	0.373	Decreasing	Male contraceptive screen [Motility]	94.16628341242934
W0002539	E21	21	E	VCL_median	67.84596252561532	2.5231243431893446	68.85113415306253	2.420193415507091	10.017397261116095	RFM-000-926-7	0.0932	Decreasing	Male contraceptive screen [Motility]	98.5400797825456
W0002539	E22	22	E	VCL_median	68.49971223480716	2.5231243431893446	68.85113415306253	2.420193415507091	10.017397261116095	RFM-000-926-7	0.0466	Decreasing	Male contraceptive screen [Motility]	99.48959167836782
W0002539	F01	01	F	VCL_median	70.49733899318599	2.5231243431893446	68.85113415306253	2.420193415507091	10.017397261116095	RFM-000-926-7	0.0139	Decreasing	Male contraceptive screen [Motility]	102.39096256056406
W0002539	F02	02	F	VCL_median	68.24443920357267	2.5231243431893446	68.85113415306253	2.420193415507091	10.017397261116095	RFM-000-926-7	0.00346	Decreasing	Male contraceptive screen [Motility]	99.1188308559433
W0002539	F14	14	F	VCL_median	70.6113132386395	2.5231243431893446	68.85113415306253	2.420193415507091	10.017397261116095	RFM-000-224-4	0.373	Decreasing	Male contraceptive screen [Motility]	102.55649976900006
W0002539	F15	15	F	VCL_median	71.12466478036993	2.5231243431893446	68.85113415306253	2.420193415507091	10.017397261116095	RFM-000-224-4	0.0932	Decreasing	Male contraceptive screen [Motility]	103.30209611689638
W0002539	F16	16	F	VCL_median	72.06204859039406	2.5231243431893446	68.85113415306253	2.420193415507091	10.017397261116095	RFM-000-224-4	0.0466	Decreasing	Male contraceptive screen [Motility]	104.66356070503262
W0002539	F17	17	F	VCL_median	67.12572152541385	2.5231243431893446	68.85113415306253	2.420193415507091	10.017397261116095	RFM-000-224-4	0.0139	Decreasing	Male contraceptive screen [Motility]	97.49399534390686
W0002539	F18	18	F	VCL_median	67.68193870324069	2.5231243431893446	68.85113415306253	2.420193415507091	10.017397261116095	RFM-000-224-4	0.00346	Decreasing	Male contraceptive screen [Motility]	98.30185012316194
W0002539	G05	05	G	VCL_median	48.039459454750045	2.5231243431893446	68.85113415306253	2.420193415507091	10.017397261116095	RFM-004-547-6	9.99	Decreasing	Male contraceptive screen [Motility]	69.77293845000987
W0002539	G06	06	G	VCL_median	58.485721847404804	2.5231243431893446	68.85113415306253	2.420193415507091	10.017397261116095	RFM-004-547-6	2.5	Decreasing	Male contraceptive screen [Motility]	84.94518291795391
W0002539	G07	07	G	VCL_median	61.60294858838814	2.5231243431893446	68.85113415306253	2.420193415507091	10.017397261116095	RFM-004-547-6	1.25	Decreasing	Male contraceptive screen [Motility]	89.47267077901579
W0002539	G13	13	G	VCL_median	57.51998806173528	2.5231243431893446	68.85113415306253	2.420193415507091	10.017397261116095	RFM-006-009-3	9.99	Decreasing	Male contraceptive screen [Motility]	83.54254257288333
W0002539	G14	14	G	VCL_median	69.30829522847233	2.5231243431893446	68.85113415306253	2.420193415507091	10.017397261116095	RFM-006-009-3	2.5	Decreasing	Male contraceptive screen [Motility]	100.6639848145326
W0002539	G15	15	G	VCL_median	69.52768631825464	2.5231243431893446	68.85113415306253	2.420193415507091	10.017397261116095	RFM-006-009-3	1.25	Decreasing	Male contraceptive screen [Motility]	100.98263038585256
W0002539	H07	07	H	VCL_median	39.46616061089607	2.5231243431893446	68.85113415306253	2.420193415507091	10.017397261116095	RFM-004-705-2	9.99	Decreasing	Male contraceptive screen [Motility]	57.321002909202754
W0002539	H08	08	H	VCL_median	57.89305926933406	2.5231243431893446	68.85113415306253	2.420193415507091	10.017397261116095	RFM-004-705-2	2.5	Decreasing	Male contraceptive screen [Motility]	84.08439451503058
W0002539	H09	09	H	VCL_median	63.01457598627107	2.5231243431893446	68.85113415306253	2.420193415507091	10.017397261116095	RFM-004-705-2	1.25	Decreasing	Male contraceptive screen [Motility]	91.5229309747952
W0002539	H10	10	H	VCL_median	63.72827166694543	2.5231243431893446	68.85113415306253	2.420193415507091	10.017397261116095	RFM-004-705-2	0.373	Decreasing	Male contraceptive screen [Motility]	92.55950893310124
W0002539	H11	11	H	VCL_median	68.84753312115136	2.5231243431893446	68.85113415306253	2.420193415507091	10.017397261116095	RFM-004-705-2	0.0932	Decreasing	Male contraceptive screen [Motility]	99.99476982920402
W0002539	H12	12	H	VCL_median	69.20160121194876	2.5231243431893446	68.85113415306253	2.420193415507091	10.017397261116095	RFM-004-705-2	0.0466	Decreasing	Male contraceptive screen [Motility]	100.50902147538645
W0002539	H13	13	H	VCL_median	68.10831958117178	2.5231243431893446	68.85113415306253	2.420193415507091	10.017397261116095	RFM-004-705-2	0.0139	Decreasing	Male contraceptive screen [Motility]	98.92112950494119
W0002539	H14	14	H	VCL_median	71.4474697073126	2.5231243431893446	68.85113415306253	2.420193415507091	10.017397261116095	RFM-004-705-2	0.00346	Decreasing	Male contraceptive screen [Motility]	103.7709408656627
W0002539	J19	19	J	VCL_median	56.801558867795954	2.5231243431893446	68.85113415306253	2.420193415507091	10.017397261116095	RFM-003-386-3	9.99	Decreasing	Male contraceptive screen [Motility]	82.4990896177843
W0002539	J20	20	J	VCL_median	61.942225498196954	2.5231243431893446	68.85113415306253	2.420193415507091	10.017397261116095	RFM-003-386-3	2.5	Decreasing	Male contraceptive screen [Motility]	89.96543958229297
W0002539	J21	21	J	VCL_median	64.67138862092372	2.5231243431893446	68.85113415306253	2.420193415507091	10.017397261116095	RFM-003-386-3	1.25	Decreasing	Male contraceptive screen [Motility]	93.92930039053991
W0002539	J22	22	J	VCL_median	61.838243824849584	2.5231243431893446	68.85113415306253	2.420193415507091	10.017397261116095	RFM-003-386-3	0.373	Decreasing	Male contraceptive screen [Motility]	89.81441567451506
W0002539	K01	01	K	VCL_median	63.67643632308761	2.5231243431893446	68.85113415306253	2.420193415507091	10.017397261116095	RFM-003-386-3	0.0932	Decreasing	Male contraceptive screen [Motility]	92.48422281836189
W0002539	K02	02	K	VCL_median	66.30820461863547	2.5231243431893446	68.85113415306253	2.420193415507091	10.017397261116095	RFM-003-386-3	0.0466	Decreasing	Male contraceptive screen [Motility]	96.3066265128271
W0002539	K03	03	K	VCL_median	64.05712406074142	2.5231243431893446	68.85113415306253	2.420193415507091	10.017397261116095	RFM-003-386-3	0.0139	Decreasing	Male contraceptive screen [Motility]	93.03713707654607
W0002539	K04	04	K	VCL_median	69.62409563968134	2.5231243431893446	68.85113415306253	2.420193415507091	10.017397261116095	RFM-003-386-3	0.00346	Decreasing	Male contraceptive screen [Motility]	101.12265614230907
W0002539	L07	07	L	VCL_median	58.50462435743914	2.5231243431893446	68.85113415306253	2.420193415507091	10.017397261116095	RFM-003-055-7	9.99	Decreasing	Male contraceptive screen [Motility]	84.9726370917549
W0002539	L08	08	L	VCL_median	57.16665007930862	2.5231243431893446	68.85113415306253	2.420193415507091	10.017397261116095	RFM-003-055-7	2.5	Decreasing	Male contraceptive screen [Motility]	83.02935134259631
W0002539	L09	09	L	VCL_median	61.87674335609769	2.5231243431893446	68.85113415306253	2.420193415507091	10.017397261116095	RFM-003-055-7	1.25	Decreasing	Male contraceptive screen [Motility]	89.87033273633502
W0002539	L10	10	L	VCL_median	63.0725339494513	2.5231243431893446	68.85113415306253	2.420193415507091	10.017397261116095	RFM-003-055-7	0.373	Decreasing	Male contraceptive screen [Motility]	91.60710963632805
W0002539	L11	11	L	VCL_median	65.19598769537569	2.5231243431893446	68.85113415306253	2.420193415507091	10.017397261116095	RFM-003-055-7	0.0932	Decreasing	Male contraceptive screen [Motility]	94.69123275506092
W0002539	L12	12	L	VCL_median	65.92613739113624	2.5231243431893446	68.85113415306253	2.420193415507091	10.017397261116095	RFM-003-055-7	0.0466	Decreasing	Male contraceptive screen [Motility]	95.75170867131433
W0002539	L13	13	L	VCL_median	70.04917284563282	2.5231243431893446	68.85113415306253	2.420193415507091	10.017397261116095	RFM-003-055-7	0.0139	Decreasing	Male contraceptive screen [Motility]	101.74004205930281
W0002539	L14	14	L	VCL_median	69.97435586301984	2.5231243431893446	68.85113415306253	2.420193415507091	10.017397261116095	RFM-003-055-7	0.00346	Decreasing	Male contraceptive screen [Motility]	101.63137720790523
W0002539	M09	09	M	VCL_median	57.669102622985655	2.5231243431893446	68.85113415306253	2.420193415507091	10.017397261116095	RFM-002-146-5	9.99	Decreasing	Male contraceptive screen [Motility]	83.75911788872182
W0002539	M10	10	M	VCL_median	56.46756677096587	2.5231243431893446	68.85113415306253	2.420193415507091	10.017397261116095	RFM-002-146-5	2.5	Decreasing	Male contraceptive screen [Motility]	82.0139965239108
W0002539	M11	11	M	VCL_median	58.99488657420352	2.5231243431893446	68.85113415306253	2.420193415507091	10.017397261116095	RFM-002-146-5	1.25	Decreasing	Male contraceptive screen [Motility]	85.6846982985819
W0002539	M12	12	M	VCL_median	58.425447435968415	2.5231243431893446	68.85113415306253	2.420193415507091	10.017397261116095	RFM-002-146-5	0.373	Decreasing	Male contraceptive screen [Motility]	84.85763982635807
W0002539	M13	13	M	VCL_median	57.15015408040214	2.5231243431893446	68.85113415306253	2.420193415507091	10.017397261116095	RFM-002-146-5	0.0932	Decreasing	Male contraceptive screen [Motility]	83.0053924069747
W0002539	M14	14	M	VCL_median	59.62689389882702	2.5231243431893446	68.85113415306253	2.420193415507091	10.017397261116095	RFM-002-146-5	0.0466	Decreasing	Male contraceptive screen [Motility]	86.60263136155585
W0002539	M15	15	M	VCL_median	63.74800718148939	2.5231243431893446	68.85113415306253	2.420193415507091	10.017397261116095	RFM-002-146-5	0.0139	Decreasing	Male contraceptive screen [Motility]	92.58817297006551
W0002539	M16	16	M	VCL_median	65.19029969968526	2.5231243431893446	68.85113415306253	2.420193415507091	10.017397261116095	RFM-002-146-5	0.00346	Decreasing	Male contraceptive screen [Motility]	94.68297145949855
W0002539	P07	07	P	VCL_median	4.738748118312418	2.5231243431893446	68.85113415306253	2.420193415507091	10.017397261116095	RFM-003-300-1	9.99	Decreasing	Male contraceptive screen [Motility]	6.882599940587378
W0002539	P08	08	P	VCL_median	28.770477304064134	2.5231243431893446	68.85113415306253	2.420193415507091	10.017397261116095	RFM-003-300-1	2.5	Decreasing	Male contraceptive screen [Motility]	41.78649728573049
W0002539	P09	09	P	VCL_median	31.706305747716748	2.5231243431893446	68.85113415306253	2.420193415507091	10.017397261116095	RFM-003-300-1	1.25	Decreasing	Male contraceptive screen [Motility]	46.050520645354446
W0002539	P10	10	P	VCL_median	56.68840866187686	2.5231243431893446	68.85113415306253	2.420193415507091	10.017397261116095	RFM-003-300-1	0.373	Decreasing	Male contraceptive screen [Motility]	82.33474925170181
W0002539	P11	11	P	VCL_median	60.64499861764014	2.5231243431893446	68.85113415306253	2.420193415507091	10.017397261116095	RFM-003-300-1	0.0932	Decreasing	Male contraceptive screen [Motility]	88.08133571601104
W0002539	P12	12	P	VCL_median	63.081313031272764	2.5231243431893446	68.85113415306253	2.420193415507091	10.017397261116095	RFM-003-300-1	0.0466	Decreasing	Male contraceptive screen [Motility]	91.61986045289694
W0002539	P13	13	P	VCL_median	63.71397638203307	2.5231243431893446	68.85113415306253	2.420193415507091	10.017397261116095	RFM-003-300-1	0.0139	Decreasing	Male contraceptive screen [Motility]	92.53874633407044
W0002539	P14	14	P	VCL_median	64.08832247576134	2.5231243431893446	68.85113415306253	2.420193415507091	10.017397261116095	RFM-003-300-1	0.00346	Decreasing	Male contraceptive screen [Motility]	93.0824499321783
