# Supplementary material for: A phenotypic screening platform utilising human spermatozoa identifies compounds with contraceptive activity
Source: eLife. 2020 Jan 28;9:e51739. doi: 10.7554/eLife.51739 (PMC7046468; doi:10.7554/eLife.51739)
Supplement: Figure 3—source data 1. [file elife-51739-fig3-data1.csv]

Population	Count	ParentCount	ratio	well_number	x	y	plate	fl1_gate	fl3_gate	gate_frame	cpd_type
Pi+_PNA-	120	858	13.986013986013987	A01	01	A	W0002091	2.873342832077857	3.0030928990422483	360	Compound
Pi+_PNA+	79	858	9.207459207459207	A01	01	A	W0002091	2.873342832077857	3.0030928990422483	360	Compound
Pi-_PNA+	5	858	0.5827505827505828	A01	01	A	W0002091	2.873342832077857	3.0030928990422483	360	Compound
Pi-_PNA-	654	858	76.22377622377621	A01	01	A	W0002091	2.873342832077857	3.0030928990422483	360	Compound
Pi+_PNA-	138	666	20.72072072072072	A02	02	A	W0002091	2.873342832077857	3.0030928990422483	360	Compound
Pi+_PNA+	26	666	3.903903903903904	A02	02	A	W0002091	2.873342832077857	3.0030928990422483	360	Compound
Pi-_PNA+	2	666	0.3003003003003003	A02	02	A	W0002091	2.873342832077857	3.0030928990422483	360	Compound
Pi-_PNA-	500	666	75.07507507507508	A02	02	A	W0002091	2.873342832077857	3.0030928990422483	360	Compound
Pi+_PNA-	145	775	18.70967741935484	A03	03	A	W0002091	2.873342832077857	3.0030928990422483	360	Compound
Pi+_PNA+	86	775	11.096774193548386	A03	03	A	W0002091	2.873342832077857	3.0030928990422483	360	Compound
Pi-_PNA+	3	775	0.3870967741935484	A03	03	A	W0002091	2.873342832077857	3.0030928990422483	360	Compound
Pi-_PNA-	541	775	69.80645161290323	A03	03	A	W0002091	2.873342832077857	3.0030928990422483	360	Compound
Pi+_PNA-	126	705	17.872340425531917	A04	04	A	W0002091	2.873342832077857	3.0030928990422483	360	Compound
Pi+_PNA+	78	705	11.063829787234042	A04	04	A	W0002091	2.873342832077857	3.0030928990422483	360	Compound
Pi-_PNA+	9	705	1.276595744680851	A04	04	A	W0002091	2.873342832077857	3.0030928990422483	360	Compound
Pi-_PNA-	492	705	69.7872340425532	A04	04	A	W0002091	2.873342832077857	3.0030928990422483	360	Compound
Pi+_PNA-	132	659	20.030349013657055	A05	05	A	W0002091	2.873342832077857	3.0030928990422483	360	Compound
Pi+_PNA+	21	659	3.1866464339908953	A05	05	A	W0002091	2.873342832077857	3.0030928990422483	360	Compound
Pi-_PNA+	6	659	0.9104704097116844	A05	05	A	W0002091	2.873342832077857	3.0030928990422483	360	Compound
Pi-_PNA-	500	659	75.87253414264038	A05	05	A	W0002091	2.873342832077857	3.0030928990422483	360	Compound
Pi+_PNA-	107	657	16.28614916286149	A06	06	A	W0002091	2.873342832077857	3.0030928990422483	360	Compound
Pi+_PNA+	91	657	13.850837138508371	A06	06	A	W0002091	2.873342832077857	3.0030928990422483	360	Compound
Pi-_PNA+	8	657	1.21765601217656	A06	06	A	W0002091	2.873342832077857	3.0030928990422483	360	Compound
Pi-_PNA-	451	657	68.64535768645358	A06	06	A	W0002091	2.873342832077857	3.0030928990422483	360	Compound
Pi+_PNA-	116	586	19.795221843003414	A07	07	A	W0002091	2.873342832077857	3.0030928990422483	360	Compound
Pi+_PNA+	74	586	12.627986348122866	A07	07	A	W0002091	2.873342832077857	3.0030928990422483	360	Compound
Pi-_PNA+	5	586	0.8532423208191127	A07	07	A	W0002091	2.873342832077857	3.0030928990422483	360	Compound
Pi-_PNA-	391	586	66.72354948805462	A07	07	A	W0002091	2.873342832077857	3.0030928990422483	360	Compound
Pi+_PNA-	156	722	21.60664819944598	A08	08	A	W0002091	2.873342832077857	3.0030928990422483	360	Compound
Pi+_PNA+	82	722	11.357340720221606	A08	08	A	W0002091	2.873342832077857	3.0030928990422483	360	Compound
Pi-_PNA+	8	722	1.10803324099723	A08	08	A	W0002091	2.873342832077857	3.0030928990422483	360	Compound
Pi-_PNA-	476	722	65.92797783933518	A08	08	A	W0002091	2.873342832077857	3.0030928990422483	360	Compound
Pi+_PNA-	109	640	17.03125	A09	09	A	W0002091	2.873342832077857	3.0030928990422483	360	Compound
Pi+_PNA+	70	640	10.9375	A09	09	A	W0002091	2.873342832077857	3.0030928990422483	360	Compound
Pi-_PNA+	2	640	0.3125	A09	09	A	W0002091	2.873342832077857	3.0030928990422483	360	Compound
Pi-_PNA-	459	640	71.71875	A09	09	A	W0002091	2.873342832077857	3.0030928990422483	360	Compound
Pi+_PNA-	98	549	17.850637522768668	A10	10	A	W0002091	2.873342832077857	3.0030928990422483	360	Compound
Pi+_PNA+	62	549	11.293260473588344	A10	10	A	W0002091	2.873342832077857	3.0030928990422483	360	Compound
Pi-_PNA+	4	549	0.7285974499089253	A10	10	A	W0002091	2.873342832077857	3.0030928990422483	360	Compound
Pi-_PNA-	385	549	70.12750455373407	A10	10	A	W0002091	2.873342832077857	3.0030928990422483	360	Compound
Pi+_PNA-	130	590	22.033898305084744	A11	11	A	W0002091	2.873342832077857	3.0030928990422483	360	Compound
Pi+_PNA+	2	590	0.3389830508474576	A11	11	A	W0002091	2.873342832077857	3.0030928990422483	360	Compound
Pi-_PNA+	1	590	0.1694915254237288	A11	11	A	W0002091	2.873342832077857	3.0030928990422483	360	Compound
Pi-_PNA-	457	590	77.45762711864407	A11	11	A	W0002091	2.873342832077857	3.0030928990422483	360	Compound
Pi+_PNA-	167	599	27.879799666110184	A12	12	A	W0002091	2.873342832077857	3.0030928990422483	360	Compound
Pi+_PNA+	1	599	0.1669449081803005	A12	12	A	W0002091	2.873342832077857	3.0030928990422483	360	Compound
Pi-_PNA+	0	599	0	A12	12	A	W0002091	2.873342832077857	3.0030928990422483	360	Compound
Pi-_PNA-	431	599	71.95325542570951	A12	12	A	W0002091	2.873342832077857	3.0030928990422483	360	Compound
Pi+_PNA-	138	653	21.133231240428792	A13	13	A	W0002091	2.873342832077857	3.0030928990422483	360	Compound
Pi+_PNA+	52	653	7.9632465543644715	A13	13	A	W0002091	2.873342832077857	3.0030928990422483	360	Compound
Pi-_PNA+	3	653	0.45941807044410415	A13	13	A	W0002091	2.873342832077857	3.0030928990422483	360	Compound
Pi-_PNA-	460	653	70.44410413476263	A13	13	A	W0002091	2.873342832077857	3.0030928990422483	360	Compound
Pi+_PNA-	141	954	14.779874213836477	A14	14	A	W0002091	2.873342832077857	3.0030928990422483	360	Compound
Pi+_PNA+	52	954	5.450733752620545	A14	14	A	W0002091	2.873342832077857	3.0030928990422483	360	Compound
Pi-_PNA+	9	954	0.9433962264150944	A14	14	A	W0002091	2.873342832077857	3.0030928990422483	360	Compound
Pi-_PNA-	752	954	78.82599580712788	A14	14	A	W0002091	2.873342832077857	3.0030928990422483	360	Compound
Pi+_PNA-	158	592	26.68918918918919	A15	15	A	W0002091	2.873342832077857	3.0030928990422483	360	Compound
Pi+_PNA+	2	592	0.33783783783783783	A15	15	A	W0002091	2.873342832077857	3.0030928990422483	360	Compound
Pi-_PNA+	0	592	0	A15	15	A	W0002091	2.873342832077857	3.0030928990422483	360	Compound
Pi-_PNA-	432	592	72.97297297297297	A15	15	A	W0002091	2.873342832077857	3.0030928990422483	360	Compound
Pi+_PNA-	91	536	16.977611940298505	A16	16	A	W0002091	2.873342832077857	3.0030928990422483	360	Compound
Pi+_PNA+	35	536	6.529850746268656	A16	16	A	W0002091	2.873342832077857	3.0030928990422483	360	Compound
Pi-_PNA+	2	536	0.3731343283582089	A16	16	A	W0002091	2.873342832077857	3.0030928990422483	360	Compound
Pi-_PNA-	408	536	76.11940298507463	A16	16	A	W0002091	2.873342832077857	3.0030928990422483	360	Compound
Pi+_PNA-	133	589	22.58064516129032	A17	17	A	W0002091	2.873342832077857	3.0030928990422483	360	Compound
Pi+_PNA+	60	589	10.186757215619695	A17	17	A	W0002091	2.873342832077857	3.0030928990422483	360	Compound
Pi-_PNA+	1	589	0.1697792869269949	A17	17	A	W0002091	2.873342832077857	3.0030928990422483	360	Compound
Pi-_PNA-	395	589	67.06281833616299	A17	17	A	W0002091	2.873342832077857	3.0030928990422483	360	Compound
Pi+_PNA-	132	612	21.568627450980394	A18	18	A	W0002091	2.873342832077857	3.0030928990422483	360	Compound
Pi+_PNA+	52	612	8.49673202614379	A18	18	A	W0002091	2.873342832077857	3.0030928990422483	360	Compound
Pi-_PNA+	12	612	1.9607843137254901	A18	18	A	W0002091	2.873342832077857	3.0030928990422483	360	Compound
Pi-_PNA-	416	612	67.97385620915033	A18	18	A	W0002091	2.873342832077857	3.0030928990422483	360	Compound
Pi+_PNA-	98	532	18.421052631578945	A19	19	A	W0002091	2.873342832077857	3.0030928990422483	360	Compound
Pi+_PNA+	77	532	14.473684210526317	A19	19	A	W0002091	2.873342832077857	3.0030928990422483	360	Compound
Pi-_PNA+	2	532	0.37593984962406013	A19	19	A	W0002091	2.873342832077857	3.0030928990422483	360	Compound
Pi-_PNA-	355	532	66.72932330827066	A19	19	A	W0002091	2.873342832077857	3.0030928990422483	360	Compound
Pi+_PNA-	96	532	18.045112781954884	A20	20	A	W0002091	2.873342832077857	3.0030928990422483	360	Compound
Pi+_PNA+	68	532	12.781954887218044	A20	20	A	W0002091	2.873342832077857	3.0030928990422483	360	Compound
Pi-_PNA+	11	532	2.0676691729323307	A20	20	A	W0002091	2.873342832077857	3.0030928990422483	360	Compound
Pi-_PNA-	357	532	67.10526315789474	A20	20	A	W0002091	2.873342832077857	3.0030928990422483	360	Compound
Pi+_PNA-	111	626	17.731629392971247	A21	21	A	W0002091	2.873342832077857	3.0030928990422483	360	Compound
Pi+_PNA+	66	626	10.543130990415335	A21	21	A	W0002091	2.873342832077857	3.0030928990422483	360	Compound
Pi-_PNA+	3	626	0.4792332268370607	A21	21	A	W0002091	2.873342832077857	3.0030928990422483	360	Compound
Pi-_PNA-	446	626	71.24600638977637	A21	21	A	W0002091	2.873342832077857	3.0030928990422483	360	Compound
Pi+_PNA-	109	586	18.600682593856654	A22	22	A	W0002091	2.873342832077857	3.0030928990422483	360	Compound
Pi+_PNA+	62	586	10.580204778156997	A22	22	A	W0002091	2.873342832077857	3.0030928990422483	360	Compound
Pi-_PNA+	3	586	0.5119453924914675	A22	22	A	W0002091	2.873342832077857	3.0030928990422483	360	Compound
Pi-_PNA-	412	586	70.30716723549489	A22	22	A	W0002091	2.873342832077857	3.0030928990422483	360	Compound
Pi+_PNA-	131	726	18.044077134986225	A23	23	A	W0002091	2.873342832077857	3.0030928990422483	360	Negative Control
Pi+_PNA+	71	726	9.77961432506887	A23	23	A	W0002091	2.873342832077857	3.0030928990422483	360	Negative Control
Pi-_PNA+	16	726	2.203856749311295	A23	23	A	W0002091	2.873342832077857	3.0030928990422483	360	Negative Control
Pi-_PNA-	508	726	69.9724517906336	A23	23	A	W0002091	2.873342832077857	3.0030928990422483	360	Negative Control
Pi+_PNA-	148	791	18.710493046776232	A24	24	A	W0002091	2.873342832077857	3.0030928990422483	360	Positive Control
Pi+_PNA+	46	791	5.815423514538559	A24	24	A	W0002091	2.873342832077857	3.0030928990422483	360	Positive Control
Pi-_PNA+	19	791	2.402022756005057	A24	24	A	W0002091	2.873342832077857	3.0030928990422483	360	Positive Control
Pi-_PNA-	578	791	73.07206068268015	A24	24	A	W0002091	2.873342832077857	3.0030928990422483	360	Positive Control
Pi+_PNA-	146	494	29.554655870445345	B01	01	B	W0002091	2.873342832077857	3.0030928990422483	360	Compound
Pi+_PNA+	6	494	1.214574898785425	B01	01	B	W0002091	2.873342832077857	3.0030928990422483	360	Compound
Pi-_PNA+	2	494	0.4048582995951417	B01	01	B	W0002091	2.873342832077857	3.0030928990422483	360	Compound
Pi-_PNA-	340	494	68.82591093117408	B01	01	B	W0002091	2.873342832077857	3.0030928990422483	360	Compound
Pi+_PNA-	159	453	35.099337748344375	B02	02	B	W0002091	2.873342832077857	3.0030928990422483	360	Compound
Pi+_PNA+	7	453	1.545253863134658	B02	02	B	W0002091	2.873342832077857	3.0030928990422483	360	Compound
Pi-_PNA+	0	453	0	B02	02	B	W0002091	2.873342832077857	3.0030928990422483	360	Compound
Pi-_PNA-	287	453	63.35540838852097	B02	02	B	W0002091	2.873342832077857	3.0030928990422483	360	Compound
Pi+_PNA-	89	358	24.860335195530723	B03	03	B	W0002091	2.873342832077857	3.0030928990422483	360	Compound
Pi+_PNA+	43	358	12.011173184357542	B03	03	B	W0002091	2.873342832077857	3.0030928990422483	360	Compound
Pi-_PNA+	4	358	1.1173184357541899	B03	03	B	W0002091	2.873342832077857	3.0030928990422483	360	Compound
Pi-_PNA-	222	358	62.01117318435754	B03	03	B	W0002091	2.873342832077857	3.0030928990422483	360	Compound
Pi+_PNA-	105	447	23.48993288590604	B04	04	B	W0002091	2.873342832077857	3.0030928990422483	360	Compound
Pi+_PNA+	45	447	10.06711409395973	B04	04	B	W0002091	2.873342832077857	3.0030928990422483	360	Compound
Pi-_PNA+	0	447	0	B04	04	B	W0002091	2.873342832077857	3.0030928990422483	360	Compound
Pi-_PNA-	297	447	66.44295302013423	B04	04	B	W0002091	2.873342832077857	3.0030928990422483	360	Compound
Pi+_PNA-	140	472	29.66101694915254	B05	05	B	W0002091	2.873342832077857	3.0030928990422483	360	Compound
Pi+_PNA+	34	472	7.203389830508475	B05	05	B	W0002091	2.873342832077857	3.0030928990422483	360	Compound
Pi-_PNA+	0	472	0	B05	05	B	W0002091	2.873342832077857	3.0030928990422483	360	Compound
Pi-_PNA-	298	472	63.13559322033898	B05	05	B	W0002091	2.873342832077857	3.0030928990422483	360	Compound
Pi+_PNA-	117	479	24.4258872651357	B06	06	B	W0002091	2.873342832077857	3.0030928990422483	360	Compound
Pi+_PNA+	59	479	12.31732776617954	B06	06	B	W0002091	2.873342832077857	3.0030928990422483	360	Compound
Pi-_PNA+	3	479	0.6263048016701461	B06	06	B	W0002091	2.873342832077857	3.0030928990422483	360	Compound
Pi-_PNA-	300	479	62.63048016701461	B06	06	B	W0002091	2.873342832077857	3.0030928990422483	360	Compound
Pi+_PNA-	103	460	22.39130434782609	B07	07	B	W0002091	2.873342832077857	3.0030928990422483	360	Compound
Pi+_PNA+	68	460	14.782608695652174	B07	07	B	W0002091	2.873342832077857	3.0030928990422483	360	Compound
Pi-_PNA+	1	460	0.21739130434782608	B07	07	B	W0002091	2.873342832077857	3.0030928990422483	360	Compound
Pi-_PNA-	288	460	62.60869565217392	B07	07	B	W0002091	2.873342832077857	3.0030928990422483	360	Compound
Pi+_PNA-	102	474	21.518987341772153	B08	08	B	W0002091	2.873342832077857	3.0030928990422483	360	Compound
Pi+_PNA+	59	474	12.447257383966246	B08	08	B	W0002091	2.873342832077857	3.0030928990422483	360	Compound
Pi-_PNA+	2	474	0.42194092827004215	B08	08	B	W0002091	2.873342832077857	3.0030928990422483	360	Compound
Pi-_PNA-	311	474	65.61181434599156	B08	08	B	W0002091	2.873342832077857	3.0030928990422483	360	Compound
Pi+_PNA-	93	401	23.19201995012469	B09	09	B	W0002091	2.873342832077857	3.0030928990422483	360	Compound
Pi+_PNA+	53	401	13.216957605985039	B09	09	B	W0002091	2.873342832077857	3.0030928990422483	360	Compound
Pi-_PNA+	5	401	1.2468827930174564	B09	09	B	W0002091	2.873342832077857	3.0030928990422483	360	Compound
Pi-_PNA-	250	401	62.34413965087282	B09	09	B	W0002091	2.873342832077857	3.0030928990422483	360	Compound
Pi+_PNA-	113	532	21.2406015037594	B10	10	B	W0002091	2.873342832077857	3.0030928990422483	360	Compound
Pi+_PNA+	70	532	13.157894736842104	B10	10	B	W0002091	2.873342832077857	3.0030928990422483	360	Compound
Pi-_PNA+	5	532	0.9398496240601504	B10	10	B	W0002091	2.873342832077857	3.0030928990422483	360	Compound
Pi-_PNA-	344	532	64.66165413533834	B10	10	B	W0002091	2.873342832077857	3.0030928990422483	360	Compound
Pi+_PNA-	109	481	22.66112266112266	B11	11	B	W0002091	2.873342832077857	3.0030928990422483	360	Compound
Pi+_PNA+	55	481	11.434511434511435	B11	11	B	W0002091	2.873342832077857	3.0030928990422483	360	Compound
Pi-_PNA+	5	481	1.0395010395010396	B11	11	B	W0002091	2.873342832077857	3.0030928990422483	360	Compound
Pi-_PNA-	312	481	64.86486486486487	B11	11	B	W0002091	2.873342832077857	3.0030928990422483	360	Compound
Pi+_PNA-	116	573	20.24432809773124	B12	12	B	W0002091	2.873342832077857	3.0030928990422483	360	Compound
Pi+_PNA+	61	573	10.645724258289704	B12	12	B	W0002091	2.873342832077857	3.0030928990422483	360	Compound
Pi-_PNA+	1	573	0.17452006980802792	B12	12	B	W0002091	2.873342832077857	3.0030928990422483	360	Compound
Pi-_PNA-	395	573	68.93542757417103	B12	12	B	W0002091	2.873342832077857	3.0030928990422483	360	Compound
Pi+_PNA-	101	477	21.17400419287212	B13	13	B	W0002091	2.873342832077857	3.0030928990422483	360	Compound
Pi+_PNA+	34	477	7.127882599580712	B13	13	B	W0002091	2.873342832077857	3.0030928990422483	360	Compound
Pi-_PNA+	2	477	0.41928721174004197	B13	13	B	W0002091	2.873342832077857	3.0030928990422483	360	Compound
Pi-_PNA-	340	477	71.27882599580713	B13	13	B	W0002091	2.873342832077857	3.0030928990422483	360	Compound
Pi+_PNA-	98	444	22.07207207207207	B14	14	B	W0002091	2.873342832077857	3.0030928990422483	360	Compound
Pi+_PNA+	35	444	7.882882882882883	B14	14	B	W0002091	2.873342832077857	3.0030928990422483	360	Compound
Pi-_PNA+	1	444	0.22522522522522523	B14	14	B	W0002091	2.873342832077857	3.0030928990422483	360	Compound
Pi-_PNA-	310	444	69.81981981981981	B14	14	B	W0002091	2.873342832077857	3.0030928990422483	360	Compound
Pi+_PNA-	92	431	21.34570765661253	B15	15	B	W0002091	2.873342832077857	3.0030928990422483	360	Compound
Pi+_PNA+	47	431	10.904872389791183	B15	15	B	W0002091	2.873342832077857	3.0030928990422483	360	Compound
Pi-_PNA+	0	431	0	B15	15	B	W0002091	2.873342832077857	3.0030928990422483	360	Compound
Pi-_PNA-	292	431	67.74941995359629	B15	15	B	W0002091	2.873342832077857	3.0030928990422483	360	Compound
Pi+_PNA-	73	474	15.400843881856542	B16	16	B	W0002091	2.873342832077857	3.0030928990422483	360	Compound
Pi+_PNA+	58	474	12.236286919831224	B16	16	B	W0002091	2.873342832077857	3.0030928990422483	360	Compound
Pi-_PNA+	7	474	1.4767932489451476	B16	16	B	W0002091	2.873342832077857	3.0030928990422483	360	Compound
Pi-_PNA-	336	474	70.88607594936708	B16	16	B	W0002091	2.873342832077857	3.0030928990422483	360	Compound
Pi+_PNA-	106	518	20.463320463320464	B17	17	B	W0002091	2.873342832077857	3.0030928990422483	360	Compound
Pi+_PNA+	58	518	11.196911196911197	B17	17	B	W0002091	2.873342832077857	3.0030928990422483	360	Compound
Pi-_PNA+	2	518	0.3861003861003861	B17	17	B	W0002091	2.873342832077857	3.0030928990422483	360	Compound
Pi-_PNA-	352	518	67.95366795366795	B17	17	B	W0002091	2.873342832077857	3.0030928990422483	360	Compound
Pi+_PNA-	135	506	26.679841897233203	B18	18	B	W0002091	2.873342832077857	3.0030928990422483	360	Compound
Pi+_PNA+	54	506	10.67193675889328	B18	18	B	W0002091	2.873342832077857	3.0030928990422483	360	Compound
Pi-_PNA+	3	506	0.592885375494071	B18	18	B	W0002091	2.873342832077857	3.0030928990422483	360	Compound
Pi-_PNA-	314	506	62.055335968379445	B18	18	B	W0002091	2.873342832077857	3.0030928990422483	360	Compound
Pi+_PNA-	132	526	25.09505703422053	B19	19	B	W0002091	2.873342832077857	3.0030928990422483	360	Compound
Pi+_PNA+	51	526	9.695817490494296	B19	19	B	W0002091	2.873342832077857	3.0030928990422483	360	Compound
Pi-_PNA+	4	526	0.7604562737642585	B19	19	B	W0002091	2.873342832077857	3.0030928990422483	360	Compound
Pi-_PNA-	339	526	64.44866920152091	B19	19	B	W0002091	2.873342832077857	3.0030928990422483	360	Compound
Pi+_PNA-	97	476	20.3781512605042	B20	20	B	W0002091	2.873342832077857	3.0030928990422483	360	Compound
Pi+_PNA+	56	476	11.76470588235294	B20	20	B	W0002091	2.873342832077857	3.0030928990422483	360	Compound
Pi-_PNA+	5	476	1.050420168067227	B20	20	B	W0002091	2.873342832077857	3.0030928990422483	360	Compound
Pi-_PNA-	318	476	66.80672268907563	B20	20	B	W0002091	2.873342832077857	3.0030928990422483	360	Compound
Pi+_PNA-	78	476	16.386554621848738	B21	21	B	W0002091	2.873342832077857	3.0030928990422483	360	Compound
Pi+_PNA+	61	476	12.815126050420167	B21	21	B	W0002091	2.873342832077857	3.0030928990422483	360	Compound
Pi-_PNA+	3	476	0.6302521008403361	B21	21	B	W0002091	2.873342832077857	3.0030928990422483	360	Compound
Pi-_PNA-	334	476	70.16806722689076	B21	21	B	W0002091	2.873342832077857	3.0030928990422483	360	Compound
Pi+_PNA-	88	457	19.25601750547046	B22	22	B	W0002091	2.873342832077857	3.0030928990422483	360	Compound
Pi+_PNA+	49	457	10.722100656455142	B22	22	B	W0002091	2.873342832077857	3.0030928990422483	360	Compound
Pi-_PNA+	3	457	0.6564551422319475	B22	22	B	W0002091	2.873342832077857	3.0030928990422483	360	Compound
Pi-_PNA-	317	457	69.36542669584244	B22	22	B	W0002091	2.873342832077857	3.0030928990422483	360	Compound
Pi+_PNA-	116	658	17.62917933130699	B23	23	B	W0002091	2.873342832077857	3.0030928990422483	360	Negative Control
Pi+_PNA+	49	658	7.446808510638298	B23	23	B	W0002091	2.873342832077857	3.0030928990422483	360	Negative Control
Pi-_PNA+	24	658	3.64741641337386	B23	23	B	W0002091	2.873342832077857	3.0030928990422483	360	Negative Control
Pi-_PNA-	469	658	71.27659574468085	B23	23	B	W0002091	2.873342832077857	3.0030928990422483	360	Negative Control
Pi+_PNA-	155	710	21.830985915492956	B24	24	B	W0002091	2.873342832077857	3.0030928990422483	360	Positive Control
Pi+_PNA+	43	710	6.056338028169014	B24	24	B	W0002091	2.873342832077857	3.0030928990422483	360	Positive Control
Pi-_PNA+	28	710	3.943661971830986	B24	24	B	W0002091	2.873342832077857	3.0030928990422483	360	Positive Control
Pi-_PNA-	484	710	68.16901408450704	B24	24	B	W0002091	2.873342832077857	3.0030928990422483	360	Positive Control
Pi+_PNA-	122	700	17.42857142857143	C01	01	C	W0002091	2.873342832077857	3.0030928990422483	360	Compound
Pi+_PNA+	120	700	17.142857142857142	C01	01	C	W0002091	2.873342832077857	3.0030928990422483	360	Compound
Pi-_PNA+	5	700	0.7142857142857143	C01	01	C	W0002091	2.873342832077857	3.0030928990422483	360	Compound
Pi-_PNA-	453	700	64.71428571428571	C01	01	C	W0002091	2.873342832077857	3.0030928990422483	360	Compound
Pi+_PNA-	116	616	18.83116883116883	C02	02	C	W0002091	2.873342832077857	3.0030928990422483	360	Compound
Pi+_PNA+	105	616	17.045454545454543	C02	02	C	W0002091	2.873342832077857	3.0030928990422483	360	Compound
Pi-_PNA+	5	616	0.8116883116883116	C02	02	C	W0002091	2.873342832077857	3.0030928990422483	360	Compound
Pi-_PNA-	390	616	63.31168831168831	C02	02	C	W0002091	2.873342832077857	3.0030928990422483	360	Compound
Pi+_PNA-	124	570	21.75438596491228	C03	03	C	W0002091	2.873342832077857	3.0030928990422483	360	Compound
Pi+_PNA+	126	570	22.105263157894736	C03	03	C	W0002091	2.873342832077857	3.0030928990422483	360	Compound
Pi-_PNA+	10	570	1.7543859649122806	C03	03	C	W0002091	2.873342832077857	3.0030928990422483	360	Compound
Pi-_PNA-	310	570	54.385964912280706	C03	03	C	W0002091	2.873342832077857	3.0030928990422483	360	Compound
Pi+_PNA-	68	379	17.941952506596305	C04	04	C	W0002091	2.873342832077857	3.0030928990422483	360	Compound
Pi+_PNA+	74	379	19.525065963060687	C04	04	C	W0002091	2.873342832077857	3.0030928990422483	360	Compound
Pi-_PNA+	0	379	0	C04	04	C	W0002091	2.873342832077857	3.0030928990422483	360	Compound
Pi-_PNA-	237	379	62.532981530343015	C04	04	C	W0002091	2.873342832077857	3.0030928990422483	360	Compound
Pi+_PNA-	137	581	23.580034423407916	C05	05	C	W0002091	2.873342832077857	3.0030928990422483	360	Compound
Pi+_PNA+	139	581	23.924268502581754	C05	05	C	W0002091	2.873342832077857	3.0030928990422483	360	Compound
Pi-_PNA+	5	581	0.8605851979345954	C05	05	C	W0002091	2.873342832077857	3.0030928990422483	360	Compound
Pi-_PNA-	300	581	51.63511187607573	C05	05	C	W0002091	2.873342832077857	3.0030928990422483	360	Compound
Pi+_PNA-	125	515	24.271844660194176	C06	06	C	W0002091	2.873342832077857	3.0030928990422483	360	Compound
Pi+_PNA+	117	515	22.718446601941746	C06	06	C	W0002091	2.873342832077857	3.0030928990422483	360	Compound
Pi-_PNA+	6	515	1.1650485436893203	C06	06	C	W0002091	2.873342832077857	3.0030928990422483	360	Compound
Pi-_PNA-	267	515	51.84466019417475	C06	06	C	W0002091	2.873342832077857	3.0030928990422483	360	Compound
Pi+_PNA-	106	522	20.306513409961685	C07	07	C	W0002091	2.873342832077857	3.0030928990422483	360	Compound
Pi+_PNA+	91	522	17.432950191570882	C07	07	C	W0002091	2.873342832077857	3.0030928990422483	360	Compound
Pi-_PNA+	4	522	0.7662835249042145	C07	07	C	W0002091	2.873342832077857	3.0030928990422483	360	Compound
Pi-_PNA-	321	522	61.49425287356321	C07	07	C	W0002091	2.873342832077857	3.0030928990422483	360	Compound
Pi+_PNA-	61	388	15.721649484536082	C08	08	C	W0002091	2.873342832077857	3.0030928990422483	360	Compound
Pi+_PNA+	91	388	23.45360824742268	C08	08	C	W0002091	2.873342832077857	3.0030928990422483	360	Compound
Pi-_PNA+	6	388	1.5463917525773196	C08	08	C	W0002091	2.873342832077857	3.0030928990422483	360	Compound
Pi-_PNA-	230	388	59.27835051546392	C08	08	C	W0002091	2.873342832077857	3.0030928990422483	360	Compound
Pi+_PNA-	95	414	22.946859903381643	C09	09	C	W0002091	2.873342832077857	3.0030928990422483	360	Compound
Pi+_PNA+	83	414	20.048309178743963	C09	09	C	W0002091	2.873342832077857	3.0030928990422483	360	Compound
Pi-_PNA+	5	414	1.2077294685990339	C09	09	C	W0002091	2.873342832077857	3.0030928990422483	360	Compound
Pi-_PNA-	231	414	55.79710144927537	C09	09	C	W0002091	2.873342832077857	3.0030928990422483	360	Compound
Pi+_PNA-	98	442	22.171945701357465	C10	10	C	W0002091	2.873342832077857	3.0030928990422483	360	Compound
Pi+_PNA+	83	442	18.778280542986426	C10	10	C	W0002091	2.873342832077857	3.0030928990422483	360	Compound
Pi-_PNA+	1	442	0.22624434389140274	C10	10	C	W0002091	2.873342832077857	3.0030928990422483	360	Compound
Pi-_PNA-	260	442	58.82352941176471	C10	10	C	W0002091	2.873342832077857	3.0030928990422483	360	Compound
Pi+_PNA-	65	376	17.287234042553195	C11	11	C	W0002091	2.873342832077857	3.0030928990422483	360	Compound
Pi+_PNA+	74	376	19.680851063829788	C11	11	C	W0002091	2.873342832077857	3.0030928990422483	360	Compound
Pi-_PNA+	13	376	3.4574468085106385	C11	11	C	W0002091	2.873342832077857	3.0030928990422483	360	Compound
Pi-_PNA-	224	376	59.57446808510638	C11	11	C	W0002091	2.873342832077857	3.0030928990422483	360	Compound
Pi+_PNA-	72	375	19.2	C12	12	C	W0002091	2.873342832077857	3.0030928990422483	360	Compound
Pi+_PNA+	74	375	19.733333333333334	C12	12	C	W0002091	2.873342832077857	3.0030928990422483	360	Compound
Pi-_PNA+	2	375	0.5333333333333333	C12	12	C	W0002091	2.873342832077857	3.0030928990422483	360	Compound
Pi-_PNA-	227	375	60.53333333333333	C12	12	C	W0002091	2.873342832077857	3.0030928990422483	360	Compound
Pi+_PNA-	111	451	24.6119733924612	C13	13	C	W0002091	2.873342832077857	3.0030928990422483	360	Compound
Pi+_PNA+	59	451	13.082039911308204	C13	13	C	W0002091	2.873342832077857	3.0030928990422483	360	Compound
Pi-_PNA+	2	451	0.4434589800443459	C13	13	C	W0002091	2.873342832077857	3.0030928990422483	360	Compound
Pi-_PNA-	279	451	61.86252771618626	C13	13	C	W0002091	2.873342832077857	3.0030928990422483	360	Compound
Pi+_PNA-	89	496	17.943548387096776	C14	14	C	W0002091	2.873342832077857	3.0030928990422483	360	Compound
Pi+_PNA+	100	496	20.161290322580644	C14	14	C	W0002091	2.873342832077857	3.0030928990422483	360	Compound
Pi-_PNA+	6	496	1.2096774193548387	C14	14	C	W0002091	2.873342832077857	3.0030928990422483	360	Compound
Pi-_PNA-	301	496	60.68548387096774	C14	14	C	W0002091	2.873342832077857	3.0030928990422483	360	Compound
Pi+_PNA-	78	404	19.306930693069308	C15	15	C	W0002091	2.873342832077857	3.0030928990422483	360	Compound
Pi+_PNA+	64	404	15.841584158415841	C15	15	C	W0002091	2.873342832077857	3.0030928990422483	360	Compound
Pi-_PNA+	4	404	0.9900990099009901	C15	15	C	W0002091	2.873342832077857	3.0030928990422483	360	Compound
Pi-_PNA-	258	404	63.86138613861386	C15	15	C	W0002091	2.873342832077857	3.0030928990422483	360	Compound
Pi+_PNA-	71	333	21.32132132132132	C16	16	C	W0002091	2.873342832077857	3.0030928990422483	360	Compound
Pi+_PNA+	70	333	21.02102102102102	C16	16	C	W0002091	2.873342832077857	3.0030928990422483	360	Compound
Pi-_PNA+	3	333	0.9009009009009009	C16	16	C	W0002091	2.873342832077857	3.0030928990422483	360	Compound
Pi-_PNA-	189	333	56.75675675675676	C16	16	C	W0002091	2.873342832077857	3.0030928990422483	360	Compound
Pi+_PNA-	78	433	18.013856812933028	C17	17	C	W0002091	2.873342832077857	3.0030928990422483	360	Compound
Pi+_PNA+	96	433	22.170900692840647	C17	17	C	W0002091	2.873342832077857	3.0030928990422483	360	Compound
Pi-_PNA+	5	433	1.1547344110854503	C17	17	C	W0002091	2.873342832077857	3.0030928990422483	360	Compound
Pi-_PNA-	254	433	58.66050808314087	C17	17	C	W0002091	2.873342832077857	3.0030928990422483	360	Compound
Pi+_PNA-	80	408	19.607843137254903	C18	18	C	W0002091	2.873342832077857	3.0030928990422483	360	Compound
Pi+_PNA+	63	408	15.441176470588236	C18	18	C	W0002091	2.873342832077857	3.0030928990422483	360	Compound
Pi-_PNA+	1	408	0.24509803921568626	C18	18	C	W0002091	2.873342832077857	3.0030928990422483	360	Compound
Pi-_PNA-	264	408	64.70588235294117	C18	18	C	W0002091	2.873342832077857	3.0030928990422483	360	Compound
Pi+_PNA-	84	437	19.221967963386728	C19	19	C	W0002091	2.873342832077857	3.0030928990422483	360	Compound
Pi+_PNA+	119	437	27.23112128146453	C19	19	C	W0002091	2.873342832077857	3.0030928990422483	360	Compound
Pi-_PNA+	2	437	0.4576659038901602	C19	19	C	W0002091	2.873342832077857	3.0030928990422483	360	Compound
Pi-_PNA-	232	437	53.08924485125858	C19	19	C	W0002091	2.873342832077857	3.0030928990422483	360	Compound
Pi+_PNA-	86	419	20.52505966587112	C20	20	C	W0002091	2.873342832077857	3.0030928990422483	360	Compound
Pi+_PNA+	71	419	16.94510739856802	C20	20	C	W0002091	2.873342832077857	3.0030928990422483	360	Compound
Pi-_PNA+	0	419	0	C20	20	C	W0002091	2.873342832077857	3.0030928990422483	360	Compound
Pi-_PNA-	262	419	62.52983293556086	C20	20	C	W0002091	2.873342832077857	3.0030928990422483	360	Compound
Pi+_PNA-	74	354	20.903954802259886	C21	21	C	W0002091	2.873342832077857	3.0030928990422483	360	Compound
Pi+_PNA+	90	354	25.423728813559322	C21	21	C	W0002091	2.873342832077857	3.0030928990422483	360	Compound
Pi-_PNA+	3	354	0.847457627118644	C21	21	C	W0002091	2.873342832077857	3.0030928990422483	360	Compound
Pi-_PNA-	187	354	52.824858757062145	C21	21	C	W0002091	2.873342832077857	3.0030928990422483	360	Compound
Pi+_PNA-	76	382	19.895287958115183	C22	22	C	W0002091	2.873342832077857	3.0030928990422483	360	Compound
Pi+_PNA+	55	382	14.397905759162304	C22	22	C	W0002091	2.873342832077857	3.0030928990422483	360	Compound
Pi-_PNA+	1	382	0.2617801047120419	C22	22	C	W0002091	2.873342832077857	3.0030928990422483	360	Compound
Pi-_PNA-	250	382	65.44502617801047	C22	22	C	W0002091	2.873342832077857	3.0030928990422483	360	Compound
Pi+_PNA-	113	456	24.780701754385966	C23	23	C	W0002091	2.873342832077857	3.0030928990422483	360	Negative Control
Pi+_PNA+	68	456	14.912280701754385	C23	23	C	W0002091	2.873342832077857	3.0030928990422483	360	Negative Control
Pi-_PNA+	7	456	1.5350877192982455	C23	23	C	W0002091	2.873342832077857	3.0030928990422483	360	Negative Control
Pi-_PNA-	268	456	58.77192982456141	C23	23	C	W0002091	2.873342832077857	3.0030928990422483	360	Negative Control
Pi+_PNA-	128	576	22.22222222222222	C24	24	C	W0002091	2.873342832077857	3.0030928990422483	360	Positive Control
Pi+_PNA+	62	576	10.76388888888889	C24	24	C	W0002091	2.873342832077857	3.0030928990422483	360	Positive Control
Pi-_PNA+	18	576	3.125	C24	24	C	W0002091	2.873342832077857	3.0030928990422483	360	Positive Control
Pi-_PNA-	368	576	63.888888888888886	C24	24	C	W0002091	2.873342832077857	3.0030928990422483	360	Positive Control
Pi+_PNA-	125	564	22.163120567375884	D01	01	D	W0002091	2.873342832077857	3.0030928990422483	360	Compound
Pi+_PNA+	112	564	19.858156028368796	D01	01	D	W0002091	2.873342832077857	3.0030928990422483	360	Compound
Pi-_PNA+	3	564	0.5319148936170213	D01	01	D	W0002091	2.873342832077857	3.0030928990422483	360	Compound
Pi-_PNA-	324	564	57.446808510638306	D01	01	D	W0002091	2.873342832077857	3.0030928990422483	360	Compound
Pi+_PNA-	120	477	25.157232704402517	D02	02	D	W0002091	2.873342832077857	3.0030928990422483	360	Compound
Pi+_PNA+	96	477	20.125786163522015	D02	02	D	W0002091	2.873342832077857	3.0030928990422483	360	Compound
Pi-_PNA+	5	477	1.0482180293501049	D02	02	D	W0002091	2.873342832077857	3.0030928990422483	360	Compound
Pi-_PNA-	256	477	53.66876310272537	D02	02	D	W0002091	2.873342832077857	3.0030928990422483	360	Compound
Pi+_PNA-	110	480	22.916666666666664	D03	03	D	W0002091	2.873342832077857	3.0030928990422483	360	Compound
Pi+_PNA+	87	480	18.125	D03	03	D	W0002091	2.873342832077857	3.0030928990422483	360	Compound
Pi-_PNA+	1	480	0.20833333333333334	D03	03	D	W0002091	2.873342832077857	3.0030928990422483	360	Compound
Pi-_PNA-	282	480	58.75	D03	03	D	W0002091	2.873342832077857	3.0030928990422483	360	Compound
Pi+_PNA-	73	348	20.977011494252874	D04	04	D	W0002091	2.873342832077857	3.0030928990422483	360	Compound
Pi+_PNA+	58	348	16.666666666666664	D04	04	D	W0002091	2.873342832077857	3.0030928990422483	360	Compound
Pi-_PNA+	5	348	1.4367816091954022	D04	04	D	W0002091	2.873342832077857	3.0030928990422483	360	Compound
Pi-_PNA-	212	348	60.91954022988506	D04	04	D	W0002091	2.873342832077857	3.0030928990422483	360	Compound
Pi+_PNA-	108	444	24.324324324324326	D05	05	D	W0002091	2.873342832077857	3.0030928990422483	360	Compound
Pi+_PNA+	107	444	24.0990990990991	D05	05	D	W0002091	2.873342832077857	3.0030928990422483	360	Compound
Pi-_PNA+	0	444	0	D05	05	D	W0002091	2.873342832077857	3.0030928990422483	360	Compound
Pi-_PNA-	229	444	51.57657657657657	D05	05	D	W0002091	2.873342832077857	3.0030928990422483	360	Compound
Pi+_PNA-	74	450	16.444444444444446	D06	06	D	W0002091	2.873342832077857	3.0030928990422483	360	Compound
Pi+_PNA+	71	450	15.777777777777777	D06	06	D	W0002091	2.873342832077857	3.0030928990422483	360	Compound
Pi-_PNA+	3	450	0.6666666666666667	D06	06	D	W0002091	2.873342832077857	3.0030928990422483	360	Compound
Pi-_PNA-	302	450	67.11111111111111	D06	06	D	W0002091	2.873342832077857	3.0030928990422483	360	Compound
Pi+_PNA-	74	352	21.022727272727273	D07	07	D	W0002091	2.873342832077857	3.0030928990422483	360	Compound
Pi+_PNA+	65	352	18.46590909090909	D07	07	D	W0002091	2.873342832077857	3.0030928990422483	360	Compound
Pi-_PNA+	5	352	1.4204545454545454	D07	07	D	W0002091	2.873342832077857	3.0030928990422483	360	Compound
Pi-_PNA-	208	352	59.09090909090909	D07	07	D	W0002091	2.873342832077857	3.0030928990422483	360	Compound
Pi+_PNA-	78	387	20.155038759689923	D08	08	D	W0002091	2.873342832077857	3.0030928990422483	360	Compound
Pi+_PNA+	81	387	20.930232558139537	D08	08	D	W0002091	2.873342832077857	3.0030928990422483	360	Compound
Pi-_PNA+	5	387	1.2919896640826873	D08	08	D	W0002091	2.873342832077857	3.0030928990422483	360	Compound
Pi-_PNA-	223	387	57.622739018087856	D08	08	D	W0002091	2.873342832077857	3.0030928990422483	360	Compound
Pi+_PNA-	91	403	22.58064516129032	D09	09	D	W0002091	2.873342832077857	3.0030928990422483	360	Compound
Pi+_PNA+	73	403	18.11414392059553	D09	09	D	W0002091	2.873342832077857	3.0030928990422483	360	Compound
Pi-_PNA+	2	403	0.49627791563275436	D09	09	D	W0002091	2.873342832077857	3.0030928990422483	360	Compound
Pi-_PNA-	237	403	58.80893300248139	D09	09	D	W0002091	2.873342832077857	3.0030928990422483	360	Compound
Pi+_PNA-	83	416	19.951923076923077	D10	10	D	W0002091	2.873342832077857	3.0030928990422483	360	Compound
Pi+_PNA+	85	416	20.432692307692307	D10	10	D	W0002091	2.873342832077857	3.0030928990422483	360	Compound
Pi-_PNA+	1	416	0.2403846153846154	D10	10	D	W0002091	2.873342832077857	3.0030928990422483	360	Compound
Pi-_PNA-	247	416	59.375	D10	10	D	W0002091	2.873342832077857	3.0030928990422483	360	Compound
Pi+_PNA-	110	470	23.404255319148938	D11	11	D	W0002091	2.873342832077857	3.0030928990422483	360	Compound
Pi+_PNA+	86	470	18.29787234042553	D11	11	D	W0002091	2.873342832077857	3.0030928990422483	360	Compound
Pi-_PNA+	3	470	0.6382978723404255	D11	11	D	W0002091	2.873342832077857	3.0030928990422483	360	Compound
Pi-_PNA-	271	470	57.659574468085104	D11	11	D	W0002091	2.873342832077857	3.0030928990422483	360	Compound
Pi+_PNA-	99	455	21.75824175824176	D12	12	D	W0002091	2.873342832077857	3.0030928990422483	360	Compound
Pi+_PNA+	89	455	19.560439560439562	D12	12	D	W0002091	2.873342832077857	3.0030928990422483	360	Compound
Pi-_PNA+	6	455	1.3186813186813187	D12	12	D	W0002091	2.873342832077857	3.0030928990422483	360	Compound
Pi-_PNA-	261	455	57.36263736263736	D12	12	D	W0002091	2.873342832077857	3.0030928990422483	360	Compound
Pi+_PNA-	97	448	21.651785714285715	D13	13	D	W0002091	2.873342832077857	3.0030928990422483	360	Compound
Pi+_PNA+	100	448	22.321428571428573	D13	13	D	W0002091	2.873342832077857	3.0030928990422483	360	Compound
Pi-_PNA+	4	448	0.8928571428571428	D13	13	D	W0002091	2.873342832077857	3.0030928990422483	360	Compound
Pi-_PNA-	247	448	55.13392857142857	D13	13	D	W0002091	2.873342832077857	3.0030928990422483	360	Compound
Pi+_PNA-	81	383	21.148825065274153	D14	14	D	W0002091	2.873342832077857	3.0030928990422483	360	Compound
Pi+_PNA+	59	383	15.404699738903393	D14	14	D	W0002091	2.873342832077857	3.0030928990422483	360	Compound
Pi-_PNA+	4	383	1.0443864229765014	D14	14	D	W0002091	2.873342832077857	3.0030928990422483	360	Compound
Pi-_PNA-	239	383	62.40208877284596	D14	14	D	W0002091	2.873342832077857	3.0030928990422483	360	Compound
Pi+_PNA-	105	392	26.785714285714285	D15	15	D	W0002091	2.873342832077857	3.0030928990422483	360	Compound
Pi+_PNA+	69	392	17.602040816326532	D15	15	D	W0002091	2.873342832077857	3.0030928990422483	360	Compound
Pi-_PNA+	5	392	1.2755102040816326	D15	15	D	W0002091	2.873342832077857	3.0030928990422483	360	Compound
Pi-_PNA-	213	392	54.33673469387755	D15	15	D	W0002091	2.873342832077857	3.0030928990422483	360	Compound
Pi+_PNA-	74	376	19.680851063829788	D16	16	D	W0002091	2.873342832077857	3.0030928990422483	360	Compound
Pi+_PNA+	59	376	15.691489361702127	D16	16	D	W0002091	2.873342832077857	3.0030928990422483	360	Compound
Pi-_PNA+	2	376	0.5319148936170213	D16	16	D	W0002091	2.873342832077857	3.0030928990422483	360	Compound
Pi-_PNA-	241	376	64.09574468085107	D16	16	D	W0002091	2.873342832077857	3.0030928990422483	360	Compound
Pi+_PNA-	84	410	20.48780487804878	D17	17	D	W0002091	2.873342832077857	3.0030928990422483	360	Compound
Pi+_PNA+	65	410	15.853658536585366	D17	17	D	W0002091	2.873342832077857	3.0030928990422483	360	Compound
Pi-_PNA+	3	410	0.7317073170731708	D17	17	D	W0002091	2.873342832077857	3.0030928990422483	360	Compound
Pi-_PNA-	258	410	62.926829268292686	D17	17	D	W0002091	2.873342832077857	3.0030928990422483	360	Compound
Pi+_PNA-	76	418	18.181818181818183	D18	18	D	W0002091	2.873342832077857	3.0030928990422483	360	Compound
Pi+_PNA+	69	418	16.507177033492823	D18	18	D	W0002091	2.873342832077857	3.0030928990422483	360	Compound
Pi-_PNA+	5	418	1.1961722488038278	D18	18	D	W0002091	2.873342832077857	3.0030928990422483	360	Compound
Pi-_PNA-	268	418	64.11483253588517	D18	18	D	W0002091	2.873342832077857	3.0030928990422483	360	Compound
Pi+_PNA-	86	421	20.42755344418052	D19	19	D	W0002091	2.873342832077857	3.0030928990422483	360	Compound
Pi+_PNA+	64	421	15.201900237529692	D19	19	D	W0002091	2.873342832077857	3.0030928990422483	360	Compound
Pi-_PNA+	3	421	0.7125890736342043	D19	19	D	W0002091	2.873342832077857	3.0030928990422483	360	Compound
Pi-_PNA-	268	421	63.657957244655584	D19	19	D	W0002091	2.873342832077857	3.0030928990422483	360	Compound
Pi+_PNA-	71	409	17.359413202933986	D20	20	D	W0002091	2.873342832077857	3.0030928990422483	360	Compound
Pi+_PNA+	62	409	15.158924205378973	D20	20	D	W0002091	2.873342832077857	3.0030928990422483	360	Compound
Pi-_PNA+	7	409	1.7114914425427872	D20	20	D	W0002091	2.873342832077857	3.0030928990422483	360	Compound
Pi-_PNA-	269	409	65.77017114914425	D20	20	D	W0002091	2.873342832077857	3.0030928990422483	360	Compound
Pi+_PNA-	71	357	19.88795518207283	D21	21	D	W0002091	2.873342832077857	3.0030928990422483	360	Compound
Pi+_PNA+	53	357	14.84593837535014	D21	21	D	W0002091	2.873342832077857	3.0030928990422483	360	Compound
Pi-_PNA+	1	357	0.2801120448179272	D21	21	D	W0002091	2.873342832077857	3.0030928990422483	360	Compound
Pi-_PNA-	232	357	64.9859943977591	D21	21	D	W0002091	2.873342832077857	3.0030928990422483	360	Compound
Pi+_PNA-	102	438	23.28767123287671	D22	22	D	W0002091	2.873342832077857	3.0030928990422483	360	Compound
Pi+_PNA+	66	438	15.068493150684931	D22	22	D	W0002091	2.873342832077857	3.0030928990422483	360	Compound
Pi-_PNA+	2	438	0.45662100456621	D22	22	D	W0002091	2.873342832077857	3.0030928990422483	360	Compound
Pi-_PNA-	268	438	61.18721461187214	D22	22	D	W0002091	2.873342832077857	3.0030928990422483	360	Compound
Pi+_PNA-	97	459	21.13289760348584	D23	23	D	W0002091	2.873342832077857	3.0030928990422483	360	Negative Control
Pi+_PNA+	69	459	15.032679738562091	D23	23	D	W0002091	2.873342832077857	3.0030928990422483	360	Negative Control
Pi-_PNA+	4	459	0.8714596949891068	D23	23	D	W0002091	2.873342832077857	3.0030928990422483	360	Negative Control
Pi-_PNA-	289	459	62.96296296296296	D23	23	D	W0002091	2.873342832077857	3.0030928990422483	360	Negative Control
Pi+_PNA-	105	532	19.736842105263158	D24	24	D	W0002091	2.873342832077857	3.0030928990422483	360	Positive Control
Pi+_PNA+	48	532	9.022556390977442	D24	24	D	W0002091	2.873342832077857	3.0030928990422483	360	Positive Control
Pi-_PNA+	24	532	4.511278195488721	D24	24	D	W0002091	2.873342832077857	3.0030928990422483	360	Positive Control
Pi-_PNA-	355	532	66.72932330827066	D24	24	D	W0002091	2.873342832077857	3.0030928990422483	360	Positive Control
Pi+_PNA-	80	545	14.678899082568808	E01	01	E	W0002091	2.873342832077857	3.0030928990422483	360	Compound
Pi+_PNA+	111	545	20.36697247706422	E01	01	E	W0002091	2.873342832077857	3.0030928990422483	360	Compound
Pi-_PNA+	2	545	0.3669724770642202	E01	01	E	W0002091	2.873342832077857	3.0030928990422483	360	Compound
Pi-_PNA-	352	545	64.58715596330276	E01	01	E	W0002091	2.873342832077857	3.0030928990422483	360	Compound
Pi+_PNA-	87	506	17.193675889328063	E02	02	E	W0002091	2.873342832077857	3.0030928990422483	360	Compound
Pi+_PNA+	119	506	23.517786561264824	E02	02	E	W0002091	2.873342832077857	3.0030928990422483	360	Compound
Pi-_PNA+	4	506	0.7905138339920948	E02	02	E	W0002091	2.873342832077857	3.0030928990422483	360	Compound
Pi-_PNA-	296	506	58.498023715415016	E02	02	E	W0002091	2.873342832077857	3.0030928990422483	360	Compound
Pi+_PNA-	65	486	13.374485596707819	E03	03	E	W0002091	2.873342832077857	3.0030928990422483	360	Compound
Pi+_PNA+	120	486	24.691358024691358	E03	03	E	W0002091	2.873342832077857	3.0030928990422483	360	Compound
Pi-_PNA+	6	486	1.2345679012345678	E03	03	E	W0002091	2.873342832077857	3.0030928990422483	360	Compound
Pi-_PNA-	295	486	60.69958847736625	E03	03	E	W0002091	2.873342832077857	3.0030928990422483	360	Compound
Pi+_PNA-	72	476	15.126050420168067	E04	04	E	W0002091	2.873342832077857	3.0030928990422483	360	Compound
Pi+_PNA+	97	476	20.3781512605042	E04	04	E	W0002091	2.873342832077857	3.0030928990422483	360	Compound
Pi-_PNA+	4	476	0.8403361344537815	E04	04	E	W0002091	2.873342832077857	3.0030928990422483	360	Compound
Pi-_PNA-	303	476	63.65546218487395	E04	04	E	W0002091	2.873342832077857	3.0030928990422483	360	Compound
Pi+_PNA-	57	371	15.363881401617252	E05	05	E	W0002091	2.873342832077857	3.0030928990422483	360	Compound
Pi+_PNA+	83	371	22.371967654986523	E05	05	E	W0002091	2.873342832077857	3.0030928990422483	360	Compound
Pi-_PNA+	4	371	1.078167115902965	E05	05	E	W0002091	2.873342832077857	3.0030928990422483	360	Compound
Pi-_PNA-	227	371	61.18598382749326	E05	05	E	W0002091	2.873342832077857	3.0030928990422483	360	Compound
Pi+_PNA-	79	420	18.80952380952381	E06	06	E	W0002091	2.873342832077857	3.0030928990422483	360	Compound
Pi+_PNA+	88	420	20.952380952380953	E06	06	E	W0002091	2.873342832077857	3.0030928990422483	360	Compound
Pi-_PNA+	4	420	0.9523809523809524	E06	06	E	W0002091	2.873342832077857	3.0030928990422483	360	Compound
Pi-_PNA-	249	420	59.285714285714285	E06	06	E	W0002091	2.873342832077857	3.0030928990422483	360	Compound
Pi+_PNA-	69	301	22.92358803986711	E07	07	E	W0002091	2.873342832077857	3.0030928990422483	360	Compound
Pi+_PNA+	61	301	20.26578073089701	E07	07	E	W0002091	2.873342832077857	3.0030928990422483	360	Compound
Pi-_PNA+	3	301	0.9966777408637874	E07	07	E	W0002091	2.873342832077857	3.0030928990422483	360	Compound
Pi-_PNA-	168	301	55.81395348837209	E07	07	E	W0002091	2.873342832077857	3.0030928990422483	360	Compound
Pi+_PNA-	64	395	16.20253164556962	E08	08	E	W0002091	2.873342832077857	3.0030928990422483	360	Compound
Pi+_PNA+	102	395	25.82278481012658	E08	08	E	W0002091	2.873342832077857	3.0030928990422483	360	Compound
Pi-_PNA+	10	395	2.5316455696202533	E08	08	E	W0002091	2.873342832077857	3.0030928990422483	360	Compound
Pi-_PNA-	219	395	55.44303797468354	E08	08	E	W0002091	2.873342832077857	3.0030928990422483	360	Compound
Pi+_PNA-	66	427	15.456674473067917	E09	09	E	W0002091	2.873342832077857	3.0030928990422483	360	Compound
Pi+_PNA+	96	427	22.482435597189696	E09	09	E	W0002091	2.873342832077857	3.0030928990422483	360	Compound
Pi-_PNA+	5	427	1.1709601873536302	E09	09	E	W0002091	2.873342832077857	3.0030928990422483	360	Compound
Pi-_PNA-	260	427	60.88992974238876	E09	09	E	W0002091	2.873342832077857	3.0030928990422483	360	Compound
Pi+_PNA-	72	489	14.723926380368098	E10	10	E	W0002091	2.873342832077857	3.0030928990422483	360	Compound
Pi+_PNA+	86	489	17.586912065439673	E10	10	E	W0002091	2.873342832077857	3.0030928990422483	360	Compound
Pi-_PNA+	1	489	0.2044989775051125	E10	10	E	W0002091	2.873342832077857	3.0030928990422483	360	Compound
Pi-_PNA-	330	489	67.48466257668711	E10	10	E	W0002091	2.873342832077857	3.0030928990422483	360	Compound
Pi+_PNA-	89	445	20	E11	11	E	W0002091	2.873342832077857	3.0030928990422483	360	Compound
Pi+_PNA+	81	445	18.202247191011235	E11	11	E	W0002091	2.873342832077857	3.0030928990422483	360	Compound
Pi-_PNA+	5	445	1.1235955056179776	E11	11	E	W0002091	2.873342832077857	3.0030928990422483	360	Compound
Pi-_PNA-	270	445	60.67415730337079	E11	11	E	W0002091	2.873342832077857	3.0030928990422483	360	Compound
Pi+_PNA-	64	465	13.763440860215054	E12	12	E	W0002091	2.873342832077857	3.0030928990422483	360	Compound
Pi+_PNA+	97	465	20.86021505376344	E12	12	E	W0002091	2.873342832077857	3.0030928990422483	360	Compound
Pi-_PNA+	4	465	0.8602150537634409	E12	12	E	W0002091	2.873342832077857	3.0030928990422483	360	Compound
Pi-_PNA-	300	465	64.51612903225806	E12	12	E	W0002091	2.873342832077857	3.0030928990422483	360	Compound
Pi+_PNA-	74	456	16.228070175438596	E13	13	E	W0002091	2.873342832077857	3.0030928990422483	360	Compound
Pi+_PNA+	80	456	17.543859649122805	E13	13	E	W0002091	2.873342832077857	3.0030928990422483	360	Compound
Pi-_PNA+	8	456	1.7543859649122806	E13	13	E	W0002091	2.873342832077857	3.0030928990422483	360	Compound
Pi-_PNA-	294	456	64.47368421052632	E13	13	E	W0002091	2.873342832077857	3.0030928990422483	360	Compound
Pi+_PNA-	48	410	11.707317073170733	E14	14	E	W0002091	2.873342832077857	3.0030928990422483	360	Compound
Pi+_PNA+	100	410	24.390243902439025	E14	14	E	W0002091	2.873342832077857	3.0030928990422483	360	Compound
Pi-_PNA+	5	410	1.2195121951219512	E14	14	E	W0002091	2.873342832077857	3.0030928990422483	360	Compound
Pi-_PNA-	257	410	62.68292682926829	E14	14	E	W0002091	2.873342832077857	3.0030928990422483	360	Compound
Pi+_PNA-	75	418	17.942583732057415	E15	15	E	W0002091	2.873342832077857	3.0030928990422483	360	Compound
Pi+_PNA+	84	418	20.095693779904305	E15	15	E	W0002091	2.873342832077857	3.0030928990422483	360	Compound
Pi-_PNA+	5	418	1.1961722488038278	E15	15	E	W0002091	2.873342832077857	3.0030928990422483	360	Compound
Pi-_PNA-	254	418	60.76555023923444	E15	15	E	W0002091	2.873342832077857	3.0030928990422483	360	Compound
Pi+_PNA-	58	412	14.077669902912621	E16	16	E	W0002091	2.873342832077857	3.0030928990422483	360	Compound
Pi+_PNA+	79	412	19.174757281553397	E16	16	E	W0002091	2.873342832077857	3.0030928990422483	360	Compound
Pi-_PNA+	6	412	1.4563106796116505	E16	16	E	W0002091	2.873342832077857	3.0030928990422483	360	Compound
Pi-_PNA-	269	412	65.29126213592234	E16	16	E	W0002091	2.873342832077857	3.0030928990422483	360	Compound
Pi+_PNA-	50	356	14.04494382022472	E17	17	E	W0002091	2.873342832077857	3.0030928990422483	360	Compound
Pi+_PNA+	75	356	21.06741573033708	E17	17	E	W0002091	2.873342832077857	3.0030928990422483	360	Compound
Pi-_PNA+	5	356	1.4044943820224718	E17	17	E	W0002091	2.873342832077857	3.0030928990422483	360	Compound
Pi-_PNA-	226	356	63.48314606741573	E17	17	E	W0002091	2.873342832077857	3.0030928990422483	360	Compound
Pi+_PNA-	47	422	11.137440758293838	E18	18	E	W0002091	2.873342832077857	3.0030928990422483	360	Compound
Pi+_PNA+	75	422	17.77251184834123	E18	18	E	W0002091	2.873342832077857	3.0030928990422483	360	Compound
Pi-_PNA+	4	422	0.9478672985781991	E18	18	E	W0002091	2.873342832077857	3.0030928990422483	360	Compound
Pi-_PNA-	296	422	70.14218009478674	E18	18	E	W0002091	2.873342832077857	3.0030928990422483	360	Compound
Pi+_PNA-	61	382	15.968586387434556	E19	19	E	W0002091	2.873342832077857	3.0030928990422483	360	Compound
Pi+_PNA+	77	382	20.157068062827225	E19	19	E	W0002091	2.873342832077857	3.0030928990422483	360	Compound
Pi-_PNA+	7	382	1.832460732984293	E19	19	E	W0002091	2.873342832077857	3.0030928990422483	360	Compound
Pi-_PNA-	237	382	62.04188481675392	E19	19	E	W0002091	2.873342832077857	3.0030928990422483	360	Compound
Pi+_PNA-	56	429	13.053613053613052	E20	20	E	W0002091	2.873342832077857	3.0030928990422483	360	Compound
Pi+_PNA+	90	429	20.97902097902098	E20	20	E	W0002091	2.873342832077857	3.0030928990422483	360	Compound
Pi-_PNA+	4	429	0.9324009324009324	E20	20	E	W0002091	2.873342832077857	3.0030928990422483	360	Compound
Pi-_PNA-	279	429	65.03496503496503	E20	20	E	W0002091	2.873342832077857	3.0030928990422483	360	Compound
Pi+_PNA-	60	382	15.706806282722512	E21	21	E	W0002091	2.873342832077857	3.0030928990422483	360	Compound
Pi+_PNA+	56	382	14.659685863874344	E21	21	E	W0002091	2.873342832077857	3.0030928990422483	360	Compound
Pi-_PNA+	3	382	0.7853403141361256	E21	21	E	W0002091	2.873342832077857	3.0030928990422483	360	Compound
Pi-_PNA-	263	382	68.84816753926701	E21	21	E	W0002091	2.873342832077857	3.0030928990422483	360	Compound
Pi+_PNA-	75	380	19.736842105263158	E22	22	E	W0002091	2.873342832077857	3.0030928990422483	360	Compound
Pi+_PNA+	84	380	22.105263157894736	E22	22	E	W0002091	2.873342832077857	3.0030928990422483	360	Compound
Pi-_PNA+	2	380	0.5263157894736842	E22	22	E	W0002091	2.873342832077857	3.0030928990422483	360	Compound
Pi-_PNA-	219	380	57.631578947368425	E22	22	E	W0002091	2.873342832077857	3.0030928990422483	360	Compound
Pi+_PNA-	63	391	16.11253196930946	E23	23	E	W0002091	2.873342832077857	3.0030928990422483	360	Negative Control
Pi+_PNA+	77	391	19.69309462915601	E23	23	E	W0002091	2.873342832077857	3.0030928990422483	360	Negative Control
Pi-_PNA+	4	391	1.0230179028132993	E23	23	E	W0002091	2.873342832077857	3.0030928990422483	360	Negative Control
Pi-_PNA-	247	391	63.171355498721226	E23	23	E	W0002091	2.873342832077857	3.0030928990422483	360	Negative Control
Pi+_PNA-	127	618	20.550161812297734	E24	24	E	W0002091	2.873342832077857	3.0030928990422483	360	Positive Control
Pi+_PNA+	4	618	0.6472491909385114	E24	24	E	W0002091	2.873342832077857	3.0030928990422483	360	Positive Control
Pi-_PNA+	4	618	0.6472491909385114	E24	24	E	W0002091	2.873342832077857	3.0030928990422483	360	Positive Control
Pi-_PNA-	483	618	78.15533980582524	E24	24	E	W0002091	2.873342832077857	3.0030928990422483	360	Positive Control
Pi+_PNA-	59	512	11.5234375	F01	01	F	W0002091	2.873342832077857	3.0030928990422483	360	Compound
Pi+_PNA+	89	512	17.3828125	F01	01	F	W0002091	2.873342832077857	3.0030928990422483	360	Compound
Pi-_PNA+	2	512	0.390625	F01	01	F	W0002091	2.873342832077857	3.0030928990422483	360	Compound
Pi-_PNA-	362	512	70.703125	F01	01	F	W0002091	2.873342832077857	3.0030928990422483	360	Compound
Pi+_PNA-	47	462	10.173160173160174	F02	02	F	W0002091	2.873342832077857	3.0030928990422483	360	Compound
Pi+_PNA+	111	462	24.025974025974026	F02	02	F	W0002091	2.873342832077857	3.0030928990422483	360	Compound
Pi-_PNA+	7	462	1.5151515151515151	F02	02	F	W0002091	2.873342832077857	3.0030928990422483	360	Compound
Pi-_PNA-	297	462	64.28571428571429	F02	02	F	W0002091	2.873342832077857	3.0030928990422483	360	Compound
Pi+_PNA-	60	479	12.526096033402922	F03	03	F	W0002091	2.873342832077857	3.0030928990422483	360	Compound
Pi+_PNA+	89	479	18.580375782881003	F03	03	F	W0002091	2.873342832077857	3.0030928990422483	360	Compound
Pi-_PNA+	4	479	0.8350730688935281	F03	03	F	W0002091	2.873342832077857	3.0030928990422483	360	Compound
Pi-_PNA-	326	479	68.05845511482255	F03	03	F	W0002091	2.873342832077857	3.0030928990422483	360	Compound
Pi+_PNA-	84	526	15.96958174904943	F04	04	F	W0002091	2.873342832077857	3.0030928990422483	360	Compound
Pi+_PNA+	89	526	16.920152091254753	F04	04	F	W0002091	2.873342832077857	3.0030928990422483	360	Compound
Pi-_PNA+	3	526	0.5703422053231939	F04	04	F	W0002091	2.873342832077857	3.0030928990422483	360	Compound
Pi-_PNA-	350	526	66.53992395437263	F04	04	F	W0002091	2.873342832077857	3.0030928990422483	360	Compound
Pi+_PNA-	41	402	10.199004975124378	F05	05	F	W0002091	2.873342832077857	3.0030928990422483	360	Compound
Pi+_PNA+	75	402	18.65671641791045	F05	05	F	W0002091	2.873342832077857	3.0030928990422483	360	Compound
Pi-_PNA+	11	402	2.736318407960199	F05	05	F	W0002091	2.873342832077857	3.0030928990422483	360	Compound
Pi-_PNA-	275	402	68.40796019900498	F05	05	F	W0002091	2.873342832077857	3.0030928990422483	360	Compound
Pi+_PNA-	56	438	12.785388127853881	F06	06	F	W0002091	2.873342832077857	3.0030928990422483	360	Compound
Pi+_PNA+	85	438	19.406392694063925	F06	06	F	W0002091	2.873342832077857	3.0030928990422483	360	Compound
Pi-_PNA+	6	438	1.36986301369863	F06	06	F	W0002091	2.873342832077857	3.0030928990422483	360	Compound
Pi-_PNA-	291	438	66.43835616438356	F06	06	F	W0002091	2.873342832077857	3.0030928990422483	360	Compound
Pi+_PNA-	58	457	12.691466083150985	F07	07	F	W0002091	2.873342832077857	3.0030928990422483	360	Compound
Pi+_PNA+	102	457	22.319474835886215	F07	07	F	W0002091	2.873342832077857	3.0030928990422483	360	Compound
Pi-_PNA+	6	457	1.312910284463895	F07	07	F	W0002091	2.873342832077857	3.0030928990422483	360	Compound
Pi-_PNA-	291	457	63.67614879649891	F07	07	F	W0002091	2.873342832077857	3.0030928990422483	360	Compound
Pi+_PNA-	66	432	15.277777777777779	F08	08	F	W0002091	2.873342832077857	3.0030928990422483	360	Compound
Pi+_PNA+	62	432	14.351851851851851	F08	08	F	W0002091	2.873342832077857	3.0030928990422483	360	Compound
Pi-_PNA+	6	432	1.3888888888888888	F08	08	F	W0002091	2.873342832077857	3.0030928990422483	360	Compound
Pi-_PNA-	298	432	68.98148148148148	F08	08	F	W0002091	2.873342832077857	3.0030928990422483	360	Compound
Pi+_PNA-	74	482	15.352697095435685	F09	09	F	W0002091	2.873342832077857	3.0030928990422483	360	Compound
Pi+_PNA+	101	482	20.95435684647303	F09	09	F	W0002091	2.873342832077857	3.0030928990422483	360	Compound
Pi-_PNA+	6	482	1.2448132780082988	F09	09	F	W0002091	2.873342832077857	3.0030928990422483	360	Compound
Pi-_PNA-	301	482	62.448132780082986	F09	09	F	W0002091	2.873342832077857	3.0030928990422483	360	Compound
Pi+_PNA-	61	356	17.134831460674157	F10	10	F	W0002091	2.873342832077857	3.0030928990422483	360	Compound
Pi+_PNA+	74	356	20.786516853932586	F10	10	F	W0002091	2.873342832077857	3.0030928990422483	360	Compound
Pi-_PNA+	2	356	0.5617977528089888	F10	10	F	W0002091	2.873342832077857	3.0030928990422483	360	Compound
Pi-_PNA-	219	356	61.51685393258427	F10	10	F	W0002091	2.873342832077857	3.0030928990422483	360	Compound
Pi+_PNA-	59	422	13.981042654028435	F11	11	F	W0002091	2.873342832077857	3.0030928990422483	360	Compound
Pi+_PNA+	94	422	22.274881516587676	F11	11	F	W0002091	2.873342832077857	3.0030928990422483	360	Compound
Pi-_PNA+	3	422	0.7109004739336493	F11	11	F	W0002091	2.873342832077857	3.0030928990422483	360	Compound
Pi-_PNA-	266	422	63.03317535545023	F11	11	F	W0002091	2.873342832077857	3.0030928990422483	360	Compound
Pi+_PNA-	51	456	11.18421052631579	F12	12	F	W0002091	2.873342832077857	3.0030928990422483	360	Compound
Pi+_PNA+	68	456	14.912280701754385	F12	12	F	W0002091	2.873342832077857	3.0030928990422483	360	Compound
Pi-_PNA+	1	456	0.21929824561403508	F12	12	F	W0002091	2.873342832077857	3.0030928990422483	360	Compound
Pi-_PNA-	336	456	73.68421052631578	F12	12	F	W0002091	2.873342832077857	3.0030928990422483	360	Compound
Pi+_PNA-	52	420	12.380952380952381	F13	13	F	W0002091	2.873342832077857	3.0030928990422483	360	Compound
Pi+_PNA+	61	420	14.523809523809526	F13	13	F	W0002091	2.873342832077857	3.0030928990422483	360	Compound
Pi-_PNA+	2	420	0.4761904761904762	F13	13	F	W0002091	2.873342832077857	3.0030928990422483	360	Compound
Pi-_PNA-	305	420	72.61904761904762	F13	13	F	W0002091	2.873342832077857	3.0030928990422483	360	Compound
Pi+_PNA-	70	556	12.589928057553957	F14	14	F	W0002091	2.873342832077857	3.0030928990422483	360	Compound
Pi+_PNA+	98	556	17.62589928057554	F14	14	F	W0002091	2.873342832077857	3.0030928990422483	360	Compound
Pi-_PNA+	6	556	1.079136690647482	F14	14	F	W0002091	2.873342832077857	3.0030928990422483	360	Compound
Pi-_PNA-	382	556	68.70503597122301	F14	14	F	W0002091	2.873342832077857	3.0030928990422483	360	Compound
Pi+_PNA-	67	419	15.990453460620524	F15	15	F	W0002091	2.873342832077857	3.0030928990422483	360	Compound
Pi+_PNA+	97	419	23.15035799522673	F15	15	F	W0002091	2.873342832077857	3.0030928990422483	360	Compound
Pi-_PNA+	5	419	1.1933174224343674	F15	15	F	W0002091	2.873342832077857	3.0030928990422483	360	Compound
Pi-_PNA-	250	419	59.665871121718375	F15	15	F	W0002091	2.873342832077857	3.0030928990422483	360	Compound
Pi+_PNA-	62	395	15.69620253164557	F16	16	F	W0002091	2.873342832077857	3.0030928990422483	360	Compound
Pi+_PNA+	64	395	16.20253164556962	F16	16	F	W0002091	2.873342832077857	3.0030928990422483	360	Compound
Pi-_PNA+	4	395	1.0126582278481013	F16	16	F	W0002091	2.873342832077857	3.0030928990422483	360	Compound
Pi-_PNA-	265	395	67.08860759493672	F16	16	F	W0002091	2.873342832077857	3.0030928990422483	360	Compound
Pi+_PNA-	65	398	16.331658291457288	F17	17	F	W0002091	2.873342832077857	3.0030928990422483	360	Compound
Pi+_PNA+	71	398	17.839195979899497	F17	17	F	W0002091	2.873342832077857	3.0030928990422483	360	Compound
Pi-_PNA+	7	398	1.7587939698492463	F17	17	F	W0002091	2.873342832077857	3.0030928990422483	360	Compound
Pi-_PNA-	255	398	64.07035175879398	F17	17	F	W0002091	2.873342832077857	3.0030928990422483	360	Compound
Pi+_PNA-	63	436	14.449541284403669	F18	18	F	W0002091	2.873342832077857	3.0030928990422483	360	Compound
Pi+_PNA+	83	436	19.03669724770642	F18	18	F	W0002091	2.873342832077857	3.0030928990422483	360	Compound
Pi-_PNA+	3	436	0.6880733944954129	F18	18	F	W0002091	2.873342832077857	3.0030928990422483	360	Compound
Pi-_PNA-	287	436	65.82568807339449	F18	18	F	W0002091	2.873342832077857	3.0030928990422483	360	Compound
Pi+_PNA-	93	576	16.145833333333336	F19	19	F	W0002091	2.873342832077857	3.0030928990422483	360	Compound
Pi+_PNA+	123	576	21.354166666666664	F19	19	F	W0002091	2.873342832077857	3.0030928990422483	360	Compound
Pi-_PNA+	6	576	1.0416666666666665	F19	19	F	W0002091	2.873342832077857	3.0030928990422483	360	Compound
Pi-_PNA-	354	576	61.458333333333336	F19	19	F	W0002091	2.873342832077857	3.0030928990422483	360	Compound
Pi+_PNA-	62	444	13.963963963963963	F20	20	F	W0002091	2.873342832077857	3.0030928990422483	360	Compound
Pi+_PNA+	79	444	17.792792792792792	F20	20	F	W0002091	2.873342832077857	3.0030928990422483	360	Compound
Pi-_PNA+	8	444	1.8018018018018018	F20	20	F	W0002091	2.873342832077857	3.0030928990422483	360	Compound
Pi-_PNA-	295	444	66.44144144144144	F20	20	F	W0002091	2.873342832077857	3.0030928990422483	360	Compound
Pi+_PNA-	63	382	16.49214659685864	F21	21	F	W0002091	2.873342832077857	3.0030928990422483	360	Compound
Pi+_PNA+	56	382	14.659685863874344	F21	21	F	W0002091	2.873342832077857	3.0030928990422483	360	Compound
Pi-_PNA+	7	382	1.832460732984293	F21	21	F	W0002091	2.873342832077857	3.0030928990422483	360	Compound
Pi-_PNA-	256	382	67.01570680628272	F21	21	F	W0002091	2.873342832077857	3.0030928990422483	360	Compound
Pi+_PNA-	72	492	14.634146341463413	F22	22	F	W0002091	2.873342832077857	3.0030928990422483	360	Compound
Pi+_PNA+	59	492	11.991869918699187	F22	22	F	W0002091	2.873342832077857	3.0030928990422483	360	Compound
Pi-_PNA+	2	492	0.40650406504065045	F22	22	F	W0002091	2.873342832077857	3.0030928990422483	360	Compound
Pi-_PNA-	359	492	72.96747967479675	F22	22	F	W0002091	2.873342832077857	3.0030928990422483	360	Compound
Pi+_PNA-	65	362	17.955801104972377	F23	23	F	W0002091	2.873342832077857	3.0030928990422483	360	Negative Control
Pi+_PNA+	51	362	14.088397790055248	F23	23	F	W0002091	2.873342832077857	3.0030928990422483	360	Negative Control
Pi-_PNA+	2	362	0.5524861878453038	F23	23	F	W0002091	2.873342832077857	3.0030928990422483	360	Negative Control
Pi-_PNA-	244	362	67.40331491712708	F23	23	F	W0002091	2.873342832077857	3.0030928990422483	360	Negative Control
Pi+_PNA-	108	730	14.794520547945206	F24	24	F	W0002091	2.873342832077857	3.0030928990422483	360	Positive Control
Pi+_PNA+	55	730	7.534246575342466	F24	24	F	W0002091	2.873342832077857	3.0030928990422483	360	Positive Control
Pi-_PNA+	11	730	1.5068493150684932	F24	24	F	W0002091	2.873342832077857	3.0030928990422483	360	Positive Control
Pi-_PNA-	556	730	76.16438356164383	F24	24	F	W0002091	2.873342832077857	3.0030928990422483	360	Positive Control
Pi+_PNA-	130	584	22.26027397260274	G01	01	G	W0002091	2.873342832077857	3.0030928990422483	360	Compound
Pi+_PNA+	79	584	13.527397260273974	G01	01	G	W0002091	2.873342832077857	3.0030928990422483	360	Compound
Pi-_PNA+	3	584	0.5136986301369862	G01	01	G	W0002091	2.873342832077857	3.0030928990422483	360	Compound
Pi-_PNA-	372	584	63.6986301369863	G01	01	G	W0002091	2.873342832077857	3.0030928990422483	360	Compound
Pi+_PNA-	77	506	15.217391304347828	G02	02	G	W0002091	2.873342832077857	3.0030928990422483	360	Compound
Pi+_PNA+	85	506	16.798418972332016	G02	02	G	W0002091	2.873342832077857	3.0030928990422483	360	Compound
Pi-_PNA+	2	506	0.3952569169960474	G02	02	G	W0002091	2.873342832077857	3.0030928990422483	360	Compound
Pi-_PNA-	342	506	67.58893280632411	G02	02	G	W0002091	2.873342832077857	3.0030928990422483	360	Compound
Pi+_PNA-	85	475	17.894736842105264	G03	03	G	W0002091	2.873342832077857	3.0030928990422483	360	Compound
Pi+_PNA+	61	475	12.842105263157894	G03	03	G	W0002091	2.873342832077857	3.0030928990422483	360	Compound
Pi-_PNA+	2	475	0.42105263157894735	G03	03	G	W0002091	2.873342832077857	3.0030928990422483	360	Compound
Pi-_PNA-	327	475	68.84210526315789	G03	03	G	W0002091	2.873342832077857	3.0030928990422483	360	Compound
Pi+_PNA-	96	470	20.425531914893615	G04	04	G	W0002091	2.873342832077857	3.0030928990422483	360	Compound
Pi+_PNA+	77	470	16.382978723404253	G04	04	G	W0002091	2.873342832077857	3.0030928990422483	360	Compound
Pi-_PNA+	5	470	1.0638297872340425	G04	04	G	W0002091	2.873342832077857	3.0030928990422483	360	Compound
Pi-_PNA-	292	470	62.12765957446808	G04	04	G	W0002091	2.873342832077857	3.0030928990422483	360	Compound
Pi+_PNA-	81	487	16.632443531827516	G05	05	G	W0002091	2.873342832077857	3.0030928990422483	360	Compound
Pi+_PNA+	81	487	16.632443531827516	G05	05	G	W0002091	2.873342832077857	3.0030928990422483	360	Compound
Pi-_PNA+	2	487	0.41067761806981523	G05	05	G	W0002091	2.873342832077857	3.0030928990422483	360	Compound
Pi-_PNA-	323	487	66.32443531827515	G05	05	G	W0002091	2.873342832077857	3.0030928990422483	360	Compound
Pi+_PNA-	82	446	18.385650224215247	G06	06	G	W0002091	2.873342832077857	3.0030928990422483	360	Compound
Pi+_PNA+	95	446	21.300448430493272	G06	06	G	W0002091	2.873342832077857	3.0030928990422483	360	Compound
Pi-_PNA+	8	446	1.7937219730941705	G06	06	G	W0002091	2.873342832077857	3.0030928990422483	360	Compound
Pi-_PNA-	261	446	58.52017937219731	G06	06	G	W0002091	2.873342832077857	3.0030928990422483	360	Compound
Pi+_PNA-	80	399	20.050125313283207	G07	07	G	W0002091	2.873342832077857	3.0030928990422483	360	Compound
Pi+_PNA+	77	399	19.298245614035086	G07	07	G	W0002091	2.873342832077857	3.0030928990422483	360	Compound
Pi-_PNA+	2	399	0.5012531328320802	G07	07	G	W0002091	2.873342832077857	3.0030928990422483	360	Compound
Pi-_PNA-	240	399	60.150375939849624	G07	07	G	W0002091	2.873342832077857	3.0030928990422483	360	Compound
Pi+_PNA-	78	393	19.84732824427481	G08	08	G	W0002091	2.873342832077857	3.0030928990422483	360	Compound
Pi+_PNA+	60	393	15.267175572519085	G08	08	G	W0002091	2.873342832077857	3.0030928990422483	360	Compound
Pi-_PNA+	0	393	0	G08	08	G	W0002091	2.873342832077857	3.0030928990422483	360	Compound
Pi-_PNA-	255	393	64.8854961832061	G08	08	G	W0002091	2.873342832077857	3.0030928990422483	360	Compound
Pi+_PNA-	70	433	16.166281755196305	G09	09	G	W0002091	2.873342832077857	3.0030928990422483	360	Compound
Pi+_PNA+	66	433	15.242494226327944	G09	09	G	W0002091	2.873342832077857	3.0030928990422483	360	Compound
Pi-_PNA+	3	433	0.6928406466512702	G09	09	G	W0002091	2.873342832077857	3.0030928990422483	360	Compound
Pi-_PNA-	294	433	67.89838337182448	G09	09	G	W0002091	2.873342832077857	3.0030928990422483	360	Compound
Pi+_PNA-	55	342	16.08187134502924	G10	10	G	W0002091	2.873342832077857	3.0030928990422483	360	Compound
Pi+_PNA+	54	342	15.789473684210526	G10	10	G	W0002091	2.873342832077857	3.0030928990422483	360	Compound
Pi-_PNA+	1	342	0.29239766081871343	G10	10	G	W0002091	2.873342832077857	3.0030928990422483	360	Compound
Pi-_PNA-	232	342	67.83625730994152	G10	10	G	W0002091	2.873342832077857	3.0030928990422483	360	Compound
Pi+_PNA-	69	384	17.96875	G11	11	G	W0002091	2.873342832077857	3.0030928990422483	360	Compound
Pi+_PNA+	46	384	11.979166666666668	G11	11	G	W0002091	2.873342832077857	3.0030928990422483	360	Compound
Pi-_PNA+	0	384	0	G11	11	G	W0002091	2.873342832077857	3.0030928990422483	360	Compound
Pi-_PNA-	269	384	70.05208333333334	G11	11	G	W0002091	2.873342832077857	3.0030928990422483	360	Compound
Pi+_PNA-	42	279	15.053763440860216	G12	12	G	W0002091	2.873342832077857	3.0030928990422483	360	Compound
Pi+_PNA+	27	279	9.67741935483871	G12	12	G	W0002091	2.873342832077857	3.0030928990422483	360	Compound
Pi-_PNA+	3	279	1.0752688172043012	G12	12	G	W0002091	2.873342832077857	3.0030928990422483	360	Compound
Pi-_PNA-	207	279	74.19354838709677	G12	12	G	W0002091	2.873342832077857	3.0030928990422483	360	Compound
Pi+_PNA-	57	381	14.960629921259844	G13	13	G	W0002091	2.873342832077857	3.0030928990422483	360	Compound
Pi+_PNA+	54	381	14.173228346456693	G13	13	G	W0002091	2.873342832077857	3.0030928990422483	360	Compound
Pi-_PNA+	1	381	0.26246719160104987	G13	13	G	W0002091	2.873342832077857	3.0030928990422483	360	Compound
Pi-_PNA-	269	381	70.60367454068242	G13	13	G	W0002091	2.873342832077857	3.0030928990422483	360	Compound
Pi+_PNA-	100	521	19.193857965451055	G14	14	G	W0002091	2.873342832077857	3.0030928990422483	360	Compound
Pi+_PNA+	88	521	16.89059500959693	G14	14	G	W0002091	2.873342832077857	3.0030928990422483	360	Compound
Pi-_PNA+	2	521	0.3838771593090211	G14	14	G	W0002091	2.873342832077857	3.0030928990422483	360	Compound
Pi-_PNA-	331	521	63.53166986564299	G14	14	G	W0002091	2.873342832077857	3.0030928990422483	360	Compound
Pi+_PNA-	81	423	19.148936170212767	G15	15	G	W0002091	2.873342832077857	3.0030928990422483	360	Compound
Pi+_PNA+	56	423	13.238770685579196	G15	15	G	W0002091	2.873342832077857	3.0030928990422483	360	Compound
Pi-_PNA+	2	423	0.4728132387706856	G15	15	G	W0002091	2.873342832077857	3.0030928990422483	360	Compound
Pi-_PNA-	284	423	67.139479905437355	G15	15	G	W0002091	2.873342832077857	3.0030928990422483	360	Compound
Pi+_PNA-	65	377	17.24137931034483	G16	16	G	W0002091	2.873342832077857	3.0030928990422483	360	Compound
Pi+_PNA+	62	377	16.445623342175068	G16	16	G	W0002091	2.873342832077857	3.0030928990422483	360	Compound
Pi-_PNA+	1	377	0.2652519893899204	G16	16	G	W0002091	2.873342832077857	3.0030928990422483	360	Compound
Pi-_PNA-	249	377	66.04774535809018	G16	16	G	W0002091	2.873342832077857	3.0030928990422483	360	Compound
Pi+_PNA-	58	426	13.615023474178404	G17	17	G	W0002091	2.873342832077857	3.0030928990422483	360	Compound
Pi+_PNA+	70	426	16.431924882629108	G17	17	G	W0002091	2.873342832077857	3.0030928990422483	360	Compound
Pi-_PNA+	6	426	1.4084507042253522	G17	17	G	W0002091	2.873342832077857	3.0030928990422483	360	Compound
Pi-_PNA-	292	426	68.54460093896714	G17	17	G	W0002091	2.873342832077857	3.0030928990422483	360	Compound
Pi+_PNA-	47	312	15.064102564102564	G18	18	G	W0002091	2.873342832077857	3.0030928990422483	360	Compound
Pi+_PNA+	50	312	16.025641025641026	G18	18	G	W0002091	2.873342832077857	3.0030928990422483	360	Compound
Pi-_PNA+	4	312	1.282051282051282	G18	18	G	W0002091	2.873342832077857	3.0030928990422483	360	Compound
Pi-_PNA-	211	312	67.62820512820514	G18	18	G	W0002091	2.873342832077857	3.0030928990422483	360	Compound
Pi+_PNA-	79	468	16.88034188034188	G19	19	G	W0002091	2.873342832077857	3.0030928990422483	360	Compound
Pi+_PNA+	58	468	12.393162393162394	G19	19	G	W0002091	2.873342832077857	3.0030928990422483	360	Compound
Pi-_PNA+	3	468	0.641025641025641	G19	19	G	W0002091	2.873342832077857	3.0030928990422483	360	Compound
Pi-_PNA-	328	468	70.08547008547008	G19	19	G	W0002091	2.873342832077857	3.0030928990422483	360	Compound
Pi+_PNA-	62	310	20	G20	20	G	W0002091	2.873342832077857	3.0030928990422483	360	Compound
Pi+_PNA+	47	310	15.161290322580644	G20	20	G	W0002091	2.873342832077857	3.0030928990422483	360	Compound
Pi-_PNA+	2	310	0.6451612903225806	G20	20	G	W0002091	2.873342832077857	3.0030928990422483	360	Compound
Pi-_PNA-	199	310	64.19354838709678	G20	20	G	W0002091	2.873342832077857	3.0030928990422483	360	Compound
Pi+_PNA-	48	288	16.666666666666664	G21	21	G	W0002091	2.873342832077857	3.0030928990422483	360	Compound
Pi+_PNA+	43	288	14.930555555555555	G21	21	G	W0002091	2.873342832077857	3.0030928990422483	360	Compound
Pi-_PNA+	3	288	1.0416666666666665	G21	21	G	W0002091	2.873342832077857	3.0030928990422483	360	Compound
Pi-_PNA-	194	288	67.36111111111111	G21	21	G	W0002091	2.873342832077857	3.0030928990422483	360	Compound
Pi+_PNA-	63	425	14.823529411764705	G22	22	G	W0002091	2.873342832077857	3.0030928990422483	360	Compound
Pi+_PNA+	76	425	17.88235294117647	G22	22	G	W0002091	2.873342832077857	3.0030928990422483	360	Compound
Pi-_PNA+	4	425	0.9411764705882352	G22	22	G	W0002091	2.873342832077857	3.0030928990422483	360	Compound
Pi-_PNA-	282	425	66.3529411764706	G22	22	G	W0002091	2.873342832077857	3.0030928990422483	360	Compound
Pi+_PNA-	89	387	22.997416020671835	G23	23	G	W0002091	2.873342832077857	3.0030928990422483	360	Negative Control
Pi+_PNA+	60	387	15.503875968992247	G23	23	G	W0002091	2.873342832077857	3.0030928990422483	360	Negative Control
Pi-_PNA+	8	387	2.0671834625323	G23	23	G	W0002091	2.873342832077857	3.0030928990422483	360	Negative Control
Pi-_PNA-	230	387	59.43152454780362	G23	23	G	W0002091	2.873342832077857	3.0030928990422483	360	Negative Control
Pi+_PNA-	95	502	18.92430278884462	G24	24	G	W0002091	2.873342832077857	3.0030928990422483	360	Positive Control
Pi+_PNA+	36	502	7.171314741035857	G24	24	G	W0002091	2.873342832077857	3.0030928990422483	360	Positive Control
Pi-_PNA+	2	502	0.398406374501992	G24	24	G	W0002091	2.873342832077857	3.0030928990422483	360	Positive Control
Pi-_PNA-	369	502	73.50597609561753	G24	24	G	W0002091	2.873342832077857	3.0030928990422483	360	Positive Control
Pi+_PNA-	73	539	13.543599257884972	H01	01	H	W0002091	2.873342832077857	3.0030928990422483	360	Compound
Pi+_PNA+	84	539	15.584415584415584	H01	01	H	W0002091	2.873342832077857	3.0030928990422483	360	Compound
Pi-_PNA+	1	539	0.1855287569573284	H01	01	H	W0002091	2.873342832077857	3.0030928990422483	360	Compound
Pi-_PNA-	381	539	70.68645640074212	H01	01	H	W0002091	2.873342832077857	3.0030928990422483	360	Compound
Pi+_PNA-	100	530	18.867924528301888	H02	02	H	W0002091	2.873342832077857	3.0030928990422483	360	Compound
Pi+_PNA+	75	530	14.150943396226415	H02	02	H	W0002091	2.873342832077857	3.0030928990422483	360	Compound
Pi-_PNA+	6	530	1.1320754716981132	H02	02	H	W0002091	2.873342832077857	3.0030928990422483	360	Compound
Pi-_PNA-	349	530	65.84905660377358	H02	02	H	W0002091	2.873342832077857	3.0030928990422483	360	Compound
Pi+_PNA-	75	421	17.81472684085511	H03	03	H	W0002091	2.873342832077857	3.0030928990422483	360	Compound
Pi+_PNA+	61	421	14.489311163895488	H03	03	H	W0002091	2.873342832077857	3.0030928990422483	360	Compound
Pi-_PNA+	1	421	0.23752969121140144	H03	03	H	W0002091	2.873342832077857	3.0030928990422483	360	Compound
Pi-_PNA-	284	421	67.45843230403801	H03	03	H	W0002091	2.873342832077857	3.0030928990422483	360	Compound
Pi+_PNA-	75	435	17.24137931034483	H04	04	H	W0002091	2.873342832077857	3.0030928990422483	360	Compound
Pi+_PNA+	62	435	14.25287356321839	H04	04	H	W0002091	2.873342832077857	3.0030928990422483	360	Compound
Pi-_PNA+	2	435	0.45977011494252873	H04	04	H	W0002091	2.873342832077857	3.0030928990422483	360	Compound
Pi-_PNA-	296	435	68.04597701149426	H04	04	H	W0002091	2.873342832077857	3.0030928990422483	360	Compound
Pi+_PNA-	73	472	15.466101694915254	H05	05	H	W0002091	2.873342832077857	3.0030928990422483	360	Compound
Pi+_PNA+	69	472	14.61864406779661	H05	05	H	W0002091	2.873342832077857	3.0030928990422483	360	Compound
Pi-_PNA+	2	472	0.423728813559322	H05	05	H	W0002091	2.873342832077857	3.0030928990422483	360	Compound
Pi-_PNA-	328	472	69.49152542372882	H05	05	H	W0002091	2.873342832077857	3.0030928990422483	360	Compound
Pi+_PNA-	60	366	16.39344262295082	H06	06	H	W0002091	2.873342832077857	3.0030928990422483	360	Compound
Pi+_PNA+	63	366	17.21311475409836	H06	06	H	W0002091	2.873342832077857	3.0030928990422483	360	Compound
Pi-_PNA+	3	366	0.819672131147541	H06	06	H	W0002091	2.873342832077857	3.0030928990422483	360	Compound
Pi-_PNA-	240	366	65.57377049180327	H06	06	H	W0002091	2.873342832077857	3.0030928990422483	360	Compound
Pi+_PNA-	70	369	18.97018970189702	H07	07	H	W0002091	2.873342832077857	3.0030928990422483	360	Compound
Pi+_PNA+	50	369	13.550135501355012	H07	07	H	W0002091	2.873342832077857	3.0030928990422483	360	Compound
Pi-_PNA+	0	369	0	H07	07	H	W0002091	2.873342832077857	3.0030928990422483	360	Compound
Pi-_PNA-	249	369	67.47967479674797	H07	07	H	W0002091	2.873342832077857	3.0030928990422483	360	Compound
Pi+_PNA-	57	316	18.037974683544302	H08	08	H	W0002091	2.873342832077857	3.0030928990422483	360	Compound
Pi+_PNA+	52	316	16.455696202531644	H08	08	H	W0002091	2.873342832077857	3.0030928990422483	360	Compound
Pi-_PNA+	1	316	0.31645569620253167	H08	08	H	W0002091	2.873342832077857	3.0030928990422483	360	Compound
Pi-_PNA-	206	316	65.18987341772153	H08	08	H	W0002091	2.873342832077857	3.0030928990422483	360	Compound
Pi+_PNA-	50	305	16.39344262295082	H09	09	H	W0002091	2.873342832077857	3.0030928990422483	360	Compound
Pi+_PNA+	58	305	19.01639344262295	H09	09	H	W0002091	2.873342832077857	3.0030928990422483	360	Compound
Pi-_PNA+	1	305	0.32786885245901637	H09	09	H	W0002091	2.873342832077857	3.0030928990422483	360	Compound
Pi-_PNA-	196	305	64.26229508196721	H09	09	H	W0002091	2.873342832077857	3.0030928990422483	360	Compound
Pi+_PNA-	52	371	14.016172506738545	H10	10	H	W0002091	2.873342832077857	3.0030928990422483	360	Compound
Pi+_PNA+	56	371	15.09433962264151	H10	10	H	W0002091	2.873342832077857	3.0030928990422483	360	Compound
Pi-_PNA+	2	371	0.5390835579514826	H10	10	H	W0002091	2.873342832077857	3.0030928990422483	360	Compound
Pi-_PNA-	261	371	70.35040431266847	H10	10	H	W0002091	2.873342832077857	3.0030928990422483	360	Compound
Pi+_PNA-	65	397	16.3727959697733	H11	11	H	W0002091	2.873342832077857	3.0030928990422483	360	Compound
Pi+_PNA+	48	397	12.090680100755668	H11	11	H	W0002091	2.873342832077857	3.0030928990422483	360	Compound
Pi-_PNA+	4	397	1.0075566750629723	H11	11	H	W0002091	2.873342832077857	3.0030928990422483	360	Compound
Pi-_PNA-	280	397	70.52896725440806	H11	11	H	W0002091	2.873342832077857	3.0030928990422483	360	Compound
Pi+_PNA-	58	380	15.263157894736842	H12	12	H	W0002091	2.873342832077857	3.0030928990422483	360	Compound
Pi+_PNA+	49	380	12.894736842105264	H12	12	H	W0002091	2.873342832077857	3.0030928990422483	360	Compound
Pi-_PNA+	3	380	0.7894736842105263	H12	12	H	W0002091	2.873342832077857	3.0030928990422483	360	Compound
Pi-_PNA-	270	380	71.05263157894737	H12	12	H	W0002091	2.873342832077857	3.0030928990422483	360	Compound
Pi+_PNA-	56	404	13.861386138613863	H13	13	H	W0002091	2.873342832077857	3.0030928990422483	360	Compound
Pi+_PNA+	39	404	9.653465346534654	H13	13	H	W0002091	2.873342832077857	3.0030928990422483	360	Compound
Pi-_PNA+	5	404	1.2376237623762376	H13	13	H	W0002091	2.873342832077857	3.0030928990422483	360	Compound
Pi-_PNA-	304	404	75.24752475247524	H13	13	H	W0002091	2.873342832077857	3.0030928990422483	360	Compound
Pi+_PNA-	58	460	12.608695652173912	H14	14	H	W0002091	2.873342832077857	3.0030928990422483	360	Compound
Pi+_PNA+	75	460	16.304347826086957	H14	14	H	W0002091	2.873342832077857	3.0030928990422483	360	Compound
Pi-_PNA+	6	460	1.3043478260869565	H14	14	H	W0002091	2.873342832077857	3.0030928990422483	360	Compound
Pi-_PNA-	321	460	69.78260869565217	H14	14	H	W0002091	2.873342832077857	3.0030928990422483	360	Compound
Pi+_PNA-	82	384	21.354166666666664	H15	15	H	W0002091	2.873342832077857	3.0030928990422483	360	Compound
Pi+_PNA+	52	384	13.541666666666666	H15	15	H	W0002091	2.873342832077857	3.0030928990422483	360	Compound
Pi-_PNA+	1	384	0.26041666666666663	H15	15	H	W0002091	2.873342832077857	3.0030928990422483	360	Compound
Pi-_PNA-	249	384	64.84375	H15	15	H	W0002091	2.873342832077857	3.0030928990422483	360	Compound
Pi+_PNA-	70	407	17.1990171990172	H16	16	H	W0002091	2.873342832077857	3.0030928990422483	360	Compound
Pi+_PNA+	62	407	15.233415233415235	H16	16	H	W0002091	2.873342832077857	3.0030928990422483	360	Compound
Pi-_PNA+	8	407	1.9656019656019657	H16	16	H	W0002091	2.873342832077857	3.0030928990422483	360	Compound
Pi-_PNA-	267	407	65.6019656019656	H16	16	H	W0002091	2.873342832077857	3.0030928990422483	360	Compound
Pi+_PNA-	67	388	17.2680412371134	H17	17	H	W0002091	2.873342832077857	3.0030928990422483	360	Compound
Pi+_PNA+	61	388	15.721649484536082	H17	17	H	W0002091	2.873342832077857	3.0030928990422483	360	Compound
Pi-_PNA+	8	388	2.0618556701030926	H17	17	H	W0002091	2.873342832077857	3.0030928990422483	360	Compound
Pi-_PNA-	252	388	64.94845360824742	H17	17	H	W0002091	2.873342832077857	3.0030928990422483	360	Compound
Pi+_PNA-	97	418	23.205741626794257	H18	18	H	W0002091	2.873342832077857	3.0030928990422483	360	Compound
Pi+_PNA+	73	418	17.464114832535884	H18	18	H	W0002091	2.873342832077857	3.0030928990422483	360	Compound
Pi-_PNA+	1	418	0.23923444976076555	H18	18	H	W0002091	2.873342832077857	3.0030928990422483	360	Compound
Pi-_PNA-	247	418	59.09090909090909	H18	18	H	W0002091	2.873342832077857	3.0030928990422483	360	Compound
Pi+_PNA-	59	368	16.032608695652172	H19	19	H	W0002091	2.873342832077857	3.0030928990422483	360	Compound
Pi+_PNA+	44	368	11.956521739130435	H19	19	H	W0002091	2.873342832077857	3.0030928990422483	360	Compound
Pi-_PNA+	0	368	0	H19	19	H	W0002091	2.873342832077857	3.0030928990422483	360	Compound
Pi-_PNA-	265	368	72.01086956521739	H19	19	H	W0002091	2.873342832077857	3.0030928990422483	360	Compound
Pi+_PNA-	58	299	19.39799331103679	H20	20	H	W0002091	2.873342832077857	3.0030928990422483	360	Compound
Pi+_PNA+	45	299	15.050167224080269	H20	20	H	W0002091	2.873342832077857	3.0030928990422483	360	Compound
Pi-_PNA+	2	299	0.6688963210702341	H20	20	H	W0002091	2.873342832077857	3.0030928990422483	360	Compound
Pi-_PNA-	194	299	64.88294314381271	H20	20	H	W0002091	2.873342832077857	3.0030928990422483	360	Compound
Pi+_PNA-	85	480	17.708333333333336	H21	21	H	W0002091	2.873342832077857	3.0030928990422483	360	Compound
Pi+_PNA+	60	480	12.5	H21	21	H	W0002091	2.873342832077857	3.0030928990422483	360	Compound
Pi-_PNA+	0	480	0	H21	21	H	W0002091	2.873342832077857	3.0030928990422483	360	Compound
Pi-_PNA-	335	480	69.79166666666666	H21	21	H	W0002091	2.873342832077857	3.0030928990422483	360	Compound
Pi+_PNA-	82	459	17.86492374727669	H22	22	H	W0002091	2.873342832077857	3.0030928990422483	360	Compound
Pi+_PNA+	63	459	13.725490196078432	H22	22	H	W0002091	2.873342832077857	3.0030928990422483	360	Compound
Pi-_PNA+	4	459	0.8714596949891068	H22	22	H	W0002091	2.873342832077857	3.0030928990422483	360	Compound
Pi-_PNA-	310	459	67.53812636165577	H22	22	H	W0002091	2.873342832077857	3.0030928990422483	360	Compound
Pi+_PNA-	87	461	18.872017353579178	H23	23	H	W0002091	2.873342832077857	3.0030928990422483	360	Negative Control
Pi+_PNA+	78	461	16.919739696312362	H23	23	H	W0002091	2.873342832077857	3.0030928990422483	360	Negative Control
Pi-_PNA+	4	461	0.8676789587852495	H23	23	H	W0002091	2.873342832077857	3.0030928990422483	360	Negative Control
Pi-_PNA-	292	461	63.34056399132321	H23	23	H	W0002091	2.873342832077857	3.0030928990422483	360	Negative Control
Pi+_PNA-	108	478	22.594142259414227	H24	24	H	W0002091	2.873342832077857	3.0030928990422483	360	Positive Control
Pi+_PNA+	35	478	7.322175732217573	H24	24	H	W0002091	2.873342832077857	3.0030928990422483	360	Positive Control
Pi-_PNA+	4	478	0.8368200836820083	H24	24	H	W0002091	2.873342832077857	3.0030928990422483	360	Positive Control
Pi-_PNA-	331	478	69.24686192468619	H24	24	H	W0002091	2.873342832077857	3.0030928990422483	360	Positive Control
Pi+_PNA-	94	572	16.433566433566433	I01	01	I	W0002091	2.873342832077857	3.0030928990422483	360	Compound
Pi+_PNA+	102	572	17.832167832167833	I01	01	I	W0002091	2.873342832077857	3.0030928990422483	360	Compound
Pi-_PNA+	2	572	0.34965034965034963	I01	01	I	W0002091	2.873342832077857	3.0030928990422483	360	Compound
Pi-_PNA-	374	572	65.38461538461539	I01	01	I	W0002091	2.873342832077857	3.0030928990422483	360	Compound
Pi+_PNA-	71	558	12.724014336917563	I02	02	I	W0002091	2.873342832077857	3.0030928990422483	360	Compound
Pi+_PNA+	109	558	19.53405017921147	I02	02	I	W0002091	2.873342832077857	3.0030928990422483	360	Compound
Pi-_PNA+	0	558	0	I02	02	I	W0002091	2.873342832077857	3.0030928990422483	360	Compound
Pi-_PNA-	378	558	67.74193548387096	I02	02	I	W0002091	2.873342832077857	3.0030928990422483	360	Compound
Pi+_PNA-	65	560	11.607142857142858	I03	03	I	W0002091	2.873342832077857	3.0030928990422483	360	Compound
Pi+_PNA+	103	560	18.392857142857146	I03	03	I	W0002091	2.873342832077857	3.0030928990422483	360	Compound
Pi-_PNA+	3	560	0.5357142857142857	I03	03	I	W0002091	2.873342832077857	3.0030928990422483	360	Compound
Pi-_PNA-	389	560	69.46428571428571	I03	03	I	W0002091	2.873342832077857	3.0030928990422483	360	Compound
Pi+_PNA-	51	557	9.156193895870736	I04	04	I	W0002091	2.873342832077857	3.0030928990422483	360	Compound
Pi+_PNA+	108	557	19.389587073608617	I04	04	I	W0002091	2.873342832077857	3.0030928990422483	360	Compound
Pi-_PNA+	4	557	0.718132854578097	I04	04	I	W0002091	2.873342832077857	3.0030928990422483	360	Compound
Pi-_PNA-	394	557	70.73608617594255	I04	04	I	W0002091	2.873342832077857	3.0030928990422483	360	Compound
Pi+_PNA-	54	355	15.211267605633802	I05	05	I	W0002091	2.873342832077857	3.0030928990422483	360	Compound
Pi+_PNA+	85	355	23.943661971830984	I05	05	I	W0002091	2.873342832077857	3.0030928990422483	360	Compound
Pi-_PNA+	4	355	1.1267605633802817	I05	05	I	W0002091	2.873342832077857	3.0030928990422483	360	Compound
Pi-_PNA-	212	355	59.71830985915493	I05	05	I	W0002091	2.873342832077857	3.0030928990422483	360	Compound
Pi+_PNA-	58	499	11.623246492985972	I06	06	I	W0002091	2.873342832077857	3.0030928990422483	360	Compound
Pi+_PNA+	82	499	16.432865731462925	I06	06	I	W0002091	2.873342832077857	3.0030928990422483	360	Compound
Pi-_PNA+	6	499	1.2024048096192386	I06	06	I	W0002091	2.873342832077857	3.0030928990422483	360	Compound
Pi-_PNA-	353	499	70.74148296593187	I06	06	I	W0002091	2.873342832077857	3.0030928990422483	360	Compound
Pi+_PNA-	62	377	16.445623342175068	I07	07	I	W0002091	2.873342832077857	3.0030928990422483	360	Compound
Pi+_PNA+	76	377	20.159151193633953	I07	07	I	W0002091	2.873342832077857	3.0030928990422483	360	Compound
Pi-_PNA+	2	377	0.5305039787798408	I07	07	I	W0002091	2.873342832077857	3.0030928990422483	360	Compound
Pi-_PNA-	237	377	62.864721485411145	I07	07	I	W0002091	2.873342832077857	3.0030928990422483	360	Compound
Pi+_PNA-	83	407	20.39312039312039	I08	08	I	W0002091	2.873342832077857	3.0030928990422483	360	Compound
Pi+_PNA+	73	407	17.936117936117938	I08	08	I	W0002091	2.873342832077857	3.0030928990422483	360	Compound
Pi-_PNA+	1	407	0.2457002457002457	I08	08	I	W0002091	2.873342832077857	3.0030928990422483	360	Compound
Pi-_PNA-	250	407	61.42506142506142	I08	08	I	W0002091	2.873342832077857	3.0030928990422483	360	Compound
Pi+_PNA-	66	444	14.864864864864865	I09	09	I	W0002091	2.873342832077857	3.0030928990422483	360	Compound
Pi+_PNA+	67	444	15.090090090090092	I09	09	I	W0002091	2.873342832077857	3.0030928990422483	360	Compound
Pi-_PNA+	3	444	0.6756756756756757	I09	09	I	W0002091	2.873342832077857	3.0030928990422483	360	Compound
Pi-_PNA-	308	444	69.36936936936937	I09	09	I	W0002091	2.873342832077857	3.0030928990422483	360	Compound
Pi+_PNA-	69	499	13.827655310621243	I10	10	I	W0002091	2.873342832077857	3.0030928990422483	360	Compound
Pi+_PNA+	83	499	16.63326653306613	I10	10	I	W0002091	2.873342832077857	3.0030928990422483	360	Compound
Pi-_PNA+	3	499	0.6012024048096193	I10	10	I	W0002091	2.873342832077857	3.0030928990422483	360	Compound
Pi-_PNA-	344	499	68.93787575150301	I10	10	I	W0002091	2.873342832077857	3.0030928990422483	360	Compound
Pi+_PNA-	72	468	15.384615384615385	I11	11	I	W0002091	2.873342832077857	3.0030928990422483	360	Compound
Pi+_PNA+	110	468	23.504273504273502	I11	11	I	W0002091	2.873342832077857	3.0030928990422483	360	Compound
Pi-_PNA+	3	468	0.641025641025641	I11	11	I	W0002091	2.873342832077857	3.0030928990422483	360	Compound
Pi-_PNA-	283	468	60.470085470085465	I11	11	I	W0002091	2.873342832077857	3.0030928990422483	360	Compound
Pi+_PNA-	57	383	14.882506527415144	I12	12	I	W0002091	2.873342832077857	3.0030928990422483	360	Compound
Pi+_PNA+	60	383	15.66579634464752	I12	12	I	W0002091	2.873342832077857	3.0030928990422483	360	Compound
Pi-_PNA+	4	383	1.0443864229765014	I12	12	I	W0002091	2.873342832077857	3.0030928990422483	360	Compound
Pi-_PNA-	262	383	68.40731070496084	I12	12	I	W0002091	2.873342832077857	3.0030928990422483	360	Compound
Pi+_PNA-	60	473	12.684989429175475	I13	13	I	W0002091	2.873342832077857	3.0030928990422483	360	Compound
Pi+_PNA+	93	473	19.661733615221987	I13	13	I	W0002091	2.873342832077857	3.0030928990422483	360	Compound
Pi-_PNA+	5	473	1.0570824524312896	I13	13	I	W0002091	2.873342832077857	3.0030928990422483	360	Compound
Pi-_PNA-	315	473	66.59619450317125	I13	13	I	W0002091	2.873342832077857	3.0030928990422483	360	Compound
Pi+_PNA-	61	502	12.151394422310757	I14	14	I	W0002091	2.873342832077857	3.0030928990422483	360	Compound
Pi+_PNA+	80	502	15.936254980079681	I14	14	I	W0002091	2.873342832077857	3.0030928990422483	360	Compound
Pi-_PNA+	7	502	1.394422310756972	I14	14	I	W0002091	2.873342832077857	3.0030928990422483	360	Compound
Pi-_PNA-	354	502	70.5179282868526	I14	14	I	W0002091	2.873342832077857	3.0030928990422483	360	Compound
Pi+_PNA-	48	349	13.753581661891118	I15	15	I	W0002091	2.873342832077857	3.0030928990422483	360	Compound
Pi+_PNA+	75	349	21.48997134670487	I15	15	I	W0002091	2.873342832077857	3.0030928990422483	360	Compound
Pi-_PNA+	2	349	0.5730659025787965	I15	15	I	W0002091	2.873342832077857	3.0030928990422483	360	Compound
Pi-_PNA-	224	349	64.18338108882521	I15	15	I	W0002091	2.873342832077857	3.0030928990422483	360	Compound
Pi+_PNA-	63	462	13.636363636363635	I16	16	I	W0002091	2.873342832077857	3.0030928990422483	360	Compound
Pi+_PNA+	70	462	15.151515151515152	I16	16	I	W0002091	2.873342832077857	3.0030928990422483	360	Compound
Pi-_PNA+	5	462	1.0822510822510822	I16	16	I	W0002091	2.873342832077857	3.0030928990422483	360	Compound
Pi-_PNA-	324	462	70.12987012987013	I16	16	I	W0002091	2.873342832077857	3.0030928990422483	360	Compound
Pi+_PNA-	39	444	8.783783783783784	I17	17	I	W0002091	2.873342832077857	3.0030928990422483	360	Compound
Pi+_PNA+	54	444	12.162162162162163	I17	17	I	W0002091	2.873342832077857	3.0030928990422483	360	Compound
Pi-_PNA+	3	444	0.6756756756756757	I17	17	I	W0002091	2.873342832077857	3.0030928990422483	360	Compound
Pi-_PNA-	348	444	78.37837837837837	I17	17	I	W0002091	2.873342832077857	3.0030928990422483	360	Compound
Pi+_PNA-	39	367	10.626702997275205	I18	18	I	W0002091	2.873342832077857	3.0030928990422483	360	Compound
Pi+_PNA+	69	367	18.80108991825613	I18	18	I	W0002091	2.873342832077857	3.0030928990422483	360	Compound
Pi-_PNA+	4	367	1.08991825613079	I18	18	I	W0002091	2.873342832077857	3.0030928990422483	360	Compound
Pi-_PNA-	255	367	69.48228882833789	I18	18	I	W0002091	2.873342832077857	3.0030928990422483	360	Compound
Pi+_PNA-	61	490	12.448979591836734	I19	19	I	W0002091	2.873342832077857	3.0030928990422483	360	Compound
Pi+_PNA+	72	490	14.69387755102041	I19	19	I	W0002091	2.873342832077857	3.0030928990422483	360	Compound
Pi-_PNA+	2	490	0.40816326530612246	I19	19	I	W0002091	2.873342832077857	3.0030928990422483	360	Compound
Pi-_PNA-	355	490	72.44897959183673	I19	19	I	W0002091	2.873342832077857	3.0030928990422483	360	Compound
Pi+_PNA-	67	407	16.461916461916463	I20	20	I	W0002091	2.873342832077857	3.0030928990422483	360	Compound
Pi+_PNA+	96	407	23.587223587223587	I20	20	I	W0002091	2.873342832077857	3.0030928990422483	360	Compound
Pi-_PNA+	6	407	1.4742014742014742	I20	20	I	W0002091	2.873342832077857	3.0030928990422483	360	Compound
Pi-_PNA-	238	407	58.47665847665847	I20	20	I	W0002091	2.873342832077857	3.0030928990422483	360	Compound
Pi+_PNA-	58	422	13.744075829383887	I21	21	I	W0002091	2.873342832077857	3.0030928990422483	360	Compound
Pi+_PNA+	60	422	14.218009478672986	I21	21	I	W0002091	2.873342832077857	3.0030928990422483	360	Compound
Pi-_PNA+	2	422	0.47393364928909953	I21	21	I	W0002091	2.873342832077857	3.0030928990422483	360	Compound
Pi-_PNA-	302	422	71.56398104265402	I21	21	I	W0002091	2.873342832077857	3.0030928990422483	360	Compound
Pi+_PNA-	63	554	11.371841155234657	I22	22	I	W0002091	2.873342832077857	3.0030928990422483	360	Compound
Pi+_PNA+	118	554	21.299638989169676	I22	22	I	W0002091	2.873342832077857	3.0030928990422483	360	Compound
Pi-_PNA+	11	554	1.9855595667870036	I22	22	I	W0002091	2.873342832077857	3.0030928990422483	360	Compound
Pi-_PNA-	362	554	65.34296028880865	I22	22	I	W0002091	2.873342832077857	3.0030928990422483	360	Compound
Pi+_PNA-	118	573	20.593368237347295	I23	23	I	W0002091	2.873342832077857	3.0030928990422483	360	Positive Control
Pi+_PNA+	62	573	10.820244328097731	I23	23	I	W0002091	2.873342832077857	3.0030928990422483	360	Positive Control
Pi-_PNA+	6	573	1.0471204188481675	I23	23	I	W0002091	2.873342832077857	3.0030928990422483	360	Positive Control
Pi-_PNA-	387	573	67.5392670157068	I23	23	I	W0002091	2.873342832077857	3.0030928990422483	360	Positive Control
Pi+_PNA-	55	515	10.679611650485436	I24	24	I	W0002091	2.873342832077857	3.0030928990422483	360	Negative Control
Pi+_PNA+	89	515	17.281553398058254	I24	24	I	W0002091	2.873342832077857	3.0030928990422483	360	Negative Control
Pi-_PNA+	9	515	1.7475728155339807	I24	24	I	W0002091	2.873342832077857	3.0030928990422483	360	Negative Control
Pi-_PNA-	362	515	70.29126213592232	I24	24	I	W0002091	2.873342832077857	3.0030928990422483	360	Negative Control
Pi+_PNA-	48	481	9.97920997920998	J01	01	J	W0002091	2.873342832077857	3.0030928990422483	360	Compound
Pi+_PNA+	90	481	18.711018711018713	J01	01	J	W0002091	2.873342832077857	3.0030928990422483	360	Compound
Pi-_PNA+	1	481	0.2079002079002079	J01	01	J	W0002091	2.873342832077857	3.0030928990422483	360	Compound
Pi-_PNA-	342	481	71.10187110187111	J01	01	J	W0002091	2.873342832077857	3.0030928990422483	360	Compound
Pi+_PNA-	95	474	20.042194092827003	J02	02	J	W0002091	2.873342832077857	3.0030928990422483	360	Compound
Pi+_PNA+	76	474	16.033755274261605	J02	02	J	W0002091	2.873342832077857	3.0030928990422483	360	Compound
Pi-_PNA+	1	474	0.21097046413502107	J02	02	J	W0002091	2.873342832077857	3.0030928990422483	360	Compound
Pi-_PNA-	302	474	63.71308016877637	J02	02	J	W0002091	2.873342832077857	3.0030928990422483	360	Compound
Pi+_PNA-	50	512	9.765625	J03	03	J	W0002091	2.873342832077857	3.0030928990422483	360	Compound
Pi+_PNA+	59	512	11.5234375	J03	03	J	W0002091	2.873342832077857	3.0030928990422483	360	Compound
Pi-_PNA+	1	512	0.1953125	J03	03	J	W0002091	2.873342832077857	3.0030928990422483	360	Compound
Pi-_PNA-	402	512	78.515625	J03	03	J	W0002091	2.873342832077857	3.0030928990422483	360	Compound
Pi+_PNA-	97	685	14.16058394160584	J04	04	J	W0002091	2.873342832077857	3.0030928990422483	360	Compound
Pi+_PNA+	154	685	22.48175182481752	J04	04	J	W0002091	2.873342832077857	3.0030928990422483	360	Compound
Pi-_PNA+	4	685	0.583941605839416	J04	04	J	W0002091	2.873342832077857	3.0030928990422483	360	Compound
Pi-_PNA-	430	685	62.77372262773723	J04	04	J	W0002091	2.873342832077857	3.0030928990422483	360	Compound
Pi+_PNA-	85	563	15.097690941385435	J05	05	J	W0002091	2.873342832077857	3.0030928990422483	360	Compound
Pi+_PNA+	133	563	23.623445825932503	J05	05	J	W0002091	2.873342832077857	3.0030928990422483	360	Compound
Pi-_PNA+	3	563	0.5328596802841918	J05	05	J	W0002091	2.873342832077857	3.0030928990422483	360	Compound
Pi-_PNA-	342	563	60.746003552397866	J05	05	J	W0002091	2.873342832077857	3.0030928990422483	360	Compound
Pi+_PNA-	37	440	8.409090909090908	J06	06	J	W0002091	2.873342832077857	3.0030928990422483	360	Compound
Pi+_PNA+	68	440	15.454545454545453	J06	06	J	W0002091	2.873342832077857	3.0030928990422483	360	Compound
Pi-_PNA+	3	440	0.6818181818181818	J06	06	J	W0002091	2.873342832077857	3.0030928990422483	360	Compound
Pi-_PNA-	332	440	75.45454545454545	J06	06	J	W0002091	2.873342832077857	3.0030928990422483	360	Compound
Pi+_PNA-	54	390	13.846153846153847	J07	07	J	W0002091	2.873342832077857	3.0030928990422483	360	Compound
Pi+_PNA+	65	390	16.666666666666664	J07	07	J	W0002091	2.873342832077857	3.0030928990422483	360	Compound
Pi-_PNA+	4	390	1.0256410256410255	J07	07	J	W0002091	2.873342832077857	3.0030928990422483	360	Compound
Pi-_PNA-	267	390	68.46153846153847	J07	07	J	W0002091	2.873342832077857	3.0030928990422483	360	Compound
Pi+_PNA-	52	418	12.440191387559809	J08	08	J	W0002091	2.873342832077857	3.0030928990422483	360	Compound
Pi+_PNA+	76	418	18.181818181818183	J08	08	J	W0002091	2.873342832077857	3.0030928990422483	360	Compound
Pi-_PNA+	2	418	0.4784688995215311	J08	08	J	W0002091	2.873342832077857	3.0030928990422483	360	Compound
Pi-_PNA-	288	418	68.89952153110048	J08	08	J	W0002091	2.873342832077857	3.0030928990422483	360	Compound
Pi+_PNA-	61	543	11.233885819521179	J09	09	J	W0002091	2.873342832077857	3.0030928990422483	360	Compound
Pi+_PNA+	162	543	29.83425414364641	J09	09	J	W0002091	2.873342832077857	3.0030928990422483	360	Compound
Pi-_PNA+	8	543	1.4732965009208103	J09	09	J	W0002091	2.873342832077857	3.0030928990422483	360	Compound
Pi-_PNA-	312	543	57.4585635359116	J09	09	J	W0002091	2.873342832077857	3.0030928990422483	360	Compound
Pi+_PNA-	64	366	17.48633879781421	J10	10	J	W0002091	2.873342832077857	3.0030928990422483	360	Compound
Pi+_PNA+	52	366	14.207650273224044	J10	10	J	W0002091	2.873342832077857	3.0030928990422483	360	Compound
Pi-_PNA+	0	366	0	J10	10	J	W0002091	2.873342832077857	3.0030928990422483	360	Compound
Pi-_PNA-	250	366	68.30601092896174	J10	10	J	W0002091	2.873342832077857	3.0030928990422483	360	Compound
Pi+_PNA-	68	447	15.212527964205815	J11	11	J	W0002091	2.873342832077857	3.0030928990422483	360	Compound
Pi+_PNA+	67	447	14.988814317673377	J11	11	J	W0002091	2.873342832077857	3.0030928990422483	360	Compound
Pi-_PNA+	6	447	1.342281879194631	J11	11	J	W0002091	2.873342832077857	3.0030928990422483	360	Compound
Pi-_PNA-	306	447	68.45637583892618	J11	11	J	W0002091	2.873342832077857	3.0030928990422483	360	Compound
Pi+_PNA-	47	388	12.11340206185567	J12	12	J	W0002091	2.873342832077857	3.0030928990422483	360	Compound
Pi+_PNA+	82	388	21.1340206185567	J12	12	J	W0002091	2.873342832077857	3.0030928990422483	360	Compound
Pi-_PNA+	6	388	1.5463917525773196	J12	12	J	W0002091	2.873342832077857	3.0030928990422483	360	Compound
Pi-_PNA-	253	388	65.20618556701031	J12	12	J	W0002091	2.873342832077857	3.0030928990422483	360	Compound
Pi+_PNA-	60	434	13.82488479262673	J13	13	J	W0002091	2.873342832077857	3.0030928990422483	360	Compound
Pi+_PNA+	42	434	9.67741935483871	J13	13	J	W0002091	2.873342832077857	3.0030928990422483	360	Compound
Pi-_PNA+	2	434	0.4608294930875576	J13	13	J	W0002091	2.873342832077857	3.0030928990422483	360	Compound
Pi-_PNA-	330	434	76.036866359447	J13	13	J	W0002091	2.873342832077857	3.0030928990422483	360	Compound
Pi+_PNA-	64	527	12.144212523719165	J14	14	J	W0002091	2.873342832077857	3.0030928990422483	360	Compound
Pi+_PNA+	95	527	18.026565464895636	J14	14	J	W0002091	2.873342832077857	3.0030928990422483	360	Compound
Pi-_PNA+	4	527	0.7590132827324478	J14	14	J	W0002091	2.873342832077857	3.0030928990422483	360	Compound
Pi-_PNA-	364	527	69.07020872865274	J14	14	J	W0002091	2.873342832077857	3.0030928990422483	360	Compound
Pi+_PNA-	66	420	15.714285714285714	J15	15	J	W0002091	2.873342832077857	3.0030928990422483	360	Compound
Pi+_PNA+	89	420	21.19047619047619	J15	15	J	W0002091	2.873342832077857	3.0030928990422483	360	Compound
Pi-_PNA+	4	420	0.9523809523809524	J15	15	J	W0002091	2.873342832077857	3.0030928990422483	360	Compound
Pi-_PNA-	261	420	62.142857142857146	J15	15	J	W0002091	2.873342832077857	3.0030928990422483	360	Compound
Pi+_PNA-	66	428	15.42056074766355	J16	16	J	W0002091	2.873342832077857	3.0030928990422483	360	Compound
Pi+_PNA+	85	428	19.859813084112147	J16	16	J	W0002091	2.873342832077857	3.0030928990422483	360	Compound
Pi-_PNA+	4	428	0.9345794392523363	J16	16	J	W0002091	2.873342832077857	3.0030928990422483	360	Compound
Pi-_PNA-	273	428	63.78504672897196	J16	16	J	W0002091	2.873342832077857	3.0030928990422483	360	Compound
Pi+_PNA-	83	540	15.37037037037037	J17	17	J	W0002091	2.873342832077857	3.0030928990422483	360	Compound
Pi+_PNA+	96	540	17.77777777777778	J17	17	J	W0002091	2.873342832077857	3.0030928990422483	360	Compound
Pi-_PNA+	5	540	0.9259259259259258	J17	17	J	W0002091	2.873342832077857	3.0030928990422483	360	Compound
Pi-_PNA-	356	540	65.92592592592592	J17	17	J	W0002091	2.873342832077857	3.0030928990422483	360	Compound
Pi+_PNA-	52	418	12.440191387559809	J18	18	J	W0002091	2.873342832077857	3.0030928990422483	360	Compound
Pi+_PNA+	70	418	16.74641148325359	J18	18	J	W0002091	2.873342832077857	3.0030928990422483	360	Compound
Pi-_PNA+	5	418	1.1961722488038278	J18	18	J	W0002091	2.873342832077857	3.0030928990422483	360	Compound
Pi-_PNA-	291	418	69.61722488038278	J18	18	J	W0002091	2.873342832077857	3.0030928990422483	360	Compound
Pi+_PNA-	54	425	12.705882352941176	J19	19	J	W0002091	2.873342832077857	3.0030928990422483	360	Compound
Pi+_PNA+	57	425	13.411764705882353	J19	19	J	W0002091	2.873342832077857	3.0030928990422483	360	Compound
Pi-_PNA+	6	425	1.411764705882353	J19	19	J	W0002091	2.873342832077857	3.0030928990422483	360	Compound
Pi-_PNA-	308	425	72.47058823529412	J19	19	J	W0002091	2.873342832077857	3.0030928990422483	360	Compound
Pi+_PNA-	66	604	10.927152317880795	J20	20	J	W0002091	2.873342832077857	3.0030928990422483	360	Compound
Pi+_PNA+	135	604	22.350993377483444	J20	20	J	W0002091	2.873342832077857	3.0030928990422483	360	Compound
Pi-_PNA+	3	604	0.49668874172185434	J20	20	J	W0002091	2.873342832077857	3.0030928990422483	360	Compound
Pi-_PNA-	400	604	66.22516556291392	J20	20	J	W0002091	2.873342832077857	3.0030928990422483	360	Compound
Pi+_PNA-	68	497	13.682092555331993	J21	21	J	W0002091	2.873342832077857	3.0030928990422483	360	Compound
Pi+_PNA+	109	497	21.93158953722334	J21	21	J	W0002091	2.873342832077857	3.0030928990422483	360	Compound
Pi-_PNA+	4	497	0.8048289738430584	J21	21	J	W0002091	2.873342832077857	3.0030928990422483	360	Compound
Pi-_PNA-	316	497	63.581488933601605	J21	21	J	W0002091	2.873342832077857	3.0030928990422483	360	Compound
Pi+_PNA-	73	450	16.22222222222222	J22	22	J	W0002091	2.873342832077857	3.0030928990422483	360	Compound
Pi+_PNA+	107	450	23.77777777777778	J22	22	J	W0002091	2.873342832077857	3.0030928990422483	360	Compound
Pi-_PNA+	3	450	0.6666666666666667	J22	22	J	W0002091	2.873342832077857	3.0030928990422483	360	Compound
Pi-_PNA-	267	450	59.333333333333336	J22	22	J	W0002091	2.873342832077857	3.0030928990422483	360	Compound
Pi+_PNA-	80	488	16.39344262295082	J23	23	J	W0002091	2.873342832077857	3.0030928990422483	360	Positive Control
Pi+_PNA+	68	488	13.934426229508196	J23	23	J	W0002091	2.873342832077857	3.0030928990422483	360	Positive Control
Pi-_PNA+	10	488	2.0491803278688523	J23	23	J	W0002091	2.873342832077857	3.0030928990422483	360	Positive Control
Pi-_PNA-	330	488	67.62295081967213	J23	23	J	W0002091	2.873342832077857	3.0030928990422483	360	Positive Control
Pi+_PNA-	65	447	14.541387024608502	J24	24	J	W0002091	2.873342832077857	3.0030928990422483	360	Negative Control
Pi+_PNA+	103	447	23.042505592841163	J24	24	J	W0002091	2.873342832077857	3.0030928990422483	360	Negative Control
Pi-_PNA+	4	447	0.8948545861297539	J24	24	J	W0002091	2.873342832077857	3.0030928990422483	360	Negative Control
Pi-_PNA-	275	447	61.521252796420576	J24	24	J	W0002091	2.873342832077857	3.0030928990422483	360	Negative Control
Pi+_PNA-	78	713	10.93969144460028	K01	01	K	W0002091	2.873342832077857	3.0030928990422483	360	Compound
Pi+_PNA+	119	713	16.690042075736326	K01	01	K	W0002091	2.873342832077857	3.0030928990422483	360	Compound
Pi-_PNA+	3	713	0.42075736325385693	K01	01	K	W0002091	2.873342832077857	3.0030928990422483	360	Compound
Pi-_PNA-	513	713	71.94950911640954	K01	01	K	W0002091	2.873342832077857	3.0030928990422483	360	Compound
Pi+_PNA-	70	525	13.333333333333334	K02	02	K	W0002091	2.873342832077857	3.0030928990422483	360	Compound
Pi+_PNA+	94	525	17.904761904761905	K02	02	K	W0002091	2.873342832077857	3.0030928990422483	360	Compound
Pi-_PNA+	4	525	0.7619047619047619	K02	02	K	W0002091	2.873342832077857	3.0030928990422483	360	Compound
Pi-_PNA-	357	525	68	K02	02	K	W0002091	2.873342832077857	3.0030928990422483	360	Compound
Pi+_PNA-	95	592	16.0472972972973	K03	03	K	W0002091	2.873342832077857	3.0030928990422483	360	Compound
Pi+_PNA+	91	592	15.371621621621623	K03	03	K	W0002091	2.873342832077857	3.0030928990422483	360	Compound
Pi-_PNA+	4	592	0.6756756756756757	K03	03	K	W0002091	2.873342832077857	3.0030928990422483	360	Compound
Pi-_PNA-	402	592	67.9054054054054	K03	03	K	W0002091	2.873342832077857	3.0030928990422483	360	Compound
Pi+_PNA-	90	498	18.072289156626507	K04	04	K	W0002091	2.873342832077857	3.0030928990422483	360	Compound
Pi+_PNA+	84	498	16.867469879518072	K04	04	K	W0002091	2.873342832077857	3.0030928990422483	360	Compound
Pi-_PNA+	3	498	0.6024096385542169	K04	04	K	W0002091	2.873342832077857	3.0030928990422483	360	Compound
Pi-_PNA-	321	498	64.45783132530121	K04	04	K	W0002091	2.873342832077857	3.0030928990422483	360	Compound
Pi+_PNA-	80	489	16.359918200409	K05	05	K	W0002091	2.873342832077857	3.0030928990422483	360	Compound
Pi+_PNA+	66	489	13.496932515337424	K05	05	K	W0002091	2.873342832077857	3.0030928990422483	360	Compound
Pi-_PNA+	2	489	0.408997955010225	K05	05	K	W0002091	2.873342832077857	3.0030928990422483	360	Compound
Pi-_PNA-	341	489	69.73415132924336	K05	05	K	W0002091	2.873342832077857	3.0030928990422483	360	Compound
Pi+_PNA-	68	536	12.686567164179104	K06	06	K	W0002091	2.873342832077857	3.0030928990422483	360	Compound
Pi+_PNA+	67	536	12.5	K06	06	K	W0002091	2.873342832077857	3.0030928990422483	360	Compound
Pi-_PNA+	6	536	1.1194029850746268	K06	06	K	W0002091	2.873342832077857	3.0030928990422483	360	Compound
Pi-_PNA-	395	536	73.69402985074626	K06	06	K	W0002091	2.873342832077857	3.0030928990422483	360	Compound
Pi+_PNA-	80	482	16.59751037344398	K07	07	K	W0002091	2.873342832077857	3.0030928990422483	360	Compound
Pi+_PNA+	78	482	16.182572614107883	K07	07	K	W0002091	2.873342832077857	3.0030928990422483	360	Compound
Pi-_PNA+	6	482	1.2448132780082988	K07	07	K	W0002091	2.873342832077857	3.0030928990422483	360	Compound
Pi-_PNA-	318	482	65.97510373443983	K07	07	K	W0002091	2.873342832077857	3.0030928990422483	360	Compound
Pi+_PNA-	58	454	12.77533039647577	K08	08	K	W0002091	2.873342832077857	3.0030928990422483	360	Compound
Pi+_PNA+	65	454	14.317180616740089	K08	08	K	W0002091	2.873342832077857	3.0030928990422483	360	Compound
Pi-_PNA+	1	454	0.22026431718061676	K08	08	K	W0002091	2.873342832077857	3.0030928990422483	360	Compound
Pi-_PNA-	330	454	72.68722466960352	K08	08	K	W0002091	2.873342832077857	3.0030928990422483	360	Compound
Pi+_PNA-	73	452	16.150442477876105	K09	09	K	W0002091	2.873342832077857	3.0030928990422483	360	Compound
Pi+_PNA+	49	452	10.84070796460177	K09	09	K	W0002091	2.873342832077857	3.0030928990422483	360	Compound
Pi-_PNA+	3	452	0.6637168141592921	K09	09	K	W0002091	2.873342832077857	3.0030928990422483	360	Compound
Pi-_PNA-	327	452	72.34513274336283	K09	09	K	W0002091	2.873342832077857	3.0030928990422483	360	Compound
Pi+_PNA-	76	484	15.702479338842975	K10	10	K	W0002091	2.873342832077857	3.0030928990422483	360	Compound
Pi+_PNA+	85	484	17.56198347107438	K10	10	K	W0002091	2.873342832077857	3.0030928990422483	360	Compound
Pi-_PNA+	3	484	0.6198347107438017	K10	10	K	W0002091	2.873342832077857	3.0030928990422483	360	Compound
Pi-_PNA-	320	484	66.11570247933885	K10	10	K	W0002091	2.873342832077857	3.0030928990422483	360	Compound
Pi+_PNA-	58	489	11.860940695296524	K11	11	K	W0002091	2.873342832077857	3.0030928990422483	360	Compound
Pi+_PNA+	72	489	14.723926380368098	K11	11	K	W0002091	2.873342832077857	3.0030928990422483	360	Compound
Pi-_PNA+	2	489	0.408997955010225	K11	11	K	W0002091	2.873342832077857	3.0030928990422483	360	Compound
Pi-_PNA-	357	489	73.00613496932516	K11	11	K	W0002091	2.873342832077857	3.0030928990422483	360	Compound
Pi+_PNA-	48	452	10.619469026548673	K12	12	K	W0002091	2.873342832077857	3.0030928990422483	360	Compound
Pi+_PNA+	79	452	17.47787610619469	K12	12	K	W0002091	2.873342832077857	3.0030928990422483	360	Compound
Pi-_PNA+	3	452	0.6637168141592921	K12	12	K	W0002091	2.873342832077857	3.0030928990422483	360	Compound
Pi-_PNA-	322	452	71.23893805309734	K12	12	K	W0002091	2.873342832077857	3.0030928990422483	360	Compound
Pi+_PNA-	50	451	11.086474501108649	K13	13	K	W0002091	2.873342832077857	3.0030928990422483	360	Compound
Pi+_PNA+	67	451	14.855875831485587	K13	13	K	W0002091	2.873342832077857	3.0030928990422483	360	Compound
Pi-_PNA+	11	451	2.4390243902439024	K13	13	K	W0002091	2.873342832077857	3.0030928990422483	360	Compound
Pi-_PNA-	323	451	71.61862527716187	K13	13	K	W0002091	2.873342832077857	3.0030928990422483	360	Compound
Pi+_PNA-	65	493	13.184584178498987	K14	14	K	W0002091	2.873342832077857	3.0030928990422483	360	Compound
Pi+_PNA+	107	493	21.703853955375255	K14	14	K	W0002091	2.873342832077857	3.0030928990422483	360	Compound
Pi-_PNA+	1	493	0.2028397565922921	K14	14	K	W0002091	2.873342832077857	3.0030928990422483	360	Compound
Pi-_PNA-	320	493	64.90872210953347	K14	14	K	W0002091	2.873342832077857	3.0030928990422483	360	Compound
Pi+_PNA-	70	505	13.861386138613863	K15	15	K	W0002091	2.873342832077857	3.0030928990422483	360	Compound
Pi+_PNA+	72	505	14.257425742574256	K15	15	K	W0002091	2.873342832077857	3.0030928990422483	360	Compound
Pi-_PNA+	2	505	0.39603960396039606	K15	15	K	W0002091	2.873342832077857	3.0030928990422483	360	Compound
Pi-_PNA-	361	505	71.48514851485149	K15	15	K	W0002091	2.873342832077857	3.0030928990422483	360	Compound
Pi+_PNA-	51	517	9.864603481624759	K16	16	K	W0002091	2.873342832077857	3.0030928990422483	360	Compound
Pi+_PNA+	109	517	21.08317214700193	K16	16	K	W0002091	2.873342832077857	3.0030928990422483	360	Compound
Pi-_PNA+	5	517	0.9671179883945842	K16	16	K	W0002091	2.873342832077857	3.0030928990422483	360	Compound
Pi-_PNA-	352	517	68.08510638297872	K16	16	K	W0002091	2.873342832077857	3.0030928990422483	360	Compound
Pi+_PNA-	62	626	9.904153354632587	K17	17	K	W0002091	2.873342832077857	3.0030928990422483	360	Compound
Pi+_PNA+	85	626	13.578274760383385	K17	17	K	W0002091	2.873342832077857	3.0030928990422483	360	Compound
Pi-_PNA+	5	626	0.7987220447284344	K17	17	K	W0002091	2.873342832077857	3.0030928990422483	360	Compound
Pi-_PNA-	474	626	75.71884984025559	K17	17	K	W0002091	2.873342832077857	3.0030928990422483	360	Compound
Pi+_PNA-	56	390	14.358974358974358	K18	18	K	W0002091	2.873342832077857	3.0030928990422483	360	Compound
Pi+_PNA+	86	390	22.05128205128205	K18	18	K	W0002091	2.873342832077857	3.0030928990422483	360	Compound
Pi-_PNA+	5	390	1.282051282051282	K18	18	K	W0002091	2.873342832077857	3.0030928990422483	360	Compound
Pi-_PNA-	243	390	62.30769230769231	K18	18	K	W0002091	2.873342832077857	3.0030928990422483	360	Compound
Pi+_PNA-	65	505	12.871287128712872	K19	19	K	W0002091	2.873342832077857	3.0030928990422483	360	Compound
Pi+_PNA+	102	505	20.198019801980198	K19	19	K	W0002091	2.873342832077857	3.0030928990422483	360	Compound
Pi-_PNA+	5	505	0.9900990099009901	K19	19	K	W0002091	2.873342832077857	3.0030928990422483	360	Compound
Pi-_PNA-	333	505	65.94059405940594	K19	19	K	W0002091	2.873342832077857	3.0030928990422483	360	Compound
Pi+_PNA-	70	434	16.129032258064516	K20	20	K	W0002091	2.873342832077857	3.0030928990422483	360	Compound
Pi+_PNA+	86	434	19.81566820276498	K20	20	K	W0002091	2.873342832077857	3.0030928990422483	360	Compound
Pi-_PNA+	1	434	0.2304147465437788	K20	20	K	W0002091	2.873342832077857	3.0030928990422483	360	Compound
Pi-_PNA-	277	434	63.824884792626726	K20	20	K	W0002091	2.873342832077857	3.0030928990422483	360	Compound
Pi+_PNA-	92	415	22.16867469879518	K21	21	K	W0002091	2.873342832077857	3.0030928990422483	360	Compound
Pi+_PNA+	86	415	20.722891566265062	K21	21	K	W0002091	2.873342832077857	3.0030928990422483	360	Compound
Pi-_PNA+	2	415	0.48192771084337355	K21	21	K	W0002091	2.873342832077857	3.0030928990422483	360	Compound
Pi-_PNA-	235	415	56.62650602409639	K21	21	K	W0002091	2.873342832077857	3.0030928990422483	360	Compound
Pi+_PNA-	62	530	11.69811320754717	K22	22	K	W0002091	2.873342832077857	3.0030928990422483	360	Compound
Pi+_PNA+	85	530	16.037735849056602	K22	22	K	W0002091	2.873342832077857	3.0030928990422483	360	Compound
Pi-_PNA+	2	530	0.37735849056603776	K22	22	K	W0002091	2.873342832077857	3.0030928990422483	360	Compound
Pi-_PNA-	381	530	71.88679245283018	K22	22	K	W0002091	2.873342832077857	3.0030928990422483	360	Compound
Pi+_PNA-	109	436	25	K23	23	K	W0002091	2.873342832077857	3.0030928990422483	360	Positive Control
Pi+_PNA+	55	436	12.614678899082568	K23	23	K	W0002091	2.873342832077857	3.0030928990422483	360	Positive Control
Pi-_PNA+	4	436	0.9174311926605505	K23	23	K	W0002091	2.873342832077857	3.0030928990422483	360	Positive Control
Pi-_PNA-	268	436	61.46788990825688	K23	23	K	W0002091	2.873342832077857	3.0030928990422483	360	Positive Control
Pi+_PNA-	55	517	10.638297872340425	K24	24	K	W0002091	2.873342832077857	3.0030928990422483	360	Negative Control
Pi+_PNA+	94	517	18.181818181818183	K24	24	K	W0002091	2.873342832077857	3.0030928990422483	360	Negative Control
Pi-_PNA+	6	517	1.160541586073501	K24	24	K	W0002091	2.873342832077857	3.0030928990422483	360	Negative Control
Pi-_PNA-	362	517	70.01934235976789	K24	24	K	W0002091	2.873342832077857	3.0030928990422483	360	Negative Control
Pi+_PNA-	63	617	10.21069692058347	L01	01	L	W0002091	2.873342832077857	3.0030928990422483	360	Compound
Pi+_PNA+	62	617	10.048622366288493	L01	01	L	W0002091	2.873342832077857	3.0030928990422483	360	Compound
Pi-_PNA+	5	617	0.8103727714748784	L01	01	L	W0002091	2.873342832077857	3.0030928990422483	360	Compound
Pi-_PNA-	487	617	78.93030794165315	L01	01	L	W0002091	2.873342832077857	3.0030928990422483	360	Compound
Pi+_PNA-	53	627	8.452950558213717	L02	02	L	W0002091	2.873342832077857	3.0030928990422483	360	Compound
Pi+_PNA+	87	627	13.875598086124402	L02	02	L	W0002091	2.873342832077857	3.0030928990422483	360	Compound
Pi-_PNA+	10	627	1.5948963317384368	L02	02	L	W0002091	2.873342832077857	3.0030928990422483	360	Compound
Pi-_PNA-	477	627	76.07655502392345	L02	02	L	W0002091	2.873342832077857	3.0030928990422483	360	Compound
Pi+_PNA-	84	644	13.043478260869565	L03	03	L	W0002091	2.873342832077857	3.0030928990422483	360	Compound
Pi+_PNA+	69	644	10.714285714285714	L03	03	L	W0002091	2.873342832077857	3.0030928990422483	360	Compound
Pi-_PNA+	1	644	0.15527950310559005	L03	03	L	W0002091	2.873342832077857	3.0030928990422483	360	Compound
Pi-_PNA-	490	644	76.08695652173914	L03	03	L	W0002091	2.873342832077857	3.0030928990422483	360	Compound
Pi+_PNA-	71	571	12.43432574430823	L04	04	L	W0002091	2.873342832077857	3.0030928990422483	360	Compound
Pi+_PNA+	71	571	12.43432574430823	L04	04	L	W0002091	2.873342832077857	3.0030928990422483	360	Compound
Pi-_PNA+	1	571	0.17513134851138354	L04	04	L	W0002091	2.873342832077857	3.0030928990422483	360	Compound
Pi-_PNA-	428	571	74.95621716287215	L04	04	L	W0002091	2.873342832077857	3.0030928990422483	360	Compound
Pi+_PNA-	59	465	12.688172043010754	L05	05	L	W0002091	2.873342832077857	3.0030928990422483	360	Compound
Pi+_PNA+	74	465	15.913978494623656	L05	05	L	W0002091	2.873342832077857	3.0030928990422483	360	Compound
Pi-_PNA+	1	465	0.21505376344086022	L05	05	L	W0002091	2.873342832077857	3.0030928990422483	360	Compound
Pi-_PNA-	331	465	71.18279569892472	L05	05	L	W0002091	2.873342832077857	3.0030928990422483	360	Compound
Pi+_PNA-	72	471	15.286624203821656	L06	06	L	W0002091	2.873342832077857	3.0030928990422483	360	Compound
Pi+_PNA+	64	471	13.588110403397028	L06	06	L	W0002091	2.873342832077857	3.0030928990422483	360	Compound
Pi-_PNA+	3	471	0.6369426751592357	L06	06	L	W0002091	2.873342832077857	3.0030928990422483	360	Compound
Pi-_PNA-	332	471	70.48832271762208	L06	06	L	W0002091	2.873342832077857	3.0030928990422483	360	Compound
Pi+_PNA-	80	520	15.384615384615385	L07	07	L	W0002091	2.873342832077857	3.0030928990422483	360	Compound
Pi+_PNA+	66	520	12.692307692307692	L07	07	L	W0002091	2.873342832077857	3.0030928990422483	360	Compound
Pi-_PNA+	4	520	0.7692307692307693	L07	07	L	W0002091	2.873342832077857	3.0030928990422483	360	Compound
Pi-_PNA-	370	520	71.15384615384616	L07	07	L	W0002091	2.873342832077857	3.0030928990422483	360	Compound
Pi+_PNA-	58	501	11.57684630738523	L08	08	L	W0002091	2.873342832077857	3.0030928990422483	360	Compound
Pi+_PNA+	71	501	14.171656686626747	L08	08	L	W0002091	2.873342832077857	3.0030928990422483	360	Compound
Pi-_PNA+	4	501	0.7984031936127743	L08	08	L	W0002091	2.873342832077857	3.0030928990422483	360	Compound
Pi-_PNA-	368	501	73.45309381237524	L08	08	L	W0002091	2.873342832077857	3.0030928990422483	360	Compound
Pi+_PNA-	57	518	11.003861003861005	L09	09	L	W0002091	2.873342832077857	3.0030928990422483	360	Compound
Pi+_PNA+	81	518	15.637065637065636	L09	09	L	W0002091	2.873342832077857	3.0030928990422483	360	Compound
Pi-_PNA+	4	518	0.7722007722007722	L09	09	L	W0002091	2.873342832077857	3.0030928990422483	360	Compound
Pi-_PNA-	376	518	72.58687258687259	L09	09	L	W0002091	2.873342832077857	3.0030928990422483	360	Compound
Pi+_PNA-	82	568	14.43661971830986	L10	10	L	W0002091	2.873342832077857	3.0030928990422483	360	Compound
Pi+_PNA+	73	568	12.852112676056338	L10	10	L	W0002091	2.873342832077857	3.0030928990422483	360	Compound
Pi-_PNA+	4	568	0.7042253521126761	L10	10	L	W0002091	2.873342832077857	3.0030928990422483	360	Compound
Pi-_PNA-	409	568	72.00704225352112	L10	10	L	W0002091	2.873342832077857	3.0030928990422483	360	Compound
Pi+_PNA-	49	442	11.085972850678733	L11	11	L	W0002091	2.873342832077857	3.0030928990422483	360	Compound
Pi+_PNA+	60	442	13.574660633484163	L11	11	L	W0002091	2.873342832077857	3.0030928990422483	360	Compound
Pi-_PNA+	3	442	0.6787330316742082	L11	11	L	W0002091	2.873342832077857	3.0030928990422483	360	Compound
Pi-_PNA-	330	442	74.6606334841629	L11	11	L	W0002091	2.873342832077857	3.0030928990422483	360	Compound
Pi+_PNA-	58	435	13.333333333333334	L12	12	L	W0002091	2.873342832077857	3.0030928990422483	360	Compound
Pi+_PNA+	60	435	13.793103448275861	L12	12	L	W0002091	2.873342832077857	3.0030928990422483	360	Compound
Pi-_PNA+	2	435	0.45977011494252873	L12	12	L	W0002091	2.873342832077857	3.0030928990422483	360	Compound
Pi-_PNA-	315	435	72.41379310344827	L12	12	L	W0002091	2.873342832077857	3.0030928990422483	360	Compound
Pi+_PNA-	51	479	10.647181628392484	L13	13	L	W0002091	2.873342832077857	3.0030928990422483	360	Compound
Pi+_PNA+	60	479	12.526096033402922	L13	13	L	W0002091	2.873342832077857	3.0030928990422483	360	Compound
Pi-_PNA+	6	479	1.2526096033402923	L13	13	L	W0002091	2.873342832077857	3.0030928990422483	360	Compound
Pi-_PNA-	362	479	75.5741127348643	L13	13	L	W0002091	2.873342832077857	3.0030928990422483	360	Compound
Pi+_PNA-	74	476	15.546218487394958	L14	14	L	W0002091	2.873342832077857	3.0030928990422483	360	Compound
Pi+_PNA+	63	476	13.23529411764706	L14	14	L	W0002091	2.873342832077857	3.0030928990422483	360	Compound
Pi-_PNA+	5	476	1.050420168067227	L14	14	L	W0002091	2.873342832077857	3.0030928990422483	360	Compound
Pi-_PNA-	334	476	70.16806722689076	L14	14	L	W0002091	2.873342832077857	3.0030928990422483	360	Compound
Pi+_PNA-	74	428	17.289719626168225	L15	15	L	W0002091	2.873342832077857	3.0030928990422483	360	Compound
Pi+_PNA+	60	428	14.018691588785046	L15	15	L	W0002091	2.873342832077857	3.0030928990422483	360	Compound
Pi-_PNA+	1	428	0.23364485981308408	L15	15	L	W0002091	2.873342832077857	3.0030928990422483	360	Compound
Pi-_PNA-	293	428	68.45794392523365	L15	15	L	W0002091	2.873342832077857	3.0030928990422483	360	Compound
Pi+_PNA-	52	440	11.818181818181818	L16	16	L	W0002091	2.873342832077857	3.0030928990422483	360	Compound
Pi+_PNA+	51	440	11.59090909090909	L16	16	L	W0002091	2.873342832077857	3.0030928990422483	360	Compound
Pi-_PNA+	5	440	1.1363636363636365	L16	16	L	W0002091	2.873342832077857	3.0030928990422483	360	Compound
Pi-_PNA-	332	440	75.45454545454545	L16	16	L	W0002091	2.873342832077857	3.0030928990422483	360	Compound
Pi+_PNA-	72	443	16.252821670428894	L17	17	L	W0002091	2.873342832077857	3.0030928990422483	360	Compound
Pi+_PNA+	68	443	15.349887133182843	L17	17	L	W0002091	2.873342832077857	3.0030928990422483	360	Compound
Pi-_PNA+	2	443	0.4514672686230248	L17	17	L	W0002091	2.873342832077857	3.0030928990422483	360	Compound
Pi-_PNA-	301	443	67.94582392776523	L17	17	L	W0002091	2.873342832077857	3.0030928990422483	360	Compound
Pi+_PNA-	62	401	15.46134663341646	L18	18	L	W0002091	2.873342832077857	3.0030928990422483	360	Compound
Pi+_PNA+	56	401	13.96508728179551	L18	18	L	W0002091	2.873342832077857	3.0030928990422483	360	Compound
Pi-_PNA+	2	401	0.4987531172069825	L18	18	L	W0002091	2.873342832077857	3.0030928990422483	360	Compound
Pi-_PNA-	281	401	70.07481296758104	L18	18	L	W0002091	2.873342832077857	3.0030928990422483	360	Compound
Pi+_PNA-	63	490	12.857142857142856	L19	19	L	W0002091	2.873342832077857	3.0030928990422483	360	Compound
Pi+_PNA+	134	490	27.346938775510203	L19	19	L	W0002091	2.873342832077857	3.0030928990422483	360	Compound
Pi-_PNA+	4	490	0.8163265306122449	L19	19	L	W0002091	2.873342832077857	3.0030928990422483	360	Compound
Pi-_PNA-	289	490	58.97959183673469	L19	19	L	W0002091	2.873342832077857	3.0030928990422483	360	Compound
Pi+_PNA-	72	438	16.43835616438356	L20	20	L	W0002091	2.873342832077857	3.0030928990422483	360	Compound
Pi+_PNA+	78	438	17.80821917808219	L20	20	L	W0002091	2.873342832077857	3.0030928990422483	360	Compound
Pi-_PNA+	1	438	0.228310502283105	L20	20	L	W0002091	2.873342832077857	3.0030928990422483	360	Compound
Pi-_PNA-	287	438	65.52511415525115	L20	20	L	W0002091	2.873342832077857	3.0030928990422483	360	Compound
Pi+_PNA-	65	464	14.00862068965517	L21	21	L	W0002091	2.873342832077857	3.0030928990422483	360	Compound
Pi+_PNA+	62	464	13.36206896551724	L21	21	L	W0002091	2.873342832077857	3.0030928990422483	360	Compound
Pi-_PNA+	4	464	0.8620689655172413	L21	21	L	W0002091	2.873342832077857	3.0030928990422483	360	Compound
Pi-_PNA-	333	464	71.76724137931035	L21	21	L	W0002091	2.873342832077857	3.0030928990422483	360	Compound
Pi+_PNA-	59	376	15.691489361702127	L22	22	L	W0002091	2.873342832077857	3.0030928990422483	360	Compound
Pi+_PNA+	62	376	16.48936170212766	L22	22	L	W0002091	2.873342832077857	3.0030928990422483	360	Compound
Pi-_PNA+	3	376	0.7978723404255319	L22	22	L	W0002091	2.873342832077857	3.0030928990422483	360	Compound
Pi-_PNA-	252	376	67.02127659574468	L22	22	L	W0002091	2.873342832077857	3.0030928990422483	360	Compound
Pi+_PNA-	68	298	22.818791946308725	L23	23	L	W0002091	2.873342832077857	3.0030928990422483	360	Positive Control
Pi+_PNA+	37	298	12.416107382550337	L23	23	L	W0002091	2.873342832077857	3.0030928990422483	360	Positive Control
Pi-_PNA+	2	298	0.6711409395973155	L23	23	L	W0002091	2.873342832077857	3.0030928990422483	360	Positive Control
Pi-_PNA-	191	298	64.09395973154362	L23	23	L	W0002091	2.873342832077857	3.0030928990422483	360	Positive Control
Pi+_PNA-	145	487	29.774127310061605	L24	24	L	W0002091	2.873342832077857	3.0030928990422483	360	Negative Control
Pi+_PNA+	7	487	1.4373716632443532	L24	24	L	W0002091	2.873342832077857	3.0030928990422483	360	Negative Control
Pi-_PNA+	0	487	0	L24	24	L	W0002091	2.873342832077857	3.0030928990422483	360	Negative Control
Pi-_PNA-	335	487	68.78850102669405	L24	24	L	W0002091	2.873342832077857	3.0030928990422483	360	Negative Control
Pi+_PNA-	61	960	6.354166666666666	M01	01	M	W0002091	2.873342832077857	3.0030928990422483	360	Compound
Pi+_PNA+	89	960	9.270833333333334	M01	01	M	W0002091	2.873342832077857	3.0030928990422483	360	Compound
Pi-_PNA+	5	960	0.5208333333333333	M01	01	M	W0002091	2.873342832077857	3.0030928990422483	360	Compound
Pi-_PNA-	805	960	83.85416666666666	M01	01	M	W0002091	2.873342832077857	3.0030928990422483	360	Compound
Pi+_PNA-	74	937	7.897545357524013	M02	02	M	W0002091	2.873342832077857	3.0030928990422483	360	Compound
Pi+_PNA+	129	937	13.767342582710778	M02	02	M	W0002091	2.873342832077857	3.0030928990422483	360	Compound
Pi-_PNA+	8	937	0.8537886872998933	M02	02	M	W0002091	2.873342832077857	3.0030928990422483	360	Compound
Pi-_PNA-	726	937	77.48132337246531	M02	02	M	W0002091	2.873342832077857	3.0030928990422483	360	Compound
Pi+_PNA-	66	771	8.560311284046692	M03	03	M	W0002091	2.873342832077857	3.0030928990422483	360	Compound
Pi+_PNA+	109	771	14.137483787289234	M03	03	M	W0002091	2.873342832077857	3.0030928990422483	360	Compound
Pi-_PNA+	1	771	0.12970168612191957	M03	03	M	W0002091	2.873342832077857	3.0030928990422483	360	Compound
Pi-_PNA-	595	771	77.17250324254216	M03	03	M	W0002091	2.873342832077857	3.0030928990422483	360	Compound
Pi+_PNA-	73	751	9.720372836218376	M04	04	M	W0002091	2.873342832077857	3.0030928990422483	360	Compound
Pi+_PNA+	89	751	11.8508655126498	M04	04	M	W0002091	2.873342832077857	3.0030928990422483	360	Compound
Pi-_PNA+	5	751	0.6657789613848202	M04	04	M	W0002091	2.873342832077857	3.0030928990422483	360	Compound
Pi-_PNA-	584	751	77.762982689747	M04	04	M	W0002091	2.873342832077857	3.0030928990422483	360	Compound
Pi+_PNA-	86	838	10.26252983293556	M05	05	M	W0002091	2.873342832077857	3.0030928990422483	360	Compound
Pi+_PNA+	104	838	12.410501193317423	M05	05	M	W0002091	2.873342832077857	3.0030928990422483	360	Compound
Pi-_PNA+	5	838	0.5966587112171837	M05	05	M	W0002091	2.873342832077857	3.0030928990422483	360	Compound
Pi-_PNA-	643	838	76.73031026252983	M05	05	M	W0002091	2.873342832077857	3.0030928990422483	360	Compound
Pi+_PNA-	68	691	9.84081041968162	M06	06	M	W0002091	2.873342832077857	3.0030928990422483	360	Compound
Pi+_PNA+	103	691	14.905933429811865	M06	06	M	W0002091	2.873342832077857	3.0030928990422483	360	Compound
Pi-_PNA+	9	691	1.3024602026049203	M06	06	M	W0002091	2.873342832077857	3.0030928990422483	360	Compound
Pi-_PNA-	511	691	73.9507959479016	M06	06	M	W0002091	2.873342832077857	3.0030928990422483	360	Compound
Pi+_PNA-	79	738	10.70460704607046	M07	07	M	W0002091	2.873342832077857	3.0030928990422483	360	Compound
Pi+_PNA+	84	738	11.38211382113821	M07	07	M	W0002091	2.873342832077857	3.0030928990422483	360	Compound
Pi-_PNA+	6	738	0.8130081300813009	M07	07	M	W0002091	2.873342832077857	3.0030928990422483	360	Compound
Pi-_PNA-	569	738	77.10027100271003	M07	07	M	W0002091	2.873342832077857	3.0030928990422483	360	Compound
Pi+_PNA-	73	710	10.28169014084507	M08	08	M	W0002091	2.873342832077857	3.0030928990422483	360	Compound
Pi+_PNA+	73	710	10.28169014084507	M08	08	M	W0002091	2.873342832077857	3.0030928990422483	360	Compound
Pi-_PNA+	5	710	0.7042253521126761	M08	08	M	W0002091	2.873342832077857	3.0030928990422483	360	Compound
Pi-_PNA-	559	710	78.73239436619718	M08	08	M	W0002091	2.873342832077857	3.0030928990422483	360	Compound
Pi+_PNA-	71	701	10.128388017118402	M09	09	M	W0002091	2.873342832077857	3.0030928990422483	360	Compound
Pi+_PNA+	82	701	11.697574893009985	M09	09	M	W0002091	2.873342832077857	3.0030928990422483	360	Compound
Pi-_PNA+	3	701	0.42796005706134094	M09	09	M	W0002091	2.873342832077857	3.0030928990422483	360	Compound
Pi-_PNA-	545	701	77.74607703281026	M09	09	M	W0002091	2.873342832077857	3.0030928990422483	360	Compound
Pi+_PNA-	63	554	11.371841155234657	M10	10	M	W0002091	2.873342832077857	3.0030928990422483	360	Compound
Pi+_PNA+	79	554	14.259927797833935	M10	10	M	W0002091	2.873342832077857	3.0030928990422483	360	Compound
Pi-_PNA+	5	554	0.9025270758122743	M10	10	M	W0002091	2.873342832077857	3.0030928990422483	360	Compound
Pi-_PNA-	407	554	73.46570397111914	M10	10	M	W0002091	2.873342832077857	3.0030928990422483	360	Compound
Pi+_PNA-	60	633	9.47867298578199	M11	11	M	W0002091	2.873342832077857	3.0030928990422483	360	Compound
Pi+_PNA+	81	633	12.796208530805686	M11	11	M	W0002091	2.873342832077857	3.0030928990422483	360	Compound
Pi-_PNA+	5	633	0.7898894154818324	M11	11	M	W0002091	2.873342832077857	3.0030928990422483	360	Compound
Pi-_PNA-	487	633	76.93522906793049	M11	11	M	W0002091	2.873342832077857	3.0030928990422483	360	Compound
Pi+_PNA-	55	725	7.586206896551724	M12	12	M	W0002091	2.873342832077857	3.0030928990422483	360	Compound
Pi+_PNA+	94	725	12.96551724137931	M12	12	M	W0002091	2.873342832077857	3.0030928990422483	360	Compound
Pi-_PNA+	12	725	1.6551724137931034	M12	12	M	W0002091	2.873342832077857	3.0030928990422483	360	Compound
Pi-_PNA-	564	725	77.79310344827586	M12	12	M	W0002091	2.873342832077857	3.0030928990422483	360	Compound
Pi+_PNA-	70	631	11.09350237717908	M13	13	M	W0002091	2.873342832077857	3.0030928990422483	360	Compound
Pi+_PNA+	55	631	8.716323296354993	M13	13	M	W0002091	2.873342832077857	3.0030928990422483	360	Compound
Pi-_PNA+	5	631	0.7923930269413629	M13	13	M	W0002091	2.873342832077857	3.0030928990422483	360	Compound
Pi-_PNA-	501	631	79.39778129952457	M13	13	M	W0002091	2.873342832077857	3.0030928990422483	360	Compound
Pi+_PNA-	67	672	9.970238095238097	M14	14	M	W0002091	2.873342832077857	3.0030928990422483	360	Compound
Pi+_PNA+	94	672	13.988095238095239	M14	14	M	W0002091	2.873342832077857	3.0030928990422483	360	Compound
Pi-_PNA+	5	672	0.744047619047619	M14	14	M	W0002091	2.873342832077857	3.0030928990422483	360	Compound
Pi-_PNA-	506	672	75.29761904761905	M14	14	M	W0002091	2.873342832077857	3.0030928990422483	360	Compound
Pi+_PNA-	44	592	7.4324324324324325	M15	15	M	W0002091	2.873342832077857	3.0030928990422483	360	Compound
Pi+_PNA+	61	592	10.304054054054054	M15	15	M	W0002091	2.873342832077857	3.0030928990422483	360	Compound
Pi-_PNA+	6	592	1.0135135135135136	M15	15	M	W0002091	2.873342832077857	3.0030928990422483	360	Compound
Pi-_PNA-	481	592	81.25	M15	15	M	W0002091	2.873342832077857	3.0030928990422483	360	Compound
Pi+_PNA-	58	613	9.461663947797716	M16	16	M	W0002091	2.873342832077857	3.0030928990422483	360	Compound
Pi+_PNA+	95	613	15.497553017944535	M16	16	M	W0002091	2.873342832077857	3.0030928990422483	360	Compound
Pi-_PNA+	7	613	1.1419249592169658	M16	16	M	W0002091	2.873342832077857	3.0030928990422483	360	Compound
Pi-_PNA-	453	613	73.89885807504079	M16	16	M	W0002091	2.873342832077857	3.0030928990422483	360	Compound
Pi+_PNA-	64	678	9.43952802359882	M17	17	M	W0002091	2.873342832077857	3.0030928990422483	360	Compound
Pi+_PNA+	99	678	14.601769911504425	M17	17	M	W0002091	2.873342832077857	3.0030928990422483	360	Compound
Pi-_PNA+	4	678	0.5899705014749262	M17	17	M	W0002091	2.873342832077857	3.0030928990422483	360	Compound
Pi-_PNA-	511	678	75.36873156342183	M17	17	M	W0002091	2.873342832077857	3.0030928990422483	360	Compound
Pi+_PNA-	60	698	8.595988538681947	M18	18	M	W0002091	2.873342832077857	3.0030928990422483	360	Compound
Pi+_PNA+	104	698	14.899713467048711	M18	18	M	W0002091	2.873342832077857	3.0030928990422483	360	Compound
Pi-_PNA+	6	698	0.8595988538681949	M18	18	M	W0002091	2.873342832077857	3.0030928990422483	360	Compound
Pi-_PNA-	528	698	75.64469914040114	M18	18	M	W0002091	2.873342832077857	3.0030928990422483	360	Compound
Pi+_PNA-	58	625	9.28	M19	19	M	W0002091	2.873342832077857	3.0030928990422483	360	Compound
Pi+_PNA+	83	625	13.28	M19	19	M	W0002091	2.873342832077857	3.0030928990422483	360	Compound
Pi-_PNA+	4	625	0.64	M19	19	M	W0002091	2.873342832077857	3.0030928990422483	360	Compound
Pi-_PNA-	480	625	76.8	M19	19	M	W0002091	2.873342832077857	3.0030928990422483	360	Compound
Pi+_PNA-	52	559	9.30232558139535	M20	20	M	W0002091	2.873342832077857	3.0030928990422483	360	Compound
Pi+_PNA+	88	559	15.742397137745975	M20	20	M	W0002091	2.873342832077857	3.0030928990422483	360	Compound
Pi-_PNA+	12	559	2.146690518783542	M20	20	M	W0002091	2.873342832077857	3.0030928990422483	360	Compound
Pi-_PNA-	407	559	72.80858676207514	M20	20	M	W0002091	2.873342832077857	3.0030928990422483	360	Compound
Pi+_PNA-	64	585	10.94017094017094	M21	21	M	W0002091	2.873342832077857	3.0030928990422483	360	Compound
Pi+_PNA+	81	585	13.846153846153847	M21	21	M	W0002091	2.873342832077857	3.0030928990422483	360	Compound
Pi-_PNA+	5	585	0.8547008547008548	M21	21	M	W0002091	2.873342832077857	3.0030928990422483	360	Compound
Pi-_PNA-	435	585	74.35897435897436	M21	21	M	W0002091	2.873342832077857	3.0030928990422483	360	Compound
Pi+_PNA-	77	473	16.27906976744186	M22	22	M	W0002091	2.873342832077857	3.0030928990422483	360	Compound
Pi+_PNA+	67	473	14.16490486257928	M22	22	M	W0002091	2.873342832077857	3.0030928990422483	360	Compound
Pi-_PNA+	5	473	1.0570824524312896	M22	22	M	W0002091	2.873342832077857	3.0030928990422483	360	Compound
Pi-_PNA-	324	473	68.49894291754757	M22	22	M	W0002091	2.873342832077857	3.0030928990422483	360	Compound
Pi+_PNA-	91	409	22.249388753056234	M23	23	M	W0002091	2.873342832077857	3.0030928990422483	360	Positive Control
Pi+_PNA+	58	409	14.180929095354522	M23	23	M	W0002091	2.873342832077857	3.0030928990422483	360	Positive Control
Pi-_PNA+	6	409	1.466992665036675	M23	23	M	W0002091	2.873342832077857	3.0030928990422483	360	Positive Control
Pi-_PNA-	254	409	62.10268948655256	M23	23	M	W0002091	2.873342832077857	3.0030928990422483	360	Positive Control
Pi+_PNA-	67	583	11.49228130360206	M24	24	M	W0002091	2.873342832077857	3.0030928990422483	360	Negative Control
Pi+_PNA+	105	583	18.010291595197256	M24	24	M	W0002091	2.873342832077857	3.0030928990422483	360	Negative Control
Pi-_PNA+	23	583	3.9451114922813035	M24	24	M	W0002091	2.873342832077857	3.0030928990422483	360	Negative Control
Pi-_PNA-	388	583	66.55231560891939	M24	24	M	W0002091	2.873342832077857	3.0030928990422483	360	Negative Control
Pi+_PNA-	117	879	13.310580204778159	N01	01	N	W0002091	2.873342832077857	3.0030928990422483	360	Compound
Pi+_PNA+	5	879	0.5688282138794084	N01	01	N	W0002091	2.873342832077857	3.0030928990422483	360	Compound
Pi-_PNA+	1	879	0.11376564277588168	N01	01	N	W0002091	2.873342832077857	3.0030928990422483	360	Compound
Pi-_PNA-	756	879	86.00682593856655	N01	01	N	W0002091	2.873342832077857	3.0030928990422483	360	Compound
Pi+_PNA-	76	988	7.6923076923076925	N02	02	N	W0002091	2.873342832077857	3.0030928990422483	360	Compound
Pi+_PNA+	80	988	8.097165991902834	N02	02	N	W0002091	2.873342832077857	3.0030928990422483	360	Compound
Pi-_PNA+	6	988	0.6072874493927125	N02	02	N	W0002091	2.873342832077857	3.0030928990422483	360	Compound
Pi-_PNA-	826	988	83.60323886639675	N02	02	N	W0002091	2.873342832077857	3.0030928990422483	360	Compound
Pi+_PNA-	84	899	9.343715239154617	N03	03	N	W0002091	2.873342832077857	3.0030928990422483	360	Compound
Pi+_PNA+	92	899	10.233592880978867	N03	03	N	W0002091	2.873342832077857	3.0030928990422483	360	Compound
Pi-_PNA+	6	899	0.6674082313681869	N03	03	N	W0002091	2.873342832077857	3.0030928990422483	360	Compound
Pi-_PNA-	717	899	79.75528364849833	N03	03	N	W0002091	2.873342832077857	3.0030928990422483	360	Compound
Pi+_PNA-	78	942	8.280254777070063	N04	04	N	W0002091	2.873342832077857	3.0030928990422483	360	Compound
Pi+_PNA+	105	942	11.146496815286625	N04	04	N	W0002091	2.873342832077857	3.0030928990422483	360	Compound
Pi-_PNA+	6	942	0.6369426751592357	N04	04	N	W0002091	2.873342832077857	3.0030928990422483	360	Compound
Pi-_PNA-	753	942	79.93630573248409	N04	04	N	W0002091	2.873342832077857	3.0030928990422483	360	Compound
Pi+_PNA-	56	900	6.222222222222222	N05	05	N	W0002091	2.873342832077857	3.0030928990422483	360	Compound
Pi+_PNA+	105	900	11.666666666666666	N05	05	N	W0002091	2.873342832077857	3.0030928990422483	360	Compound
Pi-_PNA+	5	900	0.5555555555555556	N05	05	N	W0002091	2.873342832077857	3.0030928990422483	360	Compound
Pi-_PNA-	734	900	81.55555555555556	N05	05	N	W0002091	2.873342832077857	3.0030928990422483	360	Compound
Pi+_PNA-	72	960	7.5	N06	06	N	W0002091	2.873342832077857	3.0030928990422483	360	Compound
Pi+_PNA+	90	960	9.375	N06	06	N	W0002091	2.873342832077857	3.0030928990422483	360	Compound
Pi-_PNA+	7	960	0.7291666666666666	N06	06	N	W0002091	2.873342832077857	3.0030928990422483	360	Compound
Pi-_PNA-	791	960	82.39583333333333	N06	06	N	W0002091	2.873342832077857	3.0030928990422483	360	Compound
Pi+_PNA-	31	697	4.447632711621234	N07	07	N	W0002091	2.873342832077857	3.0030928990422483	360	Compound
Pi+_PNA+	58	697	8.321377331420372	N07	07	N	W0002091	2.873342832077857	3.0030928990422483	360	Compound
Pi-_PNA+	11	697	1.5781922525107603	N07	07	N	W0002091	2.873342832077857	3.0030928990422483	360	Compound
Pi-_PNA-	597	697	85.65279770444764	N07	07	N	W0002091	2.873342832077857	3.0030928990422483	360	Compound
Pi+_PNA-	51	730	6.986301369863014	N08	08	N	W0002091	2.873342832077857	3.0030928990422483	360	Compound
Pi+_PNA+	63	730	8.63013698630137	N08	08	N	W0002091	2.873342832077857	3.0030928990422483	360	Compound
Pi-_PNA+	7	730	0.9589041095890412	N08	08	N	W0002091	2.873342832077857	3.0030928990422483	360	Compound
Pi-_PNA-	609	730	83.42465753424658	N08	08	N	W0002091	2.873342832077857	3.0030928990422483	360	Compound
Pi+_PNA-	79	899	8.78754171301446	N09	09	N	W0002091	2.873342832077857	3.0030928990422483	360	Compound
Pi+_PNA+	65	899	7.230255839822025	N09	09	N	W0002091	2.873342832077857	3.0030928990422483	360	Compound
Pi-_PNA+	6	899	0.6674082313681869	N09	09	N	W0002091	2.873342832077857	3.0030928990422483	360	Compound
Pi-_PNA-	749	899	83.31479421579533	N09	09	N	W0002091	2.873342832077857	3.0030928990422483	360	Compound
Pi+_PNA-	82	856	9.579439252336448	N10	10	N	W0002091	2.873342832077857	3.0030928990422483	360	Compound
Pi+_PNA+	84	856	9.813084112149532	N10	10	N	W0002091	2.873342832077857	3.0030928990422483	360	Compound
Pi-_PNA+	6	856	0.7009345794392523	N10	10	N	W0002091	2.873342832077857	3.0030928990422483	360	Compound
Pi-_PNA-	684	856	79.90654205607477	N10	10	N	W0002091	2.873342832077857	3.0030928990422483	360	Compound
Pi+_PNA-	62	745	8.322147651006711	N11	11	N	W0002091	2.873342832077857	3.0030928990422483	360	Compound
Pi+_PNA+	70	745	9.395973154362416	N11	11	N	W0002091	2.873342832077857	3.0030928990422483	360	Compound
Pi-_PNA+	5	745	0.6711409395973155	N11	11	N	W0002091	2.873342832077857	3.0030928990422483	360	Compound
Pi-_PNA-	608	745	81.61073825503355	N11	11	N	W0002091	2.873342832077857	3.0030928990422483	360	Compound
Pi+_PNA-	49	903	5.426356589147287	N12	12	N	W0002091	2.873342832077857	3.0030928990422483	360	Compound
Pi+_PNA+	76	903	8.416389811738648	N12	12	N	W0002091	2.873342832077857	3.0030928990422483	360	Compound
Pi-_PNA+	6	903	0.6644518272425249	N12	12	N	W0002091	2.873342832077857	3.0030928990422483	360	Compound
Pi-_PNA-	772	903	85.49280177187154	N12	12	N	W0002091	2.873342832077857	3.0030928990422483	360	Compound
Pi+_PNA-	60	816	7.352941176470589	N13	13	N	W0002091	2.873342832077857	3.0030928990422483	360	Compound
Pi+_PNA+	64	816	7.8431372549019605	N13	13	N	W0002091	2.873342832077857	3.0030928990422483	360	Compound
Pi-_PNA+	4	816	0.49019607843137253	N13	13	N	W0002091	2.873342832077857	3.0030928990422483	360	Compound
Pi-_PNA-	688	816	84.31372549019608	N13	13	N	W0002091	2.873342832077857	3.0030928990422483	360	Compound
Pi+_PNA-	54	725	7.448275862068964	N14	14	N	W0002091	2.873342832077857	3.0030928990422483	360	Compound
Pi+_PNA+	82	725	11.310344827586206	N14	14	N	W0002091	2.873342832077857	3.0030928990422483	360	Compound
Pi-_PNA+	3	725	0.41379310344827586	N14	14	N	W0002091	2.873342832077857	3.0030928990422483	360	Compound
Pi-_PNA-	586	725	80.82758620689656	N14	14	N	W0002091	2.873342832077857	3.0030928990422483	360	Compound
Pi+_PNA-	59	740	7.972972972972974	N15	15	N	W0002091	2.873342832077857	3.0030928990422483	360	Compound
Pi+_PNA+	65	740	8.783783783783784	N15	15	N	W0002091	2.873342832077857	3.0030928990422483	360	Compound
Pi-_PNA+	4	740	0.5405405405405406	N15	15	N	W0002091	2.873342832077857	3.0030928990422483	360	Compound
Pi-_PNA-	612	740	82.70270270270271	N15	15	N	W0002091	2.873342832077857	3.0030928990422483	360	Compound
Pi+_PNA-	57	694	8.213256484149856	N16	16	N	W0002091	2.873342832077857	3.0030928990422483	360	Compound
Pi+_PNA+	63	694	9.077809798270893	N16	16	N	W0002091	2.873342832077857	3.0030928990422483	360	Compound
Pi-_PNA+	1	694	0.1440922190201729	N16	16	N	W0002091	2.873342832077857	3.0030928990422483	360	Compound
Pi-_PNA-	573	694	82.56484149855908	N16	16	N	W0002091	2.873342832077857	3.0030928990422483	360	Compound
Pi+_PNA-	63	706	8.923512747875353	N17	17	N	W0002091	2.873342832077857	3.0030928990422483	360	Compound
Pi+_PNA+	84	706	11.89801699716714	N17	17	N	W0002091	2.873342832077857	3.0030928990422483	360	Compound
Pi-_PNA+	0	706	0	N17	17	N	W0002091	2.873342832077857	3.0030928990422483	360	Compound
Pi-_PNA-	559	706	79.17847025495752	N17	17	N	W0002091	2.873342832077857	3.0030928990422483	360	Compound
Pi+_PNA-	62	702	8.831908831908832	N18	18	N	W0002091	2.873342832077857	3.0030928990422483	360	Compound
Pi+_PNA+	70	702	9.971509971509972	N18	18	N	W0002091	2.873342832077857	3.0030928990422483	360	Compound
Pi-_PNA+	2	702	0.2849002849002849	N18	18	N	W0002091	2.873342832077857	3.0030928990422483	360	Compound
Pi-_PNA-	568	702	80.91168091168092	N18	18	N	W0002091	2.873342832077857	3.0030928990422483	360	Compound
Pi+_PNA-	50	727	6.87757909215956	N19	19	N	W0002091	2.873342832077857	3.0030928990422483	360	Compound
Pi+_PNA+	74	727	10.178817056396149	N19	19	N	W0002091	2.873342832077857	3.0030928990422483	360	Compound
Pi-_PNA+	6	727	0.8253094910591471	N19	19	N	W0002091	2.873342832077857	3.0030928990422483	360	Compound
Pi-_PNA-	597	727	82.11829436038515	N19	19	N	W0002091	2.873342832077857	3.0030928990422483	360	Compound
Pi+_PNA-	55	573	9.598603839441536	N20	20	N	W0002091	2.873342832077857	3.0030928990422483	360	Compound
Pi+_PNA+	47	573	8.202443280977311	N20	20	N	W0002091	2.873342832077857	3.0030928990422483	360	Compound
Pi-_PNA+	3	573	0.5235602094240838	N20	20	N	W0002091	2.873342832077857	3.0030928990422483	360	Compound
Pi-_PNA-	468	573	81.67539267015707	N20	20	N	W0002091	2.873342832077857	3.0030928990422483	360	Compound
Pi+_PNA-	50	596	8.389261744966444	N21	21	N	W0002091	2.873342832077857	3.0030928990422483	360	Compound
Pi+_PNA+	67	596	11.241610738255034	N21	21	N	W0002091	2.873342832077857	3.0030928990422483	360	Compound
Pi-_PNA+	6	596	1.006711409395973	N21	21	N	W0002091	2.873342832077857	3.0030928990422483	360	Compound
Pi-_PNA-	473	596	79.36241610738254	N21	21	N	W0002091	2.873342832077857	3.0030928990422483	360	Compound
Pi+_PNA-	20	591	3.3840947546531304	N22	22	N	W0002091	2.873342832077857	3.0030928990422483	360	Compound
Pi+_PNA+	4	591	0.676818950930626	N22	22	N	W0002091	2.873342832077857	3.0030928990422483	360	Compound
Pi-_PNA+	0	591	0	N22	22	N	W0002091	2.873342832077857	3.0030928990422483	360	Compound
Pi-_PNA-	567	591	95.93908629441624	N22	22	N	W0002091	2.873342832077857	3.0030928990422483	360	Compound
Pi+_PNA-	101	432	23.37962962962963	N23	23	N	W0002091	2.873342832077857	3.0030928990422483	360	Positive Control
Pi+_PNA+	56	432	12.962962962962962	N23	23	N	W0002091	2.873342832077857	3.0030928990422483	360	Positive Control
Pi-_PNA+	8	432	1.8518518518518516	N23	23	N	W0002091	2.873342832077857	3.0030928990422483	360	Positive Control
Pi-_PNA-	267	432	61.80555555555556	N23	23	N	W0002091	2.873342832077857	3.0030928990422483	360	Positive Control
Pi+_PNA-	78	754	10.344827586206897	N24	24	N	W0002091	2.873342832077857	3.0030928990422483	360	Negative Control
Pi+_PNA+	100	754	13.262599469496022	N24	24	N	W0002091	2.873342832077857	3.0030928990422483	360	Negative Control
Pi-_PNA+	12	754	1.5915119363395225	N24	24	N	W0002091	2.873342832077857	3.0030928990422483	360	Negative Control
Pi-_PNA-	564	754	74.80106100795756	N24	24	N	W0002091	2.873342832077857	3.0030928990422483	360	Negative Control
Pi+_PNA-	79	1310	6.030534351145038	O01	01	O	W0002091	2.873342832077857	3.0030928990422483	360	Compound
Pi+_PNA+	145	1310	11.068702290076336	O01	01	O	W0002091	2.873342832077857	3.0030928990422483	360	Compound
Pi-_PNA+	10	1310	0.7633587786259541	O01	01	O	W0002091	2.873342832077857	3.0030928990422483	360	Compound
Pi-_PNA-	1076	1310	82.13740458015268	O01	01	O	W0002091	2.873342832077857	3.0030928990422483	360	Compound
Pi+_PNA-	68	1146	5.93368237347295	O02	02	O	W0002091	2.873342832077857	3.0030928990422483	360	Compound
Pi+_PNA+	141	1146	12.30366492146597	O02	02	O	W0002091	2.873342832077857	3.0030928990422483	360	Compound
Pi-_PNA+	7	1146	0.6108202443280977	O02	02	O	W0002091	2.873342832077857	3.0030928990422483	360	Compound
Pi-_PNA-	930	1146	81.15183246073299	O02	02	O	W0002091	2.873342832077857	3.0030928990422483	360	Compound
Pi+_PNA-	70	1038	6.74373795761079	O03	03	O	W0002091	2.873342832077857	3.0030928990422483	360	Compound
Pi+_PNA+	99	1038	9.53757225433526	O03	03	O	W0002091	2.873342832077857	3.0030928990422483	360	Compound
Pi-_PNA+	5	1038	0.48169556840077066	O03	03	O	W0002091	2.873342832077857	3.0030928990422483	360	Compound
Pi-_PNA-	864	1038	83.23699421965318	O03	03	O	W0002091	2.873342832077857	3.0030928990422483	360	Compound
Pi+_PNA-	87	1086	8.011049723756907	O04	04	O	W0002091	2.873342832077857	3.0030928990422483	360	Compound
Pi+_PNA+	111	1086	10.220994475138122	O04	04	O	W0002091	2.873342832077857	3.0030928990422483	360	Compound
Pi-_PNA+	6	1086	0.5524861878453038	O04	04	O	W0002091	2.873342832077857	3.0030928990422483	360	Compound
Pi-_PNA-	882	1086	81.21546961325967	O04	04	O	W0002091	2.873342832077857	3.0030928990422483	360	Compound
Pi+_PNA-	99	1095	9.04109589041096	O05	05	O	W0002091	2.873342832077857	3.0030928990422483	360	Compound
Pi+_PNA+	116	1095	10.593607305936073	O05	05	O	W0002091	2.873342832077857	3.0030928990422483	360	Compound
Pi-_PNA+	9	1095	0.821917808219178	O05	05	O	W0002091	2.873342832077857	3.0030928990422483	360	Compound
Pi-_PNA-	871	1095	79.54337899543378	O05	05	O	W0002091	2.873342832077857	3.0030928990422483	360	Compound
Pi+_PNA-	84	1055	7.9620853080568725	O06	06	O	W0002091	2.873342832077857	3.0030928990422483	360	Compound
Pi+_PNA+	92	1055	8.72037914691943	O06	06	O	W0002091	2.873342832077857	3.0030928990422483	360	Compound
Pi-_PNA+	22	1055	2.085308056872038	O06	06	O	W0002091	2.873342832077857	3.0030928990422483	360	Compound
Pi-_PNA-	857	1055	81.23222748815165	O06	06	O	W0002091	2.873342832077857	3.0030928990422483	360	Compound
Pi+_PNA-	66	1025	6.439024390243903	O07	07	O	W0002091	2.873342832077857	3.0030928990422483	360	Compound
Pi+_PNA+	101	1025	9.853658536585366	O07	07	O	W0002091	2.873342832077857	3.0030928990422483	360	Compound
Pi-_PNA+	8	1025	0.7804878048780488	O07	07	O	W0002091	2.873342832077857	3.0030928990422483	360	Compound
Pi-_PNA-	850	1025	82.92682926829268	O07	07	O	W0002091	2.873342832077857	3.0030928990422483	360	Compound
Pi+_PNA-	64	960	6.666666666666667	O08	08	O	W0002091	2.873342832077857	3.0030928990422483	360	Compound
Pi+_PNA+	79	960	8.229166666666666	O08	08	O	W0002091	2.873342832077857	3.0030928990422483	360	Compound
Pi-_PNA+	7	960	0.7291666666666666	O08	08	O	W0002091	2.873342832077857	3.0030928990422483	360	Compound
Pi-_PNA-	810	960	84.375	O08	08	O	W0002091	2.873342832077857	3.0030928990422483	360	Compound
Pi+_PNA-	64	974	6.570841889117044	O09	09	O	W0002091	2.873342832077857	3.0030928990422483	360	Compound
Pi+_PNA+	101	974	10.369609856262834	O09	09	O	W0002091	2.873342832077857	3.0030928990422483	360	Compound
Pi-_PNA+	10	974	1.0266940451745379	O09	09	O	W0002091	2.873342832077857	3.0030928990422483	360	Compound
Pi-_PNA-	799	974	82.03285420944559	O09	09	O	W0002091	2.873342832077857	3.0030928990422483	360	Compound
Pi+_PNA-	73	896	8.147321428571429	O10	10	O	W0002091	2.873342832077857	3.0030928990422483	360	Compound
Pi+_PNA+	80	896	8.928571428571429	O10	10	O	W0002091	2.873342832077857	3.0030928990422483	360	Compound
Pi-_PNA+	4	896	0.4464285714285714	O10	10	O	W0002091	2.873342832077857	3.0030928990422483	360	Compound
Pi-_PNA-	739	896	82.47767857142857	O10	10	O	W0002091	2.873342832077857	3.0030928990422483	360	Compound
Pi+_PNA-	98	875	11.200000000000001	O11	11	O	W0002091	2.873342832077857	3.0030928990422483	360	Compound
Pi+_PNA+	97	875	11.085714285714285	O11	11	O	W0002091	2.873342832077857	3.0030928990422483	360	Compound
Pi-_PNA+	1	875	0.1142857142857143	O11	11	O	W0002091	2.873342832077857	3.0030928990422483	360	Compound
Pi-_PNA-	679	875	77.60000000000001	O11	11	O	W0002091	2.873342832077857	3.0030928990422483	360	Compound
Pi+_PNA-	72	919	7.834602829162132	O12	12	O	W0002091	2.873342832077857	3.0030928990422483	360	Compound
Pi+_PNA+	86	919	9.357997823721437	O12	12	O	W0002091	2.873342832077857	3.0030928990422483	360	Compound
Pi-_PNA+	7	919	0.7616974972796519	O12	12	O	W0002091	2.873342832077857	3.0030928990422483	360	Compound
Pi-_PNA-	754	919	82.04570184983679	O12	12	O	W0002091	2.873342832077857	3.0030928990422483	360	Compound
Pi+_PNA-	76	1051	7.2312083729781165	O13	13	O	W0002091	2.873342832077857	3.0030928990422483	360	Compound
Pi+_PNA+	90	1051	8.563273073263558	O13	13	O	W0002091	2.873342832077857	3.0030928990422483	360	Compound
Pi-_PNA+	9	1051	0.8563273073263558	O13	13	O	W0002091	2.873342832077857	3.0030928990422483	360	Compound
Pi-_PNA-	876	1051	83.34919124643197	O13	13	O	W0002091	2.873342832077857	3.0030928990422483	360	Compound
Pi+_PNA-	82	1013	8.094768015794669	O14	14	O	W0002091	2.873342832077857	3.0030928990422483	360	Compound
Pi+_PNA+	81	1013	7.996051332675222	O14	14	O	W0002091	2.873342832077857	3.0030928990422483	360	Compound
Pi-_PNA+	2	1013	0.19743336623889435	O14	14	O	W0002091	2.873342832077857	3.0030928990422483	360	Compound
Pi-_PNA-	848	1013	83.71174728529121	O14	14	O	W0002091	2.873342832077857	3.0030928990422483	360	Compound
Pi+_PNA-	96	889	10.798650168728908	O15	15	O	W0002091	2.873342832077857	3.0030928990422483	360	Compound
Pi+_PNA+	106	889	11.923509561304838	O15	15	O	W0002091	2.873342832077857	3.0030928990422483	360	Compound
Pi-_PNA+	8	889	0.8998875140607425	O15	15	O	W0002091	2.873342832077857	3.0030928990422483	360	Compound
Pi-_PNA-	679	889	76.37795275590551	O15	15	O	W0002091	2.873342832077857	3.0030928990422483	360	Compound
Pi+_PNA-	60	959	6.256517205422315	O16	16	O	W0002091	2.873342832077857	3.0030928990422483	360	Compound
Pi+_PNA+	70	959	7.2992700729927	O16	16	O	W0002091	2.873342832077857	3.0030928990422483	360	Compound
Pi-_PNA+	7	959	0.7299270072992701	O16	16	O	W0002091	2.873342832077857	3.0030928990422483	360	Compound
Pi-_PNA-	822	959	85.71428571428571	O16	16	O	W0002091	2.873342832077857	3.0030928990422483	360	Compound
Pi+_PNA-	86	948	9.071729957805907	O17	17	O	W0002091	2.873342832077857	3.0030928990422483	360	Compound
Pi+_PNA+	103	948	10.864978902953586	O17	17	O	W0002091	2.873342832077857	3.0030928990422483	360	Compound
Pi-_PNA+	10	948	1.0548523206751055	O17	17	O	W0002091	2.873342832077857	3.0030928990422483	360	Compound
Pi-_PNA-	749	948	79.0084388185654	O17	17	O	W0002091	2.873342832077857	3.0030928990422483	360	Compound
Pi+_PNA-	62	893	6.9428891377379625	O18	18	O	W0002091	2.873342832077857	3.0030928990422483	360	Compound
Pi+_PNA+	78	893	8.734602463605823	O18	18	O	W0002091	2.873342832077857	3.0030928990422483	360	Compound
Pi-_PNA+	9	893	1.007838745800672	O18	18	O	W0002091	2.873342832077857	3.0030928990422483	360	Compound
Pi-_PNA-	744	893	83.31466965285554	O18	18	O	W0002091	2.873342832077857	3.0030928990422483	360	Compound
Pi+_PNA-	73	1037	7.03953712632594	O19	19	O	W0002091	2.873342832077857	3.0030928990422483	360	Compound
Pi+_PNA+	114	1037	10.99324975891996	O19	19	O	W0002091	2.873342832077857	3.0030928990422483	360	Compound
Pi-_PNA+	8	1037	0.7714561234329798	O19	19	O	W0002091	2.873342832077857	3.0030928990422483	360	Compound
Pi-_PNA-	842	1037	81.19575699132112	O19	19	O	W0002091	2.873342832077857	3.0030928990422483	360	Compound
Pi+_PNA-	66	990	6.666666666666667	O20	20	O	W0002091	2.873342832077857	3.0030928990422483	360	Compound
Pi+_PNA+	106	990	10.707070707070706	O20	20	O	W0002091	2.873342832077857	3.0030928990422483	360	Compound
Pi-_PNA+	6	990	0.6060606060606061	O20	20	O	W0002091	2.873342832077857	3.0030928990422483	360	Compound
Pi-_PNA-	812	990	82.02020202020202	O20	20	O	W0002091	2.873342832077857	3.0030928990422483	360	Compound
Pi+_PNA-	98	879	11.149032992036405	O21	21	O	W0002091	2.873342832077857	3.0030928990422483	360	Compound
Pi+_PNA+	111	879	12.627986348122866	O21	21	O	W0002091	2.873342832077857	3.0030928990422483	360	Compound
Pi-_PNA+	9	879	1.023890784982935	O21	21	O	W0002091	2.873342832077857	3.0030928990422483	360	Compound
Pi-_PNA-	661	879	75.19908987485779	O21	21	O	W0002091	2.873342832077857	3.0030928990422483	360	Compound
Pi+_PNA-	93	966	9.627329192546584	O22	22	O	W0002091	2.873342832077857	3.0030928990422483	360	Compound
Pi+_PNA+	112	966	11.594202898550725	O22	22	O	W0002091	2.873342832077857	3.0030928990422483	360	Compound
Pi-_PNA+	6	966	0.6211180124223602	O22	22	O	W0002091	2.873342832077857	3.0030928990422483	360	Compound
Pi-_PNA-	755	966	78.15734989648033	O22	22	O	W0002091	2.873342832077857	3.0030928990422483	360	Compound
Pi+_PNA-	212	661	32.07261724659607	O23	23	O	W0002091	2.873342832077857	3.0030928990422483	360	Positive Control
Pi+_PNA+	80	661	12.102874432677762	O23	23	O	W0002091	2.873342832077857	3.0030928990422483	360	Positive Control
Pi-_PNA+	18	661	2.723146747352496	O23	23	O	W0002091	2.873342832077857	3.0030928990422483	360	Positive Control
Pi-_PNA-	351	661	53.10136157337367	O23	23	O	W0002091	2.873342832077857	3.0030928990422483	360	Positive Control
Pi+_PNA-	85	1045	8.133971291866029	O24	24	O	W0002091	2.873342832077857	3.0030928990422483	360	Negative Control
Pi+_PNA+	158	1045	15.119617224880383	O24	24	O	W0002091	2.873342832077857	3.0030928990422483	360	Negative Control
Pi-_PNA+	19	1045	1.8181818181818181	O24	24	O	W0002091	2.873342832077857	3.0030928990422483	360	Negative Control
Pi-_PNA-	783	1045	74.92822966507177	O24	24	O	W0002091	2.873342832077857	3.0030928990422483	360	Negative Control
Pi+_PNA-	131	1152	11.371527777777777	P01	01	P	W0002091	2.873342832077857	3.0030928990422483	360	Compound
Pi+_PNA+	121	1152	10.503472222222223	P01	01	P	W0002091	2.873342832077857	3.0030928990422483	360	Compound
Pi-_PNA+	9	1152	0.78125	P01	01	P	W0002091	2.873342832077857	3.0030928990422483	360	Compound
Pi-_PNA-	891	1152	77.34375	P01	01	P	W0002091	2.873342832077857	3.0030928990422483	360	Compound
Pi+_PNA-	100	1078	9.276437847866418	P02	02	P	W0002091	2.873342832077857	3.0030928990422483	360	Compound
Pi+_PNA+	121	1078	11.224489795918368	P02	02	P	W0002091	2.873342832077857	3.0030928990422483	360	Compound
Pi-_PNA+	3	1078	0.27829313543599254	P02	02	P	W0002091	2.873342832077857	3.0030928990422483	360	Compound
Pi-_PNA-	854	1078	79.22077922077922	P02	02	P	W0002091	2.873342832077857	3.0030928990422483	360	Compound
Pi+_PNA-	117	848	13.797169811320757	P03	03	P	W0002091	2.873342832077857	3.0030928990422483	360	Compound
Pi+_PNA+	64	848	7.547169811320755	P03	03	P	W0002091	2.873342832077857	3.0030928990422483	360	Compound
Pi-_PNA+	9	848	1.0613207547169812	P03	03	P	W0002091	2.873342832077857	3.0030928990422483	360	Compound
Pi-_PNA-	658	848	77.59433962264151	P03	03	P	W0002091	2.873342832077857	3.0030928990422483	360	Compound
Pi+_PNA-	119	1101	10.80835603996367	P04	04	P	W0002091	2.873342832077857	3.0030928990422483	360	Compound
Pi+_PNA+	117	1101	10.626702997275205	P04	04	P	W0002091	2.873342832077857	3.0030928990422483	360	Compound
Pi-_PNA+	5	1101	0.4541326067211626	P04	04	P	W0002091	2.873342832077857	3.0030928990422483	360	Compound
Pi-_PNA-	860	1101	78.11080835603997	P04	04	P	W0002091	2.873342832077857	3.0030928990422483	360	Compound
Pi+_PNA-	88	1093	8.051235132662397	P05	05	P	W0002091	2.873342832077857	3.0030928990422483	360	Compound
Pi+_PNA+	107	1093	9.789569990850868	P05	05	P	W0002091	2.873342832077857	3.0030928990422483	360	Compound
Pi-_PNA+	6	1093	0.5489478499542544	P05	05	P	W0002091	2.873342832077857	3.0030928990422483	360	Compound
Pi-_PNA-	892	1093	81.61024702653248	P05	05	P	W0002091	2.873342832077857	3.0030928990422483	360	Compound
Pi+_PNA-	76	1115	6.816143497757847	P06	06	P	W0002091	2.873342832077857	3.0030928990422483	360	Compound
Pi+_PNA+	101	1115	9.058295964125561	P06	06	P	W0002091	2.873342832077857	3.0030928990422483	360	Compound
Pi-_PNA+	4	1115	0.35874439461883406	P06	06	P	W0002091	2.873342832077857	3.0030928990422483	360	Compound
Pi-_PNA-	934	1115	83.76681614349776	P06	06	P	W0002091	2.873342832077857	3.0030928990422483	360	Compound
Pi+_PNA-	97	1176	8.24829931972789	P07	07	P	W0002091	2.873342832077857	3.0030928990422483	360	Compound
Pi+_PNA+	118	1176	10.034013605442176	P07	07	P	W0002091	2.873342832077857	3.0030928990422483	360	Compound
Pi-_PNA+	7	1176	0.5952380952380952	P07	07	P	W0002091	2.873342832077857	3.0030928990422483	360	Compound
Pi-_PNA-	954	1176	81.12244897959184	P07	07	P	W0002091	2.873342832077857	3.0030928990422483	360	Compound
Pi+_PNA-	114	1130	10.08849557522124	P08	08	P	W0002091	2.873342832077857	3.0030928990422483	360	Compound
Pi+_PNA+	111	1130	9.823008849557523	P08	08	P	W0002091	2.873342832077857	3.0030928990422483	360	Compound
Pi-_PNA+	11	1130	0.9734513274336283	P08	08	P	W0002091	2.873342832077857	3.0030928990422483	360	Compound
Pi-_PNA-	894	1130	79.11504424778761	P08	08	P	W0002091	2.873342832077857	3.0030928990422483	360	Compound
Pi+_PNA-	112	1247	8.981555733761027	P09	09	P	W0002091	2.873342832077857	3.0030928990422483	360	Compound
Pi+_PNA+	154	1247	12.34963913392141	P09	09	P	W0002091	2.873342832077857	3.0030928990422483	360	Compound
Pi-_PNA+	15	1247	1.202886928628709	P09	09	P	W0002091	2.873342832077857	3.0030928990422483	360	Compound
Pi-_PNA-	966	1247	77.46591820368886	P09	09	P	W0002091	2.873342832077857	3.0030928990422483	360	Compound
Pi+_PNA-	99	1013	9.772951628825272	P10	10	P	W0002091	2.873342832077857	3.0030928990422483	360	Compound
Pi+_PNA+	105	1013	10.365251727541954	P10	10	P	W0002091	2.873342832077857	3.0030928990422483	360	Compound
Pi-_PNA+	3	1013	0.29615004935834155	P10	10	P	W0002091	2.873342832077857	3.0030928990422483	360	Compound
Pi-_PNA-	806	1013	79.56564659427443	P10	10	P	W0002091	2.873342832077857	3.0030928990422483	360	Compound
Pi+_PNA-	111	1050	10.571428571428571	P11	11	P	W0002091	2.873342832077857	3.0030928990422483	360	Compound
Pi+_PNA+	108	1050	10.285714285714285	P11	11	P	W0002091	2.873342832077857	3.0030928990422483	360	Compound
Pi-_PNA+	4	1050	0.38095238095238093	P11	11	P	W0002091	2.873342832077857	3.0030928990422483	360	Compound
Pi-_PNA-	827	1050	78.76190476190476	P11	11	P	W0002091	2.873342832077857	3.0030928990422483	360	Compound
Pi+_PNA-	102	1075	9.488372093023257	P12	12	P	W0002091	2.873342832077857	3.0030928990422483	360	Compound
Pi+_PNA+	101	1075	9.395348837209303	P12	12	P	W0002091	2.873342832077857	3.0030928990422483	360	Compound
Pi-_PNA+	12	1075	1.1162790697674418	P12	12	P	W0002091	2.873342832077857	3.0030928990422483	360	Compound
Pi-_PNA-	860	1075	80	P12	12	P	W0002091	2.873342832077857	3.0030928990422483	360	Compound
Pi+_PNA-	118	1111	10.621062106210621	P13	13	P	W0002091	2.873342832077857	3.0030928990422483	360	Compound
Pi+_PNA+	126	1111	11.341134113411341	P13	13	P	W0002091	2.873342832077857	3.0030928990422483	360	Compound
Pi-_PNA+	14	1111	1.2601260126012601	P13	13	P	W0002091	2.873342832077857	3.0030928990422483	360	Compound
Pi-_PNA-	853	1111	76.77767776777678	P13	13	P	W0002091	2.873342832077857	3.0030928990422483	360	Compound
Pi+_PNA-	87	1012	8.596837944664031	P14	14	P	W0002091	2.873342832077857	3.0030928990422483	360	Compound
Pi+_PNA+	90	1012	8.893280632411066	P14	14	P	W0002091	2.873342832077857	3.0030928990422483	360	Compound
Pi-_PNA+	9	1012	0.8893280632411068	P14	14	P	W0002091	2.873342832077857	3.0030928990422483	360	Compound
Pi-_PNA-	826	1012	81.62055335968378	P14	14	P	W0002091	2.873342832077857	3.0030928990422483	360	Compound
Pi+_PNA-	105	918	11.437908496732026	P15	15	P	W0002091	2.873342832077857	3.0030928990422483	360	Compound
Pi+_PNA+	111	918	12.091503267973856	P15	15	P	W0002091	2.873342832077857	3.0030928990422483	360	Compound
Pi-_PNA+	4	918	0.4357298474945534	P15	15	P	W0002091	2.873342832077857	3.0030928990422483	360	Compound
Pi-_PNA-	698	918	76.03485838779956	P15	15	P	W0002091	2.873342832077857	3.0030928990422483	360	Compound
Pi+_PNA-	116	1170	9.914529914529915	P16	16	P	W0002091	2.873342832077857	3.0030928990422483	360	Compound
Pi+_PNA+	139	1170	11.880341880341879	P16	16	P	W0002091	2.873342832077857	3.0030928990422483	360	Compound
Pi-_PNA+	13	1170	1.1111111111111112	P16	16	P	W0002091	2.873342832077857	3.0030928990422483	360	Compound
Pi-_PNA-	902	1170	77.0940170940171	P16	16	P	W0002091	2.873342832077857	3.0030928990422483	360	Compound
Pi+_PNA-	106	1155	9.177489177489177	P17	17	P	W0002091	2.873342832077857	3.0030928990422483	360	Compound
Pi+_PNA+	96	1155	8.311688311688311	P17	17	P	W0002091	2.873342832077857	3.0030928990422483	360	Compound
Pi-_PNA+	17	1155	1.471861471861472	P17	17	P	W0002091	2.873342832077857	3.0030928990422483	360	Compound
Pi-_PNA-	936	1155	81.03896103896105	P17	17	P	W0002091	2.873342832077857	3.0030928990422483	360	Compound
Pi+_PNA-	98	955	10.261780104712042	P18	18	P	W0002091	2.873342832077857	3.0030928990422483	360	Compound
Pi+_PNA+	108	955	11.30890052356021	P18	18	P	W0002091	2.873342832077857	3.0030928990422483	360	Compound
Pi-_PNA+	9	955	0.9424083769633508	P18	18	P	W0002091	2.873342832077857	3.0030928990422483	360	Compound
Pi-_PNA-	740	955	77.4869109947644	P18	18	P	W0002091	2.873342832077857	3.0030928990422483	360	Compound
Pi+_PNA-	117	1117	10.474485228290064	P19	19	P	W0002091	2.873342832077857	3.0030928990422483	360	Compound
Pi+_PNA+	120	1117	10.743061772605191	P19	19	P	W0002091	2.873342832077857	3.0030928990422483	360	Compound
Pi-_PNA+	16	1117	1.432408236347359	P19	19	P	W0002091	2.873342832077857	3.0030928990422483	360	Compound
Pi-_PNA-	864	1117	77.35004476275739	P19	19	P	W0002091	2.873342832077857	3.0030928990422483	360	Compound
Pi+_PNA-	69	988	6.983805668016195	P20	20	P	W0002091	2.873342832077857	3.0030928990422483	360	Compound
Pi+_PNA+	88	988	8.906882591093117	P20	20	P	W0002091	2.873342832077857	3.0030928990422483	360	Compound
Pi-_PNA+	14	988	1.417004048582996	P20	20	P	W0002091	2.873342832077857	3.0030928990422483	360	Compound
Pi-_PNA-	817	988	82.6923076923077	P20	20	P	W0002091	2.873342832077857	3.0030928990422483	360	Compound
Pi+_PNA-	91	960	9.479166666666666	P21	21	P	W0002091	2.873342832077857	3.0030928990422483	360	Compound
Pi+_PNA+	104	960	10.833333333333334	P21	21	P	W0002091	2.873342832077857	3.0030928990422483	360	Compound
Pi-_PNA+	10	960	1.0416666666666665	P21	21	P	W0002091	2.873342832077857	3.0030928990422483	360	Compound
Pi-_PNA-	755	960	78.64583333333334	P21	21	P	W0002091	2.873342832077857	3.0030928990422483	360	Compound
Pi+_PNA-	89	929	9.580193756727665	P22	22	P	W0002091	2.873342832077857	3.0030928990422483	360	Compound
Pi+_PNA+	117	929	12.594187298170075	P22	22	P	W0002091	2.873342832077857	3.0030928990422483	360	Compound
Pi-_PNA+	4	929	0.4305705059203444	P22	22	P	W0002091	2.873342832077857	3.0030928990422483	360	Compound
Pi-_PNA-	719	929	77.3950484391819	P22	22	P	W0002091	2.873342832077857	3.0030928990422483	360	Compound
Pi+_PNA-	204	995	20.502512562814072	P23	23	P	W0002091	2.873342832077857	3.0030928990422483	360	Positive Control
Pi+_PNA+	100	995	10.050251256281408	P23	23	P	W0002091	2.873342832077857	3.0030928990422483	360	Positive Control
Pi-_PNA+	28	995	2.814070351758794	P23	23	P	W0002091	2.873342832077857	3.0030928990422483	360	Positive Control
Pi-_PNA-	663	995	66.63316582914572	P23	23	P	W0002091	2.873342832077857	3.0030928990422483	360	Positive Control
Pi+_PNA-	85	883	9.626274065685164	P24	24	P	W0002091	2.873342832077857	3.0030928990422483	360	Negative Control
Pi+_PNA+	116	883	13.137032842582105	P24	24	P	W0002091	2.873342832077857	3.0030928990422483	360	Negative Control
Pi-_PNA+	17	883	1.9252548131370328	P24	24	P	W0002091	2.873342832077857	3.0030928990422483	360	Negative Control
Pi-_PNA-	665	883	75.3114382785957	P24	24	P	W0002091	2.873342832077857	3.0030928990422483	360	Negative Control
Pi+_PNA-	45	300	15	A01	01	A	W0002541	3.0069687505398854	2.9808759465659307	384	Compound
Pi+_PNA+	20	300	6.666666666666667	A01	01	A	W0002541	3.0069687505398854	2.9808759465659307	384	Compound
Pi-_PNA+	7	300	2.3333333333333335	A01	01	A	W0002541	3.0069687505398854	2.9808759465659307	384	Compound
Pi-_PNA-	228	300	76	A01	01	A	W0002541	3.0069687505398854	2.9808759465659307	384	Compound
Pi+_PNA-	123	538	22.86245353159851	A02	02	A	W0002541	3.0069687505398854	2.9808759465659307	384	Compound
Pi+_PNA+	1	538	0.18587360594795538	A02	02	A	W0002541	3.0069687505398854	2.9808759465659307	384	Compound
Pi-_PNA+	0	538	0	A02	02	A	W0002541	3.0069687505398854	2.9808759465659307	384	Compound
Pi-_PNA-	414	538	76.95167286245353	A02	02	A	W0002541	3.0069687505398854	2.9808759465659307	384	Compound
Pi+_PNA-	86	432	19.90740740740741	A03	03	A	W0002541	3.0069687505398854	2.9808759465659307	384	Compound
Pi+_PNA+	3	432	0.6944444444444444	A03	03	A	W0002541	3.0069687505398854	2.9808759465659307	384	Compound
Pi-_PNA+	2	432	0.4629629629629629	A03	03	A	W0002541	3.0069687505398854	2.9808759465659307	384	Compound
Pi-_PNA-	341	432	78.93518518518519	A03	03	A	W0002541	3.0069687505398854	2.9808759465659307	384	Compound
Pi+_PNA-	123	601	20.465890183028286	A04	04	A	W0002541	3.0069687505398854	2.9808759465659307	384	Compound
Pi+_PNA+	44	601	7.321131447587355	A04	04	A	W0002541	3.0069687505398854	2.9808759465659307	384	Compound
Pi-_PNA+	3	601	0.49916805324459235	A04	04	A	W0002541	3.0069687505398854	2.9808759465659307	384	Compound
Pi-_PNA-	431	601	71.71381031613977	A04	04	A	W0002541	3.0069687505398854	2.9808759465659307	384	Compound
Pi+_PNA-	119	581	20.481927710843372	A05	05	A	W0002541	3.0069687505398854	2.9808759465659307	384	Compound
Pi+_PNA+	64	581	11.015490533562824	A05	05	A	W0002541	3.0069687505398854	2.9808759465659307	384	Compound
Pi-_PNA+	3	581	0.5163511187607573	A05	05	A	W0002541	3.0069687505398854	2.9808759465659307	384	Compound
Pi-_PNA-	395	581	67.98623063683304	A05	05	A	W0002541	3.0069687505398854	2.9808759465659307	384	Compound
Pi+_PNA-	119	617	19.286871961102108	A06	06	A	W0002541	3.0069687505398854	2.9808759465659307	384	Compound
Pi+_PNA+	14	617	2.2690437601296596	A06	06	A	W0002541	3.0069687505398854	2.9808759465659307	384	Compound
Pi-_PNA+	2	617	0.3241491085899514	A06	06	A	W0002541	3.0069687505398854	2.9808759465659307	384	Compound
Pi-_PNA-	482	617	78.11993517017828	A06	06	A	W0002541	3.0069687505398854	2.9808759465659307	384	Compound
Pi+_PNA-	141	596	23.657718120805367	A07	07	A	W0002541	3.0069687505398854	2.9808759465659307	384	Compound
Pi+_PNA+	0	596	0	A07	07	A	W0002541	3.0069687505398854	2.9808759465659307	384	Compound
Pi-_PNA+	2	596	0.33557046979865773	A07	07	A	W0002541	3.0069687505398854	2.9808759465659307	384	Compound
Pi-_PNA-	453	596	76.00671140939598	A07	07	A	W0002541	3.0069687505398854	2.9808759465659307	384	Compound
Pi+_PNA-	121	556	21.762589928057555	A08	08	A	W0002541	3.0069687505398854	2.9808759465659307	384	Compound
Pi+_PNA+	65	556	11.690647482014388	A08	08	A	W0002541	3.0069687505398854	2.9808759465659307	384	Compound
Pi-_PNA+	2	556	0.3597122302158274	A08	08	A	W0002541	3.0069687505398854	2.9808759465659307	384	Compound
Pi-_PNA-	368	556	66.18705035971223	A08	08	A	W0002541	3.0069687505398854	2.9808759465659307	384	Compound
Pi+_PNA-	88	499	17.635270541082164	A09	09	A	W0002541	3.0069687505398854	2.9808759465659307	384	Compound
Pi+_PNA+	49	499	9.819639278557114	A09	09	A	W0002541	3.0069687505398854	2.9808759465659307	384	Compound
Pi-_PNA+	3	499	0.6012024048096193	A09	09	A	W0002541	3.0069687505398854	2.9808759465659307	384	Compound
Pi-_PNA-	359	499	71.9438877755511	A09	09	A	W0002541	3.0069687505398854	2.9808759465659307	384	Compound
Pi+_PNA-	79	455	17.36263736263736	A10	10	A	W0002541	3.0069687505398854	2.9808759465659307	384	Compound
Pi+_PNA+	22	455	4.835164835164836	A10	10	A	W0002541	3.0069687505398854	2.9808759465659307	384	Compound
Pi-_PNA+	6	455	1.3186813186813187	A10	10	A	W0002541	3.0069687505398854	2.9808759465659307	384	Compound
Pi-_PNA-	348	455	76.48351648351648	A10	10	A	W0002541	3.0069687505398854	2.9808759465659307	384	Compound
Pi+_PNA-	88	456	19.298245614035086	A11	11	A	W0002541	3.0069687505398854	2.9808759465659307	384	Compound
Pi+_PNA+	38	456	8.333333333333332	A11	11	A	W0002541	3.0069687505398854	2.9808759465659307	384	Compound
Pi-_PNA+	3	456	0.6578947368421052	A11	11	A	W0002541	3.0069687505398854	2.9808759465659307	384	Compound
Pi-_PNA-	327	456	71.71052631578947	A11	11	A	W0002541	3.0069687505398854	2.9808759465659307	384	Compound
Pi+_PNA-	133	599	22.20367278797997	A12	12	A	W0002541	3.0069687505398854	2.9808759465659307	384	Compound
Pi+_PNA+	44	599	7.345575959933222	A12	12	A	W0002541	3.0069687505398854	2.9808759465659307	384	Compound
Pi-_PNA+	1	599	0.1669449081803005	A12	12	A	W0002541	3.0069687505398854	2.9808759465659307	384	Compound
Pi-_PNA-	421	599	70.2838063439065	A12	12	A	W0002541	3.0069687505398854	2.9808759465659307	384	Compound
Pi+_PNA-	126	567	22.22222222222222	A13	13	A	W0002541	3.0069687505398854	2.9808759465659307	384	Compound
Pi+_PNA+	32	567	5.64373897707231	A13	13	A	W0002541	3.0069687505398854	2.9808759465659307	384	Compound
Pi-_PNA+	0	567	0	A13	13	A	W0002541	3.0069687505398854	2.9808759465659307	384	Compound
Pi-_PNA-	409	567	72.13403880070547	A13	13	A	W0002541	3.0069687505398854	2.9808759465659307	384	Compound
Pi+_PNA-	120	515	23.300970873786408	A14	14	A	W0002541	3.0069687505398854	2.9808759465659307	384	Compound
Pi+_PNA+	0	515	0	A14	14	A	W0002541	3.0069687505398854	2.9808759465659307	384	Compound
Pi-_PNA+	0	515	0	A14	14	A	W0002541	3.0069687505398854	2.9808759465659307	384	Compound
Pi-_PNA-	395	515	76.69902912621359	A14	14	A	W0002541	3.0069687505398854	2.9808759465659307	384	Compound
Pi+_PNA-	115	488	23.565573770491806	A15	15	A	W0002541	3.0069687505398854	2.9808759465659307	384	Compound
Pi+_PNA+	30	488	6.147540983606557	A15	15	A	W0002541	3.0069687505398854	2.9808759465659307	384	Compound
Pi-_PNA+	3	488	0.6147540983606558	A15	15	A	W0002541	3.0069687505398854	2.9808759465659307	384	Compound
Pi-_PNA-	340	488	69.67213114754098	A15	15	A	W0002541	3.0069687505398854	2.9808759465659307	384	Compound
Pi+_PNA-	132	668	19.760479041916167	A16	16	A	W0002541	3.0069687505398854	2.9808759465659307	384	Compound
Pi+_PNA+	44	668	6.58682634730539	A16	16	A	W0002541	3.0069687505398854	2.9808759465659307	384	Compound
Pi-_PNA+	0	668	0	A16	16	A	W0002541	3.0069687505398854	2.9808759465659307	384	Compound
Pi-_PNA-	492	668	73.65269461077844	A16	16	A	W0002541	3.0069687505398854	2.9808759465659307	384	Compound
Pi+_PNA-	101	484	20.867768595041323	A17	17	A	W0002541	3.0069687505398854	2.9808759465659307	384	Compound
Pi+_PNA+	39	484	8.057851239669422	A17	17	A	W0002541	3.0069687505398854	2.9808759465659307	384	Compound
Pi-_PNA+	2	484	0.4132231404958678	A17	17	A	W0002541	3.0069687505398854	2.9808759465659307	384	Compound
Pi-_PNA-	342	484	70.66115702479338	A17	17	A	W0002541	3.0069687505398854	2.9808759465659307	384	Compound
Pi+_PNA-	102	518	19.69111969111969	A18	18	A	W0002541	3.0069687505398854	2.9808759465659307	384	Compound
Pi+_PNA+	37	518	7.142857142857142	A18	18	A	W0002541	3.0069687505398854	2.9808759465659307	384	Compound
Pi-_PNA+	1	518	0.19305019305019305	A18	18	A	W0002541	3.0069687505398854	2.9808759465659307	384	Compound
Pi-_PNA-	378	518	72.97297297297297	A18	18	A	W0002541	3.0069687505398854	2.9808759465659307	384	Compound
Pi+_PNA-	109	505	21.584158415841586	A19	19	A	W0002541	3.0069687505398854	2.9808759465659307	384	Compound
Pi+_PNA+	44	505	8.712871287128712	A19	19	A	W0002541	3.0069687505398854	2.9808759465659307	384	Compound
Pi-_PNA+	0	505	0	A19	19	A	W0002541	3.0069687505398854	2.9808759465659307	384	Compound
Pi-_PNA-	352	505	69.7029702970297	A19	19	A	W0002541	3.0069687505398854	2.9808759465659307	384	Compound
Pi+_PNA-	115	556	20.68345323741007	A20	20	A	W0002541	3.0069687505398854	2.9808759465659307	384	Compound
Pi+_PNA+	50	556	8.992805755395683	A20	20	A	W0002541	3.0069687505398854	2.9808759465659307	384	Compound
Pi-_PNA+	4	556	0.7194244604316548	A20	20	A	W0002541	3.0069687505398854	2.9808759465659307	384	Compound
Pi-_PNA-	387	556	69.60431654676259	A20	20	A	W0002541	3.0069687505398854	2.9808759465659307	384	Compound
Pi+_PNA-	111	552	20.108695652173914	A21	21	A	W0002541	3.0069687505398854	2.9808759465659307	384	Compound
Pi+_PNA+	54	552	9.782608695652174	A21	21	A	W0002541	3.0069687505398854	2.9808759465659307	384	Compound
Pi-_PNA+	2	552	0.36231884057971014	A21	21	A	W0002541	3.0069687505398854	2.9808759465659307	384	Compound
Pi-_PNA-	385	552	69.7463768115942	A21	21	A	W0002541	3.0069687505398854	2.9808759465659307	384	Compound
Pi+_PNA-	79	473	16.701902748414376	A22	22	A	W0002541	3.0069687505398854	2.9808759465659307	384	Compound
Pi+_PNA+	52	473	10.993657505285412	A22	22	A	W0002541	3.0069687505398854	2.9808759465659307	384	Compound
Pi-_PNA+	2	473	0.42283298097251587	A22	22	A	W0002541	3.0069687505398854	2.9808759465659307	384	Compound
Pi-_PNA-	340	473	71.8816067653277	A22	22	A	W0002541	3.0069687505398854	2.9808759465659307	384	Compound
Pi+_PNA-	101	561	18.003565062388592	A23	23	A	W0002541	3.0069687505398854	2.9808759465659307	384	Negative Control
Pi+_PNA+	33	561	5.88235294117647	A23	23	A	W0002541	3.0069687505398854	2.9808759465659307	384	Negative Control
Pi-_PNA+	13	561	2.3172905525846703	A23	23	A	W0002541	3.0069687505398854	2.9808759465659307	384	Negative Control
Pi-_PNA-	414	561	73.79679144385027	A23	23	A	W0002541	3.0069687505398854	2.9808759465659307	384	Negative Control
Pi+_PNA-	99	511	19.373776908023483	A24	24	A	W0002541	3.0069687505398854	2.9808759465659307	384	Positive Control
Pi+_PNA+	39	511	7.632093933463796	A24	24	A	W0002541	3.0069687505398854	2.9808759465659307	384	Positive Control
Pi-_PNA+	4	511	0.7827788649706457	A24	24	A	W0002541	3.0069687505398854	2.9808759465659307	384	Positive Control
Pi-_PNA-	369	511	72.21135029354208	A24	24	A	W0002541	3.0069687505398854	2.9808759465659307	384	Positive Control
Pi+_PNA-	90	539	16.697588126159555	B01	01	B	W0002541	3.0069687505398854	2.9808759465659307	384	Compound
Pi+_PNA+	55	539	10.204081632653061	B01	01	B	W0002541	3.0069687505398854	2.9808759465659307	384	Compound
Pi-_PNA+	6	539	1.1131725417439702	B01	01	B	W0002541	3.0069687505398854	2.9808759465659307	384	Compound
Pi-_PNA-	388	539	71.98515769944342	B01	01	B	W0002541	3.0069687505398854	2.9808759465659307	384	Compound
Pi+_PNA-	88	419	21.002386634844868	B02	02	B	W0002541	3.0069687505398854	2.9808759465659307	384	Compound
Pi+_PNA+	28	419	6.682577565632458	B02	02	B	W0002541	3.0069687505398854	2.9808759465659307	384	Compound
Pi-_PNA+	5	419	1.1933174224343674	B02	02	B	W0002541	3.0069687505398854	2.9808759465659307	384	Compound
Pi-_PNA-	298	419	71.1217183770883	B02	02	B	W0002541	3.0069687505398854	2.9808759465659307	384	Compound
Pi+_PNA-	88	385	22.857142857142858	B03	03	B	W0002541	3.0069687505398854	2.9808759465659307	384	Compound
Pi+_PNA+	17	385	4.415584415584416	B03	03	B	W0002541	3.0069687505398854	2.9808759465659307	384	Compound
Pi-_PNA+	1	385	0.2597402597402597	B03	03	B	W0002541	3.0069687505398854	2.9808759465659307	384	Compound
Pi-_PNA-	279	385	72.46753246753246	B03	03	B	W0002541	3.0069687505398854	2.9808759465659307	384	Compound
Pi+_PNA-	87	367	23.705722070844686	B04	04	B	W0002541	3.0069687505398854	2.9808759465659307	384	Compound
Pi+_PNA+	43	367	11.716621253405995	B04	04	B	W0002541	3.0069687505398854	2.9808759465659307	384	Compound
Pi-_PNA+	3	367	0.8174386920980926	B04	04	B	W0002541	3.0069687505398854	2.9808759465659307	384	Compound
Pi-_PNA-	234	367	63.76021798365122	B04	04	B	W0002541	3.0069687505398854	2.9808759465659307	384	Compound
Pi+_PNA-	79	466	16.95278969957082	B05	05	B	W0002541	3.0069687505398854	2.9808759465659307	384	Compound
Pi+_PNA+	0	466	0	B05	05	B	W0002541	3.0069687505398854	2.9808759465659307	384	Compound
Pi-_PNA+	1	466	0.2145922746781116	B05	05	B	W0002541	3.0069687505398854	2.9808759465659307	384	Compound
Pi-_PNA-	386	466	82.83261802575107	B05	05	B	W0002541	3.0069687505398854	2.9808759465659307	384	Compound
Pi+_PNA-	72	314	22.929936305732486	B06	06	B	W0002541	3.0069687505398854	2.9808759465659307	384	Compound
Pi+_PNA+	32	314	10.191082802547772	B06	06	B	W0002541	3.0069687505398854	2.9808759465659307	384	Compound
Pi-_PNA+	1	314	0.3184713375796179	B06	06	B	W0002541	3.0069687505398854	2.9808759465659307	384	Compound
Pi-_PNA-	209	314	66.56050955414013	B06	06	B	W0002541	3.0069687505398854	2.9808759465659307	384	Compound
Pi+_PNA-	81	362	22.375690607734807	B07	07	B	W0002541	3.0069687505398854	2.9808759465659307	384	Compound
Pi+_PNA+	42	362	11.602209944751381	B07	07	B	W0002541	3.0069687505398854	2.9808759465659307	384	Compound
Pi-_PNA+	2	362	0.5524861878453038	B07	07	B	W0002541	3.0069687505398854	2.9808759465659307	384	Compound
Pi-_PNA-	237	362	65.4696132596685	B07	07	B	W0002541	3.0069687505398854	2.9808759465659307	384	Compound
Pi+_PNA-	89	411	21.654501216545015	B08	08	B	W0002541	3.0069687505398854	2.9808759465659307	384	Compound
Pi+_PNA+	31	411	7.542579075425791	B08	08	B	W0002541	3.0069687505398854	2.9808759465659307	384	Compound
Pi-_PNA+	0	411	0	B08	08	B	W0002541	3.0069687505398854	2.9808759465659307	384	Compound
Pi-_PNA-	291	411	70.8029197080292	B08	08	B	W0002541	3.0069687505398854	2.9808759465659307	384	Compound
Pi+_PNA-	72	372	19.35483870967742	B09	09	B	W0002541	3.0069687505398854	2.9808759465659307	384	Compound
Pi+_PNA+	42	372	11.29032258064516	B09	09	B	W0002541	3.0069687505398854	2.9808759465659307	384	Compound
Pi-_PNA+	0	372	0	B09	09	B	W0002541	3.0069687505398854	2.9808759465659307	384	Compound
Pi-_PNA-	258	372	69.35483870967742	B09	09	B	W0002541	3.0069687505398854	2.9808759465659307	384	Compound
Pi+_PNA-	78	456	17.105263157894736	B10	10	B	W0002541	3.0069687505398854	2.9808759465659307	384	Compound
Pi+_PNA+	35	456	7.675438596491229	B10	10	B	W0002541	3.0069687505398854	2.9808759465659307	384	Compound
Pi-_PNA+	3	456	0.6578947368421052	B10	10	B	W0002541	3.0069687505398854	2.9808759465659307	384	Compound
Pi-_PNA-	340	456	74.56140350877193	B10	10	B	W0002541	3.0069687505398854	2.9808759465659307	384	Compound
Pi+_PNA-	66	380	17.36842105263158	B11	11	B	W0002541	3.0069687505398854	2.9808759465659307	384	Compound
Pi+_PNA+	40	380	10.526315789473683	B11	11	B	W0002541	3.0069687505398854	2.9808759465659307	384	Compound
Pi-_PNA+	1	380	0.2631578947368421	B11	11	B	W0002541	3.0069687505398854	2.9808759465659307	384	Compound
Pi-_PNA-	273	380	71.84210526315789	B11	11	B	W0002541	3.0069687505398854	2.9808759465659307	384	Compound
Pi+_PNA-	76	404	18.81188118811881	B12	12	B	W0002541	3.0069687505398854	2.9808759465659307	384	Compound
Pi+_PNA+	28	404	6.9306930693069315	B12	12	B	W0002541	3.0069687505398854	2.9808759465659307	384	Compound
Pi-_PNA+	2	404	0.49504950495049505	B12	12	B	W0002541	3.0069687505398854	2.9808759465659307	384	Compound
Pi-_PNA-	298	404	73.76237623762376	B12	12	B	W0002541	3.0069687505398854	2.9808759465659307	384	Compound
Pi+_PNA-	103	441	23.356009070294785	B13	13	B	W0002541	3.0069687505398854	2.9808759465659307	384	Compound
Pi+_PNA+	3	441	0.6802721088435374	B13	13	B	W0002541	3.0069687505398854	2.9808759465659307	384	Compound
Pi-_PNA+	0	441	0	B13	13	B	W0002541	3.0069687505398854	2.9808759465659307	384	Compound
Pi-_PNA-	335	441	75.96371882086169	B13	13	B	W0002541	3.0069687505398854	2.9808759465659307	384	Compound
Pi+_PNA-	59	296	19.93243243243243	B14	14	B	W0002541	3.0069687505398854	2.9808759465659307	384	Compound
Pi+_PNA+	25	296	8.445945945945946	B14	14	B	W0002541	3.0069687505398854	2.9808759465659307	384	Compound
Pi-_PNA+	2	296	0.6756756756756757	B14	14	B	W0002541	3.0069687505398854	2.9808759465659307	384	Compound
Pi-_PNA-	210	296	70.94594594594594	B14	14	B	W0002541	3.0069687505398854	2.9808759465659307	384	Compound
Pi+_PNA-	102	515	19.80582524271845	B15	15	B	W0002541	3.0069687505398854	2.9808759465659307	384	Compound
Pi+_PNA+	39	515	7.572815533980583	B15	15	B	W0002541	3.0069687505398854	2.9808759465659307	384	Compound
Pi-_PNA+	1	515	0.1941747572815534	B15	15	B	W0002541	3.0069687505398854	2.9808759465659307	384	Compound
Pi-_PNA-	373	515	72.42718446601941	B15	15	B	W0002541	3.0069687505398854	2.9808759465659307	384	Compound
Pi+_PNA-	119	489	24.335378323108383	B16	16	B	W0002541	3.0069687505398854	2.9808759465659307	384	Compound
Pi+_PNA+	36	489	7.361963190184049	B16	16	B	W0002541	3.0069687505398854	2.9808759465659307	384	Compound
Pi-_PNA+	1	489	0.2044989775051125	B16	16	B	W0002541	3.0069687505398854	2.9808759465659307	384	Compound
Pi-_PNA-	333	489	68.09815950920245	B16	16	B	W0002541	3.0069687505398854	2.9808759465659307	384	Compound
Pi+_PNA-	109	497	21.93158953722334	B17	17	B	W0002541	3.0069687505398854	2.9808759465659307	384	Compound
Pi+_PNA+	40	497	8.048289738430583	B17	17	B	W0002541	3.0069687505398854	2.9808759465659307	384	Compound
Pi-_PNA+	3	497	0.6036217303822937	B17	17	B	W0002541	3.0069687505398854	2.9808759465659307	384	Compound
Pi-_PNA-	345	497	69.41649899396378	B17	17	B	W0002541	3.0069687505398854	2.9808759465659307	384	Compound
Pi+_PNA-	99	424	23.349056603773587	B18	18	B	W0002541	3.0069687505398854	2.9808759465659307	384	Compound
Pi+_PNA+	46	424	10.849056603773585	B18	18	B	W0002541	3.0069687505398854	2.9808759465659307	384	Compound
Pi-_PNA+	2	424	0.4716981132075472	B18	18	B	W0002541	3.0069687505398854	2.9808759465659307	384	Compound
Pi-_PNA-	277	424	65.33018867924528	B18	18	B	W0002541	3.0069687505398854	2.9808759465659307	384	Compound
Pi+_PNA-	102	443	23.024830699774267	B19	19	B	W0002541	3.0069687505398854	2.9808759465659307	384	Compound
Pi+_PNA+	41	443	9.255079006772009	B19	19	B	W0002541	3.0069687505398854	2.9808759465659307	384	Compound
Pi-_PNA+	0	443	0	B19	19	B	W0002541	3.0069687505398854	2.9808759465659307	384	Compound
Pi-_PNA-	300	443	67.72009029345372	B19	19	B	W0002541	3.0069687505398854	2.9808759465659307	384	Compound
Pi+_PNA-	91	442	20.588235294117645	B20	20	B	W0002541	3.0069687505398854	2.9808759465659307	384	Compound
Pi+_PNA+	34	442	7.6923076923076925	B20	20	B	W0002541	3.0069687505398854	2.9808759465659307	384	Compound
Pi-_PNA+	3	442	0.6787330316742082	B20	20	B	W0002541	3.0069687505398854	2.9808759465659307	384	Compound
Pi-_PNA-	314	442	71.04072398190046	B20	20	B	W0002541	3.0069687505398854	2.9808759465659307	384	Compound
Pi+_PNA-	86	422	20.379146919431278	B21	21	B	W0002541	3.0069687505398854	2.9808759465659307	384	Compound
Pi+_PNA+	29	422	6.872037914691943	B21	21	B	W0002541	3.0069687505398854	2.9808759465659307	384	Compound
Pi-_PNA+	2	422	0.47393364928909953	B21	21	B	W0002541	3.0069687505398854	2.9808759465659307	384	Compound
Pi-_PNA-	305	422	72.27488151658767	B21	21	B	W0002541	3.0069687505398854	2.9808759465659307	384	Compound
Pi+_PNA-	87	433	20.092378752886837	B22	22	B	W0002541	3.0069687505398854	2.9808759465659307	384	Compound
Pi+_PNA+	41	433	9.468822170900692	B22	22	B	W0002541	3.0069687505398854	2.9808759465659307	384	Compound
Pi-_PNA+	0	433	0	B22	22	B	W0002541	3.0069687505398854	2.9808759465659307	384	Compound
Pi-_PNA-	305	433	70.43879907621246	B22	22	B	W0002541	3.0069687505398854	2.9808759465659307	384	Compound
Pi+_PNA-	95	436	21.788990825688074	B23	23	B	W0002541	3.0069687505398854	2.9808759465659307	384	Negative Control
Pi+_PNA+	24	436	5.5045871559633035	B23	23	B	W0002541	3.0069687505398854	2.9808759465659307	384	Negative Control
Pi-_PNA+	10	436	2.293577981651376	B23	23	B	W0002541	3.0069687505398854	2.9808759465659307	384	Negative Control
Pi-_PNA-	307	436	70.41284403669725	B23	23	B	W0002541	3.0069687505398854	2.9808759465659307	384	Negative Control
Pi+_PNA-	106	510	20.784313725490197	B24	24	B	W0002541	3.0069687505398854	2.9808759465659307	384	Positive Control
Pi+_PNA+	42	510	8.235294117647058	B24	24	B	W0002541	3.0069687505398854	2.9808759465659307	384	Positive Control
Pi-_PNA+	10	510	1.9607843137254901	B24	24	B	W0002541	3.0069687505398854	2.9808759465659307	384	Positive Control
Pi-_PNA-	352	510	69.01960784313725	B24	24	B	W0002541	3.0069687505398854	2.9808759465659307	384	Positive Control
Pi+_PNA-	177	616	28.733766233766232	C01	01	C	W0002541	3.0069687505398854	2.9808759465659307	384	Compound
Pi+_PNA+	56	616	9.090909090909092	C01	01	C	W0002541	3.0069687505398854	2.9808759465659307	384	Compound
Pi-_PNA+	1	616	0.16233766233766234	C01	01	C	W0002541	3.0069687505398854	2.9808759465659307	384	Compound
Pi-_PNA-	382	616	62.01298701298701	C01	01	C	W0002541	3.0069687505398854	2.9808759465659307	384	Compound
Pi+_PNA-	172	524	32.82442748091603	C02	02	C	W0002541	3.0069687505398854	2.9808759465659307	384	Compound
Pi+_PNA+	68	524	12.977099236641221	C02	02	C	W0002541	3.0069687505398854	2.9808759465659307	384	Compound
Pi-_PNA+	1	524	0.19083969465648853	C02	02	C	W0002541	3.0069687505398854	2.9808759465659307	384	Compound
Pi-_PNA-	283	524	54.007633587786266	C02	02	C	W0002541	3.0069687505398854	2.9808759465659307	384	Compound
Pi+_PNA-	227	562	40.39145907473309	C03	03	C	W0002541	3.0069687505398854	2.9808759465659307	384	Compound
Pi+_PNA+	54	562	9.608540925266903	C03	03	C	W0002541	3.0069687505398854	2.9808759465659307	384	Compound
Pi-_PNA+	0	562	0	C03	03	C	W0002541	3.0069687505398854	2.9808759465659307	384	Compound
Pi-_PNA-	281	562	50	C03	03	C	W0002541	3.0069687505398854	2.9808759465659307	384	Compound
Pi+_PNA-	198	492	40.243902439024396	C04	04	C	W0002541	3.0069687505398854	2.9808759465659307	384	Compound
Pi+_PNA+	71	492	14.43089430894309	C04	04	C	W0002541	3.0069687505398854	2.9808759465659307	384	Compound
Pi-_PNA+	1	492	0.20325203252032523	C04	04	C	W0002541	3.0069687505398854	2.9808759465659307	384	Compound
Pi-_PNA-	222	492	45.1219512195122	C04	04	C	W0002541	3.0069687505398854	2.9808759465659307	384	Compound
Pi+_PNA-	150	481	31.185031185031185	C05	05	C	W0002541	3.0069687505398854	2.9808759465659307	384	Compound
Pi+_PNA+	68	481	14.137214137214137	C05	05	C	W0002541	3.0069687505398854	2.9808759465659307	384	Compound
Pi-_PNA+	7	481	1.4553014553014554	C05	05	C	W0002541	3.0069687505398854	2.9808759465659307	384	Compound
Pi-_PNA-	256	481	53.222453222453225	C05	05	C	W0002541	3.0069687505398854	2.9808759465659307	384	Compound
Pi+_PNA-	200	700	28.57142857142857	C06	06	C	W0002541	3.0069687505398854	2.9808759465659307	384	Compound
Pi+_PNA+	97	700	13.857142857142858	C06	06	C	W0002541	3.0069687505398854	2.9808759465659307	384	Compound
Pi-_PNA+	2	700	0.2857142857142857	C06	06	C	W0002541	3.0069687505398854	2.9808759465659307	384	Compound
Pi-_PNA-	401	700	57.285714285714285	C06	06	C	W0002541	3.0069687505398854	2.9808759465659307	384	Compound
Pi+_PNA-	137	528	25.946969696969695	C07	07	C	W0002541	3.0069687505398854	2.9808759465659307	384	Compound
Pi+_PNA+	81	528	15.340909090909092	C07	07	C	W0002541	3.0069687505398854	2.9808759465659307	384	Compound
Pi-_PNA+	5	528	0.946969696969697	C07	07	C	W0002541	3.0069687505398854	2.9808759465659307	384	Compound
Pi-_PNA-	305	528	57.765151515151516	C07	07	C	W0002541	3.0069687505398854	2.9808759465659307	384	Compound
Pi+_PNA-	129	456	28.289473684210524	C08	08	C	W0002541	3.0069687505398854	2.9808759465659307	384	Compound
Pi+_PNA+	71	456	15.570175438596493	C08	08	C	W0002541	3.0069687505398854	2.9808759465659307	384	Compound
Pi-_PNA+	3	456	0.6578947368421052	C08	08	C	W0002541	3.0069687505398854	2.9808759465659307	384	Compound
Pi-_PNA-	253	456	55.48245614035088	C08	08	C	W0002541	3.0069687505398854	2.9808759465659307	384	Compound
Pi+_PNA-	152	500	30.4	C09	09	C	W0002541	3.0069687505398854	2.9808759465659307	384	Compound
Pi+_PNA+	66	500	13.200000000000001	C09	09	C	W0002541	3.0069687505398854	2.9808759465659307	384	Compound
Pi-_PNA+	1	500	0.2	C09	09	C	W0002541	3.0069687505398854	2.9808759465659307	384	Compound
Pi-_PNA-	281	500	56.2	C09	09	C	W0002541	3.0069687505398854	2.9808759465659307	384	Compound
Pi+_PNA-	122	392	31.122448979591837	C10	10	C	W0002541	3.0069687505398854	2.9808759465659307	384	Compound
Pi+_PNA+	34	392	8.673469387755102	C10	10	C	W0002541	3.0069687505398854	2.9808759465659307	384	Compound
Pi-_PNA+	0	392	0	C10	10	C	W0002541	3.0069687505398854	2.9808759465659307	384	Compound
Pi-_PNA-	236	392	60.204081632653065	C10	10	C	W0002541	3.0069687505398854	2.9808759465659307	384	Compound
Pi+_PNA-	154	415	37.10843373493976	C11	11	C	W0002541	3.0069687505398854	2.9808759465659307	384	Compound
Pi+_PNA+	48	415	11.566265060240964	C11	11	C	W0002541	3.0069687505398854	2.9808759465659307	384	Compound
Pi-_PNA+	2	415	0.48192771084337355	C11	11	C	W0002541	3.0069687505398854	2.9808759465659307	384	Compound
Pi-_PNA-	211	415	50.84337349397591	C11	11	C	W0002541	3.0069687505398854	2.9808759465659307	384	Compound
Pi+_PNA-	141	523	26.95984703632887	C12	12	C	W0002541	3.0069687505398854	2.9808759465659307	384	Compound
Pi+_PNA+	60	523	11.47227533460803	C12	12	C	W0002541	3.0069687505398854	2.9808759465659307	384	Compound
Pi-_PNA+	4	523	0.7648183556405354	C12	12	C	W0002541	3.0069687505398854	2.9808759465659307	384	Compound
Pi-_PNA-	318	523	60.80305927342257	C12	12	C	W0002541	3.0069687505398854	2.9808759465659307	384	Compound
Pi+_PNA-	136	473	28.752642706131077	C13	13	C	W0002541	3.0069687505398854	2.9808759465659307	384	Compound
Pi+_PNA+	54	473	11.416490486257928	C13	13	C	W0002541	3.0069687505398854	2.9808759465659307	384	Compound
Pi-_PNA+	0	473	0	C13	13	C	W0002541	3.0069687505398854	2.9808759465659307	384	Compound
Pi-_PNA-	283	473	59.830866807610995	C13	13	C	W0002541	3.0069687505398854	2.9808759465659307	384	Compound
Pi+_PNA-	96	436	22.018348623853214	C14	14	C	W0002541	3.0069687505398854	2.9808759465659307	384	Compound
Pi+_PNA+	71	436	16.28440366972477	C14	14	C	W0002541	3.0069687505398854	2.9808759465659307	384	Compound
Pi-_PNA+	4	436	0.9174311926605505	C14	14	C	W0002541	3.0069687505398854	2.9808759465659307	384	Compound
Pi-_PNA-	265	436	60.77981651376147	C14	14	C	W0002541	3.0069687505398854	2.9808759465659307	384	Compound
Pi+_PNA-	144	528	27.27272727272727	C15	15	C	W0002541	3.0069687505398854	2.9808759465659307	384	Compound
Pi+_PNA+	57	528	10.795454545454545	C15	15	C	W0002541	3.0069687505398854	2.9808759465659307	384	Compound
Pi-_PNA+	5	528	0.946969696969697	C15	15	C	W0002541	3.0069687505398854	2.9808759465659307	384	Compound
Pi-_PNA-	322	528	60.984848484848484	C15	15	C	W0002541	3.0069687505398854	2.9808759465659307	384	Compound
Pi+_PNA-	70	550	12.727272727272727	C16	16	C	W0002541	3.0069687505398854	2.9808759465659307	384	Compound
Pi+_PNA+	159	550	28.909090909090907	C16	16	C	W0002541	3.0069687505398854	2.9808759465659307	384	Compound
Pi-_PNA+	108	550	19.636363636363637	C16	16	C	W0002541	3.0069687505398854	2.9808759465659307	384	Compound
Pi-_PNA-	213	550	38.72727272727273	C16	16	C	W0002541	3.0069687505398854	2.9808759465659307	384	Compound
Pi+_PNA-	111	396	28.030303030303028	C17	17	C	W0002541	3.0069687505398854	2.9808759465659307	384	Compound
Pi+_PNA+	45	396	11.363636363636363	C17	17	C	W0002541	3.0069687505398854	2.9808759465659307	384	Compound
Pi-_PNA+	3	396	0.7575757575757576	C17	17	C	W0002541	3.0069687505398854	2.9808759465659307	384	Compound
Pi-_PNA-	237	396	59.84848484848485	C17	17	C	W0002541	3.0069687505398854	2.9808759465659307	384	Compound
Pi+_PNA-	170	504	33.730158730158735	C18	18	C	W0002541	3.0069687505398854	2.9808759465659307	384	Compound
Pi+_PNA+	65	504	12.896825396825399	C18	18	C	W0002541	3.0069687505398854	2.9808759465659307	384	Compound
Pi-_PNA+	4	504	0.7936507936507936	C18	18	C	W0002541	3.0069687505398854	2.9808759465659307	384	Compound
Pi-_PNA-	265	504	52.57936507936508	C18	18	C	W0002541	3.0069687505398854	2.9808759465659307	384	Compound
Pi+_PNA-	135	671	20.119225037257824	C19	19	C	W0002541	3.0069687505398854	2.9808759465659307	384	Compound
Pi+_PNA+	78	671	11.624441132637854	C19	19	C	W0002541	3.0069687505398854	2.9808759465659307	384	Compound
Pi-_PNA+	1	671	0.14903129657228018	C19	19	C	W0002541	3.0069687505398854	2.9808759465659307	384	Compound
Pi-_PNA-	457	671	68.10730253353205	C19	19	C	W0002541	3.0069687505398854	2.9808759465659307	384	Compound
Pi+_PNA-	103	328	31.402439024390244	C20	20	C	W0002541	3.0069687505398854	2.9808759465659307	384	Compound
Pi+_PNA+	43	328	13.109756097560975	C20	20	C	W0002541	3.0069687505398854	2.9808759465659307	384	Compound
Pi-_PNA+	4	328	1.2195121951219512	C20	20	C	W0002541	3.0069687505398854	2.9808759465659307	384	Compound
Pi-_PNA-	178	328	54.268292682926834	C20	20	C	W0002541	3.0069687505398854	2.9808759465659307	384	Compound
Pi+_PNA-	122	407	29.975429975429975	C21	21	C	W0002541	3.0069687505398854	2.9808759465659307	384	Compound
Pi+_PNA+	43	407	10.565110565110565	C21	21	C	W0002541	3.0069687505398854	2.9808759465659307	384	Compound
Pi-_PNA+	0	407	0	C21	21	C	W0002541	3.0069687505398854	2.9808759465659307	384	Compound
Pi-_PNA-	242	407	59.45945945945946	C21	21	C	W0002541	3.0069687505398854	2.9808759465659307	384	Compound
Pi+_PNA-	97	325	29.846153846153843	C22	22	C	W0002541	3.0069687505398854	2.9808759465659307	384	Compound
Pi+_PNA+	32	325	9.846153846153847	C22	22	C	W0002541	3.0069687505398854	2.9808759465659307	384	Compound
Pi-_PNA+	1	325	0.3076923076923077	C22	22	C	W0002541	3.0069687505398854	2.9808759465659307	384	Compound
Pi-_PNA-	195	325	60	C22	22	C	W0002541	3.0069687505398854	2.9808759465659307	384	Compound
Pi+_PNA-	122	470	25.957446808510635	C23	23	C	W0002541	3.0069687505398854	2.9808759465659307	384	Negative Control
Pi+_PNA+	48	470	10.212765957446807	C23	23	C	W0002541	3.0069687505398854	2.9808759465659307	384	Negative Control
Pi-_PNA+	3	470	0.6382978723404255	C23	23	C	W0002541	3.0069687505398854	2.9808759465659307	384	Negative Control
Pi-_PNA-	297	470	63.191489361702125	C23	23	C	W0002541	3.0069687505398854	2.9808759465659307	384	Negative Control
Pi+_PNA-	124	445	27.86516853932584	C24	24	C	W0002541	3.0069687505398854	2.9808759465659307	384	Positive Control
Pi+_PNA+	45	445	10.112359550561797	C24	24	C	W0002541	3.0069687505398854	2.9808759465659307	384	Positive Control
Pi-_PNA+	5	445	1.1235955056179776	C24	24	C	W0002541	3.0069687505398854	2.9808759465659307	384	Positive Control
Pi-_PNA-	271	445	60.89887640449439	C24	24	C	W0002541	3.0069687505398854	2.9808759465659307	384	Positive Control
Pi+_PNA-	155	548	28.284671532846716	D01	01	D	W0002541	3.0069687505398854	2.9808759465659307	384	Compound
Pi+_PNA+	66	548	12.043795620437956	D01	01	D	W0002541	3.0069687505398854	2.9808759465659307	384	Compound
Pi-_PNA+	2	548	0.36496350364963503	D01	01	D	W0002541	3.0069687505398854	2.9808759465659307	384	Compound
Pi-_PNA-	325	548	59.306569343065696	D01	01	D	W0002541	3.0069687505398854	2.9808759465659307	384	Compound
Pi+_PNA-	172	520	33.07692307692307	D02	02	D	W0002541	3.0069687505398854	2.9808759465659307	384	Compound
Pi+_PNA+	54	520	10.384615384615385	D02	02	D	W0002541	3.0069687505398854	2.9808759465659307	384	Compound
Pi-_PNA+	3	520	0.576923076923077	D02	02	D	W0002541	3.0069687505398854	2.9808759465659307	384	Compound
Pi-_PNA-	291	520	55.96153846153846	D02	02	D	W0002541	3.0069687505398854	2.9808759465659307	384	Compound
Pi+_PNA-	138	473	29.175475687103592	D03	03	D	W0002541	3.0069687505398854	2.9808759465659307	384	Compound
Pi+_PNA+	59	473	12.473572938689218	D03	03	D	W0002541	3.0069687505398854	2.9808759465659307	384	Compound
Pi-_PNA+	2	473	0.42283298097251587	D03	03	D	W0002541	3.0069687505398854	2.9808759465659307	384	Compound
Pi-_PNA-	274	473	57.928118393234676	D03	03	D	W0002541	3.0069687505398854	2.9808759465659307	384	Compound
Pi+_PNA-	184	471	39.06581740976646	D04	04	D	W0002541	3.0069687505398854	2.9808759465659307	384	Compound
Pi+_PNA+	80	471	16.985138004246284	D04	04	D	W0002541	3.0069687505398854	2.9808759465659307	384	Compound
Pi-_PNA+	2	471	0.42462845010615713	D04	04	D	W0002541	3.0069687505398854	2.9808759465659307	384	Compound
Pi-_PNA-	205	471	43.524416135881104	D04	04	D	W0002541	3.0069687505398854	2.9808759465659307	384	Compound
Pi+_PNA-	159	509	31.237721021611005	D05	05	D	W0002541	3.0069687505398854	2.9808759465659307	384	Compound
Pi+_PNA+	83	509	16.30648330058939	D05	05	D	W0002541	3.0069687505398854	2.9808759465659307	384	Compound
Pi-_PNA+	2	509	0.3929273084479371	D05	05	D	W0002541	3.0069687505398854	2.9808759465659307	384	Compound
Pi-_PNA-	265	509	52.06286836935167	D05	05	D	W0002541	3.0069687505398854	2.9808759465659307	384	Compound
Pi+_PNA-	119	490	24.285714285714285	D06	06	D	W0002541	3.0069687505398854	2.9808759465659307	384	Compound
Pi+_PNA+	79	490	16.122448979591837	D06	06	D	W0002541	3.0069687505398854	2.9808759465659307	384	Compound
Pi-_PNA+	10	490	2.0408163265306123	D06	06	D	W0002541	3.0069687505398854	2.9808759465659307	384	Compound
Pi-_PNA-	282	490	57.55102040816327	D06	06	D	W0002541	3.0069687505398854	2.9808759465659307	384	Compound
Pi+_PNA-	162	535	30.2803738317757	D07	07	D	W0002541	3.0069687505398854	2.9808759465659307	384	Compound
Pi+_PNA+	81	535	15.14018691588785	D07	07	D	W0002541	3.0069687505398854	2.9808759465659307	384	Compound
Pi-_PNA+	2	535	0.3738317757009346	D07	07	D	W0002541	3.0069687505398854	2.9808759465659307	384	Compound
Pi-_PNA-	290	535	54.20560747663551	D07	07	D	W0002541	3.0069687505398854	2.9808759465659307	384	Compound
Pi+_PNA-	113	405	27.901234567901234	D08	08	D	W0002541	3.0069687505398854	2.9808759465659307	384	Compound
Pi+_PNA+	45	405	11.11111111111111	D08	08	D	W0002541	3.0069687505398854	2.9808759465659307	384	Compound
Pi-_PNA+	3	405	0.7407407407407408	D08	08	D	W0002541	3.0069687505398854	2.9808759465659307	384	Compound
Pi-_PNA-	244	405	60.24691358024692	D08	08	D	W0002541	3.0069687505398854	2.9808759465659307	384	Compound
Pi+_PNA-	137	412	33.25242718446602	D09	09	D	W0002541	3.0069687505398854	2.9808759465659307	384	Compound
Pi+_PNA+	62	412	15.048543689320388	D09	09	D	W0002541	3.0069687505398854	2.9808759465659307	384	Compound
Pi-_PNA+	3	412	0.7281553398058253	D09	09	D	W0002541	3.0069687505398854	2.9808759465659307	384	Compound
Pi-_PNA-	210	412	50.970873786407765	D09	09	D	W0002541	3.0069687505398854	2.9808759465659307	384	Compound
Pi+_PNA-	130	406	32.01970443349754	D10	10	D	W0002541	3.0069687505398854	2.9808759465659307	384	Compound
Pi+_PNA+	63	406	15.517241379310345	D10	10	D	W0002541	3.0069687505398854	2.9808759465659307	384	Compound
Pi-_PNA+	1	406	0.24630541871921183	D10	10	D	W0002541	3.0069687505398854	2.9808759465659307	384	Compound
Pi-_PNA-	212	406	52.21674876847291	D10	10	D	W0002541	3.0069687505398854	2.9808759465659307	384	Compound
Pi+_PNA-	104	393	26.463104325699742	D11	11	D	W0002541	3.0069687505398854	2.9808759465659307	384	Compound
Pi+_PNA+	40	393	10.178117048346055	D11	11	D	W0002541	3.0069687505398854	2.9808759465659307	384	Compound
Pi-_PNA+	4	393	1.0178117048346056	D11	11	D	W0002541	3.0069687505398854	2.9808759465659307	384	Compound
Pi-_PNA-	245	393	62.34096692111959	D11	11	D	W0002541	3.0069687505398854	2.9808759465659307	384	Compound
Pi+_PNA-	159	556	28.597122302158272	D12	12	D	W0002541	3.0069687505398854	2.9808759465659307	384	Compound
Pi+_PNA+	54	556	9.712230215827338	D12	12	D	W0002541	3.0069687505398854	2.9808759465659307	384	Compound
Pi-_PNA+	0	556	0	D12	12	D	W0002541	3.0069687505398854	2.9808759465659307	384	Compound
Pi-_PNA-	343	556	61.69064748201439	D12	12	D	W0002541	3.0069687505398854	2.9808759465659307	384	Compound
Pi+_PNA-	129	468	27.564102564102566	D13	13	D	W0002541	3.0069687505398854	2.9808759465659307	384	Compound
Pi+_PNA+	66	468	14.102564102564102	D13	13	D	W0002541	3.0069687505398854	2.9808759465659307	384	Compound
Pi-_PNA+	1	468	0.2136752136752137	D13	13	D	W0002541	3.0069687505398854	2.9808759465659307	384	Compound
Pi-_PNA-	272	468	58.119658119658126	D13	13	D	W0002541	3.0069687505398854	2.9808759465659307	384	Compound
Pi+_PNA-	93	387	24.031007751937985	D14	14	D	W0002541	3.0069687505398854	2.9808759465659307	384	Compound
Pi+_PNA+	43	387	11.11111111111111	D14	14	D	W0002541	3.0069687505398854	2.9808759465659307	384	Compound
Pi-_PNA+	5	387	1.2919896640826873	D14	14	D	W0002541	3.0069687505398854	2.9808759465659307	384	Compound
Pi-_PNA-	246	387	63.565891472868216	D14	14	D	W0002541	3.0069687505398854	2.9808759465659307	384	Compound
Pi+_PNA-	142	525	27.047619047619047	D15	15	D	W0002541	3.0069687505398854	2.9808759465659307	384	Compound
Pi+_PNA+	56	525	10.666666666666668	D15	15	D	W0002541	3.0069687505398854	2.9808759465659307	384	Compound
Pi-_PNA+	3	525	0.5714285714285714	D15	15	D	W0002541	3.0069687505398854	2.9808759465659307	384	Compound
Pi-_PNA-	324	525	61.71428571428571	D15	15	D	W0002541	3.0069687505398854	2.9808759465659307	384	Compound
Pi+_PNA-	134	439	30.52391799544419	D16	16	D	W0002541	3.0069687505398854	2.9808759465659307	384	Compound
Pi+_PNA+	46	439	10.478359908883828	D16	16	D	W0002541	3.0069687505398854	2.9808759465659307	384	Compound
Pi-_PNA+	5	439	1.1389521640091116	D16	16	D	W0002541	3.0069687505398854	2.9808759465659307	384	Compound
Pi-_PNA-	254	439	57.85876993166287	D16	16	D	W0002541	3.0069687505398854	2.9808759465659307	384	Compound
Pi+_PNA-	141	484	29.132231404958674	D17	17	D	W0002541	3.0069687505398854	2.9808759465659307	384	Compound
Pi+_PNA+	70	484	14.46280991735537	D17	17	D	W0002541	3.0069687505398854	2.9808759465659307	384	Compound
Pi-_PNA+	2	484	0.4132231404958678	D17	17	D	W0002541	3.0069687505398854	2.9808759465659307	384	Compound
Pi-_PNA-	271	484	55.99173553719008	D17	17	D	W0002541	3.0069687505398854	2.9808759465659307	384	Compound
Pi+_PNA-	135	454	29.735682819383257	D18	18	D	W0002541	3.0069687505398854	2.9808759465659307	384	Compound
Pi+_PNA+	50	454	11.013215859030836	D18	18	D	W0002541	3.0069687505398854	2.9808759465659307	384	Compound
Pi-_PNA+	2	454	0.4405286343612335	D18	18	D	W0002541	3.0069687505398854	2.9808759465659307	384	Compound
Pi-_PNA-	267	454	58.81057268722467	D18	18	D	W0002541	3.0069687505398854	2.9808759465659307	384	Compound
Pi+_PNA-	109	350	31.142857142857146	D19	19	D	W0002541	3.0069687505398854	2.9808759465659307	384	Compound
Pi+_PNA+	31	350	8.857142857142856	D19	19	D	W0002541	3.0069687505398854	2.9808759465659307	384	Compound
Pi-_PNA+	0	350	0	D19	19	D	W0002541	3.0069687505398854	2.9808759465659307	384	Compound
Pi-_PNA-	210	350	60	D19	19	D	W0002541	3.0069687505398854	2.9808759465659307	384	Compound
Pi+_PNA-	134	429	31.23543123543124	D20	20	D	W0002541	3.0069687505398854	2.9808759465659307	384	Compound
Pi+_PNA+	47	429	10.955710955710956	D20	20	D	W0002541	3.0069687505398854	2.9808759465659307	384	Compound
Pi-_PNA+	3	429	0.6993006993006993	D20	20	D	W0002541	3.0069687505398854	2.9808759465659307	384	Compound
Pi-_PNA-	245	429	57.10955710955711	D20	20	D	W0002541	3.0069687505398854	2.9808759465659307	384	Compound
Pi+_PNA-	118	411	28.710462287104622	D21	21	D	W0002541	3.0069687505398854	2.9808759465659307	384	Compound
Pi+_PNA+	40	411	9.732360097323602	D21	21	D	W0002541	3.0069687505398854	2.9808759465659307	384	Compound
Pi-_PNA+	3	411	0.7299270072992701	D21	21	D	W0002541	3.0069687505398854	2.9808759465659307	384	Compound
Pi-_PNA-	250	411	60.82725060827251	D21	21	D	W0002541	3.0069687505398854	2.9808759465659307	384	Compound
Pi+_PNA-	122	434	28.110599078341014	D22	22	D	W0002541	3.0069687505398854	2.9808759465659307	384	Compound
Pi+_PNA+	53	434	12.211981566820276	D22	22	D	W0002541	3.0069687505398854	2.9808759465659307	384	Compound
Pi-_PNA+	2	434	0.4608294930875576	D22	22	D	W0002541	3.0069687505398854	2.9808759465659307	384	Compound
Pi-_PNA-	257	434	59.21658986175116	D22	22	D	W0002541	3.0069687505398854	2.9808759465659307	384	Compound
Pi+_PNA-	120	513	23.391812865497073	D23	23	D	W0002541	3.0069687505398854	2.9808759465659307	384	Negative Control
Pi+_PNA+	21	513	4.093567251461988	D23	23	D	W0002541	3.0069687505398854	2.9808759465659307	384	Negative Control
Pi-_PNA+	11	513	2.144249512670565	D23	23	D	W0002541	3.0069687505398854	2.9808759465659307	384	Negative Control
Pi-_PNA-	361	513	70.37037037037037	D23	23	D	W0002541	3.0069687505398854	2.9808759465659307	384	Negative Control
Pi+_PNA-	162	546	29.67032967032967	D24	24	D	W0002541	3.0069687505398854	2.9808759465659307	384	Positive Control
Pi+_PNA+	41	546	7.509157509157509	D24	24	D	W0002541	3.0069687505398854	2.9808759465659307	384	Positive Control
Pi-_PNA+	6	546	1.098901098901099	D24	24	D	W0002541	3.0069687505398854	2.9808759465659307	384	Positive Control
Pi-_PNA-	337	546	61.72161172161172	D24	24	D	W0002541	3.0069687505398854	2.9808759465659307	384	Positive Control
Pi+_PNA-	114	595	19.15966386554622	E01	01	E	W0002541	3.0069687505398854	2.9808759465659307	384	Compound
Pi+_PNA+	64	595	10.756302521008404	E01	01	E	W0002541	3.0069687505398854	2.9808759465659307	384	Compound
Pi-_PNA+	2	595	0.33613445378151263	E01	01	E	W0002541	3.0069687505398854	2.9808759465659307	384	Compound
Pi-_PNA-	415	595	69.74789915966386	E01	01	E	W0002541	3.0069687505398854	2.9808759465659307	384	Compound
Pi+_PNA-	86	479	17.954070981210858	E02	02	E	W0002541	3.0069687505398854	2.9808759465659307	384	Compound
Pi+_PNA+	48	479	10.020876826722338	E02	02	E	W0002541	3.0069687505398854	2.9808759465659307	384	Compound
Pi-_PNA+	3	479	0.6263048016701461	E02	02	E	W0002541	3.0069687505398854	2.9808759465659307	384	Compound
Pi-_PNA-	342	479	71.39874739039665	E02	02	E	W0002541	3.0069687505398854	2.9808759465659307	384	Compound
Pi+_PNA-	75	405	18.51851851851852	E03	03	E	W0002541	3.0069687505398854	2.9808759465659307	384	Compound
Pi+_PNA+	68	405	16.790123456790123	E03	03	E	W0002541	3.0069687505398854	2.9808759465659307	384	Compound
Pi-_PNA+	2	405	0.49382716049382713	E03	03	E	W0002541	3.0069687505398854	2.9808759465659307	384	Compound
Pi-_PNA-	260	405	64.19753086419753	E03	03	E	W0002541	3.0069687505398854	2.9808759465659307	384	Compound
Pi+_PNA-	100	472	21.1864406779661	E04	04	E	W0002541	3.0069687505398854	2.9808759465659307	384	Compound
Pi+_PNA+	65	472	13.771186440677965	E04	04	E	W0002541	3.0069687505398854	2.9808759465659307	384	Compound
Pi-_PNA+	3	472	0.6355932203389831	E04	04	E	W0002541	3.0069687505398854	2.9808759465659307	384	Compound
Pi-_PNA-	304	472	64.40677966101694	E04	04	E	W0002541	3.0069687505398854	2.9808759465659307	384	Compound
Pi+_PNA-	78	427	18.26697892271663	E05	05	E	W0002541	3.0069687505398854	2.9808759465659307	384	Compound
Pi+_PNA+	40	427	9.367681498829041	E05	05	E	W0002541	3.0069687505398854	2.9808759465659307	384	Compound
Pi-_PNA+	1	427	0.234192037470726	E05	05	E	W0002541	3.0069687505398854	2.9808759465659307	384	Compound
Pi-_PNA-	308	427	72.1311475409836	E05	05	E	W0002541	3.0069687505398854	2.9808759465659307	384	Compound
Pi+_PNA-	79	404	19.554455445544555	E06	06	E	W0002541	3.0069687505398854	2.9808759465659307	384	Compound
Pi+_PNA+	26	404	6.435643564356436	E06	06	E	W0002541	3.0069687505398854	2.9808759465659307	384	Compound
Pi-_PNA+	2	404	0.49504950495049505	E06	06	E	W0002541	3.0069687505398854	2.9808759465659307	384	Compound
Pi-_PNA-	297	404	73.51485148514851	E06	06	E	W0002541	3.0069687505398854	2.9808759465659307	384	Compound
Pi+_PNA-	71	378	18.78306878306878	E07	07	E	W0002541	3.0069687505398854	2.9808759465659307	384	Compound
Pi+_PNA+	50	378	13.227513227513226	E07	07	E	W0002541	3.0069687505398854	2.9808759465659307	384	Compound
Pi-_PNA+	3	378	0.7936507936507936	E07	07	E	W0002541	3.0069687505398854	2.9808759465659307	384	Compound
Pi-_PNA-	254	378	67.1957671957672	E07	07	E	W0002541	3.0069687505398854	2.9808759465659307	384	Compound
Pi+_PNA-	88	477	18.448637316561843	E08	08	E	W0002541	3.0069687505398854	2.9808759465659307	384	Compound
Pi+_PNA+	76	477	15.932914046121594	E08	08	E	W0002541	3.0069687505398854	2.9808759465659307	384	Compound
Pi-_PNA+	1	477	0.20964360587002098	E08	08	E	W0002541	3.0069687505398854	2.9808759465659307	384	Compound
Pi-_PNA-	312	477	65.40880503144653	E08	08	E	W0002541	3.0069687505398854	2.9808759465659307	384	Compound
Pi+_PNA-	81	330	24.545454545454547	E09	09	E	W0002541	3.0069687505398854	2.9808759465659307	384	Compound
Pi+_PNA+	37	330	11.212121212121213	E09	09	E	W0002541	3.0069687505398854	2.9808759465659307	384	Compound
Pi-_PNA+	2	330	0.6060606060606061	E09	09	E	W0002541	3.0069687505398854	2.9808759465659307	384	Compound
Pi-_PNA-	210	330	63.63636363636363	E09	09	E	W0002541	3.0069687505398854	2.9808759465659307	384	Compound
Pi+_PNA-	58	645	8.992248062015504	E10	10	E	W0002541	3.0069687505398854	2.9808759465659307	384	Compound
Pi+_PNA+	56	645	8.682170542635658	E10	10	E	W0002541	3.0069687505398854	2.9808759465659307	384	Compound
Pi-_PNA+	3	645	0.46511627906976744	E10	10	E	W0002541	3.0069687505398854	2.9808759465659307	384	Compound
Pi-_PNA-	528	645	81.86046511627907	E10	10	E	W0002541	3.0069687505398854	2.9808759465659307	384	Compound
Pi+_PNA-	62	365	16.986301369863014	E11	11	E	W0002541	3.0069687505398854	2.9808759465659307	384	Compound
Pi+_PNA+	54	365	14.794520547945206	E11	11	E	W0002541	3.0069687505398854	2.9808759465659307	384	Compound
Pi-_PNA+	2	365	0.547945205479452	E11	11	E	W0002541	3.0069687505398854	2.9808759465659307	384	Compound
Pi-_PNA-	247	365	67.67123287671232	E11	11	E	W0002541	3.0069687505398854	2.9808759465659307	384	Compound
Pi+_PNA-	63	396	15.909090909090908	E12	12	E	W0002541	3.0069687505398854	2.9808759465659307	384	Compound
Pi+_PNA+	62	396	15.656565656565657	E12	12	E	W0002541	3.0069687505398854	2.9808759465659307	384	Compound
Pi-_PNA+	7	396	1.7676767676767675	E12	12	E	W0002541	3.0069687505398854	2.9808759465659307	384	Compound
Pi-_PNA-	264	396	66.66666666666666	E12	12	E	W0002541	3.0069687505398854	2.9808759465659307	384	Compound
Pi+_PNA-	89	442	20.13574660633484	E13	13	E	W0002541	3.0069687505398854	2.9808759465659307	384	Compound
Pi+_PNA+	63	442	14.25339366515837	E13	13	E	W0002541	3.0069687505398854	2.9808759465659307	384	Compound
Pi-_PNA+	3	442	0.6787330316742082	E13	13	E	W0002541	3.0069687505398854	2.9808759465659307	384	Compound
Pi-_PNA-	287	442	64.93212669683258	E13	13	E	W0002541	3.0069687505398854	2.9808759465659307	384	Compound
Pi+_PNA-	69	439	15.717539863325742	E14	14	E	W0002541	3.0069687505398854	2.9808759465659307	384	Compound
Pi+_PNA+	52	439	11.845102505694761	E14	14	E	W0002541	3.0069687505398854	2.9808759465659307	384	Compound
Pi-_PNA+	2	439	0.45558086560364464	E14	14	E	W0002541	3.0069687505398854	2.9808759465659307	384	Compound
Pi-_PNA-	316	439	71.98177676537586	E14	14	E	W0002541	3.0069687505398854	2.9808759465659307	384	Compound
Pi+_PNA-	95	449	21.158129175946545	E15	15	E	W0002541	3.0069687505398854	2.9808759465659307	384	Compound
Pi+_PNA+	43	449	9.57683741648107	E15	15	E	W0002541	3.0069687505398854	2.9808759465659307	384	Compound
Pi-_PNA+	1	449	0.22271714922048996	E15	15	E	W0002541	3.0069687505398854	2.9808759465659307	384	Compound
Pi-_PNA-	310	449	69.04231625835189	E15	15	E	W0002541	3.0069687505398854	2.9808759465659307	384	Compound
Pi+_PNA-	62	329	18.84498480243161	E16	16	E	W0002541	3.0069687505398854	2.9808759465659307	384	Compound
Pi+_PNA+	43	329	13.069908814589665	E16	16	E	W0002541	3.0069687505398854	2.9808759465659307	384	Compound
Pi-_PNA+	3	329	0.911854103343465	E16	16	E	W0002541	3.0069687505398854	2.9808759465659307	384	Compound
Pi-_PNA-	221	329	67.17325227963525	E16	16	E	W0002541	3.0069687505398854	2.9808759465659307	384	Compound
Pi+_PNA-	67	435	15.402298850574713	E17	17	E	W0002541	3.0069687505398854	2.9808759465659307	384	Compound
Pi+_PNA+	73	435	16.7816091954023	E17	17	E	W0002541	3.0069687505398854	2.9808759465659307	384	Compound
Pi-_PNA+	3	435	0.6896551724137931	E17	17	E	W0002541	3.0069687505398854	2.9808759465659307	384	Compound
Pi-_PNA-	292	435	67.1264367816092	E17	17	E	W0002541	3.0069687505398854	2.9808759465659307	384	Compound
Pi+_PNA-	90	497	18.10865191146881	E18	18	E	W0002541	3.0069687505398854	2.9808759465659307	384	Compound
Pi+_PNA+	63	497	12.676056338028168	E18	18	E	W0002541	3.0069687505398854	2.9808759465659307	384	Compound
Pi-_PNA+	0	497	0	E18	18	E	W0002541	3.0069687505398854	2.9808759465659307	384	Compound
Pi-_PNA-	344	497	69.21529175050301	E18	18	E	W0002541	3.0069687505398854	2.9808759465659307	384	Compound
Pi+_PNA-	67	438	15.296803652968036	E19	19	E	W0002541	3.0069687505398854	2.9808759465659307	384	Compound
Pi+_PNA+	58	438	13.24200913242009	E19	19	E	W0002541	3.0069687505398854	2.9808759465659307	384	Compound
Pi-_PNA+	0	438	0	E19	19	E	W0002541	3.0069687505398854	2.9808759465659307	384	Compound
Pi-_PNA-	313	438	71.46118721461188	E19	19	E	W0002541	3.0069687505398854	2.9808759465659307	384	Compound
Pi+_PNA-	83	395	21.012658227848103	E20	20	E	W0002541	3.0069687505398854	2.9808759465659307	384	Compound
Pi+_PNA+	39	395	9.873417721518987	E20	20	E	W0002541	3.0069687505398854	2.9808759465659307	384	Compound
Pi-_PNA+	1	395	0.25316455696202533	E20	20	E	W0002541	3.0069687505398854	2.9808759465659307	384	Compound
[truncated: 50,225 more rows]
