# Supplementary material for: A phenotypic screening platform utilising human spermatozoa identifies compounds with contraceptive activity
Source: eLife. 2020 Jan 28;9:e51739. doi: 10.7554/eLife.51739 (PMC7046468; doi:10.7554/eLife.51739)
Supplement: Figure 3—source data 3. [file elife-51739-fig3-data3.csv]

compound_id	datamode	assay	experiment	well_number	conc_uM	x	y	Population	Parent	Count	ParentCount	ratio	neg_med	neg_mad
RFM-011-941-5	Increasing	Male contraceptive screen [Acrosome]	W0002531	K05	9.99	05	K	Pi+_PNA-	root	1	2083	0.04800768122899664	17.094298245614034	2.4547434210526315
RFM-011-941-5	Increasing	Male contraceptive screen [Acrosome]	W0002531	K05	9.99	05	K	Pi+_PNA+	root	2079	2083	99.80796927508402	20.419407894736842	0.15850164473684264
RFM-011-941-5	Increasing	Male contraceptive screen [Acrosome]	W0002531	K05	9.99	05	K	Pi-_PNA+	root	0	2083	0	2.5834116541353387	0.8517286184210525
RFM-011-941-5	Increasing	Male contraceptive screen [Acrosome]	W0002531	K05	9.99	05	K	Pi-_PNA-	root	3	2083	0.14402304368698993	59.90288220551379	1.4445131578947379
RFM-011-941-5	Increasing	Male contraceptive screen [Acrosome]	W0002531	K06	2.5	06	K	Pi+_PNA-	root	432	1564	27.621483375959077	17.094298245614034	2.4547434210526315
RFM-011-941-5	Increasing	Male contraceptive screen [Acrosome]	W0002531	K06	2.5	06	K	Pi+_PNA+	root	1119	1564	71.54731457800511	20.419407894736842	0.15850164473684264
RFM-011-941-5	Increasing	Male contraceptive screen [Acrosome]	W0002531	K06	2.5	06	K	Pi-_PNA+	root	2	1564	0.1278772378516624	2.5834116541353387	0.8517286184210525
RFM-011-941-5	Increasing	Male contraceptive screen [Acrosome]	W0002531	K06	2.5	06	K	Pi-_PNA-	root	11	1564	0.7033248081841432	59.90288220551379	1.4445131578947379
RFM-011-941-5	Increasing	Male contraceptive screen [Acrosome]	W0002531	K07	1.25	07	K	Pi+_PNA-	root	166	365	45.47945205479452	17.094298245614034	2.4547434210526315
RFM-011-941-5	Increasing	Male contraceptive screen [Acrosome]	W0002531	K07	1.25	07	K	Pi+_PNA+	root	78	365	21.36986301369863	20.419407894736842	0.15850164473684264
RFM-011-941-5	Increasing	Male contraceptive screen [Acrosome]	W0002531	K07	1.25	07	K	Pi-_PNA+	root	7	365	1.9178082191780823	2.5834116541353387	0.8517286184210525
RFM-011-941-5	Increasing	Male contraceptive screen [Acrosome]	W0002531	K07	1.25	07	K	Pi-_PNA-	root	114	365	31.232876712328768	59.90288220551379	1.4445131578947379
RFM-011-941-5	Increasing	Male contraceptive screen [Acrosome]	W0002531	K08	0.373	08	K	Pi+_PNA-	root	98	368	26.6304347826087	17.094298245614034	2.4547434210526315
RFM-011-941-5	Increasing	Male contraceptive screen [Acrosome]	W0002531	K08	0.373	08	K	Pi+_PNA+	root	92	368	25	20.419407894736842	0.15850164473684264
RFM-011-941-5	Increasing	Male contraceptive screen [Acrosome]	W0002531	K08	0.373	08	K	Pi-_PNA+	root	12	368	3.260869565217391	2.5834116541353387	0.8517286184210525
RFM-011-941-5	Increasing	Male contraceptive screen [Acrosome]	W0002531	K08	0.373	08	K	Pi-_PNA-	root	166	368	45.108695652173914	59.90288220551379	1.4445131578947379
RFM-011-941-5	Increasing	Male contraceptive screen [Acrosome]	W0002531	K09	0.0932	09	K	Pi+_PNA-	root	96	500	19.2	17.094298245614034	2.4547434210526315
RFM-011-941-5	Increasing	Male contraceptive screen [Acrosome]	W0002531	K09	0.0932	09	K	Pi+_PNA+	root	83	500	16.6	20.419407894736842	0.15850164473684264
RFM-011-941-5	Increasing	Male contraceptive screen [Acrosome]	W0002531	K09	0.0932	09	K	Pi-_PNA+	root	6	500	1.2	2.5834116541353387	0.8517286184210525
RFM-011-941-5	Increasing	Male contraceptive screen [Acrosome]	W0002531	K09	0.0932	09	K	Pi-_PNA-	root	315	500	63	59.90288220551379	1.4445131578947379
RFM-011-941-5	Increasing	Male contraceptive screen [Acrosome]	W0002531	K10	0.0466	10	K	Pi+_PNA-	root	91	617	14.748784440842789	17.094298245614034	2.4547434210526315
RFM-011-941-5	Increasing	Male contraceptive screen [Acrosome]	W0002531	K10	0.0466	10	K	Pi+_PNA+	root	152	617	24.635332252836303	20.419407894736842	0.15850164473684264
RFM-011-941-5	Increasing	Male contraceptive screen [Acrosome]	W0002531	K10	0.0466	10	K	Pi-_PNA+	root	8	617	1.2965964343598055	2.5834116541353387	0.8517286184210525
RFM-011-941-5	Increasing	Male contraceptive screen [Acrosome]	W0002531	K10	0.0466	10	K	Pi-_PNA-	root	366	617	59.3192868719611	59.90288220551379	1.4445131578947379
RFM-011-941-5	Increasing	Male contraceptive screen [Acrosome]	W0002531	K11	0.0139	11	K	Pi+_PNA-	root	61	590	10.338983050847457	17.094298245614034	2.4547434210526315
RFM-011-941-5	Increasing	Male contraceptive screen [Acrosome]	W0002531	K11	0.0139	11	K	Pi+_PNA+	root	114	590	19.322033898305087	20.419407894736842	0.15850164473684264
RFM-011-941-5	Increasing	Male contraceptive screen [Acrosome]	W0002531	K11	0.0139	11	K	Pi-_PNA+	root	9	590	1.5254237288135595	2.5834116541353387	0.8517286184210525
RFM-011-941-5	Increasing	Male contraceptive screen [Acrosome]	W0002531	K11	0.0139	11	K	Pi-_PNA-	root	406	590	68.8135593220339	59.90288220551379	1.4445131578947379
RFM-011-941-5	Increasing	Male contraceptive screen [Acrosome]	W0002531	K12	0.00346	12	K	Pi+_PNA-	root	50	514	9.72762645914397	17.094298245614034	2.4547434210526315
RFM-011-941-5	Increasing	Male contraceptive screen [Acrosome]	W0002531	K12	0.00346	12	K	Pi+_PNA+	root	83	514	16.147859922178988	20.419407894736842	0.15850164473684264
RFM-011-941-5	Increasing	Male contraceptive screen [Acrosome]	W0002531	K12	0.00346	12	K	Pi-_PNA+	root	17	514	3.3073929961089497	2.5834116541353387	0.8517286184210525
RFM-011-941-5	Increasing	Male contraceptive screen [Acrosome]	W0002531	K12	0.00346	12	K	Pi-_PNA-	root	364	514	70.8171206225681	59.90288220551379	1.4445131578947379
RFM-011-941-5	Increasing	Male contraceptive screen [Acrosome]	W0002533	K05	9.99	05	K	Pi+_PNA-	root	1	1855	0.05390835579514825	18.570404505888376	1.504615053763443
RFM-011-941-5	Increasing	Male contraceptive screen [Acrosome]	W0002533	K05	9.99	05	K	Pi+_PNA+	root	1852	1855	99.83827493261455	28.34767025089606	3.7676107526881735
RFM-011-941-5	Increasing	Male contraceptive screen [Acrosome]	W0002533	K05	9.99	05	K	Pi-_PNA+	root	2	1855	0.1078167115902965	1.6912442396313363	0.4577612903225806
RFM-011-941-5	Increasing	Male contraceptive screen [Acrosome]	W0002533	K05	9.99	05	K	Pi-_PNA-	root	0	1855	0	51.39068100358423	2.7207569892473056
RFM-011-941-5	Increasing	Male contraceptive screen [Acrosome]	W0002533	K06	2.5	06	K	Pi+_PNA-	root	92	1993	4.616156547917712	18.570404505888376	1.504615053763443
RFM-011-941-5	Increasing	Male contraceptive screen [Acrosome]	W0002533	K06	2.5	06	K	Pi+_PNA+	root	1889	1993	94.78173607626694	28.34767025089606	3.7676107526881735
RFM-011-941-5	Increasing	Male contraceptive screen [Acrosome]	W0002533	K06	2.5	06	K	Pi-_PNA+	root	3	1993	0.15052684395383845	1.6912442396313363	0.4577612903225806
RFM-011-941-5	Increasing	Male contraceptive screen [Acrosome]	W0002533	K06	2.5	06	K	Pi-_PNA-	root	9	1993	0.45158053186151526	51.39068100358423	2.7207569892473056
RFM-011-941-5	Increasing	Male contraceptive screen [Acrosome]	W0002533	K07	1.25	07	K	Pi+_PNA-	root	172	877	19.61231470923603	18.570404505888376	1.504615053763443
RFM-011-941-5	Increasing	Male contraceptive screen [Acrosome]	W0002533	K07	1.25	07	K	Pi+_PNA+	root	576	877	65.67844925883695	28.34767025089606	3.7676107526881735
RFM-011-941-5	Increasing	Male contraceptive screen [Acrosome]	W0002533	K07	1.25	07	K	Pi-_PNA+	root	25	877	2.8506271379703536	1.6912442396313363	0.4577612903225806
RFM-011-941-5	Increasing	Male contraceptive screen [Acrosome]	W0002533	K07	1.25	07	K	Pi-_PNA-	root	104	877	11.85860889395667	51.39068100358423	2.7207569892473056
RFM-011-941-5	Increasing	Male contraceptive screen [Acrosome]	W0002533	K08	0.373	08	K	Pi+_PNA-	root	37	369	10.02710027100271	18.570404505888376	1.504615053763443
RFM-011-941-5	Increasing	Male contraceptive screen [Acrosome]	W0002533	K08	0.373	08	K	Pi+_PNA+	root	101	369	27.371273712737125	28.34767025089606	3.7676107526881735
RFM-011-941-5	Increasing	Male contraceptive screen [Acrosome]	W0002533	K08	0.373	08	K	Pi-_PNA+	root	12	369	3.2520325203252036	1.6912442396313363	0.4577612903225806
RFM-011-941-5	Increasing	Male contraceptive screen [Acrosome]	W0002533	K08	0.373	08	K	Pi-_PNA-	root	219	369	59.34959349593496	51.39068100358423	2.7207569892473056
RFM-011-941-5	Increasing	Male contraceptive screen [Acrosome]	W0002533	K09	0.0932	09	K	Pi+_PNA-	root	48	583	8.233276157804461	18.570404505888376	1.504615053763443
RFM-011-941-5	Increasing	Male contraceptive screen [Acrosome]	W0002533	K09	0.0932	09	K	Pi+_PNA+	root	128	583	21.955403087478558	28.34767025089606	3.7676107526881735
RFM-011-941-5	Increasing	Male contraceptive screen [Acrosome]	W0002533	K09	0.0932	09	K	Pi-_PNA+	root	11	583	1.8867924528301887	1.6912442396313363	0.4577612903225806
RFM-011-941-5	Increasing	Male contraceptive screen [Acrosome]	W0002533	K09	0.0932	09	K	Pi-_PNA-	root	396	583	67.9245283018868	51.39068100358423	2.7207569892473056
RFM-011-941-5	Increasing	Male contraceptive screen [Acrosome]	W0002533	K10	0.0466	10	K	Pi+_PNA-	root	41	580	7.06896551724138	18.570404505888376	1.504615053763443
RFM-011-941-5	Increasing	Male contraceptive screen [Acrosome]	W0002533	K10	0.0466	10	K	Pi+_PNA+	root	98	580	16.896551724137932	28.34767025089606	3.7676107526881735
RFM-011-941-5	Increasing	Male contraceptive screen [Acrosome]	W0002533	K10	0.0466	10	K	Pi-_PNA+	root	20	580	3.4482758620689653	1.6912442396313363	0.4577612903225806
RFM-011-941-5	Increasing	Male contraceptive screen [Acrosome]	W0002533	K10	0.0466	10	K	Pi-_PNA-	root	421	580	72.58620689655172	51.39068100358423	2.7207569892473056
RFM-011-941-5	Increasing	Male contraceptive screen [Acrosome]	W0002533	K11	0.0139	11	K	Pi+_PNA-	root	38	589	6.451612903225806	18.570404505888376	1.504615053763443
RFM-011-941-5	Increasing	Male contraceptive screen [Acrosome]	W0002533	K11	0.0139	11	K	Pi+_PNA+	root	137	589	23.2597623089983	28.34767025089606	3.7676107526881735
RFM-011-941-5	Increasing	Male contraceptive screen [Acrosome]	W0002533	K11	0.0139	11	K	Pi-_PNA+	root	8	589	1.3582342954159592	1.6912442396313363	0.4577612903225806
RFM-011-941-5	Increasing	Male contraceptive screen [Acrosome]	W0002533	K11	0.0139	11	K	Pi-_PNA-	root	406	589	68.93039049235993	51.39068100358423	2.7207569892473056
RFM-011-941-5	Increasing	Male contraceptive screen [Acrosome]	W0002533	K12	0.00346	12	K	Pi+_PNA-	root	46	463	9.935205183585314	18.570404505888376	1.504615053763443
RFM-011-941-5	Increasing	Male contraceptive screen [Acrosome]	W0002533	K12	0.00346	12	K	Pi+_PNA+	root	120	463	25.917926565874733	28.34767025089606	3.7676107526881735
RFM-011-941-5	Increasing	Male contraceptive screen [Acrosome]	W0002533	K12	0.00346	12	K	Pi-_PNA+	root	11	463	2.375809935205184	1.6912442396313363	0.4577612903225806
RFM-011-941-5	Increasing	Male contraceptive screen [Acrosome]	W0002533	K12	0.00346	12	K	Pi-_PNA-	root	286	463	61.77105831533477	51.39068100358423	2.7207569892473056
RFM-000-968-7	Increasing	Male contraceptive screen [Acrosome]	W0002529	D15	9.99	15	D	Pi+_PNA-	root	42	743	5.652759084791386	15.345281261585482	0.18433462035789397
RFM-000-968-7	Increasing	Male contraceptive screen [Acrosome]	W0002529	D15	9.99	15	D	Pi+_PNA+	root	221	743	29.7442799461642	18.337613368176434	0.25304116067311144
RFM-000-968-7	Increasing	Male contraceptive screen [Acrosome]	W0002529	D15	9.99	15	D	Pi-_PNA+	root	198	743	26.648721399730825	1.8107260084455334	0.22723431382300552
RFM-000-968-7	Increasing	Male contraceptive screen [Acrosome]	W0002529	D15	9.99	15	D	Pi-_PNA-	root	282	743	37.95423956931359	64.50637936179254	0.21014146720799776
RFM-000-968-7	Increasing	Male contraceptive screen [Acrosome]	W0002529	D16	2.5	16	D	Pi+_PNA-	root	84	584	14.383561643835616	15.345281261585482	0.18433462035789397
RFM-000-968-7	Increasing	Male contraceptive screen [Acrosome]	W0002529	D16	2.5	16	D	Pi+_PNA+	root	169	584	28.93835616438356	18.337613368176434	0.25304116067311144
RFM-000-968-7	Increasing	Male contraceptive screen [Acrosome]	W0002529	D16	2.5	16	D	Pi-_PNA+	root	20	584	3.4246575342465753	1.8107260084455334	0.22723431382300552
RFM-000-968-7	Increasing	Male contraceptive screen [Acrosome]	W0002529	D16	2.5	16	D	Pi-_PNA-	root	311	584	53.25342465753424	64.50637936179254	0.21014146720799776
RFM-000-968-7	Increasing	Male contraceptive screen [Acrosome]	W0002529	D17	1.25	17	D	Pi+_PNA-	root	61	536	11.380597014925373	15.345281261585482	0.18433462035789397
RFM-000-968-7	Increasing	Male contraceptive screen [Acrosome]	W0002529	D17	1.25	17	D	Pi+_PNA+	root	167	536	31.156716417910445	18.337613368176434	0.25304116067311144
RFM-000-968-7	Increasing	Male contraceptive screen [Acrosome]	W0002529	D17	1.25	17	D	Pi-_PNA+	root	27	536	5.037313432835821	1.8107260084455334	0.22723431382300552
RFM-000-968-7	Increasing	Male contraceptive screen [Acrosome]	W0002529	D17	1.25	17	D	Pi-_PNA-	root	281	536	52.42537313432835	64.50637936179254	0.21014146720799776
RFM-000-968-7	Increasing	Male contraceptive screen [Acrosome]	W0002529	D18	0.373	18	D	Pi+_PNA-	root	69	598	11.538461538461538	15.345281261585482	0.18433462035789397
RFM-000-968-7	Increasing	Male contraceptive screen [Acrosome]	W0002529	D18	0.373	18	D	Pi+_PNA+	root	198	598	33.11036789297659	18.337613368176434	0.25304116067311144
RFM-000-968-7	Increasing	Male contraceptive screen [Acrosome]	W0002529	D18	0.373	18	D	Pi-_PNA+	root	21	598	3.511705685618729	1.8107260084455334	0.22723431382300552
RFM-000-968-7	Increasing	Male contraceptive screen [Acrosome]	W0002529	D18	0.373	18	D	Pi-_PNA-	root	310	598	51.83946488294314	64.50637936179254	0.21014146720799776
RFM-000-968-7	Increasing	Male contraceptive screen [Acrosome]	W0002529	D19	0.0932	19	D	Pi+_PNA-	root	58	527	11.005692599620494	15.345281261585482	0.18433462035789397
RFM-000-968-7	Increasing	Male contraceptive screen [Acrosome]	W0002529	D19	0.0932	19	D	Pi+_PNA+	root	182	527	34.53510436432637	18.337613368176434	0.25304116067311144
RFM-000-968-7	Increasing	Male contraceptive screen [Acrosome]	W0002529	D19	0.0932	19	D	Pi-_PNA+	root	20	527	3.795066413662239	1.8107260084455334	0.22723431382300552
RFM-000-968-7	Increasing	Male contraceptive screen [Acrosome]	W0002529	D19	0.0932	19	D	Pi-_PNA-	root	267	527	50.664136622390885	64.50637936179254	0.21014146720799776
RFM-000-968-7	Increasing	Male contraceptive screen [Acrosome]	W0002529	D20	0.0466	20	D	Pi+_PNA-	root	77	579	13.298791018998275	15.345281261585482	0.18433462035789397
RFM-000-968-7	Increasing	Male contraceptive screen [Acrosome]	W0002529	D20	0.0466	20	D	Pi+_PNA+	root	221	579	38.1692573402418	18.337613368176434	0.25304116067311144
RFM-000-968-7	Increasing	Male contraceptive screen [Acrosome]	W0002529	D20	0.0466	20	D	Pi-_PNA+	root	7	579	1.2089810017271159	1.8107260084455334	0.22723431382300552
RFM-000-968-7	Increasing	Male contraceptive screen [Acrosome]	W0002529	D20	0.0466	20	D	Pi-_PNA-	root	274	579	47.32297063903281	64.50637936179254	0.21014146720799776
RFM-000-968-7	Increasing	Male contraceptive screen [Acrosome]	W0002529	D21	0.0139	21	D	Pi+_PNA-	root	70	545	12.844036697247708	15.345281261585482	0.18433462035789397
RFM-000-968-7	Increasing	Male contraceptive screen [Acrosome]	W0002529	D21	0.0139	21	D	Pi+_PNA+	root	168	545	30.825688073394495	18.337613368176434	0.25304116067311144
RFM-000-968-7	Increasing	Male contraceptive screen [Acrosome]	W0002529	D21	0.0139	21	D	Pi-_PNA+	root	17	545	3.1192660550458715	1.8107260084455334	0.22723431382300552
RFM-000-968-7	Increasing	Male contraceptive screen [Acrosome]	W0002529	D21	0.0139	21	D	Pi-_PNA-	root	290	545	53.21100917431193	64.50637936179254	0.21014146720799776
RFM-000-968-7	Increasing	Male contraceptive screen [Acrosome]	W0002529	D22	0.00346	22	D	Pi+_PNA-	root	46	505	9.108910891089108	15.345281261585482	0.18433462035789397
RFM-000-968-7	Increasing	Male contraceptive screen [Acrosome]	W0002529	D22	0.00346	22	D	Pi+_PNA+	root	154	505	30.495049504950494	18.337613368176434	0.25304116067311144
RFM-000-968-7	Increasing	Male contraceptive screen [Acrosome]	W0002529	D22	0.00346	22	D	Pi-_PNA+	root	16	505	3.1683168316831685	1.8107260084455334	0.22723431382300552
RFM-000-968-7	Increasing	Male contraceptive screen [Acrosome]	W0002529	D22	0.00346	22	D	Pi-_PNA-	root	289	505	57.227722772277225	64.50637936179254	0.21014146720799776
RFM-000-968-7	Increasing	Male contraceptive screen [Acrosome]	W0002539	D18	0.373	18	D	Pi+_PNA-	root	80	576	13.88888888888889	20.274573419850995	2.0977667627974044
RFM-000-968-7	Increasing	Male contraceptive screen [Acrosome]	W0002539	D18	0.373	18	D	Pi+_PNA+	root	219	576	38.02083333333333	20.366198029319875	0.6079515140591172
RFM-000-968-7	Increasing	Male contraceptive screen [Acrosome]	W0002539	D18	0.373	18	D	Pi-_PNA+	root	14	576	2.430555555555556	2.119382360009613	0.43425108147080016
RFM-000-968-7	Increasing	Male contraceptive screen [Acrosome]	W0002539	D18	0.373	18	D	Pi-_PNA-	root	263	576	45.65972222222222	57.23984619081952	2.271467195385733
RFM-000-968-7	Increasing	Male contraceptive screen [Acrosome]	W0002539	D19	0.0932	19	D	Pi+_PNA-	root	76	514	14.785992217898833	20.274573419850995	2.0977667627974044
RFM-000-968-7	Increasing	Male contraceptive screen [Acrosome]	W0002539	D19	0.0932	19	D	Pi+_PNA+	root	189	514	36.77042801556421	20.366198029319875	0.6079515140591172
RFM-000-968-7	Increasing	Male contraceptive screen [Acrosome]	W0002539	D19	0.0932	19	D	Pi-_PNA+	root	29	514	5.642023346303502	2.119382360009613	0.43425108147080016
RFM-000-968-7	Increasing	Male contraceptive screen [Acrosome]	W0002539	D19	0.0932	19	D	Pi-_PNA-	root	220	514	42.80155642023346	57.23984619081952	2.271467195385733
RFM-000-968-7	Increasing	Male contraceptive screen [Acrosome]	W0002539	D20	0.0466	20	D	Pi+_PNA-	root	95	631	15.055467511885896	20.274573419850995	2.0977667627974044
RFM-000-968-7	Increasing	Male contraceptive screen [Acrosome]	W0002539	D20	0.0466	20	D	Pi+_PNA+	root	193	631	30.58637083993661	20.366198029319875	0.6079515140591172
RFM-000-968-7	Increasing	Male contraceptive screen [Acrosome]	W0002539	D20	0.0466	20	D	Pi-_PNA+	root	17	631	2.694136291600634	2.119382360009613	0.43425108147080016
RFM-000-968-7	Increasing	Male contraceptive screen [Acrosome]	W0002539	D20	0.0466	20	D	Pi-_PNA-	root	326	631	51.66402535657686	57.23984619081952	2.271467195385733
RFM-000-968-7	Increasing	Male contraceptive screen [Acrosome]	W0002539	D21	0.0139	21	D	Pi+_PNA-	root	86	534	16.10486891385768	20.274573419850995	2.0977667627974044
RFM-000-968-7	Increasing	Male contraceptive screen [Acrosome]	W0002539	D21	0.0139	21	D	Pi+_PNA+	root	197	534	36.89138576779026	20.366198029319875	0.6079515140591172
RFM-000-968-7	Increasing	Male contraceptive screen [Acrosome]	W0002539	D21	0.0139	21	D	Pi-_PNA+	root	18	534	3.3707865168539324	2.119382360009613	0.43425108147080016
RFM-000-968-7	Increasing	Male contraceptive screen [Acrosome]	W0002539	D21	0.0139	21	D	Pi-_PNA-	root	233	534	43.63295880149813	57.23984619081952	2.271467195385733
RFM-000-968-7	Increasing	Male contraceptive screen [Acrosome]	W0002539	D22	0.00346	22	D	Pi+_PNA-	root	55	483	11.387163561076605	20.274573419850995	2.0977667627974044
RFM-000-968-7	Increasing	Male contraceptive screen [Acrosome]	W0002539	D22	0.00346	22	D	Pi+_PNA+	root	159	483	32.91925465838509	20.366198029319875	0.6079515140591172
RFM-000-968-7	Increasing	Male contraceptive screen [Acrosome]	W0002539	D22	0.00346	22	D	Pi-_PNA+	root	16	483	3.3126293995859215	2.119382360009613	0.43425108147080016
RFM-000-968-7	Increasing	Male contraceptive screen [Acrosome]	W0002539	D22	0.00346	22	D	Pi-_PNA-	root	253	483	52.38095238095239	57.23984619081952	2.271467195385733
RFM-001-043-5	Increasing	Male contraceptive screen [Acrosome]	W0002529	F19	9.99	19	F	Pi+_PNA-	root	0	661	0	15.345281261585482	0.18433462035789397
RFM-001-043-5	Increasing	Male contraceptive screen [Acrosome]	W0002529	F19	9.99	19	F	Pi+_PNA+	root	168	661	25.416036308623298	18.337613368176434	0.25304116067311144
RFM-001-043-5	Increasing	Male contraceptive screen [Acrosome]	W0002529	F19	9.99	19	F	Pi-_PNA+	root	487	661	73.67624810892586	1.8107260084455334	0.22723431382300552
RFM-001-043-5	Increasing	Male contraceptive screen [Acrosome]	W0002529	F19	9.99	19	F	Pi-_PNA-	root	6	661	0.9077155824508321	64.50637936179254	0.21014146720799776
RFM-001-043-5	Increasing	Male contraceptive screen [Acrosome]	W0002529	F20	2.5	20	F	Pi+_PNA-	root	26	699	3.719599427753934	15.345281261585482	0.18433462035789397
RFM-001-043-5	Increasing	Male contraceptive screen [Acrosome]	W0002529	F20	2.5	20	F	Pi+_PNA+	root	147	699	21.030042918454935	18.337613368176434	0.25304116067311144
RFM-001-043-5	Increasing	Male contraceptive screen [Acrosome]	W0002529	F20	2.5	20	F	Pi-_PNA+	root	257	699	36.76680972818312	1.8107260084455334	0.22723431382300552
RFM-001-043-5	Increasing	Male contraceptive screen [Acrosome]	W0002529	F20	2.5	20	F	Pi-_PNA-	root	269	699	38.483547925608015	64.50637936179254	0.21014146720799776
RFM-001-043-5	Increasing	Male contraceptive screen [Acrosome]	W0002529	F21	1.25	21	F	Pi+_PNA-	root	34	614	5.537459283387622	15.345281261585482	0.18433462035789397
RFM-001-043-5	Increasing	Male contraceptive screen [Acrosome]	W0002529	F21	1.25	21	F	Pi+_PNA+	root	137	614	22.31270358306189	18.337613368176434	0.25304116067311144
RFM-001-043-5	Increasing	Male contraceptive screen [Acrosome]	W0002529	F21	1.25	21	F	Pi-_PNA+	root	89	614	14.495114006514658	1.8107260084455334	0.22723431382300552
RFM-001-043-5	Increasing	Male contraceptive screen [Acrosome]	W0002529	F21	1.25	21	F	Pi-_PNA-	root	354	614	57.65472312703584	64.50637936179254	0.21014146720799776
RFM-001-043-5	Increasing	Male contraceptive screen [Acrosome]	W0002529	F22	0.373	22	F	Pi+_PNA-	root	42	542	7.7490774907749085	15.345281261585482	0.18433462035789397
RFM-001-043-5	Increasing	Male contraceptive screen [Acrosome]	W0002529	F22	0.373	22	F	Pi+_PNA+	root	138	542	25.461254612546124	18.337613368176434	0.25304116067311144
RFM-001-043-5	Increasing	Male contraceptive screen [Acrosome]	W0002529	F22	0.373	22	F	Pi-_PNA+	root	23	542	4.243542435424354	1.8107260084455334	0.22723431382300552
RFM-001-043-5	Increasing	Male contraceptive screen [Acrosome]	W0002529	F22	0.373	22	F	Pi-_PNA-	root	339	542	62.54612546125461	64.50637936179254	0.21014146720799776
RFM-001-043-5	Increasing	Male contraceptive screen [Acrosome]	W0002529	G01	0.0932	01	G	Pi+_PNA-	root	52	559	9.30232558139535	15.345281261585482	0.18433462035789397
RFM-001-043-5	Increasing	Male contraceptive screen [Acrosome]	W0002529	G01	0.0932	01	G	Pi+_PNA+	root	119	559	21.288014311270125	18.337613368176434	0.25304116067311144
RFM-001-043-5	Increasing	Male contraceptive screen [Acrosome]	W0002529	G01	0.0932	01	G	Pi-_PNA+	root	21	559	3.7567084078711988	1.8107260084455334	0.22723431382300552
RFM-001-043-5	Increasing	Male contraceptive screen [Acrosome]	W0002529	G01	0.0932	01	G	Pi-_PNA-	root	367	559	65.65295169946333	64.50637936179254	0.21014146720799776
RFM-001-043-5	Increasing	Male contraceptive screen [Acrosome]	W0002529	G02	0.0466	02	G	Pi+_PNA-	root	52	593	8.768971332209107	15.345281261585482	0.18433462035789397
RFM-001-043-5	Increasing	Male contraceptive screen [Acrosome]	W0002529	G02	0.0466	02	G	Pi+_PNA+	root	162	593	27.318718381112983	18.337613368176434	0.25304116067311144
RFM-001-043-5	Increasing	Male contraceptive screen [Acrosome]	W0002529	G02	0.0466	02	G	Pi-_PNA+	root	16	593	2.6981450252951094	1.8107260084455334	0.22723431382300552
RFM-001-043-5	Increasing	Male contraceptive screen [Acrosome]	W0002529	G02	0.0466	02	G	Pi-_PNA-	root	363	593	61.2141652613828	64.50637936179254	0.21014146720799776
RFM-001-043-5	Increasing	Male contraceptive screen [Acrosome]	W0002529	G03	0.0139	03	G	Pi+_PNA-	root	54	525	10.285714285714285	15.345281261585482	0.18433462035789397
RFM-001-043-5	Increasing	Male contraceptive screen [Acrosome]	W0002529	G03	0.0139	03	G	Pi+_PNA+	root	133	525	25.333333333333336	18.337613368176434	0.25304116067311144
RFM-001-043-5	Increasing	Male contraceptive screen [Acrosome]	W0002529	G03	0.0139	03	G	Pi-_PNA+	root	20	525	3.8095238095238098	1.8107260084455334	0.22723431382300552
RFM-001-043-5	Increasing	Male contraceptive screen [Acrosome]	W0002529	G03	0.0139	03	G	Pi-_PNA-	root	318	525	60.57142857142858	64.50637936179254	0.21014146720799776
RFM-001-043-5	Increasing	Male contraceptive screen [Acrosome]	W0002529	G04	0.00346	04	G	Pi+_PNA-	root	49	537	9.124767225325884	15.345281261585482	0.18433462035789397
RFM-001-043-5	Increasing	Male contraceptive screen [Acrosome]	W0002529	G04	0.00346	04	G	Pi+_PNA+	root	105	537	19.553072625698324	18.337613368176434	0.25304116067311144
RFM-001-043-5	Increasing	Male contraceptive screen [Acrosome]	W0002529	G04	0.00346	04	G	Pi-_PNA+	root	17	537	3.165735567970205	1.8107260084455334	0.22723431382300552
RFM-001-043-5	Increasing	Male contraceptive screen [Acrosome]	W0002529	G04	0.00346	04	G	Pi-_PNA-	root	366	537	68.15642458100558	64.50637936179254	0.21014146720799776
RFM-001-043-5	Increasing	Male contraceptive screen [Acrosome]	W0002539	F22	0.373	22	F	Pi+_PNA-	root	86	661	13.010590015128592	20.274573419850995	2.0977667627974044
RFM-001-043-5	Increasing	Male contraceptive screen [Acrosome]	W0002539	F22	0.373	22	F	Pi+_PNA+	root	241	661	36.45990922844176	20.366198029319875	0.6079515140591172
RFM-001-043-5	Increasing	Male contraceptive screen [Acrosome]	W0002539	F22	0.373	22	F	Pi-_PNA+	root	31	661	4.689863842662632	2.119382360009613	0.43425108147080016
RFM-001-043-5	Increasing	Male contraceptive screen [Acrosome]	W0002539	F22	0.373	22	F	Pi-_PNA-	root	303	661	45.839636913767016	57.23984619081952	2.271467195385733
RFM-001-043-5	Increasing	Male contraceptive screen [Acrosome]	W0002539	G01	0.0932	01	G	Pi+_PNA-	root	76	710	10.704225352112676	20.274573419850995	2.0977667627974044
RFM-001-043-5	Increasing	Male contraceptive screen [Acrosome]	W0002539	G01	0.0932	01	G	Pi+_PNA+	root	196	710	27.605633802816904	20.366198029319875	0.6079515140591172
RFM-001-043-5	Increasing	Male contraceptive screen [Acrosome]	W0002539	G01	0.0932	01	G	Pi-_PNA+	root	23	710	3.2394366197183095	2.119382360009613	0.43425108147080016
RFM-001-043-5	Increasing	Male contraceptive screen [Acrosome]	W0002539	G01	0.0932	01	G	Pi-_PNA-	root	415	710	58.45070422535211	57.23984619081952	2.271467195385733
RFM-001-043-5	Increasing	Male contraceptive screen [Acrosome]	W0002539	G02	0.0466	02	G	Pi+_PNA-	root	55	545	10.091743119266056	20.274573419850995	2.0977667627974044
RFM-001-043-5	Increasing	Male contraceptive screen [Acrosome]	W0002539	G02	0.0466	02	G	Pi+_PNA+	root	157	545	28.807339449541285	20.366198029319875	0.6079515140591172
RFM-001-043-5	Increasing	Male contraceptive screen [Acrosome]	W0002539	G02	0.0466	02	G	Pi-_PNA+	root	33	545	6.055045871559633	2.119382360009613	0.43425108147080016
RFM-001-043-5	Increasing	Male contraceptive screen [Acrosome]	W0002539	G02	0.0466	02	G	Pi-_PNA-	root	300	545	55.04587155963303	57.23984619081952	2.271467195385733
RFM-001-043-5	Increasing	Male contraceptive screen [Acrosome]	W0002539	G03	0.0139	03	G	Pi+_PNA-	root	57	585	9.7435897435897445	20.274573419850995	2.0977667627974044
RFM-001-043-5	Increasing	Male contraceptive screen [Acrosome]	W0002539	G03	0.0139	03	G	Pi+_PNA+	root	168	585	28.717948717948715	20.366198029319875	0.6079515140591172
RFM-001-043-5	Increasing	Male contraceptive screen [Acrosome]	W0002539	G03	0.0139	03	G	Pi-_PNA+	root	22	585	3.7606837606837606	2.119382360009613	0.43425108147080016
RFM-001-043-5	Increasing	Male contraceptive screen [Acrosome]	W0002539	G03	0.0139	03	G	Pi-_PNA-	root	338	585	57.77777777777777	57.23984619081952	2.271467195385733
RFM-001-043-5	Increasing	Male contraceptive screen [Acrosome]	W0002539	G04	0.00346	04	G	Pi+_PNA-	root	69	548	12.59124087591241	20.274573419850995	2.0977667627974044
RFM-001-043-5	Increasing	Male contraceptive screen [Acrosome]	W0002539	G04	0.00346	04	G	Pi+_PNA+	root	156	548	28.467153284671532	20.366198029319875	0.6079515140591172
RFM-001-043-5	Increasing	Male contraceptive screen [Acrosome]	W0002539	G04	0.00346	04	G	Pi-_PNA+	root	24	548	4.37956204379562	2.119382360009613	0.43425108147080016
RFM-001-043-5	Increasing	Male contraceptive screen [Acrosome]	W0002539	G04	0.00346	04	G	Pi-_PNA-	root	299	548	54.56204379562044	57.23984619081952	2.271467195385733
RFM-006-618-2	Increasing	Male contraceptive screen [Acrosome]	W0002529	I09	9.99	09	I	Pi+_PNA-	root	16	702	2.2792022792022792	15.345281261585482	0.18433462035789397
RFM-006-618-2	Increasing	Male contraceptive screen [Acrosome]	W0002529	I09	9.99	09	I	Pi+_PNA+	root	163	702	23.219373219373217	18.337613368176434	0.25304116067311144
RFM-006-618-2	Increasing	Male contraceptive screen [Acrosome]	W0002529	I09	9.99	09	I	Pi-_PNA+	root	427	702	60.826210826210826	1.8107260084455334	0.22723431382300552
RFM-006-618-2	Increasing	Male contraceptive screen [Acrosome]	W0002529	I09	9.99	09	I	Pi-_PNA-	root	96	702	13.675213675213676	64.50637936179254	0.21014146720799776
RFM-006-618-2	Increasing	Male contraceptive screen [Acrosome]	W0002529	I10	2.5	10	I	Pi+_PNA-	root	40	761	5.256241787122208	15.345281261585482	0.18433462035789397
RFM-006-618-2	Increasing	Male contraceptive screen [Acrosome]	W0002529	I10	2.5	10	I	Pi+_PNA+	root	168	761	22.07621550591327	18.337613368176434	0.25304116067311144
RFM-006-618-2	Increasing	Male contraceptive screen [Acrosome]	W0002529	I10	2.5	10	I	Pi-_PNA+	root	111	761	14.586070959264127	1.8107260084455334	0.22723431382300552
RFM-006-618-2	Increasing	Male contraceptive screen [Acrosome]	W0002529	I10	2.5	10	I	Pi-_PNA-	root	442	761	58.0814717477004	64.50637936179254	0.21014146720799776
RFM-006-618-2	Increasing	Male contraceptive screen [Acrosome]	W0002529	I11	1.25	11	I	Pi+_PNA-	root	59	717	8.228730822873082	15.345281261585482	0.18433462035789397
RFM-006-618-2	Increasing	Male contraceptive screen [Acrosome]	W0002529	I11	1.25	11	I	Pi+_PNA+	root	198	717	27.615062761506277	18.337613368176434	0.25304116067311144
RFM-006-618-2	Increasing	Male contraceptive screen [Acrosome]	W0002529	I11	1.25	11	I	Pi-_PNA+	root	45	717	6.2761506276150625	1.8107260084455334	0.22723431382300552
RFM-006-618-2	Increasing	Male contraceptive screen [Acrosome]	W0002529	I11	1.25	11	I	Pi-_PNA-	root	415	717	57.88005578800558	64.50637936179254	0.21014146720799776
RFM-006-618-2	Increasing	Male contraceptive screen [Acrosome]	W0002529	I12	0.373	12	I	Pi+_PNA-	root	67	612	10.947712418300654	15.345281261585482	0.18433462035789397
RFM-006-618-2	Increasing	Male contraceptive screen [Acrosome]	W0002529	I12	0.373	12	I	Pi+_PNA+	root	157	612	25.653594771241828	18.337613368176434	0.25304116067311144
RFM-006-618-2	Increasing	Male contraceptive screen [Acrosome]	W0002529	I12	0.373	12	I	Pi-_PNA+	root	18	612	2.941176470588235	1.8107260084455334	0.22723431382300552
RFM-006-618-2	Increasing	Male contraceptive screen [Acrosome]	W0002529	I12	0.373	12	I	Pi-_PNA-	root	370	612	60.45751633986928	64.50637936179254	0.21014146720799776
RFM-006-618-2	Increasing	Male contraceptive screen [Acrosome]	W0002529	I13	0.0932	13	I	Pi+_PNA-	root	65	514	12.645914396887159	15.345281261585482	0.18433462035789397
RFM-006-618-2	Increasing	Male contraceptive screen [Acrosome]	W0002529	I13	0.0932	13	I	Pi+_PNA+	root	180	514	35.019455252918284	18.337613368176434	0.25304116067311144
RFM-006-618-2	Increasing	Male contraceptive screen [Acrosome]	W0002529	I13	0.0932	13	I	Pi-_PNA+	root	17	514	3.3073929961089497	1.8107260084455334	0.22723431382300552
RFM-006-618-2	Increasing	Male contraceptive screen [Acrosome]	W0002529	I13	0.0932	13	I	Pi-_PNA-	root	252	514	49.0272373540856	64.50637936179254	0.21014146720799776
RFM-006-618-2	Increasing	Male contraceptive screen [Acrosome]	W0002529	I14	0.0466	14	I	Pi+_PNA-	root	47	534	8.801498127340825	15.345281261585482	0.18433462035789397
RFM-006-618-2	Increasing	Male contraceptive screen [Acrosome]	W0002529	I14	0.0466	14	I	Pi+_PNA+	root	141	534	26.40449438202247	18.337613368176434	0.25304116067311144
RFM-006-618-2	Increasing	Male contraceptive screen [Acrosome]	W0002529	I14	0.0466	14	I	Pi-_PNA+	root	24	534	4.49438202247191	1.8107260084455334	0.22723431382300552
RFM-006-618-2	Increasing	Male contraceptive screen [Acrosome]	W0002529	I14	0.0466	14	I	Pi-_PNA-	root	322	534	60.2996254681648	64.50637936179254	0.21014146720799776
RFM-006-618-2	Increasing	Male contraceptive screen [Acrosome]	W0002529	I15	0.0139	15	I	Pi+_PNA-	root	61	497	12.273641851106639	15.345281261585482	0.18433462035789397
RFM-006-618-2	Increasing	Male contraceptive screen [Acrosome]	W0002529	I15	0.0139	15	I	Pi+_PNA+	root	122	497	24.547283702213278	18.337613368176434	0.25304116067311144
RFM-006-618-2	Increasing	Male contraceptive screen [Acrosome]	W0002529	I15	0.0139	15	I	Pi-_PNA+	root	11	497	2.2132796780684103	1.8107260084455334	0.22723431382300552
RFM-006-618-2	Increasing	Male contraceptive screen [Acrosome]	W0002529	I15	0.0139	15	I	Pi-_PNA-	root	303	497	60.96579476861167	64.50637936179254	0.21014146720799776
RFM-006-618-2	Increasing	Male contraceptive screen [Acrosome]	W0002529	I16	0.00346	16	I	Pi+_PNA-	root	59	587	10.051107325383304	15.345281261585482	0.18433462035789397
RFM-006-618-2	Increasing	Male contraceptive screen [Acrosome]	W0002529	I16	0.00346	16	I	Pi+_PNA+	root	208	587	35.43441226575809	18.337613368176434	0.25304116067311144
RFM-006-618-2	Increasing	Male contraceptive screen [Acrosome]	W0002529	I16	0.00346	16	I	Pi-_PNA+	root	13	587	2.2146507666098807	1.8107260084455334	0.22723431382300552
RFM-006-618-2	Increasing	Male contraceptive screen [Acrosome]	W0002529	I16	0.00346	16	I	Pi-_PNA-	root	307	587	52.29982964224872	64.50637936179254	0.21014146720799776
RFM-006-618-2	Increasing	Male contraceptive screen [Acrosome]	W0002539	I09	9.99	09	I	Pi+_PNA-	root	24	935	2.5668449197860963	20.274573419850995	2.0977667627974044
RFM-006-618-2	Increasing	Male contraceptive screen [Acrosome]	W0002539	I09	9.99	09	I	Pi+_PNA+	root	320	935	34.22459893048128	20.366198029319875	0.6079515140591172
RFM-006-618-2	Increasing	Male contraceptive screen [Acrosome]	W0002539	I09	9.99	09	I	Pi-_PNA+	root	404	935	43.208556149732615	2.119382360009613	0.43425108147080016
RFM-006-618-2	Increasing	Male contraceptive screen [Acrosome]	W0002539	I09	9.99	09	I	Pi-_PNA-	root	187	935	20	57.23984619081952	2.271467195385733
RFM-006-618-2	Increasing	Male contraceptive screen [Acrosome]	W0002539	I10	2.5	10	I	Pi+_PNA-	root	62	821	7.551766138855055	20.274573419850995	2.0977667627974044
RFM-006-618-2	Increasing	Male contraceptive screen [Acrosome]	W0002539	I10	2.5	10	I	Pi+_PNA+	root	279	821	33.982947624847746	20.366198029319875	0.6079515140591172
RFM-006-618-2	Increasing	Male contraceptive screen [Acrosome]	W0002539	I10	2.5	10	I	Pi-_PNA+	root	89	821	10.840438489646772	2.119382360009613	0.43425108147080016
RFM-006-618-2	Increasing	Male contraceptive screen [Acrosome]	W0002539	I10	2.5	10	I	Pi-_PNA-	root	391	821	47.62484774665043	57.23984619081952	2.271467195385733
RFM-006-618-2	Increasing	Male contraceptive screen [Acrosome]	W0002539	I11	1.25	11	I	Pi+_PNA-	root	80	849	9.422850412249705	20.274573419850995	2.0977667627974044
RFM-006-618-2	Increasing	Male contraceptive screen [Acrosome]	W0002539	I11	1.25	11	I	Pi+_PNA+	root	297	849	34.98233215547703	20.366198029319875	0.6079515140591172
RFM-006-618-2	Increasing	Male contraceptive screen [Acrosome]	W0002539	I11	1.25	11	I	Pi-_PNA+	root	35	849	4.122497055359246	2.119382360009613	0.43425108147080016
RFM-006-618-2	Increasing	Male contraceptive screen [Acrosome]	W0002539	I11	1.25	11	I	Pi-_PNA-	root	437	849	51.47232037691401	57.23984619081952	2.271467195385733
RFM-006-618-2	Increasing	Male contraceptive screen [Acrosome]	W0002539	I12	0.373	12	I	Pi+_PNA-	root	69	607	11.367380560131796	20.274573419850995	2.0977667627974044
RFM-006-618-2	Increasing	Male contraceptive screen [Acrosome]	W0002539	I12	0.373	12	I	Pi+_PNA+	root	143	607	23.55848434925865	20.366198029319875	0.6079515140591172
RFM-006-618-2	Increasing	Male contraceptive screen [Acrosome]	W0002539	I12	0.373	12	I	Pi-_PNA+	root	17	607	2.800658978583196	2.119382360009613	0.43425108147080016
RFM-006-618-2	Increasing	Male contraceptive screen [Acrosome]	W0002539	I12	0.373	12	I	Pi-_PNA-	root	378	607	62.27347611202636	57.23984619081952	2.271467195385733
RFM-006-618-2	Increasing	Male contraceptive screen [Acrosome]	W0002539	I13	0.0932	13	I	Pi+_PNA-	root	67	708	9.463276836158192	20.274573419850995	2.0977667627974044
RFM-006-618-2	Increasing	Male contraceptive screen [Acrosome]	W0002539	I13	0.0932	13	I	Pi+_PNA+	root	227	708	32.06214689265537	20.366198029319875	0.6079515140591172
RFM-006-618-2	Increasing	Male contraceptive screen [Acrosome]	W0002539	I13	0.0932	13	I	Pi-_PNA+	root	21	708	2.9661016949152543	2.119382360009613	0.43425108147080016
RFM-006-618-2	Increasing	Male contraceptive screen [Acrosome]	W0002539	I13	0.0932	13	I	Pi-_PNA-	root	393	708	55.50847457627118	57.23984619081952	2.271467195385733
RFM-006-618-2	Increasing	Male contraceptive screen [Acrosome]	W0002539	I14	0.0466	14	I	Pi+_PNA-	root	85	734	11.580381471389646	20.274573419850995	2.0977667627974044
RFM-006-618-2	Increasing	Male contraceptive screen [Acrosome]	W0002539	I14	0.0466	14	I	Pi+_PNA+	root	319	734	43.46049046321526	20.366198029319875	0.6079515140591172
RFM-006-618-2	Increasing	Male contraceptive screen [Acrosome]	W0002539	I14	0.0466	14	I	Pi-_PNA+	root	21	734	2.861035422343324	2.119382360009613	0.43425108147080016
RFM-006-618-2	Increasing	Male contraceptive screen [Acrosome]	W0002539	I14	0.0466	14	I	Pi-_PNA-	root	309	734	42.09809264305177	57.23984619081952	2.271467195385733
RFM-006-618-2	Increasing	Male contraceptive screen [Acrosome]	W0002539	I15	0.0139	15	I	Pi+_PNA-	root	52	516	10.077519379844961	20.274573419850995	2.0977667627974044
RFM-006-618-2	Increasing	Male contraceptive screen [Acrosome]	W0002539	I15	0.0139	15	I	Pi+_PNA+	root	150	516	29.069767441860467	20.366198029319875	0.6079515140591172
RFM-006-618-2	Increasing	Male contraceptive screen [Acrosome]	W0002539	I15	0.0139	15	I	Pi-_PNA+	root	28	516	5.426356589147287	2.119382360009613	0.43425108147080016
RFM-006-618-2	Increasing	Male contraceptive screen [Acrosome]	W0002539	I15	0.0139	15	I	Pi-_PNA-	root	286	516	55.42635658914728	57.23984619081952	2.271467195385733
RFM-006-618-2	Increasing	Male contraceptive screen [Acrosome]	W0002539	I16	0.00346	16	I	Pi+_PNA-	root	71	615	11.544715447154472	20.274573419850995	2.0977667627974044
RFM-006-618-2	Increasing	Male contraceptive screen [Acrosome]	W0002539	I16	0.00346	16	I	Pi+_PNA+	root	196	615	31.869918699186993	20.366198029319875	0.6079515140591172
RFM-006-618-2	Increasing	Male contraceptive screen [Acrosome]	W0002539	I16	0.00346	16	I	Pi-_PNA+	root	19	615	3.089430894308943	2.119382360009613	0.43425108147080016
RFM-006-618-2	Increasing	Male contraceptive screen [Acrosome]	W0002539	I16	0.00346	16	I	Pi-_PNA-	root	329	615	53.49593495934959	57.23984619081952	2.271467195385733
RFM-000-317-8	Increasing	Male contraceptive screen [Acrosome]	W0002529	K13	9.99	13	K	Pi+_PNA-	root	11	543	2.0257826887661143	15.345281261585482	0.18433462035789397
RFM-000-317-8	Increasing	Male contraceptive screen [Acrosome]	W0002529	K13	9.99	13	K	Pi+_PNA+	root	171	543	31.491712707182316	18.337613368176434	0.25304116067311144
RFM-000-317-8	Increasing	Male contraceptive screen [Acrosome]	W0002529	K13	9.99	13	K	Pi-_PNA+	root	156	543	28.7292817679558	1.8107260084455334	0.22723431382300552
RFM-000-317-8	Increasing	Male contraceptive screen [Acrosome]	W0002529	K13	9.99	13	K	Pi-_PNA-	root	205	543	37.75322283609576	64.50637936179254	0.21014146720799776
RFM-000-317-8	Increasing	Male contraceptive screen [Acrosome]	W0002529	K14	2.5	14	K	Pi+_PNA-	root	31	415	7.46987951807229	15.345281261585482	0.18433462035789397
RFM-000-317-8	Increasing	Male contraceptive screen [Acrosome]	W0002529	K14	2.5	14	K	Pi+_PNA+	root	150	415	36.144578313253014	18.337613368176434	0.25304116067311144
RFM-000-317-8	Increasing	Male contraceptive screen [Acrosome]	W0002529	K14	2.5	14	K	Pi-_PNA+	root	63	415	15.180722891566264	1.8107260084455334	0.22723431382300552
RFM-000-317-8	Increasing	Male contraceptive screen [Acrosome]	W0002529	K14	2.5	14	K	Pi-_PNA-	root	171	415	41.204819277108435	64.50637936179254	0.21014146720799776
RFM-000-317-8	Increasing	Male contraceptive screen [Acrosome]	W0002529	K15	1.25	15	K	Pi+_PNA-	root	51	547	9.323583180987203	15.345281261585482	0.18433462035789397
RFM-000-317-8	Increasing	Male contraceptive screen [Acrosome]	W0002529	K15	1.25	15	K	Pi+_PNA+	root	155	547	28.336380255941503	18.337613368176434	0.25304116067311144
RFM-000-317-8	Increasing	Male contraceptive screen [Acrosome]	W0002529	K15	1.25	15	K	Pi-_PNA+	root	26	547	4.753199268738574	1.8107260084455334	0.22723431382300552
RFM-000-317-8	Increasing	Male contraceptive screen [Acrosome]	W0002529	K15	1.25	15	K	Pi-_PNA-	root	315	547	57.586837294332724	64.50637936179254	0.21014146720799776
RFM-000-317-8	Increasing	Male contraceptive screen [Acrosome]	W0002529	K16	0.373	16	K	Pi+_PNA-	root	75	615	12.195121951219512	15.345281261585482	0.18433462035789397
RFM-000-317-8	Increasing	Male contraceptive screen [Acrosome]	W0002529	K16	0.373	16	K	Pi+_PNA+	root	222	615	36.09756097560975	18.337613368176434	0.25304116067311144
RFM-000-317-8	Increasing	Male contraceptive screen [Acrosome]	W0002529	K16	0.373	16	K	Pi-_PNA+	root	28	615	4.5528455284552845	1.8107260084455334	0.22723431382300552
RFM-000-317-8	Increasing	Male contraceptive screen [Acrosome]	W0002529	K16	0.373	16	K	Pi-_PNA-	root	290	615	47.15447154471545	64.50637936179254	0.21014146720799776
RFM-000-317-8	Increasing	Male contraceptive screen [Acrosome]	W0002529	K17	0.0932	17	K	Pi+_PNA-	root	50	501	9.980039920159681	15.345281261585482	0.18433462035789397
RFM-000-317-8	Increasing	Male contraceptive screen [Acrosome]	W0002529	K17	0.0932	17	K	Pi+_PNA+	root	169	501	33.73253493013972	18.337613368176434	0.25304116067311144
RFM-000-317-8	Increasing	Male contraceptive screen [Acrosome]	W0002529	K17	0.0932	17	K	Pi-_PNA+	root	13	501	2.5948103792415167	1.8107260084455334	0.22723431382300552
RFM-000-317-8	Increasing	Male contraceptive screen [Acrosome]	W0002529	K17	0.0932	17	K	Pi-_PNA-	root	269	501	53.69261477045908	64.50637936179254	0.21014146720799776
RFM-000-317-8	Increasing	Male contraceptive screen [Acrosome]	W0002529	K18	0.0466	18	K	Pi+_PNA-	root	63	449	14.03118040089087	15.345281261585482	0.18433462035789397
RFM-000-317-8	Increasing	Male contraceptive screen [Acrosome]	W0002529	K18	0.0466	18	K	Pi+_PNA+	root	122	449	27.171492204899778	18.337613368176434	0.25304116067311144
RFM-000-317-8	Increasing	Male contraceptive screen [Acrosome]	W0002529	K18	0.0466	18	K	Pi-_PNA+	root	15	449	3.34075723830735	1.8107260084455334	0.22723431382300552
RFM-000-317-8	Increasing	Male contraceptive screen [Acrosome]	W0002529	K18	0.0466	18	K	Pi-_PNA-	root	249	449	55.45657015590201	64.50637936179254	0.21014146720799776
RFM-000-317-8	Increasing	Male contraceptive screen [Acrosome]	W0002529	K19	0.0139	19	K	Pi+_PNA-	root	53	477	11.11111111111111	15.345281261585482	0.18433462035789397
RFM-000-317-8	Increasing	Male contraceptive screen [Acrosome]	W0002529	K19	0.0139	19	K	Pi+_PNA+	root	130	477	27.253668763102723	18.337613368176434	0.25304116067311144
RFM-000-317-8	Increasing	Male contraceptive screen [Acrosome]	W0002529	K19	0.0139	19	K	Pi-_PNA+	root	17	477	3.563941299790356	1.8107260084455334	0.22723431382300552
RFM-000-317-8	Increasing	Male contraceptive screen [Acrosome]	W0002529	K19	0.0139	19	K	Pi-_PNA-	root	277	477	58.07127882599581	64.50637936179254	0.21014146720799776
RFM-000-317-8	Increasing	Male contraceptive screen [Acrosome]	W0002529	K20	0.00346	20	K	Pi+_PNA-	root	58	438	13.24200913242009	15.345281261585482	0.18433462035789397
RFM-000-317-8	Increasing	Male contraceptive screen [Acrosome]	W0002529	K20	0.00346	20	K	Pi+_PNA+	root	171	438	39.04109589041096	18.337613368176434	0.25304116067311144
RFM-000-317-8	Increasing	Male contraceptive screen [Acrosome]	W0002529	K20	0.00346	20	K	Pi-_PNA+	root	10	438	2.28310502283105	1.8107260084455334	0.22723431382300552
RFM-000-317-8	Increasing	Male contraceptive screen [Acrosome]	W0002529	K20	0.00346	20	K	Pi-_PNA-	root	199	438	45.4337899543379	64.50637936179254	0.21014146720799776
RFM-000-317-8	Increasing	Male contraceptive screen [Acrosome]	W0002539	K13	9.99	13	K	Pi+_PNA-	root	13	517	2.5145067698259185	20.274573419850995	2.0977667627974044
RFM-000-317-8	Increasing	Male contraceptive screen [Acrosome]	W0002539	K13	9.99	13	K	Pi+_PNA+	root	221	517	42.74661508704062	20.366198029319875	0.6079515140591172
RFM-000-317-8	Increasing	Male contraceptive screen [Acrosome]	W0002539	K13	9.99	13	K	Pi-_PNA+	root	143	517	27.659574468085108	2.119382360009613	0.43425108147080016
RFM-000-317-8	Increasing	Male contraceptive screen [Acrosome]	W0002539	K13	9.99	13	K	Pi-_PNA-	root	140	517	27.079303675048354	57.23984619081952	2.271467195385733
RFM-000-317-8	Increasing	Male contraceptive screen [Acrosome]	W0002539	K14	2.5	14	K	Pi+_PNA-	root	41	528	7.765151515151516	20.274573419850995	2.0977667627974044
RFM-000-317-8	Increasing	Male contraceptive screen [Acrosome]	W0002539	K14	2.5	14	K	Pi+_PNA+	root	208	528	39.39393939393939	20.366198029319875	0.6079515140591172
RFM-000-317-8	Increasing	Male contraceptive screen [Acrosome]	W0002539	K14	2.5	14	K	Pi-_PNA+	root	80	528	15.151515151515152	2.119382360009613	0.43425108147080016
RFM-000-317-8	Increasing	Male contraceptive screen [Acrosome]	W0002539	K14	2.5	14	K	Pi-_PNA-	root	199	528	37.68939393939394	57.23984619081952	2.271467195385733
RFM-000-317-8	Increasing	Male contraceptive screen [Acrosome]	W0002539	K15	1.25	15	K	Pi+_PNA-	root	43	502	8.565737051792828	20.274573419850995	2.0977667627974044
RFM-000-317-8	Increasing	Male contraceptive screen [Acrosome]	W0002539	K15	1.25	15	K	Pi+_PNA+	root	182	502	36.254980079681275	20.366198029319875	0.6079515140591172
RFM-000-317-8	Increasing	Male contraceptive screen [Acrosome]	W0002539	K15	1.25	15	K	Pi-_PNA+	root	47	502	9.362549800796813	2.119382360009613	0.43425108147080016
RFM-000-317-8	Increasing	Male contraceptive screen [Acrosome]	W0002539	K15	1.25	15	K	Pi-_PNA-	root	230	502	45.81673306772908	57.23984619081952	2.271467195385733
RFM-000-317-8	Increasing	Male contraceptive screen [Acrosome]	W0002539	K16	0.373	16	K	Pi+_PNA-	root	53	561	9.44741532976827	20.274573419850995	2.0977667627974044
RFM-000-317-8	Increasing	Male contraceptive screen [Acrosome]	W0002539	K16	0.373	16	K	Pi+_PNA+	root	187	561	33.33333333333333	20.366198029319875	0.6079515140591172
RFM-000-317-8	Increasing	Male contraceptive screen [Acrosome]	W0002539	K16	0.373	16	K	Pi-_PNA+	root	33	561	5.88235294117647	2.119382360009613	0.43425108147080016
RFM-000-317-8	Increasing	Male contraceptive screen [Acrosome]	W0002539	K16	0.373	16	K	Pi-_PNA-	root	288	561	51.33689839572193	57.23984619081952	2.271467195385733
RFM-000-317-8	Increasing	Male contraceptive screen [Acrosome]	W0002539	K17	0.0932	17	K	Pi+_PNA-	root	67	573	11.69284467713787	20.274573419850995	2.0977667627974044
RFM-000-317-8	Increasing	Male contraceptive screen [Acrosome]	W0002539	K17	0.0932	17	K	Pi+_PNA+	root	172	573	30.017452006980804	20.366198029319875	0.6079515140591172
RFM-000-317-8	Increasing	Male contraceptive screen [Acrosome]	W0002539	K17	0.0932	17	K	Pi-_PNA+	root	20	573	3.4904013961605584	2.119382360009613	0.43425108147080016
RFM-000-317-8	Increasing	Male contraceptive screen [Acrosome]	W0002539	K17	0.0932	17	K	Pi-_PNA-	root	314	573	54.79930191972077	57.23984619081952	2.271467195385733
RFM-000-317-8	Increasing	Male contraceptive screen [Acrosome]	W0002539	K18	0.0466	18	K	Pi+_PNA-	root	71	620	11.451612903225806	20.274573419850995	2.0977667627974044
RFM-000-317-8	Increasing	Male contraceptive screen [Acrosome]	W0002539	K18	0.0466	18	K	Pi+_PNA+	root	224	620	36.12903225806451	20.366198029319875	0.6079515140591172
RFM-000-317-8	Increasing	Male contraceptive screen [Acrosome]	W0002539	K18	0.0466	18	K	Pi-_PNA+	root	13	620	2.0967741935483875	2.119382360009613	0.43425108147080016
RFM-000-317-8	Increasing	Male contraceptive screen [Acrosome]	W0002539	K18	0.0466	18	K	Pi-_PNA-	root	312	620	50.32258064516129	57.23984619081952	2.271467195385733
RFM-000-317-8	Increasing	Male contraceptive screen [Acrosome]	W0002539	K19	0.0139	19	K	Pi+_PNA-	root	54	461	11.713665943600867	20.274573419850995	2.0977667627974044
RFM-000-317-8	Increasing	Male contraceptive screen [Acrosome]	W0002539	K19	0.0139	19	K	Pi+_PNA+	root	156	461	33.839479392624725	20.366198029319875	0.6079515140591172
RFM-000-317-8	Increasing	Male contraceptive screen [Acrosome]	W0002539	K19	0.0139	19	K	Pi-_PNA+	root	10	461	2.1691973969631237	2.119382360009613	0.43425108147080016
RFM-000-317-8	Increasing	Male contraceptive screen [Acrosome]	W0002539	K19	0.0139	19	K	Pi-_PNA-	root	241	461	52.27765726681128	57.23984619081952	2.271467195385733
RFM-000-317-8	Increasing	Male contraceptive screen [Acrosome]	W0002539	K20	0.00346	20	K	Pi+_PNA-	root	43	461	9.327548806941431	20.274573419850995	2.0977667627974044
RFM-000-317-8	Increasing	Male contraceptive screen [Acrosome]	W0002539	K20	0.00346	20	K	Pi+_PNA+	root	182	461	39.479392624728845	20.366198029319875	0.6079515140591172
RFM-000-317-8	Increasing	Male contraceptive screen [Acrosome]	W0002539	K20	0.00346	20	K	Pi-_PNA+	root	17	461	3.68763557483731	2.119382360009613	0.43425108147080016
RFM-000-317-8	Increasing	Male contraceptive screen [Acrosome]	W0002539	K20	0.00346	20	K	Pi-_PNA-	root	219	461	47.50542299349241	57.23984619081952	2.271467195385733
RFM-006-521-4	Increasing	Male contraceptive screen [Acrosome]	W0002529	O21	9.99	21	O	Pi+_PNA-	root	1	1522	0.0657030223390276	15.345281261585482	0.18433462035789397
RFM-006-521-4	Increasing	Male contraceptive screen [Acrosome]	W0002529	O21	9.99	21	O	Pi+_PNA+	root	318	1522	20.893561103810775	18.337613368176434	0.25304116067311144
RFM-006-521-4	Increasing	Male contraceptive screen [Acrosome]	W0002529	O21	9.99	21	O	Pi-_PNA+	root	1202	1522	78.97503285151117	1.8107260084455334	0.22723431382300552
RFM-006-521-4	Increasing	Male contraceptive screen [Acrosome]	W0002529	O21	9.99	21	O	Pi-_PNA-	root	1	1522	0.0657030223390276	64.50637936179254	0.21014146720799776
RFM-006-521-4	Increasing	Male contraceptive screen [Acrosome]	W0002529	O22	2.5	22	O	Pi+_PNA-	root	6	1149	0.5221932114882507	15.345281261585482	0.18433462035789397
RFM-006-521-4	Increasing	Male contraceptive screen [Acrosome]	W0002529	O22	2.5	22	O	Pi+_PNA+	root	298	1149	25.935596170583114	18.337613368176434	0.25304116067311144
RFM-006-521-4	Increasing	Male contraceptive screen [Acrosome]	W0002529	O22	2.5	22	O	Pi-_PNA+	root	844	1149	73.45517841601392	1.8107260084455334	0.22723431382300552
RFM-006-521-4	Increasing	Male contraceptive screen [Acrosome]	W0002529	O22	2.5	22	O	Pi-_PNA-	root	1	1149	0.08703220191470844	64.50637936179254	0.21014146720799776
RFM-006-521-4	Increasing	Male contraceptive screen [Acrosome]	W0002529	P01	1.25	01	P	Pi+_PNA-	root	71	1651	4.300423985463356	15.345281261585482	0.18433462035789397
RFM-006-521-4	Increasing	Male contraceptive screen [Acrosome]	W0002529	P01	1.25	01	P	Pi+_PNA+	root	323	1651	19.56390066626287	18.337613368176434	0.25304116067311144
RFM-006-521-4	Increasing	Male contraceptive screen [Acrosome]	W0002529	P01	1.25	01	P	Pi-_PNA+	root	1230	1651	74.50030284675954	1.8107260084455334	0.22723431382300552
RFM-006-521-4	Increasing	Male contraceptive screen [Acrosome]	W0002529	P01	1.25	01	P	Pi-_PNA-	root	27	1651	1.6353725015142337	64.50637936179254	0.21014146720799776
RFM-006-521-4	Increasing	Male contraceptive screen [Acrosome]	W0002529	P02	0.373	02	P	Pi+_PNA-	root	96	1622	5.9186189889025895	15.345281261585482	0.18433462035789397
RFM-006-521-4	Increasing	Male contraceptive screen [Acrosome]	W0002529	P02	0.373	02	P	Pi+_PNA+	root	262	1622	16.152897657213316	18.337613368176434	0.25304116067311144
RFM-006-521-4	Increasing	Male contraceptive screen [Acrosome]	W0002529	P02	0.373	02	P	Pi-_PNA+	root	552	1622	34.03205918618989	1.8107260084455334	0.22723431382300552
RFM-006-521-4	Increasing	Male contraceptive screen [Acrosome]	W0002529	P02	0.373	02	P	Pi-_PNA-	root	712	1622	43.89642416769421	64.50637936179254	0.21014146720799776
RFM-006-521-4	Increasing	Male contraceptive screen [Acrosome]	W0002529	P03	0.0932	03	P	Pi+_PNA-	root	144	1182	12.18274111675127	15.345281261585482	0.18433462035789397
RFM-006-521-4	Increasing	Male contraceptive screen [Acrosome]	W0002529	P03	0.0932	03	P	Pi+_PNA+	root	239	1182	20.21996615905245	18.337613368176434	0.25304116067311144
RFM-006-521-4	Increasing	Male contraceptive screen [Acrosome]	W0002529	P03	0.0932	03	P	Pi-_PNA+	root	58	1182	4.906937394247039	1.8107260084455334	0.22723431382300552
RFM-006-521-4	Increasing	Male contraceptive screen [Acrosome]	W0002529	P03	0.0932	03	P	Pi-_PNA-	root	741	1182	62.69035532994924	64.50637936179254	0.21014146720799776
RFM-006-521-4	Increasing	Male contraceptive screen [Acrosome]	W0002529	P04	0.0466	04	P	Pi+_PNA-	root	135	1238	10.904684975767367	15.345281261585482	0.18433462035789397
RFM-006-521-4	Increasing	Male contraceptive screen [Acrosome]	W0002529	P04	0.0466	04	P	Pi+_PNA+	root	314	1238	25.363489499192244	18.337613368176434	0.25304116067311144
RFM-006-521-4	Increasing	Male contraceptive screen [Acrosome]	W0002529	P04	0.0466	04	P	Pi-_PNA+	root	37	1238	2.988691437802908	1.8107260084455334	0.22723431382300552
RFM-006-521-4	Increasing	Male contraceptive screen [Acrosome]	W0002529	P04	0.0466	04	P	Pi-_PNA-	root	752	1238	60.74313408723748	64.50637936179254	0.21014146720799776
RFM-006-521-4	Increasing	Male contraceptive screen [Acrosome]	W0002529	P05	0.0139	05	P	Pi+_PNA-	root	102	995	10.251256281407036	15.345281261585482	0.18433462035789397
RFM-006-521-4	Increasing	Male contraceptive screen [Acrosome]	W0002529	P05	0.0139	05	P	Pi+_PNA+	root	177	995	17.78894472361809	18.337613368176434	0.25304116067311144
RFM-006-521-4	Increasing	Male contraceptive screen [Acrosome]	W0002529	P05	0.0139	05	P	Pi-_PNA+	root	56	995	5.628140703517588	1.8107260084455334	0.22723431382300552
RFM-006-521-4	Increasing	Male contraceptive screen [Acrosome]	W0002529	P05	0.0139	05	P	Pi-_PNA-	root	660	995	66.33165829145729	64.50637936179254	0.21014146720799776
RFM-006-521-4	Increasing	Male contraceptive screen [Acrosome]	W0002529	P06	0.00346	06	P	Pi+_PNA-	root	123	1133	10.85613415710503	15.345281261585482	0.18433462035789397
RFM-006-521-4	Increasing	Male contraceptive screen [Acrosome]	W0002529	P06	0.00346	06	P	Pi+_PNA+	root	214	1133	18.887908208296558	18.337613368176434	0.25304116067311144
RFM-006-521-4	Increasing	Male contraceptive screen [Acrosome]	W0002529	P06	0.00346	06	P	Pi-_PNA+	root	35	1133	3.089143865842895	1.8107260084455334	0.22723431382300552
RFM-006-521-4	Increasing	Male contraceptive screen [Acrosome]	W0002529	P06	0.00346	06	P	Pi-_PNA-	root	761	1133	67.16681376875552	64.50637936179254	0.21014146720799776
RFM-006-521-4	Increasing	Male contraceptive screen [Acrosome]	W0002539	O21	9.99	21	O	Pi+_PNA-	root	0	1611	0	20.274573419850995	2.0977667627974044
RFM-006-521-4	Increasing	Male contraceptive screen [Acrosome]	W0002539	O21	9.99	21	O	Pi+_PNA+	root	437	1611	27.1260086902545	20.366198029319875	0.6079515140591172
RFM-006-521-4	Increasing	Male contraceptive screen [Acrosome]	W0002539	O21	9.99	21	O	Pi-_PNA+	root	1172	1611	72.74984481688392	2.119382360009613	0.43425108147080016
RFM-006-521-4	Increasing	Male contraceptive screen [Acrosome]	W0002539	O21	9.99	21	O	Pi-_PNA-	root	2	1611	0.12414649286157665	57.23984619081952	2.271467195385733
RFM-006-521-4	Increasing	Male contraceptive screen [Acrosome]	W0002539	O22	2.5	22	O	Pi+_PNA-	root	7	1374	0.5094614264919942	20.274573419850995	2.0977667627974044
RFM-006-521-4	Increasing	Male contraceptive screen [Acrosome]	W0002539	O22	2.5	22	O	Pi+_PNA+	root	443	1374	32.24163027656478	20.366198029319875	0.6079515140591172
RFM-006-521-4	Increasing	Male contraceptive screen [Acrosome]	W0002539	O22	2.5	22	O	Pi-_PNA+	root	920	1374	66.95778748180496	2.119382360009613	0.43425108147080016
RFM-006-521-4	Increasing	Male contraceptive screen [Acrosome]	W0002539	O22	2.5	22	O	Pi-_PNA-	root	4	1374	0.2911208151382824	57.23984619081952	2.271467195385733
RFM-006-521-4	Increasing	Male contraceptive screen [Acrosome]	W0002539	P01	1.25	01	P	Pi+_PNA-	root	85	1817	4.678040726472207	20.274573419850995	2.0977667627974044
RFM-006-521-4	Increasing	Male contraceptive screen [Acrosome]	W0002539	P01	1.25	01	P	Pi+_PNA+	root	404	1817	22.234452394056138	20.366198029319875	0.6079515140591172
RFM-006-521-4	Increasing	Male contraceptive screen [Acrosome]	W0002539	P01	1.25	01	P	Pi-_PNA+	root	1293	1817	71.16125481563016	2.119382360009613	0.43425108147080016
RFM-006-521-4	Increasing	Male contraceptive screen [Acrosome]	W0002539	P01	1.25	01	P	Pi-_PNA-	root	35	1817	1.9262520638414968	57.23984619081952	2.271467195385733
RFM-006-521-4	Increasing	Male contraceptive screen [Acrosome]	W0002539	P02	0.373	02	P	Pi+_PNA-	root	162	1648	9.83009708737864	20.274573419850995	2.0977667627974044
RFM-006-521-4	Increasing	Male contraceptive screen [Acrosome]	W0002539	P02	0.373	02	P	Pi+_PNA+	root	300	1648	18.203883495145632	20.366198029319875	0.6079515140591172
RFM-006-521-4	Increasing	Male contraceptive screen [Acrosome]	W0002539	P02	0.373	02	P	Pi-_PNA+	root	531	1648	32.220873786407765	2.119382360009613	0.43425108147080016
RFM-006-521-4	Increasing	Male contraceptive screen [Acrosome]	W0002539	P02	0.373	02	P	Pi-_PNA-	root	655	1648	39.74514563106796	57.23984619081952	2.271467195385733
RFM-006-521-4	Increasing	Male contraceptive screen [Acrosome]	W0002539	P03	0.0932	03	P	Pi+_PNA-	root	174	1332	13.063063063063062	20.274573419850995	2.0977667627974044
RFM-006-521-4	Increasing	Male contraceptive screen [Acrosome]	W0002539	P03	0.0932	03	P	Pi+_PNA+	root	303	1332	22.74774774774775	20.366198029319875	0.6079515140591172
RFM-006-521-4	Increasing	Male contraceptive screen [Acrosome]	W0002539	P03	0.0932	03	P	Pi-_PNA+	root	54	1332	4.054054054054054	2.119382360009613	0.43425108147080016
RFM-006-521-4	Increasing	Male contraceptive screen [Acrosome]	W0002539	P03	0.0932	03	P	Pi-_PNA-	root	801	1332	60.13513513513513	57.23984619081952	2.271467195385733
RFM-006-521-4	Increasing	Male contraceptive screen [Acrosome]	W0002539	P04	0.0466	04	P	Pi+_PNA-	root	127	1176	10.799319727891156	20.274573419850995	2.0977667627974044
RFM-006-521-4	Increasing	Male contraceptive screen [Acrosome]	W0002539	P04	0.0466	04	P	Pi+_PNA+	root	247	1176	21.00340136054422	20.366198029319875	0.6079515140591172
RFM-006-521-4	Increasing	Male contraceptive screen [Acrosome]	W0002539	P04	0.0466	04	P	Pi-_PNA+	root	63	1176	5.357142857142857	2.119382360009613	0.43425108147080016
RFM-006-521-4	Increasing	Male contraceptive screen [Acrosome]	W0002539	P04	0.0466	04	P	Pi-_PNA-	root	739	1176	62.84013605442177	57.23984619081952	2.271467195385733
RFM-006-521-4	Increasing	Male contraceptive screen [Acrosome]	W0002539	P05	0.0139	05	P	Pi+_PNA-	root	140	1082	12.939001848428836	20.274573419850995	2.0977667627974044
RFM-006-521-4	Increasing	Male contraceptive screen [Acrosome]	W0002539	P05	0.0139	05	P	Pi+_PNA+	root	257	1082	23.752310536044362	20.366198029319875	0.6079515140591172
RFM-006-521-4	Increasing	Male contraceptive screen [Acrosome]	W0002539	P05	0.0139	05	P	Pi-_PNA+	root	42	1082	3.8817005545286505	2.119382360009613	0.43425108147080016
RFM-006-521-4	Increasing	Male contraceptive screen [Acrosome]	W0002539	P05	0.0139	05	P	Pi-_PNA-	root	643	1082	59.42698706099815	57.23984619081952	2.271467195385733
RFM-006-521-4	Increasing	Male contraceptive screen [Acrosome]	W0002539	P06	0.00346	06	P	Pi+_PNA-	root	151	1071	14.098972922502334	20.274573419850995	2.0977667627974044
RFM-006-521-4	Increasing	Male contraceptive screen [Acrosome]	W0002539	P06	0.00346	06	P	Pi+_PNA+	root	264	1071	24.649859943977592	20.366198029319875	0.6079515140591172
RFM-006-521-4	Increasing	Male contraceptive screen [Acrosome]	W0002539	P06	0.00346	06	P	Pi-_PNA+	root	48	1071	4.481792717086835	2.119382360009613	0.43425108147080016
RFM-006-521-4	Increasing	Male contraceptive screen [Acrosome]	W0002539	P06	0.00346	06	P	Pi-_PNA-	root	608	1071	56.76937441643324	57.23984619081952	2.271467195385733
RFM-008-110-7	Increasing	Male contraceptive screen [Acrosome]	W0002535	E01	9.99	01	E	Pi+_PNA-	root	1	1487	0.06724949562878278	19.595516569200782	2.5215760233918134
RFM-008-110-7	Increasing	Male contraceptive screen [Acrosome]	W0002535	E01	9.99	01	E	Pi+_PNA+	root	317	1487	21.318090114324143	21.685185185185187	9.362344444444446
RFM-008-110-7	Increasing	Male contraceptive screen [Acrosome]	W0002535	E01	9.99	01	E	Pi-_PNA+	root	1155	1487	77.67316745124411	2.1637426900584797	0.08670175438596507
RFM-008-110-7	Increasing	Male contraceptive screen [Acrosome]	W0002535	E01	9.99	01	E	Pi-_PNA-	root	14	1487	0.941492938802959	56.55555555555556	6.754066666666668
RFM-008-110-7	Increasing	Male contraceptive screen [Acrosome]	W0002535	E02	2.5	02	E	Pi+_PNA-	root	106	837	12.664277180406213	19.595516569200782	2.5215760233918134
RFM-008-110-7	Increasing	Male contraceptive screen [Acrosome]	W0002535	E02	2.5	02	E	Pi+_PNA+	root	178	837	21.26642771804062	21.685185185185187	9.362344444444446
RFM-008-110-7	Increasing	Male contraceptive screen [Acrosome]	W0002535	E02	2.5	02	E	Pi-_PNA+	root	28	837	3.345280764635603	2.1637426900584797	0.08670175438596507
RFM-008-110-7	Increasing	Male contraceptive screen [Acrosome]	W0002535	E02	2.5	02	E	Pi-_PNA-	root	525	837	62.72401433691756	56.55555555555556	6.754066666666668
RFM-008-110-7	Increasing	Male contraceptive screen [Acrosome]	W0002535	E03	1.25	03	E	Pi+_PNA-	root	66	646	10.21671826625387	19.595516569200782	2.5215760233918134
RFM-008-110-7	Increasing	Male contraceptive screen [Acrosome]	W0002535	E03	1.25	03	E	Pi+_PNA+	root	95	646	14.705882352941178	21.685185185185187	9.362344444444446
RFM-008-110-7	Increasing	Male contraceptive screen [Acrosome]	W0002535	E03	1.25	03	E	Pi-_PNA+	root	13	646	2.0123839009287927	2.1637426900584797	0.08670175438596507
RFM-008-110-7	Increasing	Male contraceptive screen [Acrosome]	W0002535	E03	1.25	03	E	Pi-_PNA-	root	472	646	73.06501547987617	56.55555555555556	6.754066666666668
RFM-008-110-7	Increasing	Male contraceptive screen [Acrosome]	W0002535	E04	0.373	04	E	Pi+_PNA-	root	65	728	8.928571428571429	19.595516569200782	2.5215760233918134
RFM-008-110-7	Increasing	Male contraceptive screen [Acrosome]	W0002535	E04	0.373	04	E	Pi+_PNA+	root	135	728	18.543956043956044	21.685185185185187	9.362344444444446
RFM-008-110-7	Increasing	Male contraceptive screen [Acrosome]	W0002535	E04	0.373	04	E	Pi-_PNA+	root	20	728	2.7472527472527473	2.1637426900584797	0.08670175438596507
RFM-008-110-7	Increasing	Male contraceptive screen [Acrosome]	W0002535	E04	0.373	04	E	Pi-_PNA-	root	508	728	69.78021978021978	56.55555555555556	6.754066666666668
RFM-008-110-7	Increasing	Male contraceptive screen [Acrosome]	W0002535	E05	0.0932	05	E	Pi+_PNA-	root	57	590	9.661016949152543	19.595516569200782	2.5215760233918134
RFM-008-110-7	Increasing	Male contraceptive screen [Acrosome]	W0002535	E05	0.0932	05	E	Pi+_PNA+	root	139	590	23.559322033898304	21.685185185185187	9.362344444444446
RFM-008-110-7	Increasing	Male contraceptive screen [Acrosome]	W0002535	E05	0.0932	05	E	Pi-_PNA+	root	16	590	2.711864406779661	2.1637426900584797	0.08670175438596507
RFM-008-110-7	Increasing	Male contraceptive screen [Acrosome]	W0002535	E05	0.0932	05	E	Pi-_PNA-	root	378	590	64.0677966101695	56.55555555555556	6.754066666666668
RFM-008-110-7	Increasing	Male contraceptive screen [Acrosome]	W0002535	E06	0.0466	06	E	Pi+_PNA-	root	68	495	13.737373737373737	19.595516569200782	2.5215760233918134
RFM-008-110-7	Increasing	Male contraceptive screen [Acrosome]	W0002535	E06	0.0466	06	E	Pi+_PNA+	root	101	495	20.404040404040405	21.685185185185187	9.362344444444446
RFM-008-110-7	Increasing	Male contraceptive screen [Acrosome]	W0002535	E06	0.0466	06	E	Pi-_PNA+	root	16	495	3.2323232323232323	2.1637426900584797	0.08670175438596507
RFM-008-110-7	Increasing	Male contraceptive screen [Acrosome]	W0002535	E06	0.0466	06	E	Pi-_PNA-	root	310	495	62.62626262626263	56.55555555555556	6.754066666666668
RFM-008-110-7	Increasing	Male contraceptive screen [Acrosome]	W0002535	E07	0.0139	07	E	Pi+_PNA-	root	62	610	10.163934426229508	19.595516569200782	2.5215760233918134
RFM-008-110-7	Increasing	Male contraceptive screen [Acrosome]	W0002535	E07	0.0139	07	E	Pi+_PNA+	root	169	610	27.704918032786885	21.685185185185187	9.362344444444446
RFM-008-110-7	Increasing	Male contraceptive screen [Acrosome]	W0002535	E07	0.0139	07	E	Pi-_PNA+	root	17	610	2.7868852459016393	2.1637426900584797	0.08670175438596507
RFM-008-110-7	Increasing	Male contraceptive screen [Acrosome]	W0002535	E07	0.0139	07	E	Pi-_PNA-	root	362	610	59.34426229508196	56.55555555555556	6.754066666666668
RFM-008-110-7	Increasing	Male contraceptive screen [Acrosome]	W0002535	E08	0.00346	08	E	Pi+_PNA-	root	69	599	11.519198664440735	19.595516569200782	2.5215760233918134
RFM-008-110-7	Increasing	Male contraceptive screen [Acrosome]	W0002535	E08	0.00346	08	E	Pi+_PNA+	root	153	599	25.542570951585976	21.685185185185187	9.362344444444446
RFM-008-110-7	Increasing	Male contraceptive screen [Acrosome]	W0002535	E08	0.00346	08	E	Pi-_PNA+	root	16	599	2.671118530884808	2.1637426900584797	0.08670175438596507
RFM-008-110-7	Increasing	Male contraceptive screen [Acrosome]	W0002535	E08	0.00346	08	E	Pi-_PNA-	root	361	599	60.26711185308849	56.55555555555556	6.754066666666668
RFM-008-110-7	Increasing	Male contraceptive screen [Acrosome]	W0002537	E01	9.99	01	E	Pi+_PNA-	root	2	1319	0.1516300227445034	25.60821724207551	0.9990263476680813
RFM-008-110-7	Increasing	Male contraceptive screen [Acrosome]	W0002537	E01	9.99	01	E	Pi+_PNA+	root	360	1319	27.293404094010615	23.58419139915203	5.503999091459721
RFM-008-110-7	Increasing	Male contraceptive screen [Acrosome]	W0002537	E01	9.99	01	E	Pi-_PNA+	root	954	1319	72.32752084912812	2.5805067635776298	2.4002824046032702
RFM-008-110-7	Increasing	Male contraceptive screen [Acrosome]	W0002537	E01	9.99	01	E	Pi-_PNA-	root	3	1319	0.22744503411675512	48.22708459519484	6.905255148394909
RFM-008-110-7	Increasing	Male contraceptive screen [Acrosome]	W0002537	E02	2.5	02	E	Pi+_PNA-	root	25	1064	2.3496240601503757	25.60821724207551	0.9990263476680813
RFM-008-110-7	Increasing	Male contraceptive screen [Acrosome]	W0002537	E02	2.5	02	E	Pi+_PNA+	root	257	1064	24.154135338345863	23.58419139915203	5.503999091459721
RFM-008-110-7	Increasing	Male contraceptive screen [Acrosome]	W0002537	E02	2.5	02	E	Pi-_PNA+	root	436	1064	40.97744360902256	2.5805067635776298	2.4002824046032702
RFM-008-110-7	Increasing	Male contraceptive screen [Acrosome]	W0002537	E02	2.5	02	E	Pi-_PNA-	root	346	1064	32.5187969924812	48.22708459519484	6.905255148394909
RFM-008-110-7	Increasing	Male contraceptive screen [Acrosome]	W0002537	E03	1.25	03	E	Pi+_PNA-	root	34	1009	3.3696729435084243	25.60821724207551	0.9990263476680813
RFM-008-110-7	Increasing	Male contraceptive screen [Acrosome]	W0002537	E03	1.25	03	E	Pi+_PNA+	root	197	1009	19.52428146679881	23.58419139915203	5.503999091459721
RFM-008-110-7	Increasing	Male contraceptive screen [Acrosome]	W0002537	E03	1.25	03	E	Pi-_PNA+	root	398	1009	39.44499504459861	2.5805067635776298	2.4002824046032702
RFM-008-110-7	Increasing	Male contraceptive screen [Acrosome]	W0002537	E03	1.25	03	E	Pi-_PNA-	root	380	1009	37.661050545094156	48.22708459519484	6.905255148394909
RFM-008-110-7	Increasing	Male contraceptive screen [Acrosome]	W0002537	E04	0.373	04	E	Pi+_PNA-	root	97	766	12.663185378590077	25.60821724207551	0.9990263476680813
RFM-008-110-7	Increasing	Male contraceptive screen [Acrosome]	W0002537	E04	0.373	04	E	Pi+_PNA+	root	258	766	33.68146214099217	23.58419139915203	5.503999091459721
RFM-008-110-7	Increasing	Male contraceptive screen [Acrosome]	W0002537	E04	0.373	04	E	Pi-_PNA+	root	42	766	5.483028720626632	2.5805067635776298	2.4002824046032702
RFM-008-110-7	Increasing	Male contraceptive screen [Acrosome]	W0002537	E04	0.373	04	E	Pi-_PNA-	root	369	766	48.17232375979113	48.22708459519484	6.905255148394909
RFM-008-110-7	Increasing	Male contraceptive screen [Acrosome]	W0002537	E05	0.0932	05	E	Pi+_PNA-	root	51	543	9.392265193370166	25.60821724207551	0.9990263476680813
RFM-008-110-7	Increasing	Male contraceptive screen [Acrosome]	W0002537	E05	0.0932	05	E	Pi+_PNA+	root	162	543	29.83425414364641	23.58419139915203	5.503999091459721
RFM-008-110-7	Increasing	Male contraceptive screen [Acrosome]	W0002537	E05	0.0932	05	E	Pi-_PNA+	root	23	543	4.23572744014733	2.5805067635776298	2.4002824046032702
RFM-008-110-7	Increasing	Male contraceptive screen [Acrosome]	W0002537	E05	0.0932	05	E	Pi-_PNA-	root	307	543	56.537753222836095	48.22708459519484	6.905255148394909
RFM-008-110-7	Increasing	Male contraceptive screen [Acrosome]	W0002537	E06	0.0466	06	E	Pi+_PNA-	root	64	550	11.636363636363637	25.60821724207551	0.9990263476680813
RFM-008-110-7	Increasing	Male contraceptive screen [Acrosome]	W0002537	E06	0.0466	06	E	Pi+_PNA+	root	142	550	25.818181818181817	23.58419139915203	5.503999091459721
RFM-008-110-7	Increasing	Male contraceptive screen [Acrosome]	W0002537	E06	0.0466	06	E	Pi-_PNA+	root	17	550	3.090909090909091	2.5805067635776298	2.4002824046032702
RFM-008-110-7	Increasing	Male contraceptive screen [Acrosome]	W0002537	E06	0.0466	06	E	Pi-_PNA-	root	327	550	59.45454545454546	48.22708459519484	6.905255148394909
RFM-008-110-7	Increasing	Male contraceptive screen [Acrosome]	W0002537	E07	0.0139	07	E	Pi+_PNA-	root	58	469	12.366737739872068	25.60821724207551	0.9990263476680813
RFM-008-110-7	Increasing	Male contraceptive screen [Acrosome]	W0002537	E07	0.0139	07	E	Pi+_PNA+	root	133	469	28.35820895522388	23.58419139915203	5.503999091459721
RFM-008-110-7	Increasing	Male contraceptive screen [Acrosome]	W0002537	E07	0.0139	07	E	Pi-_PNA+	root	20	469	4.264392324093817	2.5805067635776298	2.4002824046032702
RFM-008-110-7	Increasing	Male contraceptive screen [Acrosome]	W0002537	E07	0.0139	07	E	Pi-_PNA-	root	258	469	55.010660980810236	48.22708459519484	6.905255148394909
RFM-008-110-7	Increasing	Male contraceptive screen [Acrosome]	W0002537	E08	0.00346	08	E	Pi+_PNA-	root	80	584	13.698630136986301	25.60821724207551	0.9990263476680813
RFM-008-110-7	Increasing	Male contraceptive screen [Acrosome]	W0002537	E08	0.00346	08	E	Pi+_PNA+	root	145	584	24.82876712328767	23.58419139915203	5.503999091459721
RFM-008-110-7	Increasing	Male contraceptive screen [Acrosome]	W0002537	E08	0.00346	08	E	Pi-_PNA+	root	16	584	2.73972602739726	2.5805067635776298	2.4002824046032702
RFM-008-110-7	Increasing	Male contraceptive screen [Acrosome]	W0002537	E08	0.00346	08	E	Pi-_PNA-	root	343	584	58.73287671232876	48.22708459519484	6.905255148394909
RFM-009-126-9	Increasing	Male contraceptive screen [Acrosome]	W0002535	F19	9.99	19	F	Pi+_PNA-	root	0	495	0	19.595516569200782	2.5215760233918134
RFM-009-126-9	Increasing	Male contraceptive screen [Acrosome]	W0002535	F19	9.99	19	F	Pi+_PNA+	root	170	495	34.34343434343434	21.685185185185187	9.362344444444446
RFM-009-126-9	Increasing	Male contraceptive screen [Acrosome]	W0002535	F19	9.99	19	F	Pi-_PNA+	root	322	495	65.05050505050505	2.1637426900584797	0.08670175438596507
RFM-009-126-9	Increasing	Male contraceptive screen [Acrosome]	W0002535	F19	9.99	19	F	Pi-_PNA-	root	3	495	0.6060606060606061	56.55555555555556	6.754066666666668
RFM-009-126-9	Increasing	Male contraceptive screen [Acrosome]	W0002535	F20	2.5	20	F	Pi+_PNA-	root	0	681	0	19.595516569200782	2.5215760233918134
RFM-009-126-9	Increasing	Male contraceptive screen [Acrosome]	W0002535	F20	2.5	20	F	Pi+_PNA+	root	234	681	34.36123348017621	21.685185185185187	9.362344444444446
RFM-009-126-9	Increasing	Male contraceptive screen [Acrosome]	W0002535	F20	2.5	20	F	Pi-_PNA+	root	439	681	64.4640234948605	2.1637426900584797	0.08670175438596507
RFM-009-126-9	Increasing	Male contraceptive screen [Acrosome]	W0002535	F20	2.5	20	F	Pi-_PNA-	root	8	681	1.1747430249632893	56.55555555555556	6.754066666666668
RFM-009-126-9	Increasing	Male contraceptive screen [Acrosome]	W0002535	F21	1.25	21	F	Pi+_PNA-	root	0	505	0	19.595516569200782	2.5215760233918134
RFM-009-126-9	Increasing	Male contraceptive screen [Acrosome]	W0002535	F21	1.25	21	F	Pi+_PNA+	root	140	505	27.722772277227726	21.685185185185187	9.362344444444446
RFM-009-126-9	Increasing	Male contraceptive screen [Acrosome]	W0002535	F21	1.25	21	F	Pi-_PNA+	root	356	505	70.49504950495049	2.1637426900584797	0.08670175438596507
RFM-009-126-9	Increasing	Male contraceptive screen [Acrosome]	W0002535	F21	1.25	21	F	Pi-_PNA-	root	9	505	1.782178217821782	56.55555555555556	6.754066666666668
RFM-009-126-9	Increasing	Male contraceptive screen [Acrosome]	W0002535	F22	0.373	22	F	Pi+_PNA-	root	34	736	4.619565217391304	19.595516569200782	2.5215760233918134
RFM-009-126-9	Increasing	Male contraceptive screen [Acrosome]	W0002535	F22	0.373	22	F	Pi+_PNA+	root	144	736	19.565217391304348	21.685185185185187	9.362344444444446
RFM-009-126-9	Increasing	Male contraceptive screen [Acrosome]	W0002535	F22	0.373	22	F	Pi-_PNA+	root	129	736	17.527173913043477	2.1637426900584797	0.08670175438596507
RFM-009-126-9	Increasing	Male contraceptive screen [Acrosome]	W0002535	F22	0.373	22	F	Pi-_PNA-	root	429	736	58.28804347826087	56.55555555555556	6.754066666666668
RFM-009-126-9	Increasing	Male contraceptive screen [Acrosome]	W0002535	G01	0.0932	01	G	Pi+_PNA-	root	62	690	8.985507246376812	19.595516569200782	2.5215760233918134
RFM-009-126-9	Increasing	Male contraceptive screen [Acrosome]	W0002535	G01	0.0932	01	G	Pi+_PNA+	root	137	690	19.855072463768117	21.685185185185187	9.362344444444446
RFM-009-126-9	Increasing	Male contraceptive screen [Acrosome]	W0002535	G01	0.0932	01	G	Pi-_PNA+	root	11	690	1.5942028985507246	2.1637426900584797	0.08670175438596507
RFM-009-126-9	Increasing	Male contraceptive screen [Acrosome]	W0002535	G01	0.0932	01	G	Pi-_PNA-	root	480	690	69.56521739130434	56.55555555555556	6.754066666666668
RFM-009-126-9	Increasing	Male contraceptive screen [Acrosome]	W0002535	G02	0.0466	02	G	Pi+_PNA-	root	65	682	9.530791788856305	19.595516569200782	2.5215760233918134
RFM-009-126-9	Increasing	Male contraceptive screen [Acrosome]	W0002535	G02	0.0466	02	G	Pi+_PNA+	root	110	682	16.129032258064516	21.685185185185187	9.362344444444446
RFM-009-126-9	Increasing	Male contraceptive screen [Acrosome]	W0002535	G02	0.0466	02	G	Pi-_PNA+	root	8	682	1.1730205278592376	2.1637426900584797	0.08670175438596507
RFM-009-126-9	Increasing	Male contraceptive screen [Acrosome]	W0002535	G02	0.0466	02	G	Pi-_PNA-	root	499	682	73.16715542521995	56.55555555555556	6.754066666666668
RFM-009-126-9	Increasing	Male contraceptive screen [Acrosome]	W0002535	G03	0.0139	03	G	Pi+_PNA-	root	44	627	7.017543859649122	19.595516569200782	2.5215760233918134
RFM-009-126-9	Increasing	Male contraceptive screen [Acrosome]	W0002535	G03	0.0139	03	G	Pi+_PNA+	root	98	627	15.629984051036683	21.685185185185187	9.362344444444446
RFM-009-126-9	Increasing	Male contraceptive screen [Acrosome]	W0002535	G03	0.0139	03	G	Pi-_PNA+	root	13	627	2.073365231259968	2.1637426900584797	0.08670175438596507
RFM-009-126-9	Increasing	Male contraceptive screen [Acrosome]	W0002535	G03	0.0139	03	G	Pi-_PNA-	root	472	627	75.27910685805422	56.55555555555556	6.754066666666668
RFM-009-126-9	Increasing	Male contraceptive screen [Acrosome]	W0002535	G04	0.00346	04	G	Pi+_PNA-	root	68	579	11.744386873920552	19.595516569200782	2.5215760233918134
RFM-009-126-9	Increasing	Male contraceptive screen [Acrosome]	W0002535	G04	0.00346	04	G	Pi+_PNA+	root	114	579	19.689119170984455	21.685185185185187	9.362344444444446
RFM-009-126-9	Increasing	Male contraceptive screen [Acrosome]	W0002535	G04	0.00346	04	G	Pi-_PNA+	root	15	579	2.5906735751295336	2.1637426900584797	0.08670175438596507
RFM-009-126-9	Increasing	Male contraceptive screen [Acrosome]	W0002535	G04	0.00346	04	G	Pi-_PNA-	root	382	579	65.97582037996546	56.55555555555556	6.754066666666668
RFM-009-126-9	Increasing	Male contraceptive screen [Acrosome]	W0002537	F19	9.99	19	F	Pi+_PNA-	root	0	830	0	25.60821724207551	0.9990263476680813
RFM-009-126-9	Increasing	Male contraceptive screen [Acrosome]	W0002537	F19	9.99	19	F	Pi+_PNA+	root	225	830	27.10843373493976	23.58419139915203	5.503999091459721
RFM-009-126-9	Increasing	Male contraceptive screen [Acrosome]	W0002537	F19	9.99	19	F	Pi-_PNA+	root	605	830	72.89156626506023	2.5805067635776298	2.4002824046032702
RFM-009-126-9	Increasing	Male contraceptive screen [Acrosome]	W0002537	F19	9.99	19	F	Pi-_PNA-	root	0	830	0	48.22708459519484	6.905255148394909
RFM-009-126-9	Increasing	Male contraceptive screen [Acrosome]	W0002537	F20	2.5	20	F	Pi+_PNA-	root	0	782	0	25.60821724207551	0.9990263476680813
RFM-009-126-9	Increasing	Male contraceptive screen [Acrosome]	W0002537	F20	2.5	20	F	Pi+_PNA+	root	216	782	27.621483375959077	23.58419139915203	5.503999091459721
RFM-009-126-9	Increasing	Male contraceptive screen [Acrosome]	W0002537	F20	2.5	20	F	Pi-_PNA+	root	563	782	71.99488491048594	2.5805067635776298	2.4002824046032702
RFM-009-126-9	Increasing	Male contraceptive screen [Acrosome]	W0002537	F20	2.5	20	F	Pi-_PNA-	root	3	782	0.3836317135549872	48.22708459519484	6.905255148394909
RFM-009-126-9	Increasing	Male contraceptive screen [Acrosome]	W0002537	F21	1.25	21	F	Pi+_PNA-	root	1	782	0.1278772378516624	25.60821724207551	0.9990263476680813
RFM-009-126-9	Increasing	Male contraceptive screen [Acrosome]	W0002537	F21	1.25	21	F	Pi+_PNA+	root	256	782	32.73657289002558	23.58419139915203	5.503999091459721
RFM-009-126-9	Increasing	Male contraceptive screen [Acrosome]	W0002537	F21	1.25	21	F	Pi-_PNA+	root	515	782	65.85677749360613	2.5805067635776298	2.4002824046032702
RFM-009-126-9	Increasing	Male contraceptive screen [Acrosome]	W0002537	F21	1.25	21	F	Pi-_PNA-	root	10	782	1.278772378516624	48.22708459519484	6.905255148394909
RFM-009-126-9	Increasing	Male contraceptive screen [Acrosome]	W0002537	F22	0.373	22	F	Pi+_PNA-	root	31	683	4.538799414348463	25.60821724207551	0.9990263476680813
RFM-009-126-9	Increasing	Male contraceptive screen [Acrosome]	W0002537	F22	0.373	22	F	Pi+_PNA+	root	180	683	26.35431918008785	23.58419139915203	5.503999091459721
RFM-009-126-9	Increasing	Male contraceptive screen [Acrosome]	W0002537	F22	0.373	22	F	Pi-_PNA+	root	147	683	21.522693997071745	2.5805067635776298	2.4002824046032702
RFM-009-126-9	Increasing	Male contraceptive screen [Acrosome]	W0002537	F22	0.373	22	F	Pi-_PNA-	root	325	683	47.58418740849194	48.22708459519484	6.905255148394909
RFM-009-126-9	Increasing	Male contraceptive screen [Acrosome]	W0002537	G01	0.0932	01	G	Pi+_PNA-	root	49	762	6.4304461942257225	25.60821724207551	0.9990263476680813
RFM-009-126-9	Increasing	Male contraceptive screen [Acrosome]	W0002537	G01	0.0932	01	G	Pi+_PNA+	root	179	762	23.490813648293962	23.58419139915203	5.503999091459721
RFM-009-126-9	Increasing	Male contraceptive screen [Acrosome]	W0002537	G01	0.0932	01	G	Pi-_PNA+	root	38	762	4.986876640419948	2.5805067635776298	2.4002824046032702
RFM-009-126-9	Increasing	Male contraceptive screen [Acrosome]	W0002537	G01	0.0932	01	G	Pi-_PNA-	root	496	762	65.09186351706036	48.22708459519484	6.905255148394909
RFM-009-126-9	Increasing	Male contraceptive screen [Acrosome]	W0002537	G02	0.0466	02	G	Pi+_PNA-	root	55	628	8.75796178343949	25.60821724207551	0.9990263476680813
RFM-009-126-9	Increasing	Male contraceptive screen [Acrosome]	W0002537	G02	0.0466	02	G	Pi+_PNA+	root	163	628	25.955414012738853	23.58419139915203	5.503999091459721
RFM-009-126-9	Increasing	Male contraceptive screen [Acrosome]	W0002537	G02	0.0466	02	G	Pi-_PNA+	root	25	628	3.9808917197452227	2.5805067635776298	2.4002824046032702
RFM-009-126-9	Increasing	Male contraceptive screen [Acrosome]	W0002537	G02	0.0466	02	G	Pi-_PNA-	root	385	628	61.30573248407644	48.22708459519484	6.905255148394909
RFM-009-126-9	Increasing	Male contraceptive screen [Acrosome]	W0002537	G03	0.0139	03	G	Pi+_PNA-	root	51	568	8.97887323943662	25.60821724207551	0.9990263476680813
RFM-009-126-9	Increasing	Male contraceptive screen [Acrosome]	W0002537	G03	0.0139	03	G	Pi+_PNA+	root	148	568	26.056338028169012	23.58419139915203	5.503999091459721
RFM-009-126-9	Increasing	Male contraceptive screen [Acrosome]	W0002537	G03	0.0139	03	G	Pi-_PNA+	root	26	568	4.577464788732395	2.5805067635776298	2.4002824046032702
RFM-009-126-9	Increasing	Male contraceptive screen [Acrosome]	W0002537	G03	0.0139	03	G	Pi-_PNA-	root	343	568	60.387323943661976	48.22708459519484	6.905255148394909
RFM-009-126-9	Increasing	Male contraceptive screen [Acrosome]	W0002537	G04	0.00346	04	G	Pi+_PNA-	root	52	577	9.01213171577123	25.60821724207551	0.9990263476680813
RFM-009-126-9	Increasing	Male contraceptive screen [Acrosome]	W0002537	G04	0.00346	04	G	Pi+_PNA+	root	156	577	27.03639514731369	23.58419139915203	5.503999091459721
RFM-009-126-9	Increasing	Male contraceptive screen [Acrosome]	W0002537	G04	0.00346	04	G	Pi-_PNA+	root	19	577	3.2928942807625647	2.5805067635776298	2.4002824046032702
RFM-009-126-9	Increasing	Male contraceptive screen [Acrosome]	W0002537	G04	0.00346	04	G	Pi-_PNA-	root	350	577	60.65857885615251	48.22708459519484	6.905255148394909
RFM-003-263-3	Increasing	Male contraceptive screen [Acrosome]	W0002531	E01	9.99	01	E	Pi+_PNA-	root	8	1030	0.7766990291262136	17.094298245614034	2.4547434210526315
RFM-003-263-3	Increasing	Male contraceptive screen [Acrosome]	W0002531	E01	9.99	01	E	Pi+_PNA+	root	261	1030	25.339805825242717	20.419407894736842	0.15850164473684264
RFM-003-263-3	Increasing	Male contraceptive screen [Acrosome]	W0002531	E01	9.99	01	E	Pi-_PNA+	root	745	1030	72.33009708737865	2.5834116541353387	0.8517286184210525
RFM-003-263-3	Increasing	Male contraceptive screen [Acrosome]	W0002531	E01	9.99	01	E	Pi-_PNA-	root	16	1030	1.5533980582524272	59.90288220551379	1.4445131578947379
RFM-003-263-3	Increasing	Male contraceptive screen [Acrosome]	W0002531	E02	2.5	02	E	Pi+_PNA-	root	55	782	7.033248081841433	17.094298245614034	2.4547434210526315
RFM-003-263-3	Increasing	Male contraceptive screen [Acrosome]	W0002531	E02	2.5	02	E	Pi+_PNA+	root	160	782	20.460358056265985	20.419407894736842	0.15850164473684264
RFM-003-263-3	Increasing	Male contraceptive screen [Acrosome]	W0002531	E02	2.5	02	E	Pi-_PNA+	root	143	782	18.286445012787723	2.5834116541353387	0.8517286184210525
RFM-003-263-3	Increasing	Male contraceptive screen [Acrosome]	W0002531	E02	2.5	02	E	Pi-_PNA-	root	424	782	54.21994884910486	59.90288220551379	1.4445131578947379
RFM-003-263-3	Increasing	Male contraceptive screen [Acrosome]	W0002531	E03	1.25	03	E	Pi+_PNA-	root	70	778	8.997429305912597	17.094298245614034	2.4547434210526315
RFM-003-263-3	Increasing	Male contraceptive screen [Acrosome]	W0002531	E03	1.25	03	E	Pi+_PNA+	root	198	778	25.449871465295633	20.419407894736842	0.15850164473684264
RFM-003-263-3	Increasing	Male contraceptive screen [Acrosome]	W0002531	E03	1.25	03	E	Pi-_PNA+	root	22	778	2.827763496143959	2.5834116541353387	0.8517286184210525
RFM-003-263-3	Increasing	Male contraceptive screen [Acrosome]	W0002531	E03	1.25	03	E	Pi-_PNA-	root	488	778	62.724935732647815	59.90288220551379	1.4445131578947379
RFM-003-263-3	Increasing	Male contraceptive screen [Acrosome]	W0002531	E04	0.373	04	E	Pi+_PNA-	root	80	706	11.3314447592068	17.094298245614034	2.4547434210526315
RFM-003-263-3	Increasing	Male contraceptive screen [Acrosome]	W0002531	E04	0.373	04	E	Pi+_PNA+	root	130	706	18.413597733711047	20.419407894736842	0.15850164473684264
RFM-003-263-3	Increasing	Male contraceptive screen [Acrosome]	W0002531	E04	0.373	04	E	Pi-_PNA+	root	19	706	2.6912181303116145	2.5834116541353387	0.8517286184210525
RFM-003-263-3	Increasing	Male contraceptive screen [Acrosome]	W0002531	E04	0.373	04	E	Pi-_PNA-	root	477	706	67.56373937677054	59.90288220551379	1.4445131578947379
RFM-003-263-3	Increasing	Male contraceptive screen [Acrosome]	W0002531	E05	0.0932	05	E	Pi+_PNA-	root	84	624	13.461538461538462	17.094298245614034	2.4547434210526315
RFM-003-263-3	Increasing	Male contraceptive screen [Acrosome]	W0002531	E05	0.0932	05	E	Pi+_PNA+	root	153	624	24.519230769230766	20.419407894736842	0.15850164473684264
RFM-003-263-3	Increasing	Male contraceptive screen [Acrosome]	W0002531	E05	0.0932	05	E	Pi-_PNA+	root	18	624	2.8846153846153846	2.5834116541353387	0.8517286184210525
RFM-003-263-3	Increasing	Male contraceptive screen [Acrosome]	W0002531	E05	0.0932	05	E	Pi-_PNA-	root	369	624	59.13461538461539	59.90288220551379	1.4445131578947379
RFM-003-263-3	Increasing	Male contraceptive screen [Acrosome]	W0002531	E06	0.0466	06	E	Pi+_PNA-	root	64	529	12.098298676748582	17.094298245614034	2.4547434210526315
RFM-003-263-3	Increasing	Male contraceptive screen [Acrosome]	W0002531	E06	0.0466	06	E	Pi+_PNA+	root	86	529	16.257088846880908	20.419407894736842	0.15850164473684264
RFM-003-263-3	Increasing	Male contraceptive screen [Acrosome]	W0002531	E06	0.0466	06	E	Pi-_PNA+	root	9	529	1.7013232514177694	2.5834116541353387	0.8517286184210525
RFM-003-263-3	Increasing	Male contraceptive screen [Acrosome]	W0002531	E06	0.0466	06	E	Pi-_PNA-	root	370	529	69.94328922495274	59.90288220551379	1.4445131578947379
RFM-003-263-3	Increasing	Male contraceptive screen [Acrosome]	W0002531	E07	0.0139	07	E	Pi+_PNA-	root	73	571	12.784588441331	17.094298245614034	2.4547434210526315
RFM-003-263-3	Increasing	Male contraceptive screen [Acrosome]	W0002531	E07	0.0139	07	E	Pi+_PNA+	root	116	571	20.31523642732049	20.419407894736842	0.15850164473684264
RFM-003-263-3	Increasing	Male contraceptive screen [Acrosome]	W0002531	E07	0.0139	07	E	Pi-_PNA+	root	20	571	3.502626970227671	2.5834116541353387	0.8517286184210525
RFM-003-263-3	Increasing	Male contraceptive screen [Acrosome]	W0002531	E07	0.0139	07	E	Pi-_PNA-	root	362	571	63.397548161120845	59.90288220551379	1.4445131578947379
RFM-003-263-3	Increasing	Male contraceptive screen [Acrosome]	W0002531	E08	0.00346	08	E	Pi+_PNA-	root	103	599	17.195325542570952	17.094298245614034	2.4547434210526315
RFM-003-263-3	Increasing	Male contraceptive screen [Acrosome]	W0002531	E08	0.00346	08	E	Pi+_PNA+	root	147	599	24.540901502504173	20.419407894736842	0.15850164473684264
RFM-003-263-3	Increasing	Male contraceptive screen [Acrosome]	W0002531	E08	0.00346	08	E	Pi-_PNA+	root	15	599	2.5041736227045077	2.5834116541353387	0.8517286184210525
RFM-003-263-3	Increasing	Male contraceptive screen [Acrosome]	W0002531	E08	0.00346	08	E	Pi-_PNA-	root	334	599	55.75959933222037	59.90288220551379	1.4445131578947379
RFM-003-263-3	Increasing	Male contraceptive screen [Acrosome]	W0002533	E01	9.99	01	E	Pi+_PNA-	root	52	1026	5.0682261208577	18.570404505888376	1.504615053763443
RFM-003-263-3	Increasing	Male contraceptive screen [Acrosome]	W0002533	E01	9.99	01	E	Pi+_PNA+	root	237	1026	23.099415204678362	28.34767025089606	3.7676107526881735
RFM-003-263-3	Increasing	Male contraceptive screen [Acrosome]	W0002533	E01	9.99	01	E	Pi-_PNA+	root	150	1026	14.619883040935672	1.6912442396313363	0.4577612903225806
RFM-003-263-3	Increasing	Male contraceptive screen [Acrosome]	W0002533	E01	9.99	01	E	Pi-_PNA-	root	587	1026	57.21247563352827	51.39068100358423	2.7207569892473056
RFM-003-263-3	Increasing	Male contraceptive screen [Acrosome]	W0002533	E02	2.5	02	E	Pi+_PNA-	root	49	711	6.891701828410689	18.570404505888376	1.504615053763443
RFM-003-263-3	Increasing	Male contraceptive screen [Acrosome]	W0002533	E02	2.5	02	E	Pi+_PNA+	root	186	711	26.160337552742618	28.34767025089606	3.7676107526881735
RFM-003-263-3	Increasing	Male contraceptive screen [Acrosome]	W0002533	E02	2.5	02	E	Pi-_PNA+	root	17	711	2.390998593530239	1.6912442396313363	0.4577612903225806
RFM-003-263-3	Increasing	Male contraceptive screen [Acrosome]	W0002533	E02	2.5	02	E	Pi-_PNA-	root	459	711	64.55696202531645	51.39068100358423	2.7207569892473056
RFM-003-263-3	Increasing	Male contraceptive screen [Acrosome]	W0002533	E03	1.25	03	E	Pi+_PNA-	root	51	691	7.380607814761215	18.570404505888376	1.504615053763443
RFM-003-263-3	Increasing	Male contraceptive screen [Acrosome]	W0002533	E03	1.25	03	E	Pi+_PNA+	root	228	691	32.99565846599132	28.34767025089606	3.7676107526881735
RFM-003-263-3	Increasing	Male contraceptive screen [Acrosome]	W0002533	E03	1.25	03	E	Pi-_PNA+	root	28	691	4.052098408104197	1.6912442396313363	0.4577612903225806
RFM-003-263-3	Increasing	Male contraceptive screen [Acrosome]	W0002533	E03	1.25	03	E	Pi-_PNA-	root	384	691	55.571635311143275	51.39068100358423	2.7207569892473056
RFM-003-263-3	Increasing	Male contraceptive screen [Acrosome]	W0002533	E04	0.373	04	E	Pi+_PNA-	root	49	618	7.9288025889967635	18.570404505888376	1.504615053763443
RFM-003-263-3	Increasing	Male contraceptive screen [Acrosome]	W0002533	E04	0.373	04	E	Pi+_PNA+	root	159	618	25.728155339805824	28.34767025089606	3.7676107526881735
RFM-003-263-3	Increasing	Male contraceptive screen [Acrosome]	W0002533	E04	0.373	04	E	Pi-_PNA+	root	19	618	3.074433656957929	1.6912442396313363	0.4577612903225806
RFM-003-263-3	Increasing	Male contraceptive screen [Acrosome]	W0002533	E04	0.373	04	E	Pi-_PNA-	root	391	618	63.26860841423948	51.39068100358423	2.7207569892473056
RFM-003-263-3	Increasing	Male contraceptive screen [Acrosome]	W0002533	E05	0.0932	05	E	Pi+_PNA-	root	41	609	6.732348111658457	18.570404505888376	1.504615053763443
RFM-003-263-3	Increasing	Male contraceptive screen [Acrosome]	W0002533	E05	0.0932	05	E	Pi+_PNA+	root	151	609	24.794745484400657	28.34767025089606	3.7676107526881735
RFM-003-263-3	Increasing	Male contraceptive screen [Acrosome]	W0002533	E05	0.0932	05	E	Pi-_PNA+	root	20	609	3.284072249589491	1.6912442396313363	0.4577612903225806
RFM-003-263-3	Increasing	Male contraceptive screen [Acrosome]	W0002533	E05	0.0932	05	E	Pi-_PNA-	root	397	609	65.1888341543514	51.39068100358423	2.7207569892473056
RFM-003-263-3	Increasing	Male contraceptive screen [Acrosome]	W0002533	E06	0.0466	06	E	Pi+_PNA-	root	31	667	4.6476761619190405	18.570404505888376	1.504615053763443
RFM-003-263-3	Increasing	Male contraceptive screen [Acrosome]	W0002533	E06	0.0466	06	E	Pi+_PNA+	root	163	667	24.43778110944528	28.34767025089606	3.7676107526881735
RFM-003-263-3	Increasing	Male contraceptive screen [Acrosome]	W0002533	E06	0.0466	06	E	Pi-_PNA+	root	13	667	1.9490254872563717	1.6912442396313363	0.4577612903225806
RFM-003-263-3	Increasing	Male contraceptive screen [Acrosome]	W0002533	E06	0.0466	06	E	Pi-_PNA-	root	460	667	68.96551724137932	51.39068100358423	2.7207569892473056
RFM-003-263-3	Increasing	Male contraceptive screen [Acrosome]	W0002533	E07	0.0139	07	E	Pi+_PNA-	root	31	498	6.2248995983935735	18.570404505888376	1.504615053763443
RFM-003-263-3	Increasing	Male contraceptive screen [Acrosome]	W0002533	E07	0.0139	07	E	Pi+_PNA+	root	109	498	21.88755020080321	28.34767025089606	3.7676107526881735
RFM-003-263-3	Increasing	Male contraceptive screen [Acrosome]	W0002533	E07	0.0139	07	E	Pi-_PNA+	root	14	498	2.8112449799196786	1.6912442396313363	0.4577612903225806
RFM-003-263-3	Increasing	Male contraceptive screen [Acrosome]	W0002533	E07	0.0139	07	E	Pi-_PNA-	root	344	498	69.07630522088354	51.39068100358423	2.7207569892473056
RFM-003-263-3	Increasing	Male contraceptive screen [Acrosome]	W0002533	E08	0.00346	08	E	Pi+_PNA-	root	39	557	7.001795332136446	18.570404505888376	1.504615053763443
RFM-003-263-3	Increasing	Male contraceptive screen [Acrosome]	W0002533	E08	0.00346	08	E	Pi+_PNA+	root	160	557	28.725314183123878	28.34767025089606	3.7676107526881735
RFM-003-263-3	Increasing	Male contraceptive screen [Acrosome]	W0002533	E08	0.00346	08	E	Pi-_PNA+	root	10	557	1.7953321364452424	1.6912442396313363	0.4577612903225806
RFM-003-263-3	Increasing	Male contraceptive screen [Acrosome]	W0002533	E08	0.00346	08	E	Pi-_PNA-	root	348	557	62.47755834829444	51.39068100358423	2.7207569892473056
