# Supplementary material for: A phenotypic screening platform utilising human spermatozoa identifies compounds with contraceptive activity
Source: eLife. 2020 Jan 28;9:e51739. doi: 10.7554/eLife.51739 (PMC7046468; doi:10.7554/eLife.51739)
Supplement: Source data 2. [file elife-51739-data2.csv]

Name	EC50 [µM]	Efficacy [% induction]	Information
Tyrothricin	1.67	84	Antibiotic
Th-9402	0.4	76	Immunosuppressant
Mln 576	>100	76	DNA topoisomerase II inhibitor
Topixantrone	0.49	72	DNA topoisomerase II inhibitor
Proflavine	2.74	71	DNA synthesis interchalator
Imidazoacridinone	3.85	71	DNA topoisomerase II inhibitor
Manoalide	4.68	59	Ornithin Decarboxylase/PLA2 inhibitor
Merbromin	2.86	27	Carbonic anhydrase II inhibitor
Acranil	21.61	25	Antiprotozoal
