# Supplementary material for: A phenotypic screening platform utilising human spermatozoa identifies compounds with contraceptive activity
Source: eLife journal article supplement (doi:10.7554/elife.51739), 2020-01-27
Supplement: supp [file elife_poa_e51739_Figure_3_figure_supplement_1.pdf › elife_poa_e51739_Figure_3_figure_supplement_1.pdf]

# Figure 3-figure supplement 1

## Tyrosinricin Antibiotic

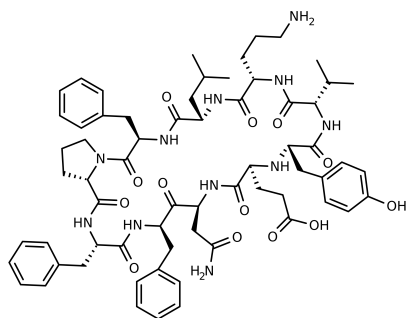

MW (RDKit)  
1227.633

QED (RDKit)  
0.063

SlogP (RDKit)  
1.138

TPSA (RDKit)  
379.75

### RFM-011-941-5

Hill slope: 3.133 EC50: 1.675  $\mu$ M

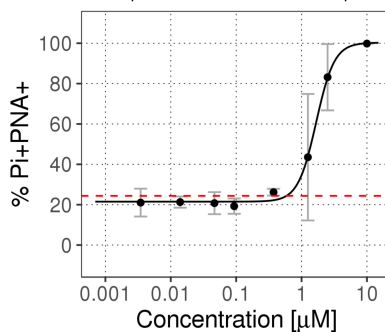

EC50 [μM]  
1.67

Efficacy [% induction]  
84

Hek CC50 [μM]  
1.791

HepG2 CC50 [μM]  
0

## MIn 576

DNA topoisomerase II inhibitor

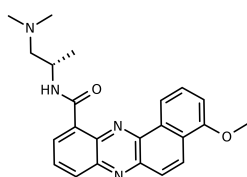

MW (RDKit)  
388.19

QED (RDKit)  
0.418

SlogP (RDKit)  
3.625

TPSA (RDKit)  
67.35

### RFM-008-110-7

Hill slope: 0.846 EC50: >10  $\mu$ M

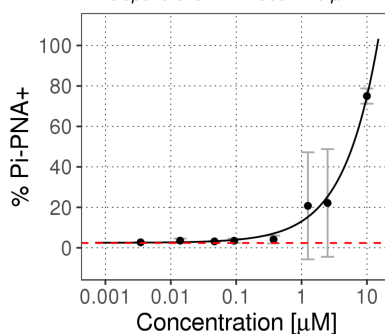

EC50 [μM]  
>10

Efficacy [% induction]  
76

Hek CC50 [μM]  
0.686

HepG2 CC50 [μM]  
0.574

## Th-9402

Immunosuppressant

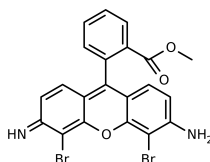

MW (RDKit)  
499.937

QED (RDKit)  
0.213

SlogP (RDKit)  
5.578

TPSA (RDKit)  
89.31

### RFM-006-521-4

Hill slope: 4.118 EC50: 0.404  $\mu$ M

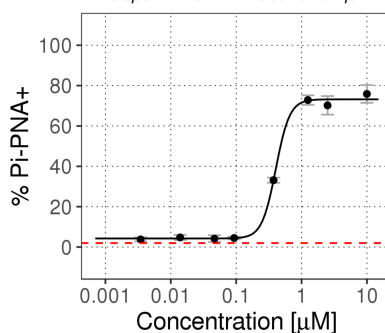

EC50 [μM]  
0.4

Efficacy [% induction]  
76

Hek CC50 [μM]  
0

HepG2 CC50 [μM]  
0

## Topixantrone

DNA topoisomerase II inhibitor

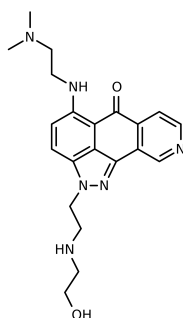

MW (RDKit)  
394.212

QED (RDKit)  
0.367

SlogP (RDKit)  
1.198

TPSA (RDKit)  
95.31

### RFM-009-126-9

Hill slope: 3.952 EC50: 0.491  $\mu$ M

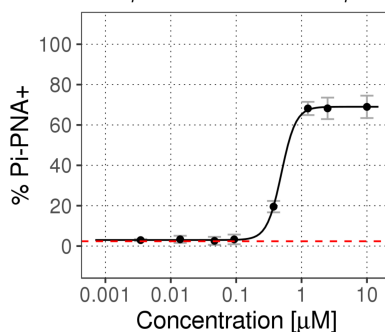

EC50 [μM]  
0.49

Efficacy [% induction]  
72

Hek CC50 [μM]  
1.443

HepG2 CC50 [μM]  
0.658

**Imidazoacridinone**  
DNA topoisomerase II inhibitor

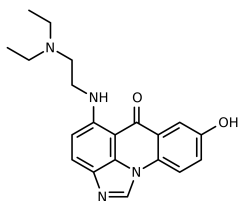

**MW (RDKit)**  
350.174

**QED (RDKit)**  
0.523

**SlogP (RDKit)**  
2.898

**TPSA (RDKit)**  
69.87

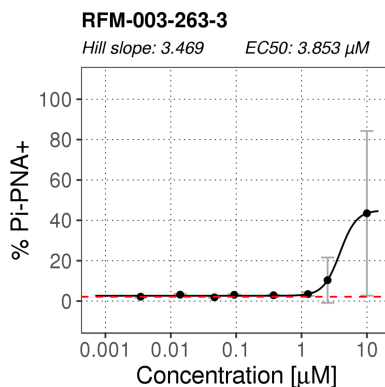

**EC50 [ $\mu$ M]**  
3.85

**Efficacy [% induction]**  
71

**Hek CC50 [ $\mu$ M]**  
0.817

**HepG2 CC50 [ $\mu$ M]**  
0.476

**Proflavine**  
DNA synthesis intercalator

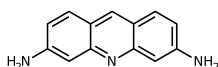

**MW (RDKit)**  
209.095

**QED (RDKit)**  
0.441

**SlogP (RDKit)**  
2.552

**TPSA (RDKit)**  
64.93

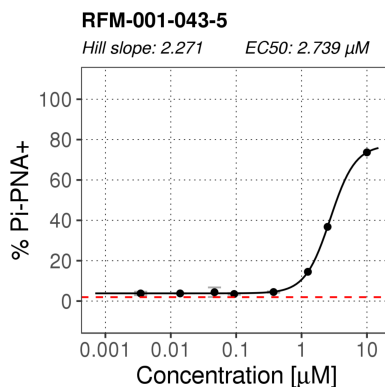

**EC50 [ $\mu$ M]**  
2.74

**Efficacy [% induction]**  
71

**Hek CC50 [ $\mu$ M]**  
0

**HepG2 CC50 [ $\mu$ M]**  
0

**Manoalide**  
Ornithin Decarboxylase/PLA2 inhibitor

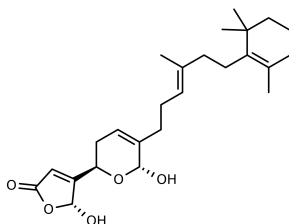

**MW (RDKit)**  
416.256

**QED (RDKit)**  
0.458

**SlogP (RDKit)**  
4.855

**TPSA (RDKit)**  
75.99

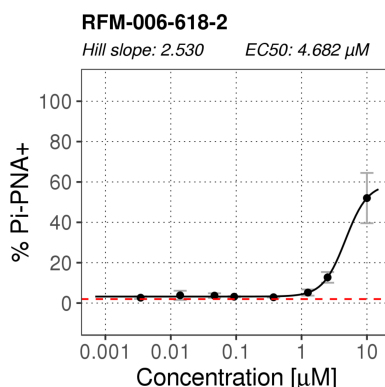

**EC50 [ $\mu$ M]**  
4.68

**Efficacy [% induction]**  
59

**Hek CC50 [ $\mu$ M]**  
2.781

**HepG2 CC50 [ $\mu$ M]**  
3.522

**Merbromin**  
Carbonic anhydrase II inhibitor

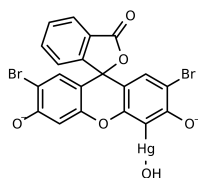

**MW (RDKit)**  
703.841

**QED (RDKit)**  
0.309

**SlogP (RDKit)**  
2.542

**TPSA (RDKit)**  
101.88

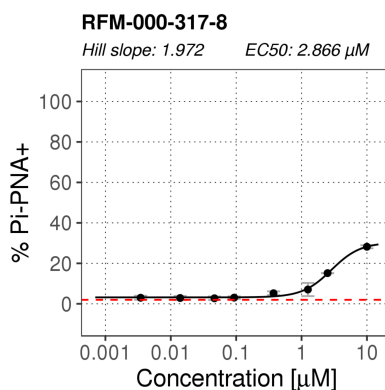

**EC50 [ $\mu$ M]**  
2.86

**Efficacy [% induction]**  
27

**Hek CC50 [ $\mu$ M]**  
0

**HepG2 CC50 [ $\mu$ M]**  
0

**Acranil**  
Antiprotozoal

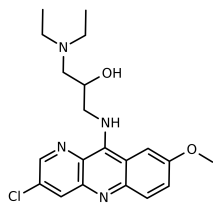

**MW (RDKit)**  
387.171

**QED (RDKit)**  
0.568

**SlogP (RDKit)**  
4.165

**TPSA (RDKit)**  
57.62

**RFM-000-968-7**

Hill slope: 3.134 EC50: >10  $\mu$ M

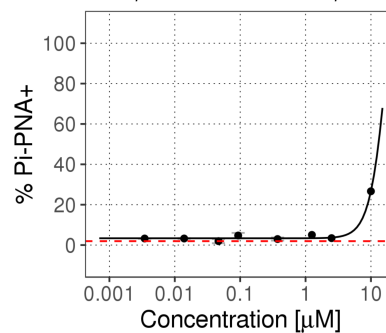

**EC50 [ $\mu$ M]**  
>10

**Efficacy [% induction]**  
25

**Hek CC50 [ $\mu$ M]**  
1.136

**HepG2 CC50 [ $\mu$ M]**  
2.827
