# Supplementary figures and images for: A phenotypic screening platform utilising human spermatozoa identifies compounds with contraceptive activity
Source: eLife journal article supplement (doi:10.7554/elife.51739), 2020-01-27

Figure 1-figure supplement 1

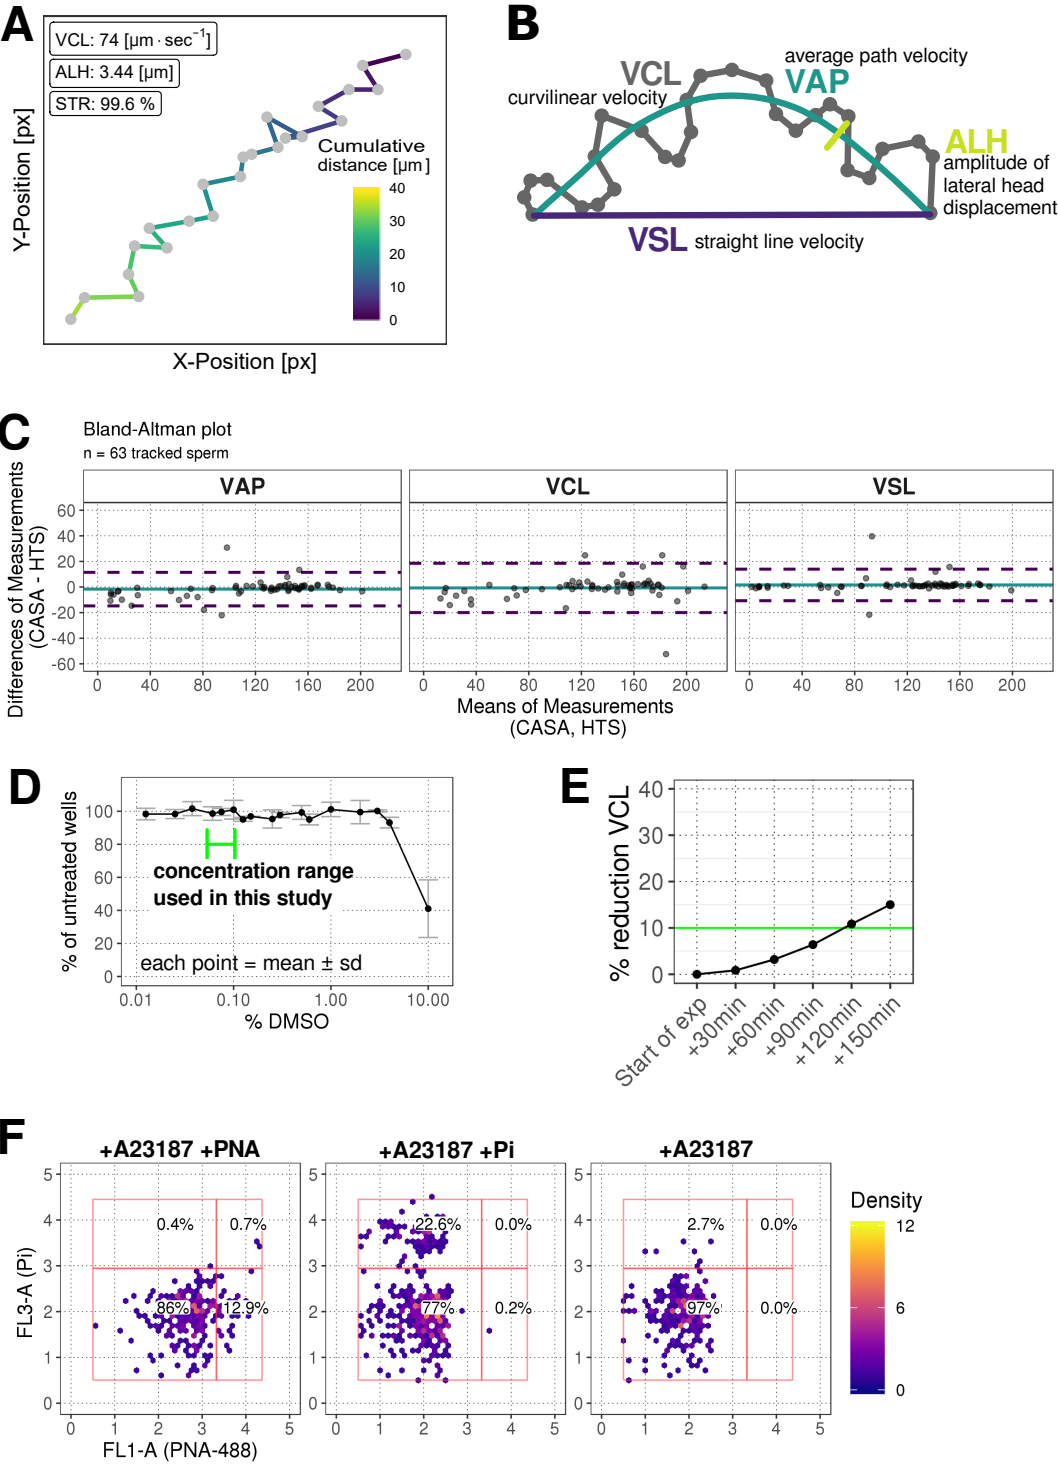

Supplement: supp [file elife_poa_e51739_Figure_1_figure_supplement_1.pdf › elife_poa_e51739_Figure_1_figure_supplement_1.pdf]

Figure 1-figure supplement 2

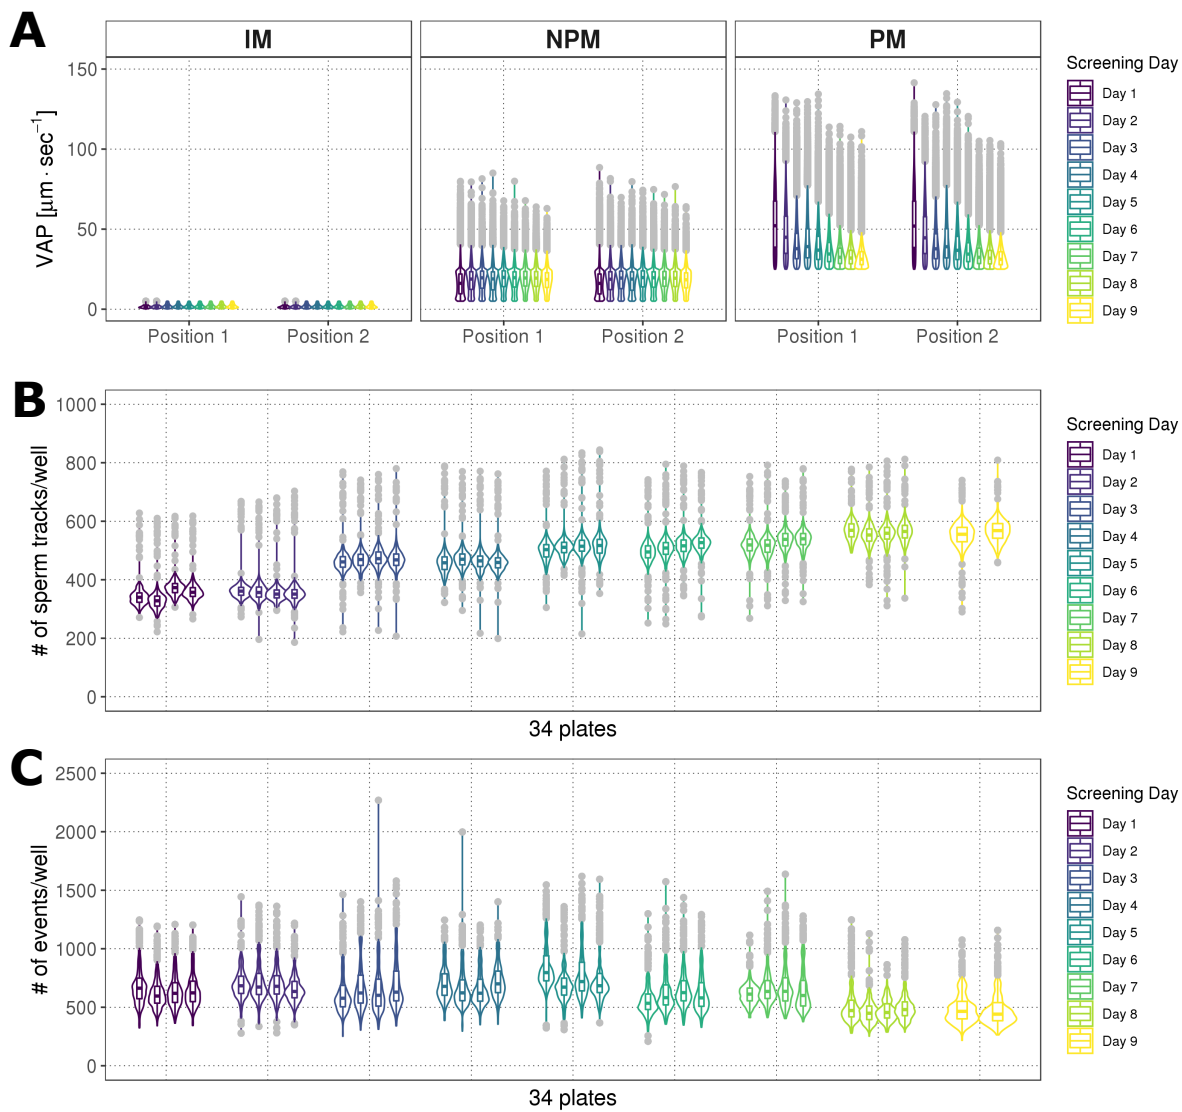

Supplement: supp [file elife_poa_e51739_Figure_1_figure_supplement_2.pdf › elife_poa_e51739_Figure_1_figure_supplement_2.pdf]

Figure 2-figure supplement 2

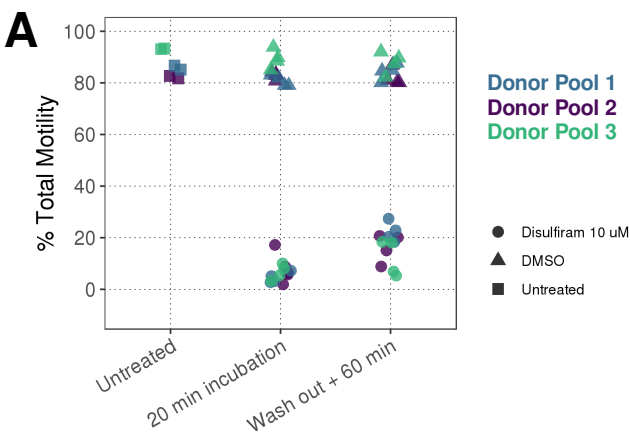

Supplement: supp [file elife_poa_e51739_Figure_2_figure_supplement_2.pdf › elife_poa_e51739_Figure_2_figure_supplement_2.pdf]

Figure 3-figure supplement 2

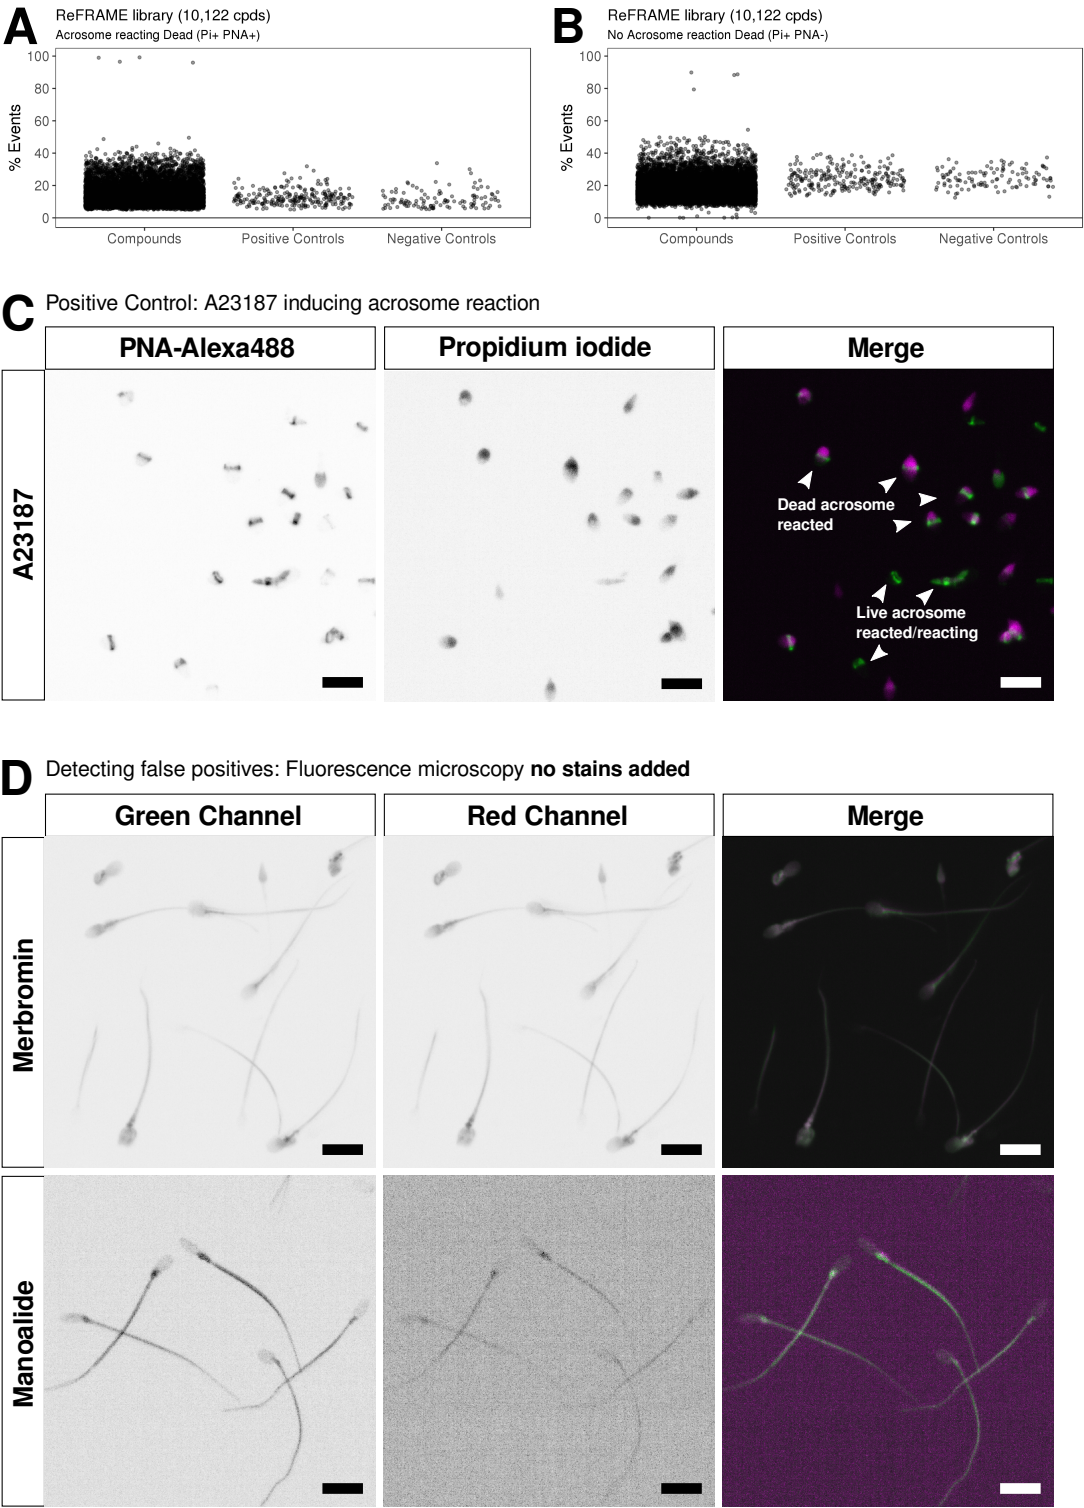

Supplement: supp [file elife_poa_e51739_Figure_3_figure_supplement_2.pdf › elife_poa_e51739_Figure_3_figure_supplement_2.pdf]
